# Supplementary material for: CRISPR screens identify gene targets and drug repositioning opportunities at breast cancer risk loci
Source: Research Square preprint supplement (doi:10.21203/rs.3.rs-1223972/v1), 2022-01-07
Supplement: Supplementary file 1 [file 05cf3ecb3eff9746d2acb4f9.xlsx]

## Sheet: Info
Supplementary_Table 9: sgRNAs used in validation experiments

## Sheet: Supplementary Table 9
Name	Target Sequence	Application
sgAAVS1_1	GTGGTTGATAAACCCACGTG	CRISPRko/a
sgAAVS1_2	CGGGCCCCTATGTCCACTTC	CRISPRko/a
sgAAVS1_3	GCCAGCCGTAGAGGTGACCC	CRISPRko/a
sgADCY3_1	CTCACACCACCGCCCACCGC	CRISPRa
sgADCY3_2	CTAAGTGTGCCTGCGGTGGG	CRISPRa
sgADCY3_3	CCCGCCCTAACCCTCATAAA	CRISPRa
sgATF7IP_1	AAAAGATTGAATGTAACAAG	CRISPRko
sgATF7IP_2	GCTACTACTCAGGTGCCTAG	CRISPRko
sgATF7IP_3	GGGATGGGATCACTAGAGGT	CRISPRko
sgATF7IP_Enh_1	GCCGGATCCGCCCTAACAAAG	CRISPRi Enh
sgATF7IP_Enh_2	GCCACCAAATCCAGTTCAGGG	CRISPRi Enh
sgATF7IP_Enh_3	GCCTCGGCAGAGACTTCACTA	CRISPRi Enh
sgATF7IP_Enh_4	GAAATATAAGGCCTGGAGCG	CRISPRi Enh
sgATM_1	CCACCAAAAGACGTGAACAC	CRISPRko
sgATM_2	GACCTACCTGAATAACACAC	CRISPRko
sgATM_3	AGCATCCTTACAGTAAGTCA	CRISPRko
sgATXN7_1	CATACTCACATTCTACCATG	CRISPRko
sgATXN7_2	GAGCCGCACCAAAACCCTCA	CRISPRko
sgATXN7_3	TGGGTTAAGGAATGTGTCTG	CRISPRko
sgBRCA1_2	GGCTCAGGGTTACCGAAGAG	CRISPRko
sgCASZ1_1	CATGGGAGGTTTGGTCTCGG	CRISPRko
sgCASZ1_2	GCTATGATGACCAGAACACG	CRISPRko
sgCASZ1_3	GGGAGCGCCTTACTTGACAG	CRISPRko
sgCCND1_1	CTCCCGCTCCCATTCTCTGC	CRISPRa
sgCCND1_2	GATCAAAGCCCGGCAGAGAA	CRISPRa
sgCCND1_3	GTTAAGCAAAGATCAAAGCC	CRISPRa
sgCCNE1_1	GGGTCCCGCGCGGCCGCTGA	CRISPRa
sgCCNE1_2	GACGGGCTCTGGGTCCCGCG	CRISPRa
sgCCNE1_3	TGGGTCCCGCGCGGCCGCTG	CRISPRa
sgCFL1_1	TGATGCAACCTATGAGACCA	CRISPRko
sgCFL1_2	TTGCATCATAGAGGGCATAG	CRISPRko
sgCFL1_3	TCTTGACAAAGGTGGCGTAG	CRISPRko
sgCMTR2_1	CCAATGACAAGGAAACCGAT	CRISPRko
sgCMTR2_2	ATTCGTCTATTTGAGTGCAT	CRISPRko
sgCMTR2_3	AGGAAACTCCGAAGTCTATG	CRISPRko
sgCREBBP_1	ATTGCCCCCCTCCAAACACG	CRISPRko
sgCREBBP_2	TAATTAATCAGGCTTCACAA	CRISPRko
sgCREBBP_3	CTTAGCCCACTGATGAACGA	CRISPRko
sgDUSP4_1	ATGAACCGGGACGAGAATGG	CRISPRko
sgDUSP4_2	TGGGACCCCACTACACGACC	CRISPRko
sgDUSP4_3	TCAGTACAAGTGCATCCCAG	CRISPRko
sgLPAR2_1	AGCATGACCACGCGGCCACG	CRISPRko
sgLPAR2_2	AGTGAAAGTCGGGCTGTGCG	CRISPRko
sgLPAR2_3	CATGCGTGAGCAGCGGTCCA	CRISPRko
sgMYC_1	CTCCTGCCTCGAGAAGGGCA	CRISPRa
sgMYC_2	CTCCCCTCCTGCCTCGAGAA	CRISPRa
sgMYC_3	CTGCCCTTCTCGAGGCAGGA	CRISPRa
sgNF1_1	ACCTTAACCATTGCAAACCA	CRISPRko
sgNF1_2	GCAACTTTGATGCAGCACGC	CRISPRko
sgNF1_3	GGTCCAGTCAGTGAACGTAA	CRISPRko
sgNRIP1_1	GAAGAAGGAATGATACCCAT	CRISPRko
sgNRIP1_2	TCAATACACAAAATTATGCA	CRISPRko
sgNRIP1_3	TGGATCCCAAGTGTTTAGCA	CRISPRko
sgNRIP1_1a	CTGAAGAGCTGAATGGCGTG	CRISPRa
sgNRIP1_2a	AAGAGCTGAATGGCGTGGGG	CRISPRa
sgNRIP1_3a	GCTGAAGAGCTGAATGGCGT	CRISPRa
sgSIVA1_1	CACAGCCTTCATCCCACACG	CRISPRko
sgSIVA1_2	GCGGACCTTGAGCTGTAGCG	CRISPRko
sgSIVA1_3	AGCGCTCGGCGCACACGCCG	CRISPRko
sgTGFBR2_1	AAAGCGACCTTTCCCCACCA	CRISPRko
sgTGFBR2_2	ACAGTGATCACACTCCATGT	CRISPRko
sgTGFBR2_3	GCAGAAGCTGAGTTCAACCT	CRISPRko
sgTNFSF10_1	TTGAGACAAGAGCTGTCCCT	CRISPRa
sgTNFSF10_2	AGTTGCAGGTTCAATAGATG	CRISPRa
sgTNFSF10_3	GTTGCAGGTTCAATAGATGT	CRISPRa
