# Supplementary material for: CRISPR screens identify gene targets and drug repositioning opportunities at breast cancer risk loci
Source: Research Square preprint supplement (doi:10.21203/rs.3.rs-1223972/v1), 2022-01-07
Supplement: Supplementary file 3 [file a23a13593d4945e2a1d90c87.xlsx]

## Sheet: Info
Supplementary Table 8: L1000 analysis identifies opportunities for drug repurposing
Connectivity scores werer obtained by inputing the top 150 up and down regulated genes were used to query the L1000 database (https://clue.io/repurposing).
Perturbagen classes (PCL) - are collections of compounds.
PERT - connectivity scores of individual compounds.

## Sheet: PCL
PCL	EGFR	MTOR	PIK3CA	RPTOR	NF2	TP53	PTEN	CFL1	MYC	RANBP9	RIC8A	CREBBP	CCND1	CCNE1	TNFSF10	ADCY3	CDKN2A	CTNNB1	ERBB2	MAPK3	SMAD4	ATR	ACVR2A	APC	ARID1A	CDKN1B	CSNK1A1	LEF1	MAPK1	SMARCC1	VPS45	SMAD2	SMARCB1	SMARCC2	TGFBR2	WWTR1	XRCC2	YAP1	CDKN1A	RB1	SAV1	CUL5	TGFBR1	NRIP1	LPAR2	DUSP4	ATF7IP	ATXN7	BRCA2
OE_CELL_CYCLE_INHIBITION	97.91	0	84.4	0	-13	74.95	-2.15	88.55	91.88	97.11	15.8	0	98.06	87.78	95.49	93.57	33.64	86.74	76.3	58.72	7.18	1.32	96.22	92.36	66.77	55.87	94.95	44.69	-5.41	30.06	50.18	63.83	55.26	2.31	41.74	89.35	94.45	90.99	-25.75	65.41	89.79	-2.39	50.12	56.92	92.71	54.75	33.62	92.54	94.24
CP_CDK_INHIBITOR	98.78	5.23	90.3	75.55	0.01	78.73	-2.82	96.29	93.73	99.07	39.56	0.19	97.64	85.69	98.09	91.92	19.86	85.66	89.05	76.39	-0.01	52.18	91.43	90.41	62.99	84	89.69	95.99	12.13	12.15	4.49	29.97	47.14	1.61	86.23	97.35	74.21	81.71	5.8	73.28	78.25	0.11	91.51	28.67	94.21	61.69	62.89	79.53	99.34
CP_TOPOISOMERASE_INHIBITOR	94.63	3.48	81.02	43.14	11.84	87.72	-11.54	92.39	95.75	99.09	91.1	13.48	97.01	81.79	93.52	93.64	39.79	85.52	91.44	90.53	6.11	76.08	90.22	72.15	64.07	92.77	94.41	96.17	47.81	28.06	28.31	74.07	66.52	28.25	81.88	95.79	61.05	95.73	22.67	92.4	83.54	15.14	93.86	57.7	95.19	93.1	94.48	80.29	99.14
KD_UBIQUITIN_SPECIFIC_PEPTIDASES	29.68	-10.14	3.58	-2.23	3.69	0.8	0	99.28	97.92	50.24	-2.29	14.04	96.94	30.8	71.52	96.02	39.37	72.17	97.09	40.08	1.05	8.24	53.06	80.71	69.79	14.04	90.03	85.18	-35.08	69.1	16.91	11.34	90.41	72.76	30.24	85	79.61	80.1	58.33	22.27	-18.94	19.5	41.59	0.87	95.87	23.89	-6.63	5.21	88.6
OE_NFKB_ACTIVATION	92.63	0	4.45	0	-1.69	86.56	0	84.74	68.3	83	0.97	5.01	94.5	43.26	61.77	81.83	48.46	78.17	50.57	65.98	-0.68	1.73	82.55	70.81	49.54	70.9	84.67	62.27	-33.21	49.97	58.02	2.67	73.45	53.77	61.33	68.38	78.15	68.93	48.65	82.25	81.48	22.82	78.26	49.41	68.42	21.9	36.98	69.53	91
CP_JAK_INHIBITOR	97.34	60.45	98.94	56.59	-1.49	66.01	-68.86	90.14	48.82	98.95	11.61	11.35	94.18	40.36	91.36	87.9	60.34	93.68	61.58	44.3	-13.39	35.79	54.93	69.44	42.06	58.99	42.89	84.04	27.96	32.2	13.58	9.5	0.68	3.28	94.13	89.62	86.31	22.46	6.21	74.57	77.43	0	92.4	45.41	88.63	27.38	36.58	59.26	99.68
CP_IMPDH_INHIBITOR	66.34	0.61	73.78	16.9	-3.61	86.01	-78.45	78.58	73.3	99.03	4.94	0.5	93.9	0.94	46.32	29.63	8.12	29.59	47.76	23.53	1.01	15.53	61.44	23.45	12	35.56	99.21	52.42	9.39	5.71	-1.63	6.1	2.55	2.27	55.12	56.34	5.18	50.32	-1.65	80.98	26.04	0.35	78.15	3.51	82.05	18.94	59.85	78.04	94.28
CP_DNA_SYNTHESIS_INHIBITOR	48.9	0.59	41.57	9.69	1.01	28.32	7.15	77.25	67.18	97.8	-0.76	16.73	93.89	63.24	6.92	5.26	17.44	12.19	33.58	19.36	23.33	10.09	91.65	33.97	41.05	79.38	70.04	68.17	0.11	13.33	1.99	0.34	13.37	-0.28	41.29	57.35	6.16	83.64	-4.05	69.68	76.18	34.58	96.75	0.15	88.42	13	76.4	65.2	99.02
KD_A_KINASE_ANCHORING_PROTEINS	82.24	0.01	86.15	3.85	-82.92	94.6	-32.67	68.32	68.43	76.46	1.48	46.8	92.37	36.18	52.39	83.94	36.9	77.72	52.95	67.93	0.95	89.63	53.88	71.79	77.97	89.92	51.84	77.9	43.2	97.51	95.7	73.03	89.94	47.74	83.84	58.54	89.9	77.35	82.04	65.88	81.35	38.15	97.55	11.85	81.11	74.27	48.86	46.19	27.83
CP_NFKB_PATHWAY_INHIBITOR	44.37	0	9.56	0.01	-0.01	52.71	49.48	51.93	18.43	54.26	1.16	4.32	91.33	76.59	75.15	60.32	16.7	55.87	60.46	74.92	-0.01	14.02	89.24	35.87	62.3	31.32	80.1	15.57	-39.84	40.15	23.96	-0.08	41.53	7.09	66.96	61.91	76.96	50.66	2.18	74.33	78.53	0.01	34.76	33.22	63.87	13.8	2.98	59.43	87.25
CP_RIBONUCLEOTIDE_REDUCTASE_INHIBITOR	38.09	0.01	2.74	0.41	-4.63	53.65	-0.09	96.21	47.3	99.07	-0.91	-0.64	90.66	19.68	6.43	19.9	9.98	19.07	2.99	4.26	3.72	5.58	71.12	23.52	2.61	49.3	85.36	39.1	21.49	12.6	-19.92	3.02	17.14	-1.58	49.78	53.39	-0.31	61.46	-4.01	55.36	60.32	12.6	53.39	-0.69	98.06	7.26	3.72	44.79	85.06
KD_PROTEASOME_PATHWAY	68.29	0.01	52.5	0.97	-31.99	49.71	0	41.48	50.64	57.42	13.25	70	90.34	71.12	75.04	47.36	23	81.19	63.13	64.29	9.62	18.08	74.86	51.72	63.23	27.35	86.02	30.29	6.57	42.42	9.11	15.31	45.97	-0.01	54.68	78.43	86.41	66.66	6.85	71.43	63.07	0	54.24	23.16	63.8	55.67	5.95	71.75	91.5
CP_FLT3_INHIBITOR	96.52	73.92	97.18	52.03	0.89	86.5	-97.2	70.44	56.31	40.51	35.5	-1.24	90.2	60.82	73.06	92	11.54	84.69	57.88	80.44	-35.44	47.7	21.27	75.65	27.11	62.83	19.47	72.57	26.62	-16.8	14.61	-0.35	4.72	1.06	78.12	80.69	81.66	58.41	-39.38	74.79	82.67	0.72	83.65	81.55	91.77	59.58	15.25	71.07	89.18
KD_CANONICAL_HIGH_MOBILITY_GROUP_PROTEINS	80.11	0	3.47	0	0.13	14.92	0	72.2	74.34	40.23	6.33	29.41	88.98	26.91	22.66	50.33	48.4	32.65	20.98	43.97	8.84	55.03	23.94	57.82	26.32	61.4	74.19	42.62	27.53	49.29	65.99	18.77	37.55	16.16	39.93	80.02	36.72	33.05	55.95	63.62	21.57	22.48	55.11	19.13	16.82	32.11	17.24	66.63	45.36
KD_GATA_ZINC_FINGER_DOMAIN_CONTAINING	78.17	0.03	7.9	0	-14.66	36.81	-0.16	41.75	20.69	48.01	-2.42	0.56	88.59	80.02	87.69	51.62	33.92	42.51	23.07	57.81	2.36	1.4	60.7	68.21	16.3	46.91	66.1	37.51	0.32	20.54	43.65	2.18	13.26	7.04	33.71	88.81	39.59	10.8	26.12	42.27	42.39	18.07	20.36	19.73	9.78	41.16	33.74	75.08	73.45
CP_HMGCR_INHIBITOR	97.69	2.72	78.77	7.23	-93.22	43.22	-58.29	50.05	94.68	39.96	0.8	0.02	88.22	76.76	90.6	86.14	4.31	79.34	57.11	55.12	-0.33	2.94	4.44	90.84	44.94	1.9	37.31	84.68	7.4	68.38	50.43	4.47	11.7	7.03	24.49	67.45	54.82	68.92	-4.93	52.81	61.88	-0.3	5.32	5.41	45.96	51.11	7.58	80.93	52.85
KD_BMP_SIGNALING	94	0	68.26	0.51	-10.28	74.92	-0.14	53.09	76.03	76.91	12.03	41.25	87.28	80.48	71.77	84.64	32.02	89.25	52.28	59.21	1.63	53.71	51.27	85.64	52.97	67.02	63.08	32.45	26.95	58.2	86.47	0.43	54.9	34.84	43.13	79.19	77.87	78	72.36	68.21	73.68	50.91	84.96	51.97	56.33	57.48	31.5	71.95	81.68
KD_NUCLEOPORIN	79.99	0	23.15	0.01	-0.28	0.98	-0.06	56.38	45.05	68.29	-32.19	20.45	86.47	8.74	18.42	75.98	8.79	84.96	64.17	15.13	2.45	54.42	33.74	72.93	69.62	34.55	67.77	48.3	9.44	63.7	23.82	50.93	26.49	40.08	13.09	72.19	87.11	66.73	40.28	61.53	7.36	-10.36	21.33	6.69	59.7	-4.17	1.32	55.3	50
KD_ALDEHYDE_DEHYDROGENASES	51.01	0.01	16.21	0	-33.54	77.66	-5.93	68.32	44.72	88.84	40.65	-0.56	86.19	60.93	70.32	70.13	35.18	43.3	51.83	46.07	6.32	15.95	60.55	50.57	54.96	75.44	40.03	54.86	11.36	23.86	85.99	38.65	73.73	60.15	26.14	64.85	87.94	72.34	30.72	54.69	92.23	41.18	48.07	7.25	99.56	81.24	52.15	80.35	81.12
KD_LYSINE_ACETYLTRANSFERASES	89.02	0	34.07	0	-29.16	78.55	-0.85	85.19	95.16	92.54	40	8.89	85.14	82.25	91.46	87.7	46.94	87.05	82.23	77.2	16.31	61.38	81.26	87.1	51.54	54.21	97.84	90.98	40.5	67.45	36.51	65.92	71.36	50.58	65.67	81.09	92.35	67.05	41.88	89.97	61.81	1.83	85.02	43.91	88.69	85.02	68.35	86.53	94.6
CP_DNA_DEPENDENT_PROTEIN_KINASE_INHIBITOR	98.84	74.15	98.34	69.73	-0.31	82.23	-98.91	96.58	91.6	49.27	30.83	-79.42	84.54	28.83	96.42	96.49	39.72	98.73	94.31	50.36	-49.43	5.55	23.5	96.27	-3.03	28.74	11.64	93.21	35.04	-1.7	37.42	26.14	-2.29	27.34	32.96	92.4	33.55	65.11	-4.29	85.29	52.48	0.05	61.54	68.87	39.06	54.56	72.36	89.71	87.79
CP_HIF_ACTIVATOR	82.7	0.81	61.55	2.25	-0.01	11.58	-72.55	87.66	17.52	85.31	0.74	4.39	84.07	74.8	61.2	65.51	71.39	37.35	38.3	63.1	5.35	-0.01	85.91	56.31	6.86	2.65	54.74	-14.27	-0.18	-32.66	15.89	-15.59	3.22	-38.39	2.21	56.1	69.56	43.13	-21.72	55.11	61.7	1.82	66.44	92.78	72.58	0.52	-43.65	86.46	82.04
KD_RIBOSOMAL_40S_SUBUNIT	80.86	0	2.08	0	0.48	62.61	0	82.22	91.53	67.26	10.03	8.52	83.7	54.77	54.95	66.17	30.44	73.22	30.76	54.74	4.03	47.34	61.28	58.83	24.97	74.04	75.17	65.52	19.43	54.03	42.53	26.9	73.54	22.72	81.99	81.66	52.35	63.71	65.55	72.63	38.33	72.76	67.4	27.8	72.54	31.97	20.54	74.81	78.56
CP_IKK_INHIBITOR	92.69	73.58	89.4	89.97	-1.29	69.12	-90.24	60.74	47.67	80.8	-14.81	-76.77	82.73	79.02	80.34	58.49	2.76	56.35	51.2	38.75	-2.29	-3.9	76.54	58.42	0.01	17.34	56.55	24.49	6.74	-0.09	44.74	-1.19	-17.88	0.03	44.26	61.39	87.82	53.97	-25.92	52.96	66.85	-0.02	58.87	45	78.43	12.29	-0.92	84.81	76.97
KD_RNA_POLYMERASE_ENZYMES	73.48	0	-0.92	0	0.38	15.31	0.01	83.74	92.13	52.06	1.1	0.34	82.12	35	46.33	40.72	24.22	70.38	44.8	39.17	2.89	28.84	36.89	44.92	8.2	40.71	56	38.41	1.61	20.84	75.18	0.18	61.71	18.78	21.55	75.59	22.28	17.86	68.27	25.87	2.86	13.41	45.11	-5.33	37.47	0.17	14.83	64.95	80
KD_V_TYPE_ATPASES	82.09	0	-4.64	0.01	-0.52	42.35	-28.55	15.61	38.23	64.76	5.89	10.71	81.73	53.2	59.86	83.32	0.2	73.69	3.66	60.51	-0.01	0.22	67.54	-0.34	2.24	17.03	44.64	38.2	-5.41	-11	-8.98	-43.03	10.43	-11.85	-20.24	71.39	41	63.05	-4.68	-12.09	85.21	0.2	60.19	75.48	2.12	24.88	-4.7	86.91	81.71
CP_MTOR_INHIBITOR	98.68	99.53	99.69	98.89	51.87	81.22	-99.73	91.4	92.6	43.78	44.41	-5.1	80.8	67.6	99.2	98.84	54.7	95.06	54.28	80.96	-59.94	0.42	1.15	97.65	-4.82	6.43	7.66	95.72	78.01	-4.61	52.08	39.3	-0.62	85.12	21.05	92.46	79.04	22.59	-0.03	27.34	82.53	-3.3	66.51	97.65	94.94	56.17	92.55	95.92	76.85
CP_PKC_ACTIVATOR	-24.97	-5.84	-47.98	-2.47	-69.47	54.58	-33.04	39.95	-45.38	40.89	-69.29	-5.87	80.59	56.23	53.07	77.74	-18	-0.4	-1.58	32.7	-18.2	-82.09	75.22	-24.07	-0.63	-29.8	72.88	-56.2	-97.31	-72.85	-48.29	-77.86	1.92	-61.12	-39.86	-32.45	1.86	45.69	-65.87	-58.92	49.75	-62.05	-53.1	0.73	58.07	-34.01	-51.31	66.75	18.6
CP_T_TYPE_CALCIUM_CHANNEL_BLOCKER	93.36	1.59	83.53	13.68	-21.26	89.07	-66.15	66.66	64.91	60.81	-3.63	-0.6	80.05	90.71	88.01	66.82	29.61	75.35	43.17	74.42	0.91	-21.66	43.53	88.12	29.69	8.3	62.75	70.4	18.81	17.92	45.34	-0.02	4.17	9.93	55.47	75.73	83.81	53.68	9.53	74.11	57.1	1.03	52.59	68.37	43.25	40.03	31.74	92.21	88
CP_HDAC_INHIBITOR	91.78	0.06	39.19	6.03	-17.14	72.79	-5.5	88.36	74.31	77.01	33.69	-97.99	79.6	44.62	79.54	94.39	9.69	92.12	79.51	39.35	-10.61	10.15	94.46	72.34	0.33	83.91	34.34	83.16	2.22	14.06	74.27	-0.17	9.25	0.02	9.3	46.69	67.07	41.48	-6.73	83.18	48.86	9.84	70.83	82.19	86.29	82.54	26.62	88.87	88.47
OE_HOMEOBOX_GENE	79.92	0	44.47	0.43	0	59.15	-1.46	78.41	77.67	67.34	57.21	2.86	79.56	49.95	65.36	62.67	0.31	57.76	6.94	40.07	-0.09	1.69	22.89	92.91	7.14	13.8	54.79	14.72	0.42	62.44	20.9	15.4	39.23	0.28	60.54	14.36	60.89	65.48	9.99	68.04	83.18	3.45	40.62	52.82	56.99	27.55	51.54	91.17	94.68
KD_DNA_REPLICATION	48.5	0.01	81.66	0	-18.91	69.67	-0.17	43.17	46.97	75.59	18.28	11.78	78.16	61.66	22.87	59.6	22.58	46.57	18.54	45.49	0.19	26.32	42.73	46.35	90.08	25.71	89.06	68.04	0.09	39.46	33.1	5.11	57.27	21.35	57.24	41.01	53.38	95.88	20.63	70.26	34.73	9.49	40.34	0.24	66.57	48.86	39.01	62.74	34.4
KD_C2_DOMAIN_CONTAINING	82.02	-1.2	23.76	-1.02	-57.15	74.2	0.13	80.82	64.02	93.27	-39.62	-4.76	77.95	70.99	80.72	75.69	13.66	75.95	87.91	46.26	-1.77	-25.82	92.1	46.97	30.8	49.47	78.49	29.22	-17.26	-9.05	-88.69	16.55	8.96	-0.72	70.14	33.7	63.33	53.53	22.78	70.58	83.86	-0.11	48.47	45.48	97.51	66.21	-38.59	84.29	89.93
KD_ZINC_FINGERS_RANBP2_TYPE	89.59	4.84	57.92	12.48	-3.14	37.33	-17.06	46.17	43.61	86.21	13.73	33.52	77.45	57.91	47.81	56.31	49.93	46.02	55.15	68.13	4.07	44.44	51.97	63.24	68.35	58.8	77.96	73.8	52.88	49.42	24.22	0.05	31.4	3.51	30.33	71.26	28.37	69.69	18.05	64.25	35	40.13	58.24	60.01	43.09	58.9	14.1	50.71	49.1
CP_PI3K_INHIBITOR	99.27	99.31	99.51	93.65	5.49	82.92	-99.64	91.12	96.39	33.89	47.59	0.65	75.44	52.42	98.58	98.54	35.49	95.62	87.84	75.31	-50.7	0.43	0.72	98	-2.6	8.67	4.78	96.25	68.8	0.81	56.47	10.3	0.4	70.77	15.33	92.85	58.39	15.87	-1.42	58.48	63.89	-0.44	57.14	94.35	85.74	36.49	93.8	93.12	85.59
KD_VESICULAR_TRANSPORT	73.6	1.45	74.61	45.25	1.03	62.51	-9.76	31.89	18.49	66.86	11.37	-0.93	75	89.43	80.66	42.42	21.36	44.79	42.62	61	5.59	2.91	41.54	46.6	49.9	55.34	31.71	2.55	27.18	11.93	19.1	0.65	2.1	35.91	22.34	29.92	83.57	42.08	6.32	48.91	38.59	1.26	43.4	78.66	77.67	65.68	-5.05	93.34	42.84
KD_AKT_SIGNALING	65.29	0	13.43	0	0.02	16.96	-0.01	41.9	49.64	21.49	8.13	4.69	74.67	42.37	30.38	29.34	24.45	59.39	25.12	22.35	2.71	2.09	38.65	55.58	6.83	27.9	44.47	19.7	4.32	24.73	49.32	1.41	17.39	6.24	32.04	71.11	30.85	14.28	19.84	56.93	14.95	8.73	39.85	11.62	31.48	9.07	6.67	52.59	39.87
CP_PROGESTERONE_RECEPTOR_AGONIST	23.46	0	0.35	0.01	-0.22	5.74	-0.16	12.8	41.7	10.72	0.06	0.18	73.72	3.74	22	21.75	6.81	24.59	21.87	20.83	-0.4	6.72	12.87	3.86	18.12	5.15	30.27	7.58	3.3	16.41	11.29	2.34	13.25	6.32	0.4	25.19	22.27	31.37	22.02	10.11	18.32	0.58	0.92	1.29	4.17	1.88	2.18	4.93	2.12
CP_IGF_1_INHIBITOR	99.31	82.77	99.51	63.56	-35.28	87.72	-99.48	76.64	97.94	44	60.41	7.5	73.56	51.46	98.83	98.04	7.52	95.68	71.54	51.63	-61.34	-0.02	1.92	98.46	-19.67	2.25	22.82	82.73	5.46	0.4	58	6.64	4.21	8.77	34.71	96.82	95.2	22.08	-33.62	28.94	46.08	-8.55	34.32	52.11	56.96	24.08	75.97	84.4	56.14
CP_ATP_SYNTHASE_INHIBITOR	80.42	0.78	21.66	3	-5.92	41.11	-6.84	43.05	13.93	48.93	-51.03	-23.74	73.4	77.94	51.17	57.9	16.21	58.6	39.64	48.26	0.71	48.68	63.76	27.2	20.5	41.56	40.86	15.9	54.49	9.39	11.45	-1.11	24.56	2.07	39.07	42.28	73.03	16.14	6.1	39.26	20.74	5.21	17.3	31.84	18.79	3.68	-3.24	42.8	81.92
KD_HEAT_SHOCK_70KDA_PROTEINS	96.21	2.11	67.43	43.93	-2.95	74.27	-0.5	81.74	68.24	84.9	9.64	27.56	73.17	42.1	52.74	71.47	44.21	73.19	32.4	42.16	25.66	71.11	29.74	86.54	70.7	47.83	96.26	62.88	24.5	89.17	68.26	47.31	45.64	43.86	87.98	61.22	66.59	92.02	50.18	76.64	49.09	18.93	55.2	12.6	62.88	65.41	57.7	88.56	65.88
CP_PKC_INHIBITOR	62.5	1.69	64.29	15.95	-0.05	37.61	-88.77	75.87	29.72	42.28	-58.66	0.02	72.78	39.94	-12.73	60.88	2.66	63.53	3.86	36.61	0.3	39.12	14.51	24	43.31	6.92	56.44	6.11	0.39	2.36	5.34	0.34	17.83	-0.8	54.3	86.84	80.77	62.38	-9.22	39.36	15.68	9.83	62.99	5.64	29.08	16.03	3.31	10.11	88.4
KD_MITOCHONDRIAL_COMPLEX_IV	67.88	2.39	18.96	1.68	45.48	80.91	-0.06	24.4	25.28	27.97	0.92	0.79	72.41	81.42	65.35	85.77	41.06	47.89	41.47	11.45	-0.89	0.15	4.68	34.79	1.1	42.46	39.09	20.41	94.71	44.91	89.48	2.63	6.85	85.9	86.86	21.06	28.51	29.8	81.34	50.11	18.83	19.48	47.82	52.71	23.6	33.2	39.07	38.37	26.09
KD_INTEGRIN_SUBUNITS_ALPHA	90.15	0	94.11	0	-0.71	26.89	-0.01	73.16	94.68	37.19	8.21	55.26	69.96	68.7	86.71	82.12	63.53	85.24	60.06	84.03	6.88	38.18	18.95	76.92	32.61	88.49	39.39	73.9	40	38.71	26.01	30.84	26.78	63.74	79.18	97.56	79.3	66.72	37.96	88.22	36.46	26.51	93.95	55.66	16.81	65.25	51.63	54.33	57.02
OE_INTERLEUKINS	59	0.01	23.09	0.36	0.32	55.21	-0.09	50.06	39.28	43.47	0.43	4.03	63.3	50.22	78.08	45.17	22.59	81.9	0.08	63.01	-0.09	41.48	43.6	82.96	45.17	14.77	47.49	31.6	26.16	44.18	38.72	4.65	2.29	3.52	22.12	52.21	5.75	-32.85	19.7	38.25	73.01	13.26	25.94	35.24	73.33	11.26	21.1	18.86	51.65
KD_STRUCTURAL_MAINTENANCE_OF_CHROMOSOMES_PROTEINS	65.57	3.75	94.32	0.09	-1.88	69.3	-2.14	52.38	50.91	48.75	16.93	0.19	58.4	70.11	-3.27	88.22	18.28	52.03	65.83	71.56	13.69	17.69	11.33	78.17	68.92	13.43	59.42	46.16	7.08	66.88	33.87	86.62	49.51	19.38	78.14	65.76	23.7	64.49	8.19	49.75	2.68	0.99	71.91	9.14	34.61	63.83	84.1	47.52	94.94
CP_CALCIUM_CHANNEL_BLOCKER	85.98	0	25.73	0.01	0.16	41.88	-0.01	77.44	80.03	27.61	1.83	0.39	56.16	59.09	45.48	58.44	27.43	63.91	5.28	33.2	-0.16	9.62	13.3	69.13	25.59	2.86	31.95	33.86	40.95	8.12	35.06	-0.11	4.85	-0.23	11.98	51.11	53.57	2.74	-2.37	14.06	58.76	9.4	18.63	7.23	6.02	1.22	3.41	66.99	35.25
OE_PURINERGIC_RECEPTORS_P2Y	74.15	0.03	12.82	1.41	-0.47	20.9	0	72.65	49.66	33.57	2.19	-0.01	54.59	3.39	24.46	12.08	65.22	54.36	2.86	53.69	-0.92	41.07	31.52	50.89	0.31	29.84	26.8	24.44	5.06	26.84	5.05	-0.39	-2.39	16.12	75.21	64.76	10.15	64.72	25.65	76.99	14.43	4.85	57.96	1.97	8.18	14.85	45.75	45.61	30.08
CP_PROTEASOME_INHIBITOR	31.26	47.83	22.92	37.07	-30.19	25.51	57.04	29.11	-5.07	24.48	0.91	2.49	53.54	74.87	9	-14.29	6.49	64.36	72.62	30.36	-3.28	1.92	92.9	8.83	81.83	45.13	75.63	-1.27	-37.31	68.44	50.85	-0.02	65.06	5.23	31.57	-7.71	85.23	63.11	-11.69	86.54	57.18	15.17	4.93	5.07	59.71	-0.01	-59.61	67.19	85.33
KD_MINOR_HISTOCOMPATIBILITY_ANTIGENS	76.01	-0.82	4.25	0	2.24	-8.27	-2.71	67.54	37.92	72.87	-3.57	-33.18	51.38	57.6	-2.24	89.05	0.44	85.79	73.61	32.54	-50.61	-5.52	77.42	38.88	14.24	52.86	57.41	76.05	5.95	10.43	-17.58	-7.78	29	1.95	21.52	57.86	79.87	33.78	32.7	9.97	6.24	-3.26	14.48	16.37	80.09	0.49	-1	36.87	57.08
CP_BCL_INHIBITOR	7.81	0.88	1.6	0.01	0.06	-1.03	-27.66	1.39	-33.57	14.59	-52.81	-0.15	50.43	7.18	2.38	-2.96	0.06	1.82	0.06	2.99	-0.05	-14.24	46.87	5.18	-0.14	-1.83	19.97	-2.37	-0.16	-14.48	-8.78	-3.93	-0.39	-5.3	-0.88	2.3	4.23	7.63	-1.08	-9.2	23.96	-0.06	2.02	0.07	28.63	-14.9	-45.96	71.58	12.81
KD_IL4_PATHWAY	55.55	0	40.37	0	0.53	22.07	-0.01	30.36	52.13	16.66	14.16	20.8	49.52	52.64	37.32	32.24	21.96	60.19	37.49	29.28	1.3	15.11	11.04	34.65	10.06	29.23	44.95	15.33	5.38	17.22	18.24	2.98	23.88	12.85	19.46	52.33	55.12	15.68	21.03	57.4	20.01	6.64	29.87	27.16	17	6.26	5.39	57.13	47.47
CP_PROGESTERONE_RECEPTOR_ANTAGONIST	66.58	0.02	0.03	0.14	-0.01	-0.05	-0.48	11.11	64.85	6.15	0.01	-0.59	44.89	6.54	4.49	13.25	3.51	20.23	20.9	13.27	-1.04	2.54	0.26	54.89	1.84	2.5	22.28	4.49	6.63	10.78	6.37	-0.25	12.88	1.13	10.64	25.44	0.67	0.45	0.73	-8.84	29.62	9.17	5.81	0.5	3.68	0.84	0.41	1.99	25.35
CP_EGFR_INHIBITOR	93.32	46.11	88.08	59.03	-2.26	61.29	-87.9	42.64	67	13.52	0.75	7.1	44.51	68.19	66.79	63.72	18.09	29.85	27.06	55.57	0.01	-1.88	29.59	69.22	20.51	2.39	43.32	18.99	28.16	1.29	9.95	-0.01	-1.29	2.03	7.3	67.85	50.9	11.68	-6.04	56.6	5.9	-0.01	17.99	61.42	-1.92	10.44	8.15	44.81	83.17
CP_TACHYKININ_ANTAGONIST	61.93	0.09	2.51	0.09	-2.72	5.4	-1.84	39.02	9.65	-0.65	-0.14	5.4	43.56	3.39	14.83	0.91	64.67	34.54	-16.59	25.58	-0.4	-12.23	-0.19	22.91	-9.35	-15.73	11.46	14.45	11.35	16.57	22.54	-1.75	27.53	-0.18	17.79	60.9	78.69	15.01	21.88	39.44	1.67	13.56	42.24	-0.9	-11.53	21.08	3.29	6.43	-2.86
CP_BACTERIAL_CELL_WALL_SYNTHESIS_INHIBITOR	42.47	0.24	14.51	3.43	-0.01	9.24	-2.67	61.49	57.47	1.83	-0.68	1.41	43.44	2.14	45.34	20.12	32.39	66.91	3.12	10.58	-0.95	2.18	-0.66	32.5	7.77	4.11	10.94	42.84	6.6	5.86	13.8	2	7.22	16.99	7.31	42.21	6.03	7.83	10.14	17.08	4.28	-0.78	22.49	0.56	1.83	17.51	0.56	8.37	3.85
KD_SMAD_FAMILY	77.74	0	4.43	0.4	13.35	16.75	0	60.5	48.36	24.9	1.24	1.59	42.39	15.49	69.45	54.82	24.11	87.91	72.55	28.86	0.11	43.23	1.61	28.1	18.39	58.32	22.75	70.25	20.18	45.8	52.81	0.44	38.96	21.44	70.05	77.85	29.1	31.61	45.2	61.02	12.12	23.32	85.19	5.25	12.5	51.97	41.9	67.68	37.14
KD_MCM_FAMILY	22.58	0	7.57	0	1.54	59.27	1.81	50.76	18.04	24.41	18.6	18.7	42.29	13.33	33.34	21.48	77.25	39.96	18.35	45.75	14.31	29.46	20.35	44.57	0.9	39.69	23.08	26.85	43.71	42.86	11.56	21.21	0.72	29.1	47.49	38.78	58.75	1.53	22.12	23.22	15.88	2.71	42	62.4	3.23	15.09	4.33	46.35	32.59
CP_PDGFR_KIT_INHIBITOR	95.42	8.8	96.57	0.17	-6.05	77.51	-81.15	33.64	24.14	23.92	15.8	1.55	41.41	55.25	75.81	66.65	9.73	42.95	11.28	20.49	0.01	25.73	0.79	68.11	28.08	19.76	25.68	30.23	10.02	21.42	15.55	18.17	4.45	17.4	65.86	74.2	82.44	53.42	2.38	39.75	48.91	5.48	38.17	9.33	26.57	6.59	7.63	71.65	46.26
CP_PROTEIN_SYNTHESIS_INHIBITOR	76.1	20.21	32.71	14.43	5.63	12.97	-77.31	78.46	21.16	31.37	-45.77	-98.02	39.61	-21.58	44.74	3.33	3.55	7.6	4.93	27.93	-2.32	-0.6	31.98	2.96	-83.46	4.02	48	1.17	1.34	-62.62	48.38	-8.1	-9.04	0.56	46.4	-10.01	39.79	2.03	-48.84	62.71	-0.61	-81.81	-3.82	79.55	90.19	-23.9	-11.44	45.8	59.75
CP_SRC_INHIBITOR	99.16	0.07	95.81	0.02	-93.1	79.03	-41.38	66.92	98.5	19.88	54.9	93.64	39.55	61.09	91.42	79.07	15.64	61.75	61.65	74.5	0.99	20.05	0.94	97.52	40.53	40.95	16.97	82.14	65.2	64.4	55.43	29.89	57.94	29.23	85.12	93.33	50.87	84.43	29.76	90.03	19.28	40.28	80.18	69.28	-23.23	36.2	96.66	88.25	73.73
KD_CYCLINS	64.91	0	7.52	-0.01	-0.38	31.67	-0.14	19.63	36.88	10.31	-27.55	7.5	37.61	32.63	23.49	15.96	23.8	23.69	6.4	68.83	-0.72	4.08	-0.98	52.48	30.17	50.04	33.15	5.14	2.09	3.99	66.5	1.53	8.38	47.31	31.59	27.65	15.79	9.68	60.77	74.18	17.86	42.18	41.39	14.79	5.41	26.6	-44.87	37.96	42.75
CP_PKA_INHIBITOR	56.04	0.3	17.53	0.07	-0.01	0.29	-5.37	25.73	50.2	11.53	1.63	0.7	36.7	12.14	20.26	18.3	18.6	19.8	8.25	32.73	4.06	40.18	10.78	17.97	6.17	15.04	20.02	19.85	28.75	7.32	26.59	1.03	6.52	1.8	11.82	65.01	20.41	12.38	1.36	44.78	17.96	8.56	31.76	24.97	5.18	10.01	44.15	15.37	45.09
CP_THYMIDYLATE_SYNTHASE_INHIBITOR	-16.27	-0.01	-1.44	-0.01	1.66	-5.86	-0.45	6.07	-35.24	16.64	-1.95	-1.07	34.57	-22.5	-28.75	-22	-17.18	-26.52	-2.29	-1.34	-0.15	-1.27	18.15	-45.72	-5.07	3.55	53.76	-14.89	-0.41	-18.83	1.92	-0.7	-6.57	0.3	-4.03	-17.29	-31.12	-0.72	-11.93	-11.09	13.73	-0.97	1.69	-0.07	18.02	-8.51	0.03	-17.2	11.97
CP_HRH1	37.86	0.95	12.41	0.1	-0.26	9.78	-0.32	16.17	14.26	3.98	3.09	10.9	34.51	46.91	34.6	43.62	14.51	49.69	27.88	22.9	-0.02	0.4	54.27	61.49	10.76	3.4	31.33	3.42	33.9	18.01	82.4	0.01	35.31	22.08	6.29	34.61	55.78	8.12	33.23	34.29	6.8	9.91	26.81	19.97	0.14	1.4	6.22	10.74	41.65
CP_GLYCOGEN_SYNTHASE_KINASE_INHIBITOR	15.91	0.03	-3.26	0.07	0.03	3.99	94.43	2.96	-20.92	81.51	-50.22	-0.57	30.54	15.2	-18.04	-3.57	1.71	-5.54	-0.68	-3.85	0.56	46.93	14.07	4.08	76.39	17.2	27.28	-11.87	8.38	4.39	-57.08	2.66	3.66	-0.53	63.33	5.86	13.85	7.97	-0.67	2.67	0.6	0.96	17.69	-3.77	28.64	-10.03	-1.84	2.85	21.62
KD_TOLL_LIKE_RECEPTORS	74.55	9.56	26.28	19.64	7.95	18.94	-0.22	45.47	32.43	16.52	4.12	4.41	30.18	20.41	14.76	8.68	9.78	45.72	13.75	32.61	0.05	60.95	-0.38	8.77	18.14	12.44	33.89	27.16	21.78	39.34	1.21	0.05	7.27	48.05	40.38	45.6	42.39	17.04	52.09	16.83	10.41	4.47	70.16	15.49	6.76	51.76	31.86	67.02	15.96
CP_HIV_PROTEASE_INHIBITOR	-53.22	-0.01	8.21	0.02	27.59	-40.36	1.31	-54.7	-21.78	-42.29	-8.51	1.82	30.08	-5.73	-31.16	-73.2	5.25	-53.43	-51.27	-3.17	-8.5	-30.46	-14.21	-29.8	24.97	77.13	-63.64	-69.59	9.91	-56.66	-13.4	-3.45	-66.46	-43.63	3.51	31.82	-8.12	-94.7	-32.6	16.95	15.89	0.5	11.96	-2.21	-77.24	-27.81	-86.64	43.16	-26.73
KD_HOXL_SUBCLASS_HOMEOBOXES	74.12	0	0.35	0	-1.19	37.14	-0.01	38.64	48.17	51.25	0.75	24.11	29.98	27.13	55.79	37.51	16.13	40.12	29.7	21.21	0	3.92	26.16	32.4	26.85	5.87	71.12	6.99	30.02	56.4	42.1	23.74	40.66	0.6	59.62	74.7	34.97	14.96	43.86	35.33	49.07	21.16	56.33	17	4.57	19.17	30	17.77	31.6
KD_HISTONE_DEACETYLASES	16.34	0	-0.05	0	-0.07	1.19	-0.47	-1.95	21.08	0.1	-1.99	0.01	29.34	5.58	14.12	8.94	0.95	1.18	-2.89	16.55	-4.01	0.07	16.59	11.5	-2.88	3.45	10.16	-6.35	1.35	-0.85	1.91	0.17	3.6	0.91	1.36	54.73	3.7	0.81	2.25	-3.25	5.99	-0.56	0.94	1.76	7.53	3.53	1.62	13.78	68
OE_LIM_CLASS_HOMEOBOXES	37.66	0	8.71	1.15	-0.39	23.02	-9.67	16.46	37.54	12.92	-2.67	-0.73	27.76	30.58	51.55	48.5	-2.52	62.09	-0.74	24.22	-1.88	-2	20.38	84.44	7.6	-4.48	30.14	13.17	-1.88	0.47	-19.82	0.46	49.21	-0.25	0.62	21.08	37.26	44.73	-95.83	1.81	13.66	-20.35	0.35	38.71	48.44	22.64	18.67	60.58	20.64
KD_NKL_SUBCLASS_HOMEOBOXES_AND_PSEUDOGENES	59.51	-0.4	11.46	0.01	-0.75	39.96	0	33.95	34.49	49.13	4.73	12.3	27.44	20.28	9.72	9.61	40.36	18.65	20.37	58.03	-3.35	17.28	49.66	33.65	25.27	66.49	34.67	41.87	-0.95	29.81	5.23	1.42	32.08	6.31	61.16	38.43	61.39	47.34	2.89	68.71	32.08	0.8	30.48	12.71	25.39	-0.36	50.58	46.68	45.48
CP_KCNJ11	6.24	0	57.19	0.01	-0.17	28.12	-0.01	23.95	15.98	21.75	-7.85	1.71	25.72	-1.62	40.24	6	6.96	11.05	14.95	28.38	-1.7	9.31	-3.87	30	35.7	11.25	3.98	46.86	20.26	22.66	69	0.53	6.72	26.33	43.94	73.42	44.2	61.85	34.26	23.83	1.06	1.78	12.75	6.6	14.28	31.52	42.46	8	45.99
KD_INTERLEUKIN_RECEPTORS	60.96	0.01	38.71	0	-0.26	9.46	0	56.96	24.18	28.63	1.08	47.36	25.14	23.33	49.33	46.61	27.53	65.9	69.46	65.59	0.05	35.93	5.78	70.86	70.9	27.85	57.25	43.23	4.22	36.6	41.07	7.24	46.89	13.05	28.57	79.51	61.21	23.09	15.07	79.34	46.49	27.02	47.07	32.68	2.94	21.11	6.6	59.67	56.05
KD_AHSP_PATHWAY	93.66	0.93	71	0.01	-2.97	54.47	-0.55	35.67	61.37	28.5	70.74	6.12	24	21.23	51.88	49.09	16.88	57.7	22.58	24.14	-0.19	15.11	16.3	77.08	14.21	9.4	33.11	39.03	30.52	37.13	61.74	1.27	9.69	9.41	38.77	42.28	45.76	35.68	5.74	40.81	50.5	-0.01	51.79	6.99	48.12	37.41	52.65	51.37	27.32
OE_FOS_TRANSCRIPTION_FACTOR_FAMILY	47.12	-0.15	1.15	-0.01	-21.76	3.64	0	41.51	50.13	8.64	0.82	0.6	23.54	46.13	16.9	28.85	0.33	35.79	41.41	7.08	-0.1	54.37	15.58	26.4	6.71	22.96	34.59	30.31	76.54	20.36	2.48	1.64	64.58	4.52	4.66	59.09	31.92	8.98	0.25	14.25	11.54	2.25	85.28	-2.2	-27.46	50.29	89.37	5.64	9.5
CP_BACTERIAL_DNA_GYRASE_INHIBITOR	54.53	-0.03	-7.33	-0.03	6.17	3.5	0.01	13.87	-9.24	-9.89	3.17	-0.05	23.51	-8.33	25.27	26.47	21.32	33.92	7.66	29.01	2.64	23.75	8.65	1.45	-0.97	1	24.12	6.99	29.01	2.28	17.51	0.73	1.89	49.96	49.23	62.53	-14.4	-5.29	51.43	10.53	14.26	10.51	-2.29	11.28	8.09	0.48	28.07	6.08	-37.69
CP_VEGFR_INHIBITOR	90.27	3.83	77.21	0.82	0.65	14.66	-76.72	33.77	21.78	18.04	-10.78	0.64	22.26	69.22	55.48	55.1	2.14	32.53	7.8	16.71	0.01	8.08	-2.2	68.25	1.25	8.54	0.62	7.43	3.94	-0.66	1.69	9.45	0.19	3.45	49.63	54.3	27.33	31.85	-3.1	33.37	2.84	0.01	2.7	11.28	3.54	10.32	4.76	69.05	42.41
CP_THROMBOXANE_RECEPTOR_ANTAGONIST	61.44	-0.07	-2.05	-0.39	1.93	31.28	1.15	32.42	53.17	10.44	1.09	12.79	22.03	-3.52	29.5	63.78	67.44	35.98	20.3	28.59	15.81	57.46	4.69	55.43	36.62	23.87	12.81	33.17	10.37	35.55	41.78	16.61	71.09	21.08	65.18	62.36	15.95	30.9	66.85	36.44	16.62	9.77	37.22	1.21	-0.99	9.16	15.49	12.56	3.26
CP_GAMMA_SECRETASE_INHIBITOR	30.65	0.01	11.1	0.31	7.01	8.41	0.42	11.65	11.11	12.36	12.48	10.81	21.89	11.51	16.69	9.48	4.79	44.09	13.58	8.79	-0.16	1.73	1.6	6.73	7.14	8.51	51.71	7.81	10.66	17.92	20.92	7.4	17.36	21.57	26.83	16.97	14.79	15.64	20.61	21.92	6.12	11.06	9.63	2.51	7.17	7.01	11.69	17.15	12.02
CP_ANGIOTENSIN_RECEPTOR_ANTAGONIST	24.84	0	0.9	0.05	5.62	17.06	-0.08	16.43	32.03	7.16	7.36	15.7	20.38	22.55	6.28	12.84	37.33	44.92	29.94	33.15	10.41	52.36	0.42	17.01	29.7	20.36	85.95	9.39	43.89	24.36	11.23	9.79	42.23	5.67	74.95	22.37	35.07	28.63	94.67	24.2	27.91	26.79	12.4	4.18	19.11	50.71	30.8	24.33	19.4
KD_TUMOR_NECROSIS_FACTOR_SUPERFAMILY	11.59	0.31	-0.16	-0.08	19.43	-0.37	-0.6	-6.94	64.24	20.71	-11.17	-1.02	19.78	7.69	2.66	11.55	3.03	13.47	1.42	63.52	-0.02	24.94	15.56	22.23	6.28	7.86	72.3	3.73	81.95	15.27	-20.93	-16.22	13.04	0.03	50.39	12.24	24.32	1.87	-2.93	50.43	13.11	-18.01	-3.03	40.42	17.25	-0.8	-0.65	15.34	14.46
CP_ESTROGEN_RECEPTOR_ANTAGONIST	58.63	-0.01	23.04	0.01	-1.84	27.47	-10.02	2.96	35.94	46.91	-0.31	-0.01	15.55	48.19	28.89	14.09	5.63	2.2	-8.69	30.85	-1.28	-5.04	10.55	82.38	4.69	-5.59	35.9	5.8	0.33	2.67	0.57	-0.36	5.8	3.31	15.86	39.61	12.55	28.52	-0.53	62.98	34.1	1.32	4.39	8.9	-0.52	0.14	35.76	7.64	27.05
CP_VITAMIN_D_RECEPTOR_AGONIST	4.89	-0.01	5.92	0.05	0.09	5.57	-0.67	2.65	8.48	17.16	-31.1	1.42	15.44	6.96	8.7	19.05	6.76	-1.2	-8.13	24.68	-4.05	-48.29	-2.11	14.81	0.11	-22.33	22.82	-39.1	3.5	7.82	-13.61	-0.07	8.61	-5.98	-9.54	39.89	3.27	7.69	1	-10.04	-25.63	-6.94	10.67	-7.72	-3.28	-54.86	-1.71	67.39	4.47
CP_DOPAMINE_RECEPTOR_ANTAGONIST	75.6	0.01	2.38	0.01	-0.28	24.92	-2.83	4.28	8.08	5.11	-0.57	0.27	15.36	17.02	42.27	14.47	0.69	7.41	1.09	19.02	-0.08	-0.23	0.77	41.7	0.76	-0.33	3.88	9.6	15.8	16.01	34.59	-0.03	6.19	1.44	5.8	37.95	4.6	16.37	5.96	12.59	6.4	3.56	2.53	1.43	-0.28	7.6	3.23	22.09	10.08
CP_CALMODULIN_ANTAGONIST	49.94	0.57	1.57	1.81	-1.85	66.4	-6.7	54.45	50.06	10.02	-1.36	1.76	14.56	44.03	20.69	37.08	2.74	17.36	11.36	47.3	-6.41	0.48	13	44.09	4.24	-13.63	9.5	-1.61	12.82	9.42	10.94	0.97	5.34	0.57	21.71	38.62	22.02	24.27	0.98	19.47	10.57	6.48	3.67	2.11	-16.44	-6.52	22.06	13.19	41.86
KD_SRY_SEX_DETERMINING_REGION_Y_BOXES	84.32	0	11.59	0	-9.39	29.74	-0.01	81.28	50.24	35.4	2.55	0.84	14.2	26.95	41.33	12.72	-1.49	65.57	32.11	7.97	43.37	-1.24	16.66	42.81	11.74	17.66	24.24	15.61	0.6	13.08	22.99	1.17	44.5	17.81	31.56	41.21	10	12.51	8.71	68.5	5.25	1.9	38.91	12.09	14.41	8.18	65.88	34.77	16.59
CP_POTASSIUM_CHANNEL_BLOCKER	15.49	0.17	32.91	4.19	0.03	25.2	-9.38	0.32	1.52	11.41	-2.7	8.01	13.1	11.71	4.65	3.34	19.32	10.68	-7.49	5.08	-0.22	-1.51	-1.29	4.57	9.33	1.01	21.09	4.58	73.36	0.76	10.19	0.14	-3.15	0.08	17.65	7.5	3.01	4.91	1.39	11.44	0.97	0.16	4.58	-2.07	6.99	1.54	8.66	6.27	6.62
CP_MEK_INHIBITOR	96.79	2	90.72	0.37	-9.16	57.01	-92.14	15.62	93.41	10.89	66.73	85.89	12.99	41.06	34.08	71.53	0.18	4.62	-1.01	24.33	-8.36	2.19	-8.35	56.54	80.1	-7.47	1.03	-0.85	4.52	30.15	10.13	9.72	23.09	10.77	73.27	83.08	19.16	6.91	-59.38	81.4	4.24	0.01	40.8	11.18	11.47	10.48	3.78	72.88	23.62
KD_MEDIATOR_COMPLEX	89.09	0	3.66	0.01	0.72	77.17	-0.07	61.38	48.4	48.12	0	-1.43	12.83	43.35	84.48	35.64	1.08	68.16	56.64	8.21	24.27	4.09	-12.6	67.34	-8.07	26.16	54.76	35.76	12.4	0.25	83.25	2.97	17.34	-19.04	62.61	65.48	-25.35	4.1	8.22	27.56	-6.57	61.15	8.33	7.98	23.77	1.43	25.71	2.97	88.34
CP_ATPASE_INHIBITOR	54.53	4.38	36.19	5.31	12.99	1.97	-61.23	74.3	-13.59	14.77	-35.8	-94.81	11.68	6.1	34.65	-3.47	5.13	49.03	0.16	37.33	-19.4	-8.42	13.37	7.96	-57.42	2.23	19.88	2.6	-3.96	-36.91	12.44	-8.89	7.63	-1.1	18.21	23.54	21.6	11.77	-9.62	11.28	3.71	-53.88	17.73	33.38	32.66	-37.79	-2.51	51.87	56.47
KD_C2_DOMAIN_CONTAINING_PROTEIN_KINASES	44.52	1.03	63.82	2.7	-27.33	9.47	-23.24	-1.6	37.72	-40.57	-21.69	8.47	11.57	-8.98	18.18	-67.23	5.36	-25.59	-65.26	30.81	-10.13	-5.98	-11.46	-33.46	78.38	8.1	-68.98	-2.11	8.59	23.28	26.43	6.35	26.07	-0.48	7.98	31.56	53.88	50.27	11.21	30.26	17.47	-9.02	83.84	43.08	-23.11	32.91	12.61	28.49	22.89
OE_PHOSPHOLIPASES	10	0.01	0.45	0	-24.72	0.76	0.01	11.93	14.43	3.97	9.68	26.26	10.1	1.53	30.51	20.17	-2.55	10.92	1.17	75.28	-10.54	2.79	-3.92	3.92	0.86	7.37	0.44	-4.84	4.69	18.25	10.03	0.6	0.42	0.68	11.93	5.4	0.72	8.32	8.42	23.77	30.45	63.99	7.04	45.39	56.12	16.59	7.81	21.95	-0.43
CP_DNA_POLYMERASE_INHIBITOR	47.89	0	7.38	-0.01	0.06	47.75	0.03	7.61	-4.46	-2.05	2.89	0.16	9.42	38.47	7.12	-27.54	2.39	-8.52	-21.21	6.36	-1.82	9.51	0.49	11.66	8.53	9.95	-5.22	-19.85	6.96	8.14	18.72	-2.94	4.38	4.81	35.3	-20.54	-10.36	10.56	14.56	-2.24	3.66	-1.38	4.38	2.73	-13.09	-4.71	4.28	-2.71	6.02
KD_EIF_PROTEINS	23.29	8.91	10.07	2.71	42.65	-30.61	-24.54	29.94	-23.93	33.77	-1.02	0.01	9.01	39.28	-33.95	27.38	4.94	48.92	-28.85	35.44	0.43	42.73	10.71	49.72	14.18	19.33	18.3	-22.29	7.7	0.6	-4.09	6.83	-26.31	0.55	26.48	2.7	5.19	3.5	39.08	32.65	-12.58	1.98	12.25	1.18	0.08	-7.14	0.07	28.43	-6.69
OE_SIRTUINS	6.26	0	7.22	0	0.14	12.07	-0.72	2.74	1.57	0.01	-4.04	-1.58	8.79	-0.65	1.64	3.43	13.32	15.22	-1.35	3.32	-0.15	0.25	-1.05	-1.17	0.01	4.44	1.38	-0.28	0.26	21.41	1.1	-3.35	1.38	-0.02	3.32	6.76	12.62	2.71	1.58	6.04	0.01	1.53	12.88	2.06	2.22	26.63	-0.27	-0.42	8.97
KD_PROTEIN_PHOSPHATASE_CATALYTIC_SUBUNITS	4.57	0	7.57	0.01	-34.95	22.69	-56.06	-1.38	-1.66	6.86	0.01	-0.63	8.18	32.98	3.68	10.91	0.39	-1.27	-2.73	0.49	0.81	-5.81	-0.07	1.51	-0.42	5.75	5.47	-1.69	-0.47	-8.5	-13.95	0.45	4.55	1.05	1.35	18.52	0.38	6.14	-0.61	-5.84	16.89	-2.4	4.08	-0.03	-2.12	0.01	-0.47	9.42	1.84
KD_RHO_GTPASE_ACTIVATING_PROTEINS	47.57	-0.3	7.3	-0.17	9.61	55.09	-16.92	51.13	22.61	33.79	-13.49	0.74	8.17	54.76	36.03	32.38	8.23	30.52	30.99	31.04	-17.53	6.81	37.12	83.87	25.14	10.84	78.16	42.63	1.51	56.11	26.88	1.77	48.24	0.07	41.3	44.6	43.26	47.11	-12.06	20.77	28.94	-7.69	13.48	-2.55	87.15	40.57	34.88	55.73	19.72
CP_RETINOID_RECEPTOR_AGONIST	1.79	-0.01	2.89	0.1	-0.28	2.53	-0.14	2.73	-19.68	1.98	-13.51	3.66	8.09	-1.89	-4.77	-13.21	1.64	-24.16	-0.97	4.15	0.26	0.14	3.44	-1.07	2.84	4.06	3.04	-7.71	1.59	-2.38	0.26	1.37	6.93	0.78	11.14	4.87	2.45	48.73	1.11	3.07	7.53	0.1	17.61	0.78	-4.04	-19.96	1.04	-1.95	1.72
OE_SUPRESSORS_OF_CYTOKINE_SIGNALING	4.29	-0.16	-1.43	-0.43	0.6	1.1	5.93	13.7	1.35	0.58	0.24	10.41	7.7	-12.34	14.07	9.68	20.29	10.38	-3.31	60.94	-0.13	16.55	1.73	-1.05	14.36	-1.15	10.56	1.91	17.91	0.21	1.91	0	4.83	0.49	1.98	2.05	16.19	24.59	2.08	-4.62	0.9	3.32	22.89	0.33	28.55	0.73	53.94	4.98	-2.19
CP_STEROL_DEMETHYLASE_INHIBITOR	-22.57	-0.58	-0.95	-0.19	-0.21	-0.28	-0.33	-18.07	-27.18	-10.41	-44.38	2.57	7.25	-4.11	-20.89	8.3	-0.65	-21.06	-4.11	-28	-2.88	0.34	-41.83	29.16	36.76	10.28	0.95	-51.53	15.82	19.55	-7.03	7.96	39.9	1.95	23.33	-86.53	7.03	10.33	6.45	-8.96	2.43	-8.21	-31.11	-2.98	-4.93	-57.24	5.34	5.3	2.26
CP_TRICYCLIC_ANTIDEPRESSANT	91.62	0.02	29.32	0.32	-0.31	58.62	-4.43	41.07	58.83	0.77	-1.02	2.7	7.02	4	88.7	36.61	4.83	45.22	9.09	45.22	-3.24	-1.87	-1.99	68.5	34.72	-2.77	33.4	50.75	43.24	0.97	60.5	-0.19	1.9	0.14	1.27	56.25	13.89	41.61	10.84	6.42	3.15	13.2	5.79	1.76	-9.39	15.05	36.67	18.73	4.29
CP_AURORA_KINASE_INHIBITOR	85.12	1.84	46.45	0.24	-0.13	4.73	-75.65	8	43.07	0.95	2.52	-5.96	6.75	9.73	35.24	72.3	0.44	40.81	1.32	4.88	0.01	0.72	0.23	55.18	-0.11	11.61	3.69	4.78	-3.25	-1.46	25.68	0.66	0.86	0.8	17.04	34.9	4.99	44.46	-71.12	9.31	5.57	-0.27	5.85	13.44	44.27	5.22	8.76	54.31	53.49
CP_RHO_ASSOCIATED_KINASE_INHIBITOR	20.34	0.19	-0.32	0.32	-2.56	-2.89	-6.25	7.46	16.59	11.58	3.47	2.37	6.19	14.06	1.13	2.77	-1.7	29.89	-2.24	27.23	3.89	6.01	5.93	11.38	9.87	40.28	4.37	6.75	6.82	18.74	8.2	-1.36	10.67	6.46	42.18	5.79	9.27	6.67	14.09	42.05	-4.16	-5.81	8.53	4.38	-24.13	8.36	9.38	30.98	-9.53
CP_GLUCOCORTICOID_RECEPTOR_AGONIST	1.6	0.01	-0.36	0.01	-21.92	1.99	-0.57	-2.1	1.81	-0.44	-0.24	0.42	5.6	-0.61	-4.21	-1.97	-5.13	-7.95	-0.75	3.68	-8.01	-0.44	-34.43	-5.16	11.01	-38.57	-10.74	-3.91	-6.94	14.53	-3.15	-0.13	6.19	-0.57	10.23	-1.3	-3.06	52.61	-8.18	0.53	-0.33	-24.37	-3.91	-1.53	-3.43	1.41	-0.66	-0.69	-2.24
CP_BROMODOMAIN_INHIBITOR	91.68	59.07	89.87	28.27	-0.41	13.88	-97.33	42.01	57.41	6.03	5.1	-98.44	4.85	9.4	58.73	65.54	0.93	98.06	75.42	-0.35	-90.16	15.11	0.24	87.52	-29.16	11.1	-13.5	71.82	9.3	-43.52	16.06	-38.78	-93.15	-3.73	7.3	67.32	-3.28	0.3	-83.1	17.68	27.66	-45.51	8.05	14.84	0.36	9.82	9.61	39.56	33.87
CP_LEUCINE_RICH_REPEAT_KINASE_INHIBITOR	32.7	5.04	3.57	2.31	-7.31	4.12	-31.73	14.83	1.1	7.53	-2.82	-99.16	4.22	-1.1	-6.47	4.87	-45.14	71.11	51.73	-45.96	-96.98	17.85	-0.63	15.4	-9.35	3.43	-4.67	21.07	-49.84	-49.36	12.25	-93.6	-85.7	-13.77	-3.14	-0.6	-8.55	-0.59	-96.98	7.22	24.01	-71.29	2.05	0.63	-2.94	1.76	-37.48	2.47	17.6
CP_TGF_BETA_RECEPTOR_INHIBITOR	11.93	0	-19.82	0.01	-0.25	63.99	-11.56	22.99	-23.55	7.86	-11.15	48.44	3.96	7.59	-17.61	-88.15	-4.18	-46.76	-7.89	29.4	-0.11	63.17	-17.97	-75.24	23.69	6.4	3.42	-12.31	30.61	21.39	-19.83	1.96	6.17	3.91	19.03	14.18	-18.19	33.4	7.38	5.53	1.14	-5.15	12.28	6.98	-17.74	-3.15	2.35	9.98	-16.15
CP_GABA_RECEPTOR_ANTAGONIST	4.62	0.01	-9.58	0	-1.43	-22.98	-0.05	-17.15	-15.58	-24.12	-0.35	6.83	3.4	-6.23	-11.82	-35.9	-25.07	-4.36	-14.17	3.06	-0.06	6.65	-11.16	20.2	-4.89	-7.11	1.56	-13.35	10.66	4.38	5.46	-3.11	-4.6	4.37	1.73	4.78	-27.54	-17.72	10.13	6.89	-19.54	0.23	-8.43	-6.18	-0.75	-13.04	-2.09	-4.95	-11.09
KD_GENERAL_TRANSCRIPTION_FACTORS_GROUP_1	3.69	0.57	-0.57	0.61	0.05	19.1	-0.03	-19.21	-3.11	-31.7	-2.66	-0.01	3.32	-2.11	-2.01	2.83	0.88	-37.31	-17.56	24.28	-28.45	-11.83	-2.58	6.09	-30.35	9.05	-26.92	-20.89	-0.56	-1.99	-14.21	-1.87	5.34	-0.09	-0.36	-17.18	-5.65	-31.69	-10.7	-14.27	-8.62	-2.5	-0.08	-34.56	-73.31	-0.08	-15.57	-9.78	14.72
CP_IMIDAZOLINE_LIGAND	13.16	3.49	1.14	70.92	-2.69	2.37	-0.97	6.59	-42.1	3.46	-0.02	10.7	3.2	24.32	-41.96	-7.39	0.36	10.46	3	10.48	-8.08	25.81	-28.83	-23.58	-31.95	-2.99	-32.59	3.99	0.27	49.45	-0.52	-6.34	12.39	12.3	14	-54.82	-54.06	33.65	-9.25	12.74	0.26	1.55	12.85	-8.3	-12.94	2.59	20.79	14.46	-25.73
CP_RAF_INHIBITOR	91.58	22.36	87.09	3.62	-0.3	32.28	-96.76	30.66	72.9	0.21	23.06	0.01	2.66	2.38	56.07	73.46	3	21	0.78	15.52	0.01	2.74	2.88	52.34	7.26	12.03	16.93	13.09	12.07	1.58	11.77	9.63	0.17	0.78	68.95	69.97	16.94	28.1	-0.38	51.58	47.63	0.01	20.3	26.17	37.7	5.35	3.13	77.79	34.24
CP_POTASSIUM_CHANNEL_ACTIVATOR	1.47	0	0.22	-0.02	-0.06	-5.97	0.08	-2.9	4.29	-0.52	2.82	0.89	1.93	-1.06	0.48	-1.46	2.58	2.92	1.38	-0.4	1.92	4.93	-5.47	4.51	3.53	0.56	2.18	-1.92	1.93	7.18	6.11	-0.08	0.66	1.24	6.22	-2.82	0.56	4.49	1.23	-1.74	4	0.05	0.7	2.61	-4.64	2.36	1.65	2.11	1.83
CP_SEROTONIN_RECEPTOR_ANTAGONIST	46.26	0.01	7.11	0.01	-0.64	26.42	-0.16	1.23	45.51	2.79	-0.98	2.09	1.59	4.52	18.5	3.88	3.5	18.86	-0.95	16.12	-0.08	-0.36	0.7	24.89	2.09	-1.78	9.72	3.07	24.74	1.18	29.13	0.01	8.83	1.13	2.5	53.01	9.28	7.55	3.43	29.62	2.51	2.09	2.75	2.74	-0.5	4.01	3.07	2.13	11.57
KD_BACULOVIRAL_IAP_REPEAT_DOMAIN_CONTAINING	19.5	0	0.34	0	-1.68	-0.15	-11	10.97	26.53	5.77	-0.31	27.46	1.3	7.91	7.42	-6.27	-3.53	21.87	0.34	30.38	0.64	4.97	1.87	11.02	42.54	15.4	12.87	43.68	0.94	30.16	7.34	0.61	43.9	-12.26	4.33	10.81	15.22	21.96	-21.18	44.15	-0.47	1.43	5.36	-3.57	2.7	12.39	7.36	8.26	6.39
KD_GENERAL_TRANSCRIPTION_FACTORS_GROUP_2	14.54	-0.01	-1.13	-0.01	1.97	0.09	-0.76	-1.9	3.61	2.51	34.46	0.06	0.93	18.28	0.45	-2.27	0.72	-1.29	-5.83	0.75	45.93	0.45	-0.18	-0.59	3.18	0.92	1.57	-5.46	3.9	4.46	33.78	0.06	0.06	3.78	19.43	-0.77	-0.73	7.4	0.78	2.21	-1.75	1.39	0.02	0.43	6.05	-0.73	14.07	18.51	-0.4
OE_LIPOCALINS	-0.78	0.02	-1.11	-0.02	-13.47	-0.35	-8.26	-0.39	0.19	1.07	-2.25	8.17	0.9	0.16	-18.4	-8.59	-0.32	2.83	-0.16	0.77	-0.24	8.99	-5.51	-0.33	2.75	0.32	-4.38	-19.38	-0.22	2.75	0.35	-0.19	11.37	8.55	10.28	0.39	-1.31	20.46	-1.57	2.35	-2.39	0.42	-1.94	-33.75	-1.19	-0.8	-10.83	-22.26	-10.52
OE_SERINE_PROTEASES	43.85	0	0.81	0.01	-2.34	22.47	-0.75	0.19	-11.43	1.78	-21.59	-2.9	0.73	0.75	10.85	-2.02	-22.02	7.53	3.57	-7.52	-49.16	-3.03	-5.01	12.77	17.88	1.68	0.79	-47.77	-3.36	1.68	43.02	-71.01	-0.16	-32.27	0.95	27.42	-5.05	32.12	-0.16	2.93	9.18	-1.51	-0.7	0.63	31.05	1.6	1.03	27.85	-31.81
CP_NUCLEOPHOSMIN_INHIBITOR	0.51	0.01	0.31	-0.01	0.22	9.38	0.05	-1.41	-0.89	-8.74	14.15	-0.2	-0.5	0.99	-15.39	2.76	0.06	-2.37	-2.98	40.52	-0.16	-0.02	-1.64	10.36	0.47	1.25	4.48	0.55	0.07	36.18	-3.12	0.06	-11.21	4.39	5.31	11.51	1.74	1.65	18.52	1.93	0.76	0.07	-4.25	0.41	3.14	0.89	3.84	19.38	14.46
CP_ESTROGEN_RECEPTOR_AGONIST	-3.12	0	-0.64	-0.01	0.52	-0.98	0.13	-2.05	1.67	-1.51	0.31	0.11	-1.3	-0.41	-2.85	-1.72	-0.22	1.91	-1.2	3.64	-0.14	4.77	-6.34	-4.02	-1.04	0.28	3.44	0.33	0.14	-1.71	-0.18	0.21	1.35	1.44	1.08	5.87	1.71	3.67	4.49	-0.66	0.1	0.53	-0.85	-0.79	0.9	0.92	-0.23	2.04	-3.73
KD_AMINOACYL_TRNA_SYNTHETASES_CLASS_II	35.9	11.56	31.37	1.84	-2.15	3.84	-79.35	7.54	11.72	0.3	-4.77	6.06	-1.33	2.01	11.48	2.27	1.86	15.64	-0.08	23.52	-2.04	14.72	-0.28	-0.28	8.93	31.39	-1.44	11.04	17.23	1.77	6.9	-0.09	0.41	39.29	35.98	27.38	2.8	2.48	1.31	0.54	0.6	0	18.9	0.13	0.98	-9.26	-0.16	2.39	0.99
CP_PARP_INHIBITOR	-7.6	0.05	1.91	-0.07	-2	2.98	-1.05	3.9	5.77	10.78	-0.3	-1.63	-2.02	1.8	1.25	5	-1.15	-5.63	-0.83	-4.24	2.98	2.16	10.64	2.38	-2.19	4.56	1.8	-5.74	4.22	1.93	-8.84	1.38	0.31	-0.73	3.9	3	-32.73	9.53	1.27	-4.75	-3.65	0.89	5.77	-0.71	5.07	0.95	0.75	1.52	4.61
CP_REVERSE_TRANSCRIPTASE_INHIBITOR	5.71	0.26	-7.79	0.19	-0.02	-1.27	-0.08	1.62	-6.69	2.54	-0.01	3.89	-2.14	5.75	5.79	-13.67	-10.48	-4.18	-11.18	74.57	-1.28	-2.93	0.1	4.65	12.02	5.73	4.13	-17.03	9.89	21.38	3.59	21.8	-1.5	6	3.6	-2.12	-21.43	64.62	14.66	8.36	1.03	-0.01	3.47	0.77	1.13	-14.91	3.47	9.91	-4.48
CP_CANNABINOID_RECEPTOR_AGONIST	2.3	-0.01	0.88	0.01	-0.06	-3.01	-0.4	2.32	-4.75	2.4	-0.74	0.39	-2.32	2.65	-4.68	9.7	0.61	0.38	-1.82	0.17	-6.18	-0.39	-1.31	-2.73	-0.05	-0.23	-9.54	-6.73	3.03	2.3	-3.79	1.21	-2.72	0.2	4.95	2.34	-7.03	14.62	-3.95	-0.06	-0.62	-0.03	0.07	-0.11	-0.08	-1.23	-1.22	3.16	-0.23
CP_PPAR_RECEPTOR_AGONIST	-12.94	-0.1	-6.08	-0.19	-2.92	-0.47	1.27	-2.02	-6.42	2.26	-8.2	4.33	-2.44	-3.83	-40.95	-10.05	-0.51	-2.24	-17.67	1.87	0.09	1.02	0.92	-3.47	7.46	-1.82	5.33	-13.68	-1.23	19.49	-1.41	-0.53	2.74	4.2	5.34	-2.05	-18.21	1.87	0.86	-1.03	-5.32	-1.54	-0.79	-14.84	-2.52	-22.36	0.37	-5.28	-2.07
KD_KRUPPEL_LIKE_TRANSCRIPTION_FACTORS	2.52	-0.03	-6.37	0	-0.01	13.74	-0.05	22.58	-37.16	-8.69	11.82	18.33	-2.58	5.83	-0.72	-3.62	0.25	-4.32	-3.26	13.57	-15.17	-0.46	-3.54	29.93	-9.44	-1.22	-18.03	-27.01	4.04	3.37	21.02	0.49	2.32	32.94	-0.55	-13.63	0.6	16.58	-0.24	-14	2.82	17.09	0.47	13.3	-1.23	-4.64	-0.65	42.54	-1.65
CP_CCK_RECEPTOR_ANTAGONIST	-51.2	0.01	0.75	4.41	-5.09	1.25	-0.52	-21.73	-11.04	1.01	0.06	-6.32	-2.65	0.69	-11.74	14.69	-0.57	-6.42	1.47	41.81	-11.58	10.66	14.34	-4.93	9.39	2.43	1.32	-10.37	-2.52	-14.45	-0.88	-3.38	13.15	4.14	3.22	-3.67	-4.03	7.85	-47.46	-8.95	8.99	1.67	-0.52	1.36	47.03	1.49	-0.83	-3.23	6
CP_BETA_ADRENERGIC_RECEPTOR_AGONIST	1.83	-0.01	-12.5	0.05	-0.19	1.45	0.91	-5.24	-8.17	-4.92	-0.4	2.57	-2.75	-0.65	-8.5	-34.07	0.15	-5.17	-1	5.92	0.16	0.19	-2.04	1.36	1.09	2.78	-3.82	-8.89	2.3	-4.81	1.75	-0.64	0.84	1.6	2.3	-2.21	-1.71	2.62	-0.23	2.22	1.09	0.02	0.6	0.1	-7.88	-4.34	2.52	10.29	-8.41
CP_P38_MAPK_INHIBITOR	30.78	0	3.28	0.02	0.03	11.66	0	42.4	15.37	3.13	4.54	0.11	-3.06	12.87	-7.5	9.32	3.74	6.63	-1.04	12.87	0.87	16.77	-0.96	3.16	0.74	9.07	0.43	-4.52	23.7	-0.53	-6.8	-0.97	-0.7	0.52	4.75	23.38	-3.02	-0.53	3.05	4.47	-0.45	0.34	4.33	2.8	2.76	13.76	14.72	2.98	3.16
CP_NUCLEOSIDE_REVERSE_TRANSCRIPTASE_INHIBITOR	0.97	0	0.61	1.64	-11.53	3.86	-0.77	5.59	8.75	6.3	3.73	-0.53	-3.73	14.31	6.52	9.74	1.77	-14.26	10.69	38.58	-7.82	9.31	-1.05	7.35	1.72	-13.37	3.73	5.74	12.61	1.47	6.12	24.85	33.69	20.95	-27.41	9.44	20.34	13.6	10.19	15.07	9.03	3.32	1.42	4.79	-10.36	11.01	9.08	5.25	-1.57
CP_SEROTONIN_RECEPTOR_AGONIST	-1.71	1.4	-2.14	0.07	0.03	-3.62	-0.26	-5.94	-7.03	-22.73	-2.73	-0.79	-3.76	-0.33	-2.15	-0.31	-0.27	-6.6	1.99	9.25	-7.3	-0.52	-5.14	-9.98	-16.47	-8.14	-1.92	-4.48	12.15	-4.12	-15.47	-2.41	1.69	-1.44	-1.24	0.61	-5.27	-10.09	-3.11	-2.45	-3.11	-4.58	-1.06	-0.03	-2.16	-0.94	1.82	2.1	-2.61
CP_NOREPINEPHRINE_REPUTAKE_INHIBITOR	3.87	0.17	2.08	0.25	-0.3	1.23	-14.47	-2.56	-3.71	-17.1	-1.68	-0.07	-3.98	1.66	5.4	20.83	0.47	42.68	-4.91	16.2	-1.26	-27.91	-6.27	3.94	1.14	-31.13	-7.79	9.88	13.79	-2.75	8.39	-3.02	-11.75	-1.23	0.32	1.41	0.66	-0.77	-3.25	0.08	0.52	2.33	-2.27	0.87	-81.98	-1.35	1.35	0.55	-1.94
KD_XLMR_GROUP_1	6.93	0.26	5.46	0.88	-0.02	-1.57	-4.97	-0.63	-8.45	5.11	6.71	0.38	-4.09	33.19	17.63	-15.51	-2.46	-0.25	-19.3	0.39	1.76	-1.41	0.51	4.48	1.53	-66.5	-2.44	-33.23	-3.54	-3.03	1.23	-0.15	1.23	3.25	48.21	10.54	3.57	-3.97	21.76	4.66	-3.26	4.04	1.09	-4.39	0.13	0.84	0.16	85.22	-0.18
CP_AROMATASE_INHIBITOR	-1.06	-0.01	-1.15	0.06	13.46	-2.71	0.47	-10.81	11.68	-4.75	-4.63	7.32	-6.51	-14.02	9.55	1.05	0.08	3.36	8.73	6.49	-11.96	5.56	10.69	-3.26	0.28	-8.94	52.6	-10.24	-17.84	-0.51	-19.25	-0.52	0.36	2.05	1.69	-1.03	3.21	-7.47	2.05	2.09	2.64	-0.6	1.87	1.19	-11.52	-0.74	-0.34	1.45	4.41
CP_HSP_INHIBITOR	58.77	2.81	30.78	0.69	-0.01	12.71	-52.76	-5.14	21.14	-0.99	-0.07	63.91	-7.1	53.72	11.11	4.45	2.66	55.58	29.71	7.47	-0.27	-2.55	-21.1	38.43	83.77	-7.96	9.42	-2.91	-24	52.73	27.69	5.95	8.83	-0.06	71.57	-41.05	32.37	8.46	-49.07	28.2	31.83	-15.52	12.68	18.52	7.91	-1.49	-19.52	26.17	17.56
OE_TARGETS_OF_VEGFR_INHIBITORS	-80.55	0	-0.33	-2.75	-1.09	-0.79	1.36	-38.63	-41.25	-23.76	-0.33	-50.09	-8.15	-1.29	-66.1	-58.27	-6.79	-10.25	-21.07	4.06	2.11	-6.45	-9.4	-3.39	-23.56	-60.54	-10.07	-58.27	-9.31	-11.52	-81.44	-0.07	-33.41	-7.46	-46.61	-6.18	-8.54	-7.35	-7.59	-73.12	22.02	-4.28	-23.64	4.71	48.01	-4.19	67.56	-5.66	-25.66
CP_SIGMA_RECEPTOR_ANTAGONIST	26.01	-0.01	-3.31	0.01	-0.85	4.13	1.26	6.34	-17.73	-16.11	-6.14	46.01	-9.25	0.8	17.5	8.07	-10.16	5.04	-32.17	7.06	12.24	-3.97	-20.6	20.44	24.64	5.72	14.07	-49.96	7.71	2.88	31.66	11.18	37.68	-1.28	-9.88	28.07	8.08	36.36	12.98	9.44	30.43	33.05	6.38	-0.8	-0.14	13.17	14.35	-0.77	-34.06
CP_ANDROGEN_RECEPTOR_MODULATOR	3.82	0	0.23	0	-0.67	0.36	-0.18	2.83	-2.63	-0.57	-0.25	-0.63	-9.81	9.91	1.46	-1.92	3.21	1.46	12.22	2.59	-2.7	-0.88	-0.68	1.67	-2.67	-7.44	3.78	1.48	0.28	-10.28	14.93	0.59	-5.86	0.65	0.34	0.43	-0.3	6.49	-13.39	-11.31	1.29	0.75	-22.78	0.22	3.5	0.77	-0.51	2.49	4.63
OE_NADH_UBIQUINONE_OXIDOREDUCTASE_CORE_SUBUNITS	4.89	0	-0.91	0	4.19	15.59	-13.1	-11.59	-12.08	35.18	-5.12	0	-9.9	0.58	-9.16	-8.84	-1.06	11.22	2.82	16.28	-2.04	-12.28	6.21	13.31	11.86	54.02	-6.25	-12.58	15.48	-35.41	2.22	0.17	7.77	20.88	22.95	5.41	12.52	2.11	25.13	-22.79	-1.86	-5.46	11.94	-5.8	2.46	-5.14	1.01	15.31	10.76
CP_NA_K_CL_TRANSPORTER_INHIBITOR	4.84	0	-8.94	-1.07	0.78	3.41	0.28	13.41	-9.43	17.41	0.57	1.13	-11.39	1.67	4.12	6.27	0.38	-7.34	-9.7	26.48	-1.77	-1.5	-17.9	41.57	-2.6	-3.74	-12.91	-26.62	13.81	9.1	6.83	9.18	-1.68	-0.22	-1.54	-7.39	0.63	-39.06	37	19.79	2.51	2.61	-11.96	-1.56	-8.65	-49.37	1.35	8.11	-6.35
KD_POLY_ADP_RIBOSE_POLYMERASES	-16.23	0	1.28	-2.28	-41.08	0.61	-0.33	-9.77	-15.42	0.66	-1.89	0.27	-13.64	-37.41	0.58	-22.67	-14.27	-19.28	-13.95	-40.63	-0.25	-4.53	-3.3	2.77	4.49	-80.41	-7.51	-21.41	17.26	-10.76	-52.32	0.58	-18.13	-0.26	-4.78	-24.42	17.61	0.27	-73.55	-31.22	-0.4	-8.15	-6.59	-58.8	-0.94	-37.4	-47.33	-12.66	7.26
KD_G2_M_CHECKPOINT	16.01	0.13	7.93	0.03	0.02	5.42	-0.01	-2.05	-3.55	1.39	-0.01	1.11	-15.85	1.34	5.69	5.34	1.72	0.63	0.86	3.49	0.03	1.24	-1.69	0.03	-0.03	2.64	0.43	1.71	0.46	7.04	11.13	0.02	0.03	3.69	40.58	4	0.17	0.77	0.45	15.32	1.36	-0.06	20.72	-0.09	-1.28	-0.43	5.24	3.95	4.42
KD_APOLIPOPROTEINS	-71.22	-0.4	-59.32	0	7.94	1.54	0	-10.92	-47.21	-5.3	0.76	-30.32	-17.48	-1.1	-7.19	2.66	0.3	-9.66	-45.38	-2.07	21.04	-18.9	1.85	-1.42	-43.71	2.97	-15.06	-22.19	-21.71	-11.64	-1.87	-0.12	-8.9	0	-2.3	-11.6	-14.17	-61.25	18.89	-49.39	1.7	0.68	-85.19	-6.02	0.22	-8.74	-28.82	18.73	11.75
KD_CYCLIN_DEPENDENT_KINASES	-17.27	0	-3.5	0.23	-0.25	7.32	-0.01	-28.23	-35.74	8.81	-0.51	-3.59	-18.49	-0.82	5.66	-8.75	0.08	-4.86	-0.05	-0.4	-2.95	-5.29	-0.55	-2.71	-0.44	-2.21	-2.33	-33.39	0.24	-20.82	-1.41	-1.17	1.08	-0.55	1.25	-5.76	-7.88	2.35	-5.1	-4.03	-0.35	-0.3	-6.47	-1.67	0.07	-1.02	-0.05	5.4	10.19
KD_TRACE_AMINE_RECEPTORS	-9.14	-0.72	-29.92	-1.31	4.94	-1.85	-0.08	-32.45	-19.36	-0.26	2.05	-10.78	-26.32	0.28	-16.72	-19.78	-11.8	1.9	-19.77	32.32	-3.75	2.13	-4.34	-8.96	-18.76	1.37	-11.15	-28.5	7.7	-37.68	24.59	-1.83	-9.01	-1.91	1.51	-7.19	-21.85	-20.21	-9.14	-26.33	-3.64	0.25	-25.2	4.41	-29.32	1.97	-3.73	-24.65	-8.96
CP_ADENOSINE_RECEPTOR_AGONIST	2.69	0.01	-29.7	-0.14	-0.58	3.15	2.79	4.97	-6.63	-20.62	-1.34	3.33	-26.37	0.24	-8.25	-6.38	-22.39	4.33	-5.47	-3.5	-0.05	6.57	-20.6	2.16	1.19	3.53	4.18	-26.03	1.37	2.28	8.92	-2.01	24.62	4.72	3.39	-2.56	-11.16	8.82	2.97	2.71	-5.88	-0.95	-17.44	-0.45	-65.92	-4.91	-16.15	7.76	-2.89
CP_TUBULIN_INHIBITOR	-50.23	-0.01	-76.31	-8.16	34.36	5.28	6.42	-11.32	-78.55	-87.23	-35.03	-60.88	-36.37	-34.61	-7.02	-26.42	-1.1	-39.87	-18.37	-71.56	-2.46	-4.44	-81.93	-17.16	-41.81	-17.21	10.01	-67.84	-97.44	1.75	36.55	-0.18	27.01	-16.31	-83.39	-29	-15.35	3.21	-4.9	-95.46	-21.43	-0.01	-91.92	-94.36	72.66	-80.96	-78.39	-5.05	-88.8
CP_DIHYDROFOLATE_REDUCTASE_INHIBITOR	-24.36	0	-22	0.1	-2.62	-15.34	-2.3	-47.97	-80.43	93.63	-7.15	1.9	-40.67	-3.56	-25.31	-39.24	-25.7	-39.48	-37.29	4.94	-5.2	-11.03	-2.53	8.56	-6.85	9.3	-41.36	-60.21	-13.65	-41.91	-36.41	0.11	-2.64	14.12	-11.32	-13.55	-57.52	-4.75	-38.3	-21.75	43.06	-35	-4.23	-1.59	59.18	-14.7	11.45	-5.18	-12.32
CP_BENZODIAZEPINE_RECEPTOR_AGONIST	-32.82	0.24	-8.33	0.22	0.41	-2.95	-6.06	-42.87	31.44	-17.99	3.44	-20.31	-45.94	9.73	8.73	-19.47	-6.16	36.2	-52.48	-21.39	-14.95	15.81	-12.12	8.84	-11.31	-22.55	-64.38	-22.51	33.5	-34.17	24.16	2.13	-22.17	-4.76	-23.74	-3.07	-49.51	3.88	-39.34	-1.41	-3.98	-3.96	-42.21	-4.37	-3.61	-8.84	4.96	-8.41	-11.63
CP_CYCLOOXYGENASE_INHIBITOR	-46.01	0	-24.22	-0.87	-0.42	-16.79	-0.03	-53.51	-53.63	-28.43	0.84	-0.86	-49.71	-4.2	-11.28	-28.69	-10.19	-39.66	-23.8	5.64	-1.57	-0.19	-11.49	-43.01	-26.55	-8.15	-68.03	-11.73	4.69	-27.45	2.11	0.01	-2.19	-5.9	-12.37	-23.77	-18.16	-4.61	-42.03	-13.58	-2.39	-7.77	-23.07	3.5	-17.46	-29.06	-1.93	-40.68	-18.44
KD_XLMR_GROUP_2	-21.28	0	-76.43	-0.7	16.78	-16.7	11.87	-42.85	-62.99	-33.82	-59.72	-38.25	-50.21	-37.21	-29.87	-40.79	3.11	-1.92	-65.22	-19.11	-23.12	-65.05	-7.52	-61.53	-73.07	-55.99	-63.37	-43.95	-6.68	-77.39	-72.3	-22.1	-35.41	-0.39	-2.78	-49.73	-33.41	-76.22	-57.87	-73.65	-12.92	-4.55	-63.21	-0.72	-39.52	-40.08	-0.39	-58.75	-41.84
CP_FXR_ANTAGONIST	-60.15	-2.97	-37.38	-0.15	-2.43	-36.82	0.22	-68.81	-31.65	-40.36	-24.98	17.68	-53.75	-18.83	-67.44	-87.13	-38.24	-72.48	-56.36	-3.54	-11.14	-58.78	-12.57	-42.86	-25.72	-84.09	-2.61	-87.38	-22.8	-11.04	-32.93	-2.03	-66.8	-8.75	-3.25	-76.44	-80.26	-61.21	-4.21	-23.04	-46.15	-42.58	-82.48	-6.1	-29.64	-81.75	-13.95	-29.64	0.99
KD_PRD_CLASS_HOMEOBOXES_AND_PSUDOGENES	-71.91	0	-55.92	0.14	3.96	-6.2	0.58	-85.48	-74.66	-33.12	-12.25	-59.43	-53.85	-39.66	-60.32	-57.02	-0.75	-42.54	-70.62	-49.81	-13.59	-11.72	-29.3	-57.64	-54.94	-31.67	-64.42	-75.48	-3.64	-75.15	-32.25	-26.93	-21.9	-6.32	-27.85	-57.68	-41.88	-41.36	-53.33	-79.48	-11.08	-19.16	-74.74	-13.17	-24.32	-40.4	-7.89	-51.89	-72.91
KD_PI3K_SIGNALING	-20.55	0.1	-0.22	0.03	0	4.2	-0.13	-53.06	-76.7	-26.84	-1.73	-0.09	-54.81	-11.31	-32.27	-57.36	-9.82	-65.77	-46.39	19.05	-1.4	-1.83	-61.53	-37.78	1.59	-18.78	-54.96	-61.1	15.44	-17.68	-14.84	-0.13	-18.3	0.13	18.48	-71.58	-38.32	-12.35	-47.32	-51.12	7.8	-47.18	-39.21	-15.74	-24.95	-21.78	-4.47	-22.56	-66.63
CP_BILE_ACID	-47.19	2.82	-67.2	3.86	-22.72	-77.99	-12.58	-72.16	-17.92	-43.86	-49.22	20.3	-56.25	-32.19	-49.72	-92.35	-47.17	-58.39	-69.47	-44.44	-1.19	-73.83	-61.67	-34.81	-67.72	-85.75	-28.52	-96.13	-10.18	-15.99	-53.96	-1.92	-59.98	-23.97	-37.47	-82.17	-95.01	-56.8	27.62	-34.83	-63.64	-1.86	-62.72	-22.89	-53.82	-79.85	14.53	-40.77	-37.78
CP_BACTERIAL_30S_RIBOSOMAL_SUBUNIT_INHIBITOR	-75.45	1.85	-6.89	31.97	3.61	-8.12	-5.87	-39.83	-60.07	-10.03	-0.38	-2.18	-61.06	-46.98	-12.72	-76.78	-4.91	-49.41	-59.15	-36.19	-3.52	12.41	-75.48	-15.06	2.43	-14.48	-44.19	-47.01	28.2	-30.37	-24.47	-1.56	-8.32	-0.99	9.31	10.52	-64.9	-9.77	-23.58	20.19	-28.32	-28.8	10.12	-2.15	-11.95	-8.67	-3.21	-9.9	-7.09
OE_WNT_FAMILY	2.51	-0.01	-0.09	0.27	6.67	1.01	0.28	0.48	-42.1	-1.82	-10.41	-0.55	-63.71	32.44	-12.82	-12.61	18.23	1.06	-0.81	38.08	0.44	74.34	-0.55	24.78	-0.35	0.69	-6.04	-6.54	7.62	0.35	6.68	2.01	-0.34	0.27	0.43	-0.64	-0.91	-11.15	-0.6	7.41	0.6	0.48	7.41	2.42	0.38	0.93	-6.01	56.31	2.69
KD_EMSY_COMPLEX	-77.07	0	-13.49	-1.27	-7.15	-42.54	-10.89	-71.47	-70.2	-40.89	-10.33	-1.56	-67.83	-36.07	-65.58	-88.88	-15.21	-60.72	-75.35	-53.51	-28.77	-43.13	-63.14	-51.4	-2.5	-15.69	-48.43	-76.6	-11.4	-46.38	-13.05	-67.42	-45.35	-41.22	1.56	-62.21	-75.8	-43.44	-28.8	-48.32	-40.91	-4.01	-49.76	-1.19	-33.36	-79.57	-0.72	-46.73	-64.39
CP_SODIUM_CHANNEL_BLOCKER	-34.3	-0.01	-16.86	0	-1.09	-34.84	0.01	-14.95	-55.86	-10.8	-2.87	1.74	-71.57	-8.56	-38.72	-28.06	-8.47	-13.14	-35	3.01	-4.74	-1.63	-17.88	-17.02	-16.86	-10.67	-23.54	-13.43	9.45	-18.17	-14.08	-0.43	-5.03	-8.32	4.34	-73.76	-21.87	-6.68	-35.75	-24.13	-2.38	-31.98	-3.48	-2.76	-1.44	-20.89	16.29	-6.16	-31.56
KD_NON_HOMOLOGOUS_END_JOINING	-71.36	0	8.77	0	1.08	-23.73	0	-63.75	-61.05	-53.34	-6.62	0.69	-75.24	-64.72	-30.08	-60.95	6.92	-69.71	-52.21	-31.24	-13.47	5.76	-4.26	-72.28	20.64	-36.34	-47.74	-31.77	10.62	-23.39	15.91	0.13	-18.69	-4.15	7.25	-33.54	-39.5	-59.71	56.86	-17.5	-2.72	4.16	11.04	-3.09	-31.55	-14.84	0.75	-32.88	-75.26
OE_AKT_SIGNALING	-73.6	-3.4	-27	-2.05	-3.61	-83.03	-46.49	-67.28	-54.36	-52.68	-53.1	-10.06	-76.8	-81.11	-43.2	-79.8	-9.61	-72.33	-77.89	-9.14	-64.04	-90.67	-42.96	-64.49	-70.46	-62.13	-71.52	-98.32	-10.04	-70.25	-57.35	-69.86	-59.05	-48.23	-15.53	-58.89	-52.35	-88.27	-17.81	-85.35	-50.69	-54.61	-79.9	-50.91	-60.53	-80.63	-54.38	-32.96	-58.47
KD_SERPIN_PEPTIDASE_INHIBITORS	-64.86	0	-7.72	0	-17.06	-24.37	-6.83	-75.15	-93.13	-23.57	-33.37	-10.26	-78.62	-14.12	-9.53	-49.79	-4.01	-52.54	-32.54	-53.84	-27.85	-38.96	-73.47	-87.61	-67.13	-61.74	-83.29	-58.2	3.47	-57.2	-51.86	-75.81	-57.81	-0.02	-35.56	-58.18	-72.14	-63.01	-60.98	-52.16	-62.28	-80.85	-39.14	-44.07	-93.25	-25.07	-2.89	-84.55	-54.26
KD_MITOGEN_ACTIVATED_PROTEIN_KINASES	-78.73	-0.01	-50.56	-24.94	1.27	-22.46	-0.59	-50.81	-34.89	-57.72	-0.01	0.01	-80.5	-60.71	-54.72	-70.4	-38.76	-45.5	-29.7	-7.5	-32.95	-53.54	-66.08	-38.15	-0.65	-66.35	-46.61	-48.16	-5.78	-68.89	-37.27	-0.67	-8.96	-0.01	-4.95	-63.58	-48.09	-18.02	-53.2	-29.78	-16.7	-0.36	-13.34	1.49	-11.6	-59.51	5.4	-11.3	-43.43
CP_MDM_INHIBITOR	-99.89	-10.96	-94.21	-0.19	0.54	-90.27	3.68	-69.65	-82.59	-66.8	-42.52	3.31	-81.28	-75.36	-86.87	-86.76	-14.41	-97.75	-78.47	-57.33	-34.49	-81.97	-93.62	-82.4	-87.47	-59.79	-67.1	-94.85	-8.9	-14.6	-68.95	-34.45	-69.35	-33.71	-40.25	-88.93	-85.14	-71.49	-6.61	-89.98	-9.59	-34.99	-62.82	-46.78	-86.8	-72.06	-27.71	-70.71	-74.81
CP_FGFR_INHIBITOR	-40.13	-0.81	-77.74	-64.85	-0.25	-0.81	-46.74	-50.61	-77.24	-70.14	-60.83	-3.24	-83.25	-68.19	-71.43	-76.13	-15.22	-80.52	-89.09	-76.37	-0.05	-90.09	-33.72	-57.39	-0.42	-91.03	-69.79	-85.85	-17.13	-49.74	-19.98	-36.33	-63.24	-4.28	-21.12	-0.92	-69.17	-85.86	-6.65	-55.24	-72.83	-0.92	-49.46	-8.63	-62.97	-61.45	-17.08	-17.45	1.09
KD_S100_CALCIUM_BINDING_PROTEINS	-79.03	0	-41.78	0	-3.21	-63.5	0.22	-96.3	-70.41	-70.36	0	-2.54	-85.91	-75.91	-54.04	-80.54	-36.98	-79	-64.68	6.99	-40.47	-15.69	-93.54	-42.35	-61.26	-55.39	-91.56	-86	14.62	7.57	-67.96	-12.26	-4.43	-30.68	-2.96	-73.87	-58.56	-56.94	-18.62	5.29	-24.76	-37.74	-16.06	1.67	-74.76	-51.99	-14.3	-39.2	-75.3
OE_GPCR_SUBSET	-36.64	0.01	3.37	-0.05	-4.77	6.33	5.2	-36.27	8.99	-3.6	21.33	1.76	-87.74	2.69	-31.8	-82.95	-0.38	-36.69	-7.3	4.15	-11.41	0.31	-33.11	16.52	-2.07	-12.8	8.53	3.3	16.27	14.8	-3.85	-2.55	5.79	44.33	9.62	-7.85	-32.28	2.38	-5.29	0.93	3.33	0.25	13.78	0.8	-50.53	-0.48	6.22	12.96	-3.54
KD_WNT_FAMILY	-65.71	-0.02	-64.94	-3.52	-3.89	-36.48	-5.47	-33.41	-62.15	-70.64	-15.22	-14.45	-87.88	-0.44	-33.3	-63.87	0.01	-27.36	-58.59	-47.1	-72.6	-49.91	-66.27	-44.78	-64.4	-78.41	-70.33	-78.72	-37.23	-44.45	-44.07	-2.31	-57.08	-89.81	-45.62	-48.06	-55.84	-57.76	-86.02	-84.43	-29.4	-49.03	-66.07	-1.89	-60.21	-83.96	-32.22	-46.33	-75.19
KD_NADH_UBIQUINONE_OXIDOREDUCTASE_SUPERNUMERARY_SUBUNITS	-78.28	-0.01	-65.67	-0.01	0.13	-64.73	-10.8	-79.32	-78.46	-82.53	-42.93	-19.49	-89.24	-71.02	-81.33	-68.24	-72.81	-65.62	-89.59	-34.68	-41.14	-28.34	-72.31	-55.15	-61.46	-30	-69.79	-67.01	-42.12	-62.13	-70.47	-1.19	-42.28	-11.91	-44.65	-72.22	-72.13	-55.14	-58.26	-62.63	-65.55	-27.98	-81.54	-48.97	-83.47	-76.65	-2.05	-90.85	-89.86
KD_PHOSPHOLIPASES	-97.24	0	-67.92	-0.3	4.52	-73.8	-0.14	-92.94	-90.19	-86.66	-30.78	-73.95	-93.6	-91.29	-79.79	-92.08	-68.13	-87.46	-94.05	-63.77	-34.64	-29.29	-82.3	-81.67	-50.97	-79.2	-89.33	-79.92	-52.67	-20.84	-64.18	-65.72	-8.74	-50.54	-71.41	-89.22	-79.3	-67.01	-36.45	-80.44	-77.18	-52.47	-67.93	-65.83	-67.5	-56.96	-72.8	-84.8	-88.81
KD_INTEGRIN_SUBUNITS_BETA	-80.69	2.08	-61.19	0.28	1.38	-75.6	-1.68	-88.59	-94.18	-89.24	-40.3	-9.15	-96.91	-88.37	-95.5	-73.72	-41.28	-87.29	-84.24	-68.52	-81.67	-34.87	-90	-84.04	-74.83	-43.58	-94.79	-83.39	62.27	-70.05	-72.64	-12.93	-80.18	-69.61	-66.99	-86.62	-75.67	-88.85	-85.68	-92.33	-55.91	-24.97	-83.25	-17.48	-90.63	-86.06	-56.89	-92.71	-88.02
[truncated: 6 more columns]

## Sheet: PERT
PERT_ID	Name	Description	CMap Class	Target	MOA	MTOR	PIK3CA	RPTOR	PTEN	NF2	ATF7IP	ATXN7	CDKN2A	CTNNB1	CUL5	ERBB2	MAPK3	SMAD4	ATR	ATM	ACVR2A	APC	ARID1A	BRCA2	CCND1	CCNE1	CDKN1B	CREBBP	CSNK1A1	DUSP4	EGFR	LEF1	LPAR2	MAPK1	MAU2	NF1	NRIP1	SMAD2	SMARCB1	SMARCC2	TGFBR1	TGFBR2	TNFSF10	TP53	VPS45	WWTR1	XRCC1	YAP1	ADCY3
BRD-K37456065	VU-0365114-2	M5 modulator		CHRM5	M5 modulator	-38.65	-82.2	-70.32	-13.83	68.54	-98.38	-54.24	38.89	-72.76	-66.71	-67.03	-91.07	-5.6	-88.78	-93.87	-83.76	-87.74	-89.42	-90.94	-87.22	-87.4	-95.47	-77.19	-30.28	-66.03	-87.39	-97.04	-79.07	-93.11	-92.07	-94.86	-90.22	-59.85	-68.57	-77.34	-97.4	-96.51	-79.54	-66.28	-72.81	-91.31	-86.29	-63.79	-83.34
BRD-M30523314	vinorelbine	Tubulin inhibitor	Tubulin inhibitor	TUBB	Tubulin inhibitor	-25.36	-96.69	-75.5	17	4.47	-95.59	-86.03	-42.51	-55.55	0	-60.37	-30.78	-43.72	-87.69	-83.79	-88.41	-51.71	-31.36	-90.77	-69.11	-67.54	-69.67	-45.75	34.07	-91.01	-75.35	-51.98	-25.38	-94.26	-58.68	-19.43	-96.23	-70.92	-10.69	-6.77	-98.03	-76.13	-85.65	-30.8	-39.77	-88.57	-74.52	-23.87	-73.71
BRD-K94325918	kinetin-riboside	Apoptosis stimulant			Apoptosis stimulant	21.14	-34.43	25.27	-11.27	58.4	-95.07	49.2	0	-62.94	-78.07	-82.28	-72.38	-2.92	-78.09	-86.77	-28.55	-90.27	-14.34	-73	-49.26	-43.88	-84.13	-34.35	9.85	-89.43	-46.45	-90.31	-54.7	-90.37	-27.55	-34.4	-71.18	-93.34	-33.15	-57.45	-62.58	-51.71	-83.71	-78.37	-40.45	-86.59	-22.37	-48.99	-88.57
BRD-K99498722	NPI-2358	Tubulin inhibitor	Tubulin inhibitor		Tubulin inhibitor	0	-32.72	-28.29	42.37	-1.2	-94.77	-24.06	-12.78	9.08	1.9	-29.93	-10.87	-3.44	20.81	-42.66	-4.86	23.08	-1.97	-12.14	22.26	-32.02	-1.13	-77.86	61.65	-22.73	-37.97	-13.47	66.82	-70.1	-42.91	-22.37	-86.24	-7.78	58.92	-8.67	-76.31	-28.63	-32.34	10.24	25.84	-5.84	52.95	21.79	22.27
BRD-K86003836	flubendazole	Tubulin inhibitor	Tubulin inhibitor	TUBB	Tubulin inhibitor	-51.3	-87.36	-69.21	-17.27	8.67	-94.51	-3.69	14.7	-78.14	6.23	-92.96	-91	85.59	-97.25	-96.69	-89.62	-78.57	-91.67	-92.66	-71.7	-87.42	-71.64	-81.64	-58.14	-96.02	-96.37	-93.88	8.56	-96.19	-84.43	-86.03	-97.29	-26.2	-7.73	-32.07	-95.41	-89.98	-44.96	-79.01	-73.73	-63.2	-5.85	-28.75	-66.98
BRD-K91623615	ABT-751	Tubulin inhibitor	Tubulin inhibitor	TUBB	Tubulin inhibitor	-77.5	-96.65	-93.88	92.59	60.81	-94.3	-79.21	-28.58	-89.57	-1.62	-77.09	-93.17	-27.74	-86.63	-90.74	-94.52	-95.41	-76.87	-98.31	-84.19	-79.37	-70.82	-88.94	-83.32	-87.92	-95.77	-89.35	61.72	-96.69	-95.84	-88.6	-98.45	-2.15	26.67	-47.29	-94.43	-95.28	-83.22	-23.96	-5.48	-92.26	-89.99	-78.7	-90.55
BRD-K35687265	ON-01910	PLK inhibitor		CDK1, FLT1, FYN, MCL1, PDGFRA, PLK1, PLK2, SRC	PLK inhibitor	-6.57	-69.96	-50.07	-58.6	56.27	-93.97	-86.17	-74.93	-67.89	-91.13	-58.24	-87.6	-87.75	-90.92	-88.9	-97.22	-64.32	-91.89	-88.75	-85.73	-75.22	-90.24	-57.56	-86.41	-92.42	-79.82	-75.07	-21.67	-96.98	-94.85	-93.74	-96.72	0	-2.64	-86.47	-97.85	-97.36	-55.7	-43.69	-63.96	-66.51	-50.12	-53.49	-59.41
BRD-K89046952	ciclacillin	Bacterial cell wall synthesis inhibitor			Bacterial cell wall synthesis inhibitor	-4.93	-83.07	3.33	-2.08	-16.71	-93.34	-65.35	-63.24	-76.47	-26.9	-53.65	-1.66	-26.14	-21.91	-66.9	-86.9	-90.73	-24.28	-59.58	-58.41	-56.18	-25.51	-6.27	-73.69	-61.28	-90.58	-77.75	-72.69	-55.29	-70.2	-63.15	-72.92	-35.81	-9.9	0	-32.03	-33.37	-59.33	-78.6	-32.64	-46.21	-92.11	-35.01	-52.92
BRD-K72264770	QW-BI-011	Histone lysine methyltransferase inhibitor		EHMT2	Histone lysine methyltransferase inhibitor	-39.45	-77.17	-50.38	0	-10.69	-93.06	-73.04	-61.46	-73.03	-46.32	-88.93	-74.14	0	-97.78	-93.72	-70.52	-91.96	-56.97	-95.28	-80.92	-91.58	-91.93	0	-86.37	-79.78	-85.11	-90.05	-73.24	-77	-81.41	-90.66	-50.51	-85.89	-35.38	-88.81	-88.84	-98.8	-76.19	-85.52	-93.87	-59.66	-66.51	-27.84	-85.1
BRD-K70511574	sunitinib	PLK inhibitor		FLT3, KDR, KIT, FLT4, FLT1, PDGFRA, PDGFRB, RET, CSF1R, FGFR1	PLK inhibitor	-41.11	-93.76	-60.64	-17.32	33.03	-92.48	-94	-34.46	-78.11	-1.92	-79.09	-40.46	-3.77	-22.89	-78.53	-95.49	-75.66	-59.58	-93.94	-83.53	-63.34	-29.66	-35.55	-25.68	-93.79	-94.03	-77.73	-27.02	-85.52	-84.57	-60.06	-92.85	-38.31	-8.59	-59.5	-95.56	-70.54	-89.7	-33.28	-32.1	-91.29	-66.87	-69.13	-85.11
BRD-K55420858	mirin	MRE11A exonuclease inhibitor		MRE11A	MRE11A exonuclease inhibitor	9.03	-81.67	-67.1	58.11	0	-92.04	-86.54	-66.16	-62.79	-4.37	-55.39	-70.98	-4.19	-3.95	-41.92	-94.82	-61.73	-25.45	-70.12	-76.36	-94.19	-50.59	-94.57	-84.01	-95.09	-87	-69.09	-45.35	-86.72	-79.02	-88.04	-97.56	-57.95	12.5	-43.46	-89.58	-73.79	-44.38	-81.92	-51.41	-92.29	0	-64.82	-87.1
BRD-K56301217	ABT-737	BCL inhibitor	BCL inhibitor	BCL2, BCL2L1, BCL2L2	BCL inhibitor	-0.03	-74.76	-0.18	16.39	1.09	-91.13	0.78	0.02	-19.73	3.04	-92.24	-18.84	-83.02	-63.54	-48.74	-48.87	-71.06	-54.43	-71.34	-46.07	4.15	-10.59	-23.18	-89.19	-90.89	-10.38	-42.47	-48.97	24.62	-84.18	-8.71	-15.32	-76.92	-82.41	-33.88	-18.93	-6.56	-68.1	-64.58	-16.83	-82.11	-28.39	-86.96	-64.61
BRD-K12539581	nocodazole	Tubulin inhibitor	Tubulin inhibitor	HPGDS	Tubulin inhibitor	-43.94	-92.75	-70.42	35.25	56.23	-91.06	-40.54	-3.67	-77.92	-10.46	-50.88	-91.14	-27.94	-7.93	-89.95	-50.53	-87.63	-82.79	-93.02	-61.88	-91.99	-60.57	-84.73	7.53	-92.33	-90.13	-92.95	46.64	-94.05	-80.73	-81.19	-96.48	-72.03	9.55	-82.74	-94.6	-91.01	-27.2	-40.05	-53.21	-90.04	-32.27	-29.26	-80.43
BRD-K19416115	sitagliptin	Dipeptidyl peptidase inhibitor		DPP4, CYP2C8, FASLG, HMGCR, SLC22A8	Dipeptidyl peptidase inhibitor	0	-81.59	0	-4.14	0	-90.72	-93.84	-65.03	-91.72	-95.38	-92.56	-95.29	-73.94	-93.33	-88.87	-94.26	-95.2	-98.37	-98.73	-98.48	-99.08	-96.27	-49.22	-98.39	-93.41	-94.69	-94.88	-94.64	-31.79	-97.03	-78.6	-62.17	-42.54	-91.51	-41.93	-95.18	-80.9	-90.12	-96.03	-87.88	-95.35	-89.96	-95.95	-98.59
BRD-A17819071	gedunin	HSP inhibitor		HSP90AA1	HSP inhibitor	-5.67	-54.02	-3.95	6.24	-36.82	-90.4	-9.59	-36.87	-78.95	-14.44	-90.64	-5.77	-11.5	-79.43	-69.76	-41.18	-78.83	-56.83	-87.99	-69.67	-79.55	-87.54	-9.89	-20.07	-10.97	-75.25	-84.2	-26.98	-69.42	-93.46	-42.33	-36.8	-64.68	-60.84	-56.91	-51.51	-68.62	-41.65	-27.99	-94.43	-97.27	-60.72	-75.96	-87
BRD-K59184148	SB-216763	Glycogen synthase kinase inhibitor	Glycogen synthase kinase inhibitor	GSK3B, CCNA2, CDK2, GSK3A	Glycogen synthase kinase inhibitor	-2.82	-94.5	-86.77	99.26	-65.33	-89.97	-98.31	-76.32	-93.8	0	-97.81	-95.4	81.48	-24.15	-31.77	-30.07	-43.59	18.49	-54.62	16.63	-76.55	-28.82	0	12.04	-83.86	-98.31	-85	-14.85	-83.9	-93.99	-71.4	-90.78	-4.21	-1.23	-1.59	-1.3	-8.41	-94.89	-66.27	-96.44	-90.37	-47.89	9.98	-97.2
BRD-K90382497	GW-843682X	PLK inhibitor		PLK1, PLK3	PLK inhibitor	-43.72	-99.01	-98.03	98.42	96.83	-88.87	-35.49	-36.16	-40.67	1.83	-87.26	-83.9	42.78	-0.56	-95.96	1.16	-96.95	-7.35	-99.04	-73.31	-87.7	-90.47	-72.51	-26.87	-82.91	-77.81	-88.72	5.04	-84.9	-97	-86.13	-97.57	-44.86	-2.96	-4.44	-95.45	-91.01	-88.1	-45.71	43.37	-64.75	-74.87	-81.86	-90.35
BRD-K56614220	clofazimine	GK0582 inhibitor			GK0582 inhibitor	-17.83	-80.47	7.38	-5.85	-47.07	-88.38	6.66	-58.24	-4.37	-50.09	-72.66	-45.91	-63.71	-44.22	-55.77	-42.62	-31.62	-80.06	-82.62	-43.74	-32.89	-71.72	8.77	-18.44	-98.58	-17.2	-86.78	-82.52	-68.8	-75.51	-74.94	-66.85	-94.25	-1.48	4.67	-54.08	-8.16	-15.26	-41.78	-31.86	-86.13	-65.95	-51.05	-65.9
BRD-K53561341	KIN001-220	Aurora kinase inhibitor	Aurora kinase inhibitor	AURKA	Aurora kinase inhibitor	37.8	-32.74	44.26	-67.13	0	-88.32	10.35	-2.43	-6.72	0	3.38	-58.65	2.08	-7.09	-64.37	-75.53	-23.24	-26.14	-24.73	-82.21	-23.62	-16.11	-90.54	-66.11	-35.4	-37.38	-19.42	-14.33	-13.18	-28.02	-20.77	-2.11	-71.73	-69.17	-30.91	0	-18.71	-30.83	-8.51	-7.76	-2.11	-2.15	-67.27	-40.57
BRD-A17065207	brefeldin-a	Protein synthesis inhibitor	Protein synthesis inhibitor	ARF1, ARFGEF1, ARFGEF2, CYTH2, GBF1, SAR1A	Protein synthesis inhibitor, Brefeldin A inhibited guanine nucleotide exchange protein inhibitor, Golgi-specific brefeldin A-resistance guanine nucleotide exchange factor inhibitor	47.67	53.46	84.43	-53.76	5.29	-88.22	66.32	3.96	18.46	0	43.23	17.06	0	0	-3.91	28.07	-62.43	-3.98	61.81	14.62	84.41	3.87	-28.71	-64.46	-14.64	83.52	-4.18	4.9	64.07	43.99	0	56.44	-35.68	-64.39	-33.98	0	61.34	15.81	53.85	18.42	-56.58	75.48	-63.67	-14.88
BRD-K03406345	azacitidine	DNA methyltransferase inhibitor		DNMT1	DNA methyltransferase inhibitor	-11.8	8.81	0	-11.3	32.64	-88.12	71	0	-33.76	0	-8.77	0	0	18	7.36	25.37	-31.52	11.56	50.3	12.21	14.79	-8.73	-65.78	29.2	0	0	-62.13	0	-77.22	-35.95	-37.42	8.03	-66.1	0	-57.96	-25.42	16.4	-10.55	-29.15	40.87	-46.11	0	6.8	-39.89
BRD-K14550461	doxercalciferol	Vitamin D receptor agonist	Vitamin D receptor agonist	VDR	Vitamin D receptor agonist	-13.33	-95.55	-82.07	-25.05	11.36	-88.07	-73.51	-75.7	-79.1	-92.06	-61.44	13.68	-86.69	-78.93	-91.19	-68.39	-93.77	-80.86	-80.3	-72.67	-94.05	-85.11	-44.47	-64.55	-90.42	-92.21	-92.36	-89.59	-84.92	-95.42	-71.03	-80.77	-44.12	5.92	-98.33	-85.32	-93.25	-90.33	-66.07	-81.77	-70.49	-81.26	-81.33	-89.49
BRD-K99451608	lopinavir	HIV protease inhibitor	HIV protease inhibitor		HIV protease inhibitor	0	-26.03	-5.81	12.84	48.47	-88.03	-47.6	-3.36	-60.8	3.42	-89.8	-66.88	-20.74	-59.31	-74.2	-53.13	-96.15	-37.07	-77.63	-45.99	-35.63	-62.75	-3.24	-91.71	-41.55	-68.36	-76.54	-76.19	0	-89.93	-49.88	-5.32	-13.52	-71.99	-53.42	-29.23	-3.03	-50.97	-82.9	-50.39	-82.19	-48.24	-96.65	-78.06
BRD-K51485625	ritonavir	HIV protease inhibitor	HIV protease inhibitor	CYP3A4, CYP1A2, CYP2B6, CYP2C19, CYP3A5, CYP3A7	HIV protease inhibitor	-0.24	-30.61	0.99	-28.66	-61.51	-87.95	-11.07	-0.95	-88.6	-17.73	-63.89	-11.76	-48.38	-55.91	-6.91	-38.09	-43.65	50.13	-49.31	-55.89	-23.25	-59.13	-70.2	-70.85	-84.18	-70.87	-81.65	-94.89	2.89	12.69	-25.13	-13.06	-49.91	-85.2	-87.51	-40.73	13.36	-63.63	-58.72	-37.81	-50.37	-27.29	37.92	-86.06
BRD-A67605442	tetrahydrobiopterin	Nitric oxide stimulant		PAH, TH, DBH, NOS3, TPH1	Nitric oxide stimulant, Nitric oxide synthase stimulant, Phenylalanine 4-hydroxylase stimulant	-28.14	-98.24	-74.21	6.9	38.44	-87.13	-38.13	-68.44	-66.04	0	-31.63	-40.6	0	-7.75	-44.93	-49.53	-39.37	0	-50.02	-58.69	9.02	-43.15	-16.35	-16.64	-46.94	-73.87	-82.39	-86.97	-70.69	-81.72	-84.32	-76.02	-87.49	11.55	-6.81	-65.3	-74	-78.02	-32.36	-31.92	-83.73	-71.77	10.21	-31.98
BRD-K31238592	devazepide	CCK receptor antagonist	CCK receptor antagonist	CCKAR, CCKBR, GAST	CCK receptor antagonist	0	3.21	25.15	-6.88	-38.51	-86.9	-13.62	-4.65	-59.22	-40.39	6.93	-35.37	0	-0.88	-13.02	65.7	-47.95	44.94	5.29	-23.4	27.51	-30.61	-45.14	13.97	-60.95	-71.55	-53.95	65.4	-67.36	-38.68	-46.73	20.94	-18.09	6.77	-19.11	-1.66	-11.71	-25.6	1.55	-71.8	-26.63	-15.78	7.67	15.29
BRD-K78659596	MLN-2238	Proteasome inhibitor	Proteasome inhibitor	PSMB1	Proteasome inhibitor	41.09	-1.55	57.43	80.78	-2.33	-86.43	82.93	6.06	12.87	1.41	81	20.14	-35.24	14.57	-1.59	90.17	-36.02	85.03	80.67	28.06	86.54	12.01	2.08	42.96	0	14.43	-9.87	75.72	-41.09	16.23	-20.27	2.18	0	66.1	25.1	5.31	11.48	-8.03	-3.98	10.24	-29.53	44.67	45.27	-44.46
BRD-A38898897	GW-311616	Leukocyte elastase inhibitor		ELANE	Leukocyte elastase inhibitor	0	-73.2	0	-1.8	-35.01	-86.4	-73.37	-65.54	-71.61	-19.92	-57.04	-74.51	-34.45	-39.13	-66.53	-65.35	-75.54	-42.66	-30.04	-75.71	-38.19	-46.02	-13.08	-87.54	-77.1	-72.66	-60.09	-71.75	-25.98	-92.4	-64.97	-76.79	-82.88	-35.91	-58.95	-30.44	-38.81	-89.27	-48.07	-73.03	-74.83	-49.7	-33.24	-50
BRD-K03670461	tyrphostin-AG-82	EGFR inhibitor		EGFR, LCK	EGFR inhibitor	0.18	-67.05	-1.34	0.28	15.54	-85.94	10.77	5.69	-80.68	-83.34	-18.83	17.41	-1.13	-8.14	-51.54	-3.21	-44.9	-27.62	-52.78	-77.85	-38.63	-89.98	-13.78	-31.62	-83.57	-62.54	-73.8	-30.04	27.31	-43.7	-74.02	3.21	-67.48	-62.77	-43.9	-85.93	-57.02	-55.95	-57.55	-55.49	-93.72	-27.31	-73.76	-78.81
BRD-K66792149	quinoclamine	Algicide			Algicide	-8.17	47.21	4.02	-88.29	0	-85.87	82.3	-25.09	0.63	-62.24	4.15	28.2	-59.97	66.27	-55.39	81.89	34.28	38.78	80.74	54.65	-28.02	50.24	-65.57	78.34	-66.72	26.16	-6.83	77.03	-91.3	28.37	-21.67	-43.62	-24.06	1.06	0	26.7	45.89	17.17	-8.7	-69	-5.58	45.13	74.18	-21.14
BRD-K92301463	16,16-dimethylprostaglandin-e2	Prostanoid receptor agonist		HPGD	Prostanoid receptor agonist	-1.73	0.81	-0.11	50.37	-0.53	-85.13	0.67	1.24	-64.33	-5.96	-29.17	0.42	-0.42	-30.01	-0.32	11.44	-53.2	77.3	-49.82	-19.05	-7.44	-47.84	37.61	-42.08	-0.14	-86.46	-27.28	-4.26	-63.18	-64.43	-0.35	-23.87	-4.14	80.22	-4.34	4.26	-21.86	-41.36	-19.67	-10.82	-11.81	3	7.79	-46.49
BRD-K91145395	prostratin	PKC activator	PKC activator	PRKCA, PRKCB, PRKCD, PRKCE, PRKCG, PRKCH, PRKCQ	PKC activator	-14.8	-84.41	-46.06	-31.83	-82.66	-84.34	38.75	-66.94	-9.89	-84.78	-4.97	-35.99	-33.35	-90.47	-57.14	65.63	-75.46	-54.96	-27.82	20.96	-30.19	-79.7	-76.18	48.94	-77.39	-74.28	-86.42	10.02	-96.92	-8.3	-45.02	-9.98	-85.76	0	-83.18	-80.53	-75.72	-70.7	-43.95	-78.62	-63.9	0	-54.24	-49
BRD-K86465814	HO-013	PPAR receptor agonist	PPAR receptor agonist	PPARG	PPAR receptor agonist	-72.2	-93.32	-76.24	9.58	-93.13	-84.29	-53.19	-5.72	-44.34	-68.3	-94.47	-75.73	-22.37	-55.91	-16.79	-93.72	-47.28	0	-95.17	-59.9	-79.81	-81.28	25.76	-83.96	-83.83	-54.69	-91.08	-87.87	-43.5	-91.91	-35.27	-47.69	-46.05	15.23	-56.81	-54.9	-65.23	-82.15	-83.44	-46.92	-24.57	-91.52	25.4	-85.99
BRD-A73680854	PT-630	Dipeptidyl peptidase inhibitor		DPP4, FAP	Dipeptidyl peptidase inhibitor	-15.48	-96.79	-50.25	15.62	0	-83.88	-83.74	-56.66	-94.23	-33.93	-93.2	-62.01	-43.1	-64.02	-91.71	-81.21	-83.04	-77.93	-98.03	-96.37	-65.05	-87.53	-28.66	-95.8	-83.83	-97.81	-85.77	-96.19	-17.37	-98.98	-89.44	-80.69	-58.04	-84.01	-67.01	-92.38	-63.41	-85.55	-96.4	-72.49	-94.96	-94.05	-80.91	-98.03
BRD-K37865504	LY-2183240	FAAH inhibitor		FAAH	FAAH inhibitor	0.02	-62.12	0.02	5.74	0.42	-83.88	5.19	-19.01	-28.59	2.29	14.05	-26.58	-0.04	2.15	-16.59	-40.42	-39.14	-1.02	-59.85	-5.4	-45.99	-55.57	-23.48	29.78	-83.83	-60.92	-20.57	63.43	-89.56	-34.87	1.9	-92.99	0.79	47.95	-0.02	-84.61	-93.32	-1.16	0.88	46.54	-36.21	3.8	-1.87	-31.19
BRD-K46862739	metyrapone	Cytochrome P450 inhibitor		CYP11B1, HSD11B1, NR3C2	Cytochrome P450 inhibitor	-12.02	-92.5	-48.67	42.71	-11.23	-83.61	-76.53	-30.92	-31.98	-41.63	-90.81	-9.25	-40.27	-46.07	-76.29	-87.45	-58.43	-59.26	-11.07	-37.26	-62.54	-66.54	-25.41	-65.93	-85.77	-73.51	-24.01	-81.09	-45.81	-47.68	-19.47	-10.92	19.34	-3.45	-3.98	-59.81	-55.85	-62.98	-66.26	-45.76	-83.38	-69.19	-57.77	-75.68
BRD-K51730347	diphencyprone	Immunostimulant			Immunostimulant	-37.66	-42.06	-2.33	78.11	-15.06	-83.6	23.06	15.91	-11.25	-51.42	44.63	-18.12	-75.54	-27	16.25	21.89	-29.38	44.53	5.74	32.68	59.22	-21.23	31.68	-17.29	-35.53	-47.17	-46.1	11.79	-71.18	14.6	-8.32	-31.93	-42.01	11.29	-28.72	9.96	58.4	-17.1	16.1	-11.36	15.98	-6.89	-15.16	-35.92
BRD-A62184259	cycloheximide	Protein synthesis inhibitor	Protein synthesis inhibitor	GSK3B, RPL3	Protein synthesis inhibitor	53.51	18.75	44.99	-95.98	89.36	-83.51	2.42	-71.18	-76.68	-93.2	-42.32	-23.96	-92.83	-3.6	-1.55	-4.44	-21.22	-96.65	12.89	22.77	-81.16	-73.66	-97.22	31	-91.31	-45.87	-50.7	90.64	-85.32	-14.69	-88.26	-19.84	-40.27	-37.63	-89.97	-60.16	53.04	-8.91	-32.07	-39.16	-45.36	-68.31	31.25	-87.42
BRD-K84895041	BMY-45778	IP1 prostacyclin receptor agonist		PTGIR	IP1 prostacyclin receptor agonist	0	-64.39	2.24	-27.98	-58.33	-83.46	54.43	-18.26	-45.48	-33.88	-5.46	6.84	-15.36	-72.34	-54.55	68.61	-72.26	50.29	37.22	52.22	51.19	-45.25	-7.16	2.91	-76.02	-25.14	-50.9	40.18	-62.51	23.49	-70.89	52.02	-38.12	49.23	-52.02	-6.4	-17.06	-19.26	-45.87	-83.08	5.27	24.51	49.5	-34.88
BRD-A57457122	VU-0400071-3	Glutamate receptor modulator		GRM4	Glutamate receptor modulator	0	-14.28	1.9	-1.87	0	-83.25	-46.39	-38.58	-72.77	-38.77	-33.23	-3	-11.07	-56.51	-15.33	-71.61	-63.47	-76.07	-37.46	-94	-78.77	-73.15	-39.9	-82.81	-61.9	-67.52	-60.1	-29.13	-29.73	-57.42	-64.52	-26.42	-4.26	-69.81	-62.42	-77.19	-56.12	-53.58	-47.84	-24.64	-74.35	-79.32	-26.89	-88.23
BRD-K82109576	vincristine	Tubulin inhibitor	Tubulin inhibitor	TUBB, TUBA4A	Tubulin inhibitor	0	-49.57	-3.02	-14.85	24	-83.07	-40.41	-47.04	-79.45	-85.66	-68.3	-88.11	-50.6	-34.16	-16.8	-87.11	-89.55	-60.33	-90.28	-92.73	-81.82	-80.91	-80.58	-82.63	-66.67	-78.85	-74.09	73.99	-97.85	-69.88	-34.35	-77	-77.88	11.23	-50.08	-79.58	-93.92	-13.85	-54.19	-84.61	-76.9	-45.83	-62.64	-76.66
BRD-K90864987	cobalt(II)-chloride	HSP inducer	HIF activator	HIF1A	HSP inducer	0	-93.81	0	0	15.76	-82.6	61.22	58.28	74.61	39	-21.88	30.34	-35.27	6.7	-36.61	-50.94	-56.27	7.91	4.69	-87.38	-88.36	-16.75	65.95	-50.62	53.05	30.44	-94.83	-20.02	15.08	-25.42	78.06	39.81	28.61	10.03	-53.53	66.44	6.81	59	25.72	69.68	85.31	-84.45	7.36	-50.57
BRD-A31800922	procyclidine	Acetylcholine receptor antagonist		CHRM1, CHRM2, CHRM3, CHRM4	Acetylcholine receptor antagonist	-13.22	-92.59	-7.7	0	-5.25	-81.87	-24.53	-70.42	-82.89	-62.64	-82.79	-20.54	-3.66	-31.27	-44.86	-23.09	-53.55	-7.08	-63.2	-68.9	-21.74	-69.86	-7.57	-78.3	-49.19	-30.3	-88.59	-65.87	-20.72	-31.41	-71.42	-55.38	0	-72	-64.45	-16.59	-33.45	-38.57	-17.82	-25.44	-27.6	-79.22	-32.52	-80.06
BRD-K64935403	ebelactone-b	Lipase inhibitor		PNLIP	Lipase inhibitor	-28.6	-96.16	-53.74	1.83	0	-81.36	-88.9	-15.62	-77.71	-6.27	-83.98	-37.98	-7.41	-77.08	-77.22	-40.63	-97.46	-37.46	-98.41	-22.51	-64.98	-46.68	-3.2	-23.02	-77.25	-79.49	-72.93	-65.13	-38.45	-62.05	-44.25	-67.37	-3.88	-19.63	-20.55	-82.33	-72.31	-73.9	-65.27	-38.44	-70.08	-28.96	-36.43	-72.46
BRD-K74402642	NSC-632839	Ubiquitin specific protease inhibitor		USP2, USP7, SENP2, USP1	Ubiquitin specific protease inhibitor	0	-6.47	0	27.63	-1.48	-80.66	91.52	-6.13	51.35	-17.71	43.63	65.05	13.57	-29.12	70.17	89.45	41.56	49.43	87	28.65	81.32	1.02	2.01	59.46	-7.45	15.32	-24.9	77.58	-21.77	40.46	-31.05	0	0	41.53	0	-69.23	43.02	71.04	25.93	22.37	-14.23	80.94	36.54	-25.86
BRD-A62182663	YK-4279	Apoptosis stimulant		DHX9, EWSR1, FLI1	Apoptosis stimulant, EWS-FLI1 inhibitor	-6.42	-96.82	-40.04	55.51	4.18	-80.13	-46.36	-4.28	-38.09	-39.56	-58.6	-53.79	0.95	5.88	-83.67	-90.33	-40.44	-1.2	-88.66	-81.91	-17.53	-67.1	-0.99	-40.78	-19.9	-39.89	-65.64	-13.77	-58.43	-55.65	-14.85	-96.54	-0.67	-13.98	17.53	-96.03	-5.95	-30.3	-54.08	52.6	-75.1	-80.68	-35.84	-3.66
BRD-K59753975	vindesine	Tubulin inhibitor	Tubulin inhibitor	TUBB, TUBB1	Tubulin inhibitor	0	-52.58	0.49	1.76	67.72	-79.6	21.77	18.91	-48.17	0.49	-59.86	-65.96	-25.58	-30.97	-1.26	9.99	69.82	-35.33	-24.5	25.4	-48.31	-39.45	-86.08	31.63	-64.77	-24	-27.14	50.34	-90.05	39.66	-28.88	-46.37	-1.75	84.12	-65.17	-32.34	-80.27	-37.6	54.86	27.4	51.01	41.38	49.68	-2.69
BRD-A14985772	ascorbyl-palmitate	antioxidant			antioxidant	0	-92.51	0	-51.61	0	-79.09	-68.87	-85.97	-96.98	-95.54	-77	-21.08	-5.59	18.71	-92.08	-90.06	-96.88	-77.22	-81.33	-81.61	-75.33	-69.36	-29	-85.46	-84.64	-81.38	-96.02	-50.32	-63.02	-94.86	-50.44	-7.6	-62.71	-48.12	-11.63	-79.58	-36.05	-89.72	-54.83	-68.19	-94.91	-90.06	-10.2	-94.74
BRD-A80775386	hyperforin	Cyclooxygenase inhibitor		NR1I2, ALOX5, PTGS1, TRPC6	Cyclooxygenase inhibitor, Dopamine uptake inhibitor, Interleukin receptor antagonist, Lipoxygenase inhibitor, Serotonin reuptake inhibitor	-5.58	-2.5	1.76	-58.83	2.57	-78.73	9.61	0	-3.98	-17.18	-69.25	21.95	-20.84	-83.48	-82.91	4.26	8.19	6.09	7.67	-45.39	-47.9	-17.15	0	-24.66	-56.94	-25.94	-67.74	-54.42	-46.07	-31.48	10.35	-21.68	-67.46	-25.54	-32.39	-2.57	17.81	-48.09	-27.08	-15.51	-49.18	11.57	-10.68	-66.7
BRD-A17448384	beclometasone	Glucocorticoid receptor agonist	Glucocorticoid receptor agonist	NR3C1, CYP3A5, GPR97, SERPINA6	Glucocorticoid receptor agonist	0	-55.66	-2.01	-40.48	-18.86	-78.53	-62.82	-57.26	-70.04	-65.37	-51.45	-41.4	-8.68	-26.28	-27.58	-65.92	-66.7	-14.45	-64.02	-87.01	-64.89	-78.19	-55.88	-93.28	-37.71	-55.8	-74.7	-60.74	-69.39	-81.91	-69.31	-52.76	-2.33	-76.57	-21.03	-63.48	-38.73	-27.53	-36.66	-41.34	-43.41	-69.94	-20.58	-71.37
BRD-A49172652	lansoprazole	ATPase inhibitor		ATP4A, CYP2C19, CYP3A4, CYP3A5	ATPase inhibitor	0.07	-47.85	0.06	-17.86	-24.05	-78.37	-47.89	-92.64	-76.86	-95.67	-88.45	-50.24	-2.18	-79.49	-90.82	-79.05	-70.58	-88.49	-53.41	-96.65	-89.77	-92.84	-14.41	-87.11	-81.53	-87.08	-53.06	-13.97	-40.93	-82.51	-89.42	-62.73	-62.06	-70.52	-4.76	-66.69	-43.48	-82.99	-60.75	-85.79	-80.45	-76.89	-76.09	-95.05
BRD-K31491153	1-phenylbiguanide	Serotonin receptor agonist		HTR3A, HTR3B	Serotonin receptor agonist	0	-81.75	0	-15.61	0	-78.13	-44.35	-22.11	13.14	0	-29.72	0	-34.43	68.55	-42.55	-19.05	29.34	57.02	-30.3	-14.04	-27.9	19.91	27.61	43.98	14.57	34.9	-26.57	-57.41	-79.57	0	14.04	-17.63	-68.65	49.34	0	18.34	0	-49.99	0	0	22.07	14.09	15.52	-33.56
BRD-K47328134	lysylphenylalanyl-tyrosine	Heparin activation inhibitor			Heparin activation inhibitor	-1.07	-42.47	-48.64	-10.67	-15.1	-78.06	-73.28	-23.23	-74.89	-32.69	-30.1	-43.09	-39.3	-63.19	-53.29	-28.5	-75.47	-34.22	-46.83	-46.77	-18.96	-64.53	-35.29	-63.09	-88.31	-88.6	-51.29	-54.81	-18.25	-60.64	-68.29	-35.62	-37.13	-17.58	-42.35	-64.77	-35.31	-30.55	-45.53	-40.89	-55.75	-40.33	-29.97	-63.25
BRD-K18799075	BAY-59-3074	Cannabinoid receptor partial agonist	Cannabinoid receptor agonist	CNR1, CNR2	Cannabinoid receptor partial agonist	0	-10.93	-28.33	0	0	-78.03	-9.79	-0.99	-37.35	-1.83	-45.83	-1.52	-6.29	-7.24	-11.21	-39.53	-54.49	-11.9	-69.39	-19.8	-20.52	-5.44	15.75	-44.97	-29.16	-24.29	-11.64	7.13	-42.32	-56.23	6.96	1.34	-1.42	18.45	-1.13	6.22	-47.72	-5.46	-36.3	-63.17	-17.35	-49.01	26.46	12.1
BRD-K04146668	GW-441756	Growth factor receptor inhibitor		LRRK2, NTRK1	Growth factor receptor inhibitor	-5.71	-14.65	-1.09	-36.42	-18.45	-77.6	5.11	-0.7	-34.49	-21.87	-5.88	-14.92	-39.07	-8.49	-65.46	-54.86	-26.53	-61.92	-4.51	-2.01	-1.13	-66.9	-12.5	-35.38	-33.11	-2.97	-60.83	-85.18	0.78	-11.91	-31.83	-19.44	-79.35	-17.61	-1.09	0	-1.41	-10.03	-22.7	-23.14	-31.68	-52.36	-20.08	-15.76
BRD-A48430263	pioglitazone	Insulin sensitizer	PPAR receptor agonist	PPARG, INS, TRPM3	Insulin sensitizer, PPAR receptor agonist	1.06	-84.8	-0.95	35.39	-6.38	-77.59	-52.09	-5.26	-81.28	-36.93	-52.97	-79.03	-1.74	11.59	-19.78	-57.61	-92.28	2.63	-73.35	-6.99	-64.98	-19.82	2.15	-18.4	-53.73	-87.41	-87.71	-88.87	-53.36	-32.72	-10.64	-48.55	-9.6	-6.16	7.04	-35.31	31.16	-89.85	-18.6	-16.6	-18.53	-57.17	18.46	-88.52
BRD-K85383046	IAA-94	Chloride channel blocker			Chloride channel blocker	0	-55.46	-0.81	-8.69	10.43	-77.54	-39.06	-34.93	-61.39	-35.67	-62.55	-13.68	21.54	-48.73	-51.67	-29.63	-83.67	-44.17	-59.08	-74.93	-29.74	-44.93	-16.53	-31.14	-66.13	-41.93	-84.32	-52.01	-24.35	-69.18	-33.63	-8.62	-42.61	-35.26	-22.19	-58.57	-30.21	-66.33	-47.06	-35.13	-80.06	-80.43	-20.26	-53.05
BRD-K81709173	halcinonide	Glucocorticoid receptor agonist	Glucocorticoid receptor agonist	NR3C1	Glucocorticoid receptor agonist	0	-26.38	35.53	-23.77	-41.42	-77.34	-37.81	-61.27	-4.86	-84.65	-17.44	21.07	-86.23	-13.3	-89.68	-60.92	-1.09	67.94	-78.83	38.86	-48.86	-86.34	75.37	-4	-16.44	28.84	-54.24	-61.08	-56.43	-55.73	-56.37	-22.07	1.02	5.57	26.57	-59.68	53.86	-38.13	27.87	-46.15	6.45	17.28	67.37	-26.85
BRD-K90885812	propantheline	Acetylcholine receptor antagonist		CHRM1, CHRM2, CHRM3, CHRM4	Acetylcholine receptor antagonist	0	-82.84	1.87	0	0	-76.86	-64.01	-26.67	-92.13	-45.48	-86.11	-43.42	0	-84.61	-72.9	-15.57	-95.18	-47.95	-95.67	-99.08	-82.8	-72.48	-12.33	-92.34	-42.05	-85.52	-86.11	-72.89	-24.57	-81.81	-49.89	-8.74	-78.99	-81.75	-67.29	-49.3	-81.77	-72.93	-68.26	-76.13	-52.93	-63.03	-74.23	-77.18
BRD-K22009844	phenprobamate	Muscle relaxant			Muscle relaxant	0	-20.83	3.81	-9.95	-7.68	-76.66	-45.21	-18.49	-89.18	14.38	-97.43	21.63	-1.59	-57.16	-50.89	-83.45	-56.96	-91.26	-93.17	-46.73	-81.77	-81.67	-21.79	-80.59	-62.48	-65.09	-54.86	-98.45	-54.8	-49.51	-70.59	-71.27	-69.39	-63.66	-4.12	-70.76	-63.8	-82.05	-90.35	-54.4	21.89	-91.33	-36.06	-94.83
BRD-K30570479	VU-0400195-3	Glutamate receptor modulator		GRM4	Glutamate receptor modulator	0	-79.5	0	-2.36	-16.39	-76.39	-4.83	0	-72	-87.65	-61.95	-22.54	-35.14	-23.86	-66.33	-95.98	-5.78	0	-71.64	-95.39	-25.13	-66.9	-14.41	-81.13	-41.96	-88.77	-95.88	-67.76	-79.82	-85.53	-18.63	-75.53	-13.46	-38.05	-4.76	-62.5	-3.38	-85.94	-96.55	-58.78	-76.05	-98.87	-5.07	-93
BRD-K32107296	temozolomide	DNA alkylating agent		TOP2A	DNA alkylating agent	-1.23	-84.8	-0.84	-15.25	-54.34	-75.95	-78.79	-11.05	-96.56	-41.94	-72.11	-94.81	10.61	1.33	-81.77	-91.29	-66.35	-15.62	-93.4	-92.68	-77.18	-72.91	0.07	-45.65	-67.86	-77.76	-90.8	-73.91	-1.41	-93.69	-58.88	-49.01	-11.18	11.85	-30.06	-83.52	-46.66	-87.15	-46.02	-4.33	-43.84	-97.23	17.35	-93.35
BRD-A80383043	BRD-A80383043	Glutamate receptor agonist		GRM1, GRM2	Glutamate receptor agonist, Glutamate receptor antagonist	0	-89.19	-40.59	-22.19	0	-75.9	-58.56	-20.26	-84.9	0	-28.2	-92.33	37.91	-67.38	-86.59	-91.8	-91.93	-64.14	-94.58	-94.44	-89.64	-86.78	-19.88	-85.96	-37.06	-90.25	-84.73	-79.03	-68.61	-92.09	-80.45	-86.88	-9.49	-20.3	-64.57	-89.76	-90.53	-29.08	-77.43	-74.53	-79.58	-94.83	-84.93	-91.63
BRD-K32836707	CAY-10577	Casein kinase inhibitor			Casein kinase inhibitor	0	-43.08	0	3.77	-31.99	-75.41	-90.21	12.06	-52.43	0	-78.29	39.29	38.19	62.47	-25.85	-84.54	-27.87	81.02	-25.54	-48.02	5.55	-70.56	78.16	70.49	-32.13	44.3	-82.63	-50.89	20.34	-72.08	-55.78	-33.06	8.02	-12.41	11.3	-45.4	6.41	-76.05	-78.85	-6.46	8.25	-41.35	70.69	-94.77
BRD-K29113274	ketoconazole	Sterol demethylase inhibitor	Sterol demethylase inhibitor	AR, CYP19A1, CYP21A2, CYP2C19, CYP3A5, CYP3A7, KCNA10	Sterol demethylase inhibitor	-79.75	-91.5	-39.3	-39.28	0	-75.03	-82.61	-62.11	-83.77	-37.03	-33.02	-75.04	-59.79	-5.02	-19.99	-48.42	27.82	-60.98	-12.03	-94.82	-28.32	-79.33	-76	3.94	-71.67	-92.7	-82.73	-81.91	-23.1	-61.9	-56.9	-28.29	-11.16	70.79	-68.34	-87.42	-77.42	-67.08	-4.5	-28.45	-93.85	-77.81	19.67	-42.9
BRD-A67438293	treprostinil	Prostacyclin analog		PTGIR, CYP2C8, P2RY12, PPARD, PTGDR, PTGER1, PTGER2, PTGER3, PTGER4	Prostacyclin analog	-7.58	-31.77	-7.27	4.5	11.53	-75.01	-82.19	-4.62	-59.39	-61.37	-63.86	-84.56	-16.92	-11.45	-67.7	-61.45	-35.16	-45.31	-74.46	-65.85	-26.83	-27.89	-11.23	-93.03	-62.24	-93.13	-41.97	-59.98	-25.58	-66.63	-38.33	-31.58	0	-41.74	0	-66.86	-27.94	-42.5	-33.96	-20.37	-58.5	-59.33	-42.85	-31.37
BRD-K80431395	triciribine	AKT inhibitor		AKT1, AKT2, AKT3	AKT inhibitor	7.19	30.05	0.49	-42.64	0.85	-75.01	73.89	-26.4	-13.88	-72.58	-52.41	-11.07	-59.57	-53.34	-81.52	-8.6	-28.01	19.27	-61.26	12.87	23.75	-72.39	-8.48	52.99	-73.19	-15.37	-84.63	-23.7	-18.38	-53.69	-19.52	-27.74	-84.23	14.69	-4.86	-48.61	-63.68	-30.7	-18.6	-9.73	-60.05	25.39	21.57	-35.9
BRD-A91699651	chloroquine	Antimalarial		CYP2C8, GSTA2, MRGPRX1, TLR9, TNF	Antimalarial	-5.89	-81.25	-25.15	1.8	5.33	-74.89	-60.57	-42.76	-95.83	-2.64	-89.99	-33.16	-23.02	-25.33	-37.92	-68.04	-52.65	-69.5	-65.61	-79.53	-65.14	-60.04	-35.35	-58.08	-76.53	-84.9	-69.07	-78.54	-9.85	-93.08	-16.66	-32.41	-49.93	-64.47	-35.19	-83.26	-71.22	-84.24	-55.75	-46.08	-89	-84.94	-78.68	-84.01
BRD-K33483813	actarit	Interleukin receptor agonist			Interleukin receptor agonist	0	-88.48	1.79	-63.54	-1.92	-74.58	-77.44	-16.49	-98.84	-92.71	-84.01	-86.94	-53.62	-45.94	-95.95	-86.87	-98.45	-58.13	-87.61	-98.95	-95.88	-63.91	-85.11	-91.37	-98.45	-99.37	-94.19	-95.82	-73.95	-88.41	-74.33	-70.54	-86.9	-97.1	-55.25	-96.61	-62.36	-92.17	-79.63	-89.16	-77.15	-93.53	-87.88	-98.84
BRD-K15600710	obatoclax	BCL inhibitor	BCL inhibitor	BCL2, BCL2L1, MCL1	BCL inhibitor	39.33	13.64	24.67	-79.5	71.96	-74.27	52.94	0	4.33	-30.02	3.88	33.63	0	-78	-72.47	36.45	-14.92	-5.25	6.48	56.48	-5.52	-55.58	-90.2	43.52	-51.96	16.14	-31.81	5.6	-77.15	70.34	-43.49	-4.53	-79.77	-6.45	-37.47	-21.64	-4.93	36.29	-4.27	-66.33	27.35	5.39	-17.62	-16.53
BRD-K39733634	L-161982	Prostanoid receptor antagonist		PTGER4	Prostanoid receptor antagonist, Angiotensin receptor antagonist	-4.3	-54.23	-39.04	-2.04	-19.59	-74.21	16.96	-13.22	33.12	18.23	-44.47	24.96	-2.57	-27.43	-19.23	-13.48	8.06	-4.38	-94.01	-34.9	-80.24	-48.46	18.52	46.08	-16.5	10	-66.08	-23.45	-33.08	-82.28	-18.85	-91.69	23.42	28.02	-34.39	-15.04	-47.15	-32.94	-49.09	-7.86	-9.19	-32.75	-18.72	-34.16
BRD-K11433652	aspirin	Cyclooxygenase inhibitor		PTGS1, PTGS2, TP53, AKR1C1, ASIC3, EDNRA, HSPA5, IKBKB, NFKB1, NFKB2, NFKBIA, PRKAA1, PRKAA2, PRKAB1, PRKAB2, PRKAG1, PRKAG2, PRKAG3, RPS6KA3	Cyclooxygenase inhibitor	-12.7	-73.87	-48.11	-8.74	-7.51	-73.87	-7.95	-49.83	-93.74	0	-70.69	-32.27	0	-16.98	-39.56	-73.89	-41.86	-46.06	-77.31	-55	0	-48.08	-18.73	-31.37	-81	-67.2	-66.83	-39.07	-5.6	-76.39	-81.1	-62.12	-85.18	6.24	-33.9	-61.58	-19.7	-18.95	-36.88	-40.21	-63.14	-92.16	-50.84	-49.63
BRD-K79131256	albendazole	Anthelmintic	Tubulin inhibitor	CYP1A2, CYP2J2, TUBA1A, TUBB, TUBB4B	Anthelmintic, Tubulin inhibitor	-37.03	-96.4	-68.52	1.61	50.53	-73.76	-49.8	-10.96	-91.35	-1.59	-86.97	-95.48	-19.29	-82.86	-62.71	-96.97	-85.53	-61.58	-97.82	-89.65	-64.15	-14.59	-19.87	-36.31	-90.85	-90.08	-96.37	-52.06	-94.45	-93.42	-17.14	-74.19	NaN	8.25	-65.32	-95.7	-83.7	-33.69	-61.97	-6.94	-92.59	-36.83	-90.1	-76.09
BRD-K86727142	embelin	HCV inhibitor		XIAP	HCV inhibitor, XIAP inhibitor	1.58	-29.65	1.97	-90.81	-12.3	-73.05	8.32	-22.14	-24.01	0	-8.36	-6.34	-41.59	-38.77	-1.66	16.64	13.12	-34.98	-11.14	9.58	-14.96	-17.61	-1.62	-15.85	-12.23	14.22	-10.82	23.84	-2.43	-17.86	-58.01	1.66	-58.29	-15.11	-45.43	-4.25	-44.45	-0.95	-7.73	-8.65	-1.62	-58.53	-33.17	-8.97
BRD-K50720187	flupirtine	Glutamate receptor antagonist		KCNQ2, ADRA2A, KCNQ1, KCNQ3	Glutamate receptor antagonist	-26.06	-84.91	-3.56	0	-3.98	-72.85	-58.78	-5.55	-92.03	-68.2	-93.74	-76.5	-49.8	-85.35	-87.29	-96.52	-96.32	-45.89	-98.33	-92.54	-89.79	-95.07	-6.38	-92.04	-94.27	-91.39	-96.1	-97.05	-65.74	-97.92	-50.72	-71.47	-95.04	-74.77	-24.91	-96.36	-84.76	-93.41	-89.39	-77.89	-62.07	-97.13	-89.89	-96.78
BRD-K06198550	isorotenone	Mitochondrial complex I inhibitor		MT-ND1	Mitochondrial complex I inhibitor, NADH-ubiquinone oxidoreductase (Complex I) inhibitor	11.4	-14.26	1.02	-19.24	-1.3	-72.69	-60.12	-23.7	-42.28	-53.74	-19.99	-32.82	-27.72	35.96	-50.2	-1.6	-43.68	-62.1	-42.99	-14.14	-21.99	-38.17	-12.83	-13.71	-18.92	-32.83	-77.01	-46.99	-32.52	-70.53	-52.88	-27.05	-27.04	-13.89	-47.95	22.94	-51.49	-50.54	-18.41	0.94	-12.05	-6.72	7.3	-51.41
BRD-K17415526	tyrphostin-AG-835	Protein tyrosine kinase inhibitor		EGFR	Protein tyrosine kinase inhibitor	-1.44	-9.71	-1.2	83.67	1.87	-72.63	37.83	-11.5	-23.46	9.55	6.79	13.07	-32.17	-19.81	-13.07	2.33	-17	59.68	18.96	-10.7	0	45.06	32.74	-10.11	-18.06	-4.93	-2.92	-16.19	12.62	-24.71	-54.24	55.02	-32.2	-2.78	-20.28	55.7	-43.35	20.92	-44.87	-21.38	-73.95	-10.23	-1.66	-36.2
BRD-K00486786	RO-08-2750	NGF binding inhibitor		NGFR, NGF	NGF binding inhibitor	0	4.53	-0.95	-0.78	0	-72.24	11.33	0.83	-5.08	-2.68	-15.31	19.68	20.84	31.78	-4.02	24.93	3.07	-35.3	0.74	28.87	0.78	55.23	-2.29	23.19	-7.67	1.16	3.9	7.05	-18.91	8.88	10.17	-7.65	-14.1	9.44	-8.61	1.09	7.17	5.46	-4.52	4.29	-6.32	-10.73	-19.79	-6.14
BRD-K38055836	etamivan	Respiratory stimulant			Respiratory stimulant	-21.06	-76.55	-13	10.97	-0.08	-72.1	-82.55	-2.57	-73.54	-80.83	-91.29	-64.01	-26.33	-21.37	-80.83	-69.41	-80.67	-91.46	-95.94	-87.53	-58.52	-71.38	-17.87	-96.82	-60.01	-87.75	-41.91	-69.46	-16.16	-80.14	-67.67	-31.66	-41.33	-85.44	-3.82	-38.97	-31.73	-83.91	-83.64	-70.13	-60.78	-54.51	-48.25	-91.29
BRD-K23922020	arecaidine	Acetylcholine receptor agonist		CHRM1, CHRM2, CHRM3, CHRM4	Acetylcholine receptor agonist	0	-4.23	0	-10.74	3.91	-72.07	-65.51	-36.52	-60.03	-75.97	-78.74	-50.56	-57.58	-68.36	-61.14	-57.1	-46.73	-59.62	-96.93	-79.94	-49.51	-85.56	-8.65	-62.19	-72.4	-66.86	-90.09	-60.97	-7.88	-93.69	-54.97	-35.12	-52.31	-86.93	-58.83	-62.01	0	-87.05	-57.11	-44.49	-85.01	-72.94	-73.84	-90.76
BRD-K43764301	dexketoprofen	Cyclooxygenase inhibitor		CXCR1, PTGS1, PTGS2, SLC5A8	Cyclooxygenase inhibitor	0	-21.01	0	0	20.53	-72.05	12.45	-1.59	-83.43	0	-35.19	-45.66	29.74	-82.91	-27.26	-50.8	-81.67	-3.21	-2.3	-22.5	-17.84	-48.66	-51.09	-35.42	-74.04	-27.5	-36.69	-23.57	3.46	-77.16	-26.81	-17.77	-28.08	-56.21	-45.17	2.71	-34.02	-3.38	-73.92	-78.29	-65.84	-29.57	-22.76	-59.33
BRD-K41859756	NVP-AUY922	HSP inhibitor	HSP inhibitor	HSP90AA1, HSP90AA2, HSP90AB1	HSP inhibitor	68.85	57.89	63.1	-92.45	-0.14	-71.65	21.24	22.27	69.26	-37.4	2.22	7.35	-54.85	-61.37	8.1	-62.37	10.16	81.41	4.47	-42.05	71.96	-30.69	81.57	-21.35	-7.88	77.8	-1.09	-28.9	-49.47	31.39	-35.55	67.27	17.6	11.26	16.26	0.6	84.74	22	2.18	78.94	-67.99	40.15	0	13.15
BRD-K55703048	latrepirdine	Glutamate receptor antagonist		HTR6, GRIN2B, HRH1	Glutamate receptor antagonist	0	-69.45	0	0	-4.83	-71.51	-78.8	-87.97	-98.52	-62.69	-89.57	-36.38	0	0	-84.9	-75.35	-92.81	-86.35	-57.03	-93.33	-88.13	-68.14	-46.59	-89.55	-94.99	-99.01	-96.23	-42.56	-27.4	-87.86	-68.68	-84.26	-68.7	-24.7	-69.59	-83.17	-45.77	-73.76	-64.83	-65.7	-91.28	-93.28	-92.46	-87.87
BRD-K09436313	prostaglandin	Prostanoid receptor antagonist		AKR1C3, PTGDR, PTGDR2, PTGER1, PTGER2, PTGER4, PTGFR	Prostanoid receptor antagonist	-52.89	-67.43	-29.44	3.21	-58.83	-70.97	-51.11	-10.08	-5.74	-3.31	-55.44	-25.39	-14.53	-3.63	-16.99	-56.41	-58.85	25.94	-86.38	-62.93	-79.13	-68.89	42.32	-70.35	-85.96	-71.01	-93.99	-54.8	-53.04	-97.61	-5.81	-69.88	-34.17	-29.64	-49.31	-74.28	-60.57	-83.45	-55.42	-33.39	-17.73	-69.92	-54.68	-88.82
BRD-K54790157	trioxsalen	DNA synthesis inhibitor			DNA synthesis inhibitor	-0.88	-41.18	0.85	2.69	0.88	-70.88	-64.96	-79.24	-58.36	-26.63	-44.22	-79.52	-44.15	3.31	-45.67	-62.13	-40.01	-18.89	-65.61	-85.81	-31.01	-36.44	27.16	-36.01	-41.06	-77.38	-72.92	-11.64	-29.55	-52.11	-50.86	-70.76	-4.3	-38.71	-19.28	-60.97	-63.81	-59.36	-41.52	24.66	-43.38	-55.26	-24.84	-35.58
BRD-A24228527	ofloxacin	Bacterial DNA gyrase inhibitor		TOP2A	Bacterial DNA gyrase inhibitor	0	-72.27	7.65	0	-11.21	-70.31	-58.47	-61.25	-61.43	-75.99	-86.2	-70.15	-17.26	-88.13	-74.79	-76.3	-84.4	-31.91	-90.69	-95.86	-91.45	-83.41	-19.89	-94.11	-75.32	-95.79	-92.09	-54.79	22.87	-90.64	-82.19	-70.75	-69.01	-87.01	-20.93	-58.28	-87.56	-69.35	-74.14	-38.63	-46.9	-82.91	-68.66	-93.66
BRD-A35338386	NECA	Adenosine receptor agonist	Adenosine receptor agonist	ADORA1, ADORA2A, ADORA2B, ADORA3, HSP90B1	Adenosine receptor agonist	-9.68	-92.37	-36.92	33.68	3.52	-70.23	-4.58	-75.66	-65.32	-7.61	-77.81	-37.39	-3.03	-51.67	-31.09	-76.43	-40.19	11.15	-89.56	-64.68	-86.8	-6.03	51.2	-57.17	-51.37	-19.27	-78.11	-81.93	-3.98	-73.37	-31.28	-46.93	0	-8.66	25.37	-57.4	42.92	-37.07	-52.43	51.43	-43.98	-80.66	24.4	-53.75
BRD-K64785675	TG100-115	-666		PIK3CG, PIK3CA, PIK3CB, PIK3CD	-666	0	-22.8	-1.87	-17.17	1.68	-70.22	-49.48	-91.48	-79.61	-46.41	-80.79	-85.35	-46.67	-65.65	-80.15	-93.07	-89.58	-61.55	-77.64	-97.78	-97.1	-98.93	-24.95	-79.95	-72.98	-89.01	-81.06	-82.04	9.36	-90.53	-76	-86.41	-44.65	-65.3	-39.16	-63.87	-59.59	-73.08	-84.07	-84.52	-66.93	-47.76	-28.17	-90.67
BRD-K26997899	SA-792574	Microtubule inhibitor	Tubulin inhibitor	TUBB	Microtubule inhibitor	-2.02	-88.84	-30.97	61.78	8.93	-70.07	26.06	-1.23	23.59	-3.07	29.51	-56.96	9.02	-33.08	-22.76	-69.62	-27.06	-12.79	-54.16	-17.99	-52.05	5.61	-53.07	21.36	-43.68	-45.37	-19.11	96.79	-94.39	-26.71	-19.48	-96.19	-1.8	47.49	-11.8	-39.07	-23.98	-35.07	14	29.3	-53.56	1.77	22.68	-13.82
BRD-K12002134	megestrol	progesterone receptor agonist	Progesterone receptor agonist	PGR	progesterone receptor agonist	0	-8.38	0	0	-26.49	-69.87	-77.64	-47.96	-54.57	-56.51	-61.68	38.09	-12.96	-55.47	-55.11	-57.09	-57.53	36.71	-11.38	62.89	-7.35	22.28	22.77	-77.6	-35.79	46.55	-57.88	4.94	0	-41.92	-82.33	-4.23	28.27	19.52	36.67	18.62	14.33	-80.52	-40.56	36.54	-49.64	23.95	27.41	36.4
BRD-K25906698	immepip	Histamine receptor agonist		HRH3, HRH4	Histamine receptor agonist	0	-28.81	1.52	-1.44	14.12	-69.61	13.3	32.13	-70.21	-2.54	-75.74	-62.34	-50.79	-49.68	-35.77	-55.95	45.17	-39.94	-86.37	-70.88	13.96	28.5	-50.83	33.79	-50.62	55.79	-82.43	-33.1	-2.4	-49.85	53.55	-25.87	-64.71	-28.91	-2.82	65.03	-46.23	-74.68	-68.59	22.45	-88.2	-50.94	-40.46	-74.86
BRD-K40255344	tyrphostin-A9	Protein tyrosine kinase inhibitor			Protein tyrosine kinase inhibitor, Tyrosine kinase inhibitor	32.52	64.29	43.91	-80.45	-5.25	-68.73	84.75	23.29	24.87	0	25.71	66.02	-23.27	-52.52	2.33	68.91	55.89	0	59.89	69.04	65.9	15.26	-74.93	50.13	-29.88	71.29	-46.07	26.88	8.97	72.05	4.83	43.59	-47.3	3.92	-39.24	19.59	38.38	51.55	8.67	7.5	45.04	68.31	34.01	57.74
BRD-K17294426	clebopride	Dopamine receptor antagonist		DRD2, ACHE	Dopamine receptor antagonist	10.21	-31.27	36.85	-2.96	-15.28	-68.43	-36.47	-12.81	-80.54	-29.96	-5.32	-52.85	-20.18	-71.18	-59.24	-84.32	-40.35	-32.76	-77.21	-63.15	-67.6	-30.61	-79.87	-56.8	-34.72	-59.62	-31.06	-42.31	-11.24	-17.49	-36.67	-48.67	-13.04	-93.68	-13.45	-77.24	-7.84	-37.21	19.61	-76.33	-54.92	-41.22	-33.86	-46.28
BRD-K93095519	SJ-172550	MDM inhibitor	MDM inhibitor	MDM4	MDM inhibitor	-63.39	-93.91	-21.9	12	0	-68.41	-75.77	-2.73	-96.42	-60.67	-94.61	-87.75	-48.27	-81.76	-89.83	-91.21	-96.4	-80.8	-97.75	-99.65	-89.59	-96.01	-51.2	-94.8	-77.48	-99.08	-96.91	-91.74	-23.74	-97.29	-89.45	-62.3	-65.92	-83.72	-47.07	-80.32	-80.19	-96.16	-91.66	-85.33	-91.58	-95.25	-87.76	-96.16
BRD-K83289131	CAY-10618	NAMPT inhibitor		NAMPT	NAMPT inhibitor	0	-18.84	0	-70.9	-42.65	-68.4	-52.04	-43.89	-1.33	-18.81	-70.1	-15.88	-75.86	-58.34	-58.57	5.22	5.36	0	-1.27	-39.83	-18.92	-22.72	-85.52	5.92	-84.95	-48.59	-15.62	-45.43	-27.12	11.43	-54.21	-45.39	-24.67	-0.78	-31.39	-59.04	-42.19	-2.47	-54.96	-79.61	32.38	16.05	8.83	-1.87
BRD-A79803969	memantine	Glutamate receptor antagonist		GRIN1, CHRFAM7A, CYP2E1, DRD2, GRIN2A, GRIN2B, GRIN3A, HTR3A	Glutamate receptor antagonist	-42	-85.78	-38.26	0	-17.97	-68.19	-73.89	-40.2	-95.29	-85.85	-42.95	-52.22	-83.74	-63.15	-90.72	-91.75	-96.19	-22.23	-50.16	-74.84	-61.65	-72.57	20.43	-81	-72.05	-84.61	-78	-71.68	-65.11	-69.46	-88.63	-49.73	-22.28	-23.3	-57.21	-90.75	-18.28	-87.02	-27.93	-73.36	-73.18	-85.22	-59.58	-71.5
BRD-K83972459	JWE-035	Aurora kinase inhibitor	Aurora kinase inhibitor	AURKA	Aurora kinase inhibitor	0.42	57.86	2.3	-93.65	-33.22	-67.41	69.06	21.68	91.57	-2.54	75.11	21.92	-3.13	36.65	24.56	27.82	73.97	-30.49	68	16.71	13.76	47.02	-85.18	-3.57	34.1	81.67	30.04	2.4	-13.15	60.29	-2.98	56.85	-58.99	12.82	-18.3	2.4	4.09	44.17	14.06	61.71	53.54	30.5	50.38	75.09
BRD-K53790871	triamcinolone	Glucocorticoid receptor agonist	Glucocorticoid receptor agonist	NR3C1, CYP3A5, CYP3A7, SERPINA6	Glucocorticoid receptor agonist, Corticosteroid agonist, Immunosuppressant	0	-45.07	-13.76	-9.37	-5.07	-67.11	16.47	-38.04	-67.81	-95.1	71.42	4.19	-31.67	57.77	40.81	-57.27	-57.94	44.03	45.39	-24.67	23.96	-39.59	-7.41	-63.62	-36.8	-46.25	77.09	-41.72	-82.31	-22.86	-45.84	-38.07	4.67	-3.77	6.07	34.99	19.72	-49.13	26.57	-38	62.01	-63.59	43.54	-42.31
BRD-K99411983	lumicolchicine	Colchicine isomer, non-binder of microtubules			Colchicine isomer, non-binder of microtubules	3.12	0.53	0.35	-0.46	9.66	-66.87	-50.35	-7.75	-8.22	-0.42	-10.55	5.2	-0.63	-46.58	-68.97	-10.34	-9.42	7.45	-46.8	-3.42	-23.21	-25.6	-39.96	-19.23	-27.46	-27.64	-7.91	-19.35	5.25	-15.7	-76.71	-20.47	-10.07	1.9	-0.67	15.11	-23.12	-11.7	-7.89	-7.66	-32.34	-20.35	-13.85	-11.86
BRD-A55815733	phylloquinone	Vitamin K		BGLAP, GGCX	Vitamin K, Gamma carboxylase enzyme	0	-92.38	0	0	-43.8	-66.31	-44.2	-41.51	-78.94	-69.21	33.83	0	-37.75	-53.95	18.62	-42.89	-74.53	-82.58	-43.45	-89.58	-57.99	-62.41	13.38	-38.94	-72.04	-50.04	-95.24	-76.09	-35.72	-58.41	-21.21	-32.22	-49.78	-48.14	-27.32	-37.05	-55.2	-34.78	-69.72	0	-73.68	-49.52	-83.24	-60.03
BRD-A69636825	diltiazem	Calcium channel blocker		CACNA1C, CACNA1S, CACNA2D1, CACNG1, CYP3A5, CYP3A7, HTR3A, KCNA5	Calcium channel blocker	-40.36	-66	-13.62	-28.83	-15.35	-66.01	-28.06	-10.4	-61.3	-51	-88.99	-11.65	-20.18	-55.3	-46.32	-33.63	-51.4	-4.73	-72.63	-81.3	-25.15	-31.29	5.24	-76.39	-14.64	-40.25	-60.15	-66.73	-4.87	-59.58	-19.55	-36.69	12.38	-24.48	6.17	-57.73	-22.25	-13.38	-21.89	-34.82	-34.18	-63.71	-38.81	-24.4
BRD-K05926469	lenalidomide	Antineoplastic		CRBN, TNF, CDH5, PTGS2, TNFSF11	Antineoplastic	0	-89.4	-6.48	0	4.02	-65.76	-65.12	-5.58	-93.12	-4.86	-89.78	-78.47	-26.39	-88.03	-92.26	-86.5	-69.28	-30.68	-95.68	-97.26	-83.64	-81	-16.78	-46.77	-74.67	-93.12	-98.34	-99.61	-57.79	-94.74	-82.77	-67.32	-18.64	-43.79	-3.73	-93.13	-84.69	-96.61	-80.17	-47.03	-79.34	-91.24	-74.91	-88.4
BRD-A25775766	securinine	GABA receptor antagonist		GABRA1	GABA receptor antagonist, TP53 activator	-82.08	-92.84	-90.11	49.66	39.47	-65.68	-74.72	-54.95	-41.61	-13.57	-58.95	7.9	-69.43	-36.52	-3.77	20.46	-62.61	20.94	-74.95	-40.89	-23.5	-60.2	-17.64	14.09	-56.47	-63.95	-72.39	-57.31	-81.54	-13.25	-2.01	-47.39	-40.62	-71.64	-2.88	-35.46	-28.57	-74.16	-23.12	-38.4	-91.78	2.22	-81.47	-73.87
BRD-K06878038	deferiprone	Chelating agent		CYP4F2	Chelating agent	0	-22.54	0	-29.12	-6.48	-64.98	-79.64	-70.18	-92.25	-25.48	-94.59	-92.18	-40.75	-92.66	-7.06	-92.22	-83.75	-61.86	-98.69	-66.29	-79.2	-56.86	-24.11	-78.59	-54.64	-97.36	-78.36	-75	-80.27	-92.78	-44.68	-76.66	-37.27	-6.64	-56.03	-54.4	-87.39	-94.38	-89.28	-94.25	-66.49	-89.32	-38.96	-92.76
BRD-K70401845	erlotinib	EGFR inhibitor	EGFR inhibitor	EGFR, NR1I2	EGFR inhibitor	65.22	65.4	51.89	-75.94	13.34	-64.96	-2.5	65.82	22.97	1.02	24.62	64.81	2.71	80.39	34.86	6.85	31.66	14.69	41.1	58.74	17.85	57.73	40.71	-7.72	29.87	48.83	-10.49	-14.67	14.62	18.19	5.22	1.62	-14.53	-14.44	2.85	84.25	24.75	4.05	28.37	-34.77	52.68	-9.46	-5.25	27.48
BRD-K60184833	tyrphostin-46	Tyrosine kinase inhibitor		EGFR	Tyrosine kinase inhibitor	0	0	2.22	-2.15	-3.21	-64.91	59.75	32.56	-22.91	20.31	26.07	30.4	7.93	27.72	19.43	-23.25	14.46	23.33	-23.81	7.29	1.23	-11.67	-2.18	5.54	16.65	22.86	-3.59	-14.75	-2.15	43.19	42.78	-5.92	-54.55	40.62	1.41	59.78	1.62	12.66	-26.02	15.82	21.64	-11.03	26.01	39.16
BRD-K02607075	tubocurarine	Acetylcholine receptor antagonist		CHRNA2, HTR3A, ACHE, HTR3B, KCNN1, KCNN2, KCNN3, ZACN	Acetylcholine receptor antagonist	0	-25.64	0	-9.19	-6.83	-64.54	0	-22.8	37.41	-44	-38.01	-16.21	0	10.87	4.69	-2.36	6.16	13.25	-16.74	-36.39	-49.1	4.86	-1.87	25.45	-43.22	-53.01	-49.8	20.25	12.97	-40.16	-44.14	-14.38	-17.8	8.65	15.47	-7.71	-66.26	26.02	12.94	-13.64	11.99	-47.24	0	-24.16
BRD-K24576554	AT-9283	JAK inhibitor	Aurora kinase inhibitor	AURKA, AURKB, ABL1, BCR, FLT3, JAK2, JAK3, RPS6KA6, STK17A	JAK inhibitor, Aurora kinase inhibitor, ABL inhibitor, BCR-ABL kinase inhibitor, FLT3 inhibitor, Mitotic inhibitor, Protein kinase inhibitor	0	-61.12	-1.37	13.81	-6.41	-64.2	48.84	-14.22	-27.63	-15.14	-84.54	-42.34	8.32	-47.9	-53.35	38.02	85.93	9.48	63	53.37	60.34	-7.91	0	20.41	-17.76	-35.13	-39.73	92.79	-77.72	68.16	-7.3	-75.04	-51.79	26.23	-4.86	-8.28	94.19	-92.32	-16.57	53.45	-51.34	-23.97	89.37	66.01
BRD-A11007541	BCI-hydrochloride	Protein phosphatase inhibitor		DUSP1, DUSP6	Protein phosphatase inhibitor	-1.09	-21.03	-72.27	60.42	-68.25	-64.09	72.74	-6.16	-10.92	-21.53	1.34	48.71	-1.34	-62.44	43.7	67.92	-2.78	54.14	73.34	12.73	1.41	7.97	9.32	66.96	-38.02	-12.73	-4.07	60.91	-64.12	-12.96	-41.11	-1.66	0	-2.33	0	-25.53	0	9.35	8.84	-13.75	-7.87	0	2.04	-16.32
BRD-A92439610	triamcinolone	Glucocorticoid receptor agonist	Glucocorticoid receptor agonist	NR3C1, CYP3A5, CYP3A7, SERPINA6	Glucocorticoid receptor agonist	0	-8.99	0.42	-4.52	-76.24	-64.03	-58.91	-5.11	-13.51	-49.88	0	4.55	-1.56	-40.39	-31.57	-21.31	-20.69	4.55	-26.98	-14.16	-15.47	-58.1	6.1	-30.11	-21.26	-4.43	14.36	-38.22	-11.87	-11.88	-79.08	-6.66	-4.3	-0.67	-60.68	-8.17	-4.45	-31.01	7.46	-5.62	-23.22	-22.87	70.68	-36.44
BRD-K15262564	mupirocin	Isoleucyl-tRNA synthetase inhibitor			Isoleucyl-tRNA synthetase inhibitor	-29.73	-92.83	-36.06	-37.27	-15.45	-63.94	-89.07	-25.27	-79.42	-38	-83.87	-55.26	-77.89	-23.38	-67.65	-70.89	-80.75	-32.85	-91.51	-93.77	-81.66	-91.5	-42.81	-82.4	-83.75	-87.39	-90.65	-52.1	-48.45	-96.91	-61.48	-74.98	-56.37	-55.37	-46.13	-61.3	-82.55	-63.33	-36.88	-68.3	-77.66	-87.3	-73.16	-80.5
BRD-K26373640	IKK-2-inhibitor	IKK inhibitor		IKBKB	IKK inhibitor, SYK inhibitor	0	-91.83	-3.95	59.12	-2.86	-63.57	-85.29	-37.35	-56.16	-82.85	-58.57	-43.1	-13	-55.3	-37.82	-62.63	-75.45	-3.98	-82.23	-67.43	-66.23	-52.33	-27.64	-78.22	-45.6	-77.05	-51.56	-54.14	-2.67	-77.25	-2.78	-9.44	-73.52	-26.84	-38.39	-31.69	-31.98	-71.8	-45.48	-26.72	-69.1	-63.32	-17.61	-49.58
BRD-K87510569	RS-504393	CC chemokine receptor antagonist		CCR2, CCL2	CC chemokine receptor antagonist	0	-16.18	-3.74	2.85	-19.54	-63.14	-37.83	35.86	-60.12	37.97	-69.76	1.94	3.91	-70.91	-49.29	-49.23	65.31	-12.84	38.97	54.09	19.33	21.26	-2.92	23	-46.29	45.44	-15.72	3.59	29.57	54.97	-32.05	-21.02	-61.05	3.84	0	-41.29	19.04	32.33	37.21	45.66	-33.12	22.07	13.43	-60.87
BRD-U08759356	EI-346-erlotinib-analog	EGFR inhibitor		EGFR	EGFR inhibitor	0	-1.8	-3.59	-2.33	63.26	-62.93	84.38	1.52	44.27	0	23.22	2.02	-1.97	-1.68	-2.96	27.7	14.73	48.33	13.32	-19.13	4.02	-38.47	0	21.61	-9.16	42.31	2.36	1.76	3.07	23.73	1.8	-21.21	1.83	-13.42	-1.76	23.35	41.37	11.04	16.88	23.49	-20.38	56.1	-1.8	-11.05
BRD-K63265447	docetaxel	Tubulin inhibitor	Tubulin inhibitor	TUBB, BCL2, MAP2, MAP4, MAPT, NR1I2, TUBB1	Tubulin inhibitor	-2.23	-79.53	0.95	1.09	12.16	-62.7	25.75	32.85	-65.46	21.92	57.07	76.26	4.97	44.32	-86.24	-32.73	79.59	28.49	-87.66	36.83	85.3	89.29	-1.44	88.48	-92.53	76.59	-62.44	88.43	-88.09	-66.47	57.03	-45.04	-80.44	83.25	2.53	15.49	20.41	72.04	70.32	72.32	34.69	-86.29	48.07	85.17
BRD-A71009679	KUC103420N	-666			-666	1.44	-65.41	1.52	7.96	2.15	-62.61	-52.58	-14.2	-9.3	-32.42	-2.85	-2.54	-24	9.73	-36.93	22.36	-66.58	-3.59	-14.32	-36.75	-23.98	-3.56	15.69	-38.11	-4.09	-51.6	-84.19	-67.09	-15.7	-63.15	-9.81	-7.77	-85.37	-50.03	-18.62	2.4	-8.83	-73	-78.8	-66.48	-56.71	-48.76	24.75	-74.03
BRD-K44094599	tacrolimus	Calcineurin inhibitor		FKBP1A, CYP3A5, CYP3A7	Calcineurin inhibitor	-1.07	-71.41	-31.65	-11.27	-28.03	-62.34	-54.05	-65.71	-71.45	-18.07	-54.41	28.94	-7.89	-33.78	-59.88	-49.96	-31.05	-42.32	-27.06	-65.07	-16.26	-45.39	-80.09	-51.35	-78.74	-52.77	-65.01	-83.82	-64.27	-63.97	-78.34	-56.87	-25.46	-75.88	-61.39	-61.28	-19.32	-40.99	-36.22	-30.04	-71.11	-21.29	-82.84	-52.94
BRD-K60230970	MG-132	Proteasome inhibitor	Proteasome inhibitor	PSMB1	Proteasome inhibitor	78.4	9.55	32.01	71.84	-66.96	-61.94	80.49	0	62.48	16.27	42	19.05	-3.17	2.23	63.27	86.57	5.92	79.82	81.86	64.01	82.08	53.94	2.85	77.56	0	43.86	-0.88	67.01	-69.77	48.55	-2.04	9.54	-0.95	59.9	0	27.87	44.59	21.05	33.73	60.92	-10.61	77.67	69.2	-20.81
BRD-K63630713	etacrynic-acid	Sodium/potassium/chloride transporter inhibitor		SLC12A1, ATP1A1, SLC12A2	Sodium/potassium/chloride transporter inhibitor	-5.62	-25.44	0.95	-1.66	-0.11	-61.93	47.03	-37.81	36.42	-2.68	20.6	-1.02	-1.66	-95.02	-30.66	18.61	3.32	8.62	-15.33	-45.76	-17.09	-42.81	59.48	7.72	-43.06	12.92	-84.88	-39.2	-34.65	-30.98	-23.1	-9.18	-48.4	1.35	-1.3	-47.16	-81.78	26.71	-74.35	-2.75	-9.97	-38.6	-7.72	5.74
BRD-K14791739	fluticasone	Glucocorticoid receptor agonist	Glucocorticoid receptor agonist	NR3C1, CYP3A5, CYP3A7, NR3C2, PGR, PLA2G4A	Glucocorticoid receptor agonist	0	-25.2	0	-55.31	-47.55	-61.92	-47.4	-84.95	-94.55	7.61	-79.2	-46.44	0	14.51	-47.94	-56.85	-65.49	72.63	-72.14	8.53	-7.06	-41.75	62.73	-76.29	35.35	-81.79	-61.86	-81.87	-9.1	-48.46	-28.37	-66.49	-5.26	6.34	-55.94	-85.08	-32.36	-57.46	-72.07	-91.89	-69.24	-48.78	-5.44	-91.84
BRD-K98426715	tubacin	HDAC inhibitor		HDAC6	HDAC inhibitor	10.15	-36.67	0	0	-4.18	-61.78	-56.77	-77.63	-73.87	-81.81	-55.16	32.47	-43.65	-65.31	-30.13	-81.68	-86.98	-38.67	-71.65	-63.06	-82.93	-90.13	42.95	-85.84	-65.98	-85.78	-69.09	-54.89	3.87	-89.66	-90.27	-30.97	3.52	-72.81	0	-5.47	-36.43	-35.11	-6.59	-51.22	-46.14	-48.13	-64.12	-88.13
BRD-K61737877	VEGF-receptor-2-kinase-inhibitor-IV	VEGFR inhibitor		KDR	VEGFR inhibitor	-24.74	-45.14	12.98	70.21	22.86	-61.64	-59.78	-58.66	-45.15	-63.31	-67.71	-60.18	-69.05	-54.13	-28.71	-47.84	-31.07	38.41	-53.8	-61.37	-61.84	-36.9	29.39	-31.54	-53.62	-63.28	-73.68	-74.43	-8.33	-79.87	18.42	-9.18	23.39	-70.65	-0.14	-18.14	14.24	-64.56	-59.82	41.3	-28.24	-31.43	-50.81	-74.76
BRD-K77390737	xanthohumol	ATPase inhibitor		CYP19A1, VCP	ATPase inhibitor	-37.78	-48.99	-84.02	65.3	2.27	-61.31	-31.15	-22.67	-83.22	-4.66	-62.85	-65.08	37.32	-46.09	-4.79	11.64	-42.49	15.14	-61.15	-25.75	-24.82	-49.17	-15.77	-35.07	-83.16	-42.71	-81.73	-11.12	-73.26	-48.43	-4.72	-15.78	-78.31	-1.69	-33.2	-56.53	-39.9	-63.53	-91.47	-77.99	-61.15	-18.42	-47.12	-85.21
BRD-K74112339	acetohydroxamic-acid	Urease inhibitor			Urease inhibitor	-0.89	-28.88	-1.56	-11.21	-6.74	-60.89	-43.32	-28.03	-13.55	-0.25	-59.09	-8.75	-28.54	-27.28	-34.81	-25.89	8.59	-11.36	-85.04	-33.85	-10.72	-21.02	1.29	-11.9	-6.16	-26.37	-20.17	-35.69	-11.51	-50.22	-34.78	-54.73	-7.08	14.52	-9.94	6.21	-7.79	-25.16	4.32	-34.93	-39.24	-36.98	-42.03	-34.39
BRD-K89687904	PKCbeta-inhibitor	PKC inhibitor		PRKCB	PKC inhibitor	0	-93.27	0	99.26	0	-60.87	-98.98	-27.8	-97.22	1.06	-88.23	-90.08	86.6	61.08	-87.19	-86.64	-97.77	50.26	-84.3	-84.02	-96.3	-67.75	-90.21	-89.96	-63.24	-99.05	-75.11	-39.63	-62.25	-98.42	-22.98	-96.25	-74.08	-69.77	-90.84	-65.58	-52.38	-93.86	-85.86	-96.37	-84.71	-74.11	-87.83	-98.92
BRD-K08273968	griseofulvin	Tubulin inhibitor		KRT12	Tubulin inhibitor	-25.79	-91.25	-10.11	7.34	-65.37	-60.51	-89.34	-91.05	-91.72	-89.71	-92.23	-82.4	-73.78	-43.98	-88.77	-80.5	-83.1	-90	-96.92	-95.14	-84.37	-88.82	-42.51	-88.43	-94.79	-97.37	-91.73	-59.88	-61.83	-94.62	-71.07	-78.9	-38.23	-78.84	-32.92	-85.12	-75.39	-97.67	-74.14	-56.69	-82.62	-93	-63.78	-92.36
BRD-A07780951	orciprenaline	Adrenergic receptor agonist	Beta-adrenergic receptor agonist	ADRB2	Adrenergic receptor agonist	-3.24	-74.25	4.76	1.23	-69.64	-60.33	-28.83	2.8	-37.01	-7.98	-29.19	38.76	52.61	11.61	-4.66	-27.26	-6.59	8.72	-77.94	1.34	-9.39	2.33	17.37	5.25	-31.48	-29.61	-59.1	-32.3	-10.19	-23.53	-0.35	-20.2	-10.17	2.33	-11.7	-14.4	-18.55	-39.36	-21.38	2.75	-27	5.18	28.49	-12.93
BRD-A91555231	norepinephrine	Adrenergic receptor agonist		ADRA1A, ADRA1B, ADRA1D, ADRA2A, ADRA2B, ADRA2C, ADRB1, ADRB3, ADRB2, DRD1, DRD5, PAH, SLC18A1, SLC18A2	Adrenergic receptor agonist	0	-93.6	-89.26	7.96	-26.82	-60.31	-24.72	-85.57	-69.02	-28.22	-92.33	-83.03	-25.13	-66.1	-84.73	-86.29	-84.67	-16.47	-80.59	-93.22	-82.37	-91.18	-33.16	-92.61	-87.91	-92.3	-89.95	-70.19	-46.55	-91.34	-87.82	-46.92	-32.37	-74.16	-40.56	-84.62	-21.13	-64.06	-51.58	-8.05	-88.93	-98.99	-87.28	-96.56
BRD-A15010982	HU-211	Glutamate receptor antagonist		CNR1, CNR2, GLRA1, GLRA2, GLRA3, GPR55, GRIN1, NFKB1	Glutamate receptor antagonist	0	24.44	0	-26.08	-5.5	-60.26	43.47	0	13.9	-75.47	3.88	27.31	-32.11	10.44	16.04	52.87	8.1	-3.7	32.57	51.33	-21.53	-31.63	-80.46	21.33	-28.89	-10.41	-9.64	30.41	-46.63	6.05	3.84	0	-33.7	45.68	-47.33	18.79	9.13	20.73	-70.53	0	22.77	14.15	8.57	-6.92
BRD-A32161980	carbetocin	Oxytocin receptor agonist		OXTR	Oxytocin receptor agonist	0	-81.85	0	0	2.85	-60.13	-91.04	-41.62	-92.28	-8.64	-79.05	-96.43	-44.15	-94.63	-86.93	-90.25	-94.82	-98.03	-97.99	-98.03	-86.63	-82.44	3.7	-96.16	-71.2	-97.36	-96.83	-72.57	-49.28	-94.2	-76.73	-62.05	-8.23	-96.83	-30.56	-91.63	-75.92	-67.48	-86.21	-76.21	-88.58	-92.62	-91.76	-86.25
BRD-K80396088	gliquidone	Sulfonylurea	KCNJ11 modulator	ABCC8, KCNJ10, KCNJ11, KCNJ8	Sulfonylurea	0	-23.36	0	-1.46	-2.15	-59.98	-89.71	13.26	-56.56	-31.09	-22.01	-54.77	-10.6	-4.51	-81.14	-19.29	-46.69	-75.55	-50.98	-55.77	-88.94	-59.17	-20.33	-64.2	-67.33	-72.34	-40.95	-13.42	-34.55	-53.8	11.64	-44.98	4.98	-50.75	31.25	-77.69	-43.55	-49	-35.59	-21.61	-40.24	-50	-31.63	-85.92
BRD-K44432556	VU-0418946-1	HIF modulator	HIF activator	HIF1A	HIF modulator	17.03	69.89	51.76	-82	0	-59.59	84.36	77.4	67.61	2.6	65.22	74.34	11.26	0	-2.78	86.15	72.3	6.51	83.71	83.21	79.3	22.65	3.21	67.49	1.86	86.38	17.67	75.56	-2.26	82.83	8.88	91.02	-1.13	7.55	-58.94	70.69	10.35	73.88	44.79	20.29	68.39	73.35	75.86	76.5
BRD-K78294846	osthol	Calcium channel blocker			Calcium channel blocker	-64.03	-19.66	-7.86	-11.76	-22.25	-59.12	-9.34	-26.61	-9.46	-27.96	-37.19	9.75	-20.14	-8.98	-17.09	-12.9	-14.42	-3.91	-18.34	-35.09	-13.72	-38.13	21.87	-10.49	-40.27	-71.43	-28.85	-34.99	-12.28	-16.04	-3.14	-25.59	-19.59	-8.64	0.81	-8.57	-42.13	-10.46	-45.76	-31.46	-45.83	-32.09	-1.09	-58.04
BRD-A55484088	BNTX	Opioid receptor antagonist		OPRD1, OPRK1, OPRM1	Opioid receptor antagonist	0	-36.62	-37.96	0	-34.89	-58.98	80.35	0	69.92	-8.01	29.91	23.39	28.55	-57.69	66.29	74.88	77.64	19.32	76.72	55.88	-4.91	0	-34.24	65.86	-4.48	29.21	0	36.96	-76.42	47.46	-51.01	0	0	6.38	11.31	-21.03	46.61	49.58	2.47	32.49	9.12	80.73	12.19	25.26
BRD-K80970344	pyrrolidine-dithiocarbamate	NFkB pathway inhibitor	NFkB pathway inhibitor	HSD11B1, RELA	NFkB pathway inhibitor	-0.32	2.29	-0.85	14.08	-1.2	-58.82	21.98	-42.55	-3.88	-0.67	15.5	13.68	0	-48.6	24.93	65.38	-1.16	62.35	8.47	13.73	0	-49.63	0	27.68	-33.46	-3.88	-61.29	12.21	-80.22	-1.09	-72.46	-30.77	-8.64	10.9	-1.13	-28.77	7.64	7.98	-15.97	-31.2	-70.01	-15.97	-43.45	-20.67
BRD-K09638361	SA-63133	-666	Tubulin inhibitor	CSNK1E, CSNK1A1, CSNK1D, CSNK1G2	-666	-1.59	-4.93	-1.94	66.47	33.17	-58.74	-26.1	4.09	34.93	1.44	67.76	-76.46	21.14	47.02	-19.93	-85.15	-47.66	2.61	-60.31	40.38	-52.74	-47.94	-52.68	83.34	-52.09	-20.04	-64.51	73.94	-69.93	-10.56	26.46	-86.95	-1.97	68.45	-47.62	-74.6	-87.03	-4.74	16.02	16.13	-55.92	22.85	3.15	33.91
BRD-K26117720	gingerol	Nitric oxide synthase inhibitor			Nitric oxide synthase inhibitor	-12.99	-41.65	-8.36	13.74	1.06	-58.55	-16.63	-0.92	-13.72	0	7.75	2.3	-4.47	-1.06	-5.32	8.97	0.78	-20.68	8.01	-0.67	1.48	19.72	-1.02	4.43	-36.66	-4.31	-22.29	-1.66	-13.81	14.49	2.4	8.51	-1.97	-3.64	0	-13.44	0.85	-4.48	4.38	-57.31	-15.68	-0.81	1.8	5.35
BRD-K31912990	CGP-71683	Neuropeptide receptor antagonist		NPY5R	Neuropeptide receptor antagonist	3.46	67.02	0	-19.27	-49.92	-58.53	88.55	60.44	79.03	38.7	22.15	56.63	-2.18	-61.33	56.01	63.25	48.01	35.99	79.34	79.61	81.94	34.36	-47.26	54.1	32.74	80.54	48.34	67.82	61.66	78.95	21.9	72.79	0	-18.87	-3.77	32.38	48.88	74.15	76.92	50.11	66.07	84.44	15.25	68.14
BRD-K23623876	decafluorobutane	Contrast agent		GRM5	Contrast agent	-21.4	-32.66	1.3	2.15	-1.16	-58.38	-73.54	-29.78	-42.9	-19.45	-48.75	-33.43	-40.44	-26.18	-38.59	-46.5	-31.39	2.96	-57.36	-47.65	-64.08	-67.81	2.68	-25.21	-19.43	5.15	-33.42	-54.57	-30.61	-24.44	-21.84	-19.94	-51.48	1.59	-13.1	-27.09	-2.08	-12.92	-65.39	8.78	-1.62	-68.56	19.24	-38.25
BRD-K37312348	kenpaullone	CDK inhibitor	CDK inhibitor, Glycogen synthase kinase inhibitor	GSK3B, CDK1, CDK5, CCNB1, CDK2, LCK	CDK inhibitor, Glycogen synthase kinase inhibitor	3.52	-20.08	5.07	97.5	-2.04	-58.33	23.54	25.08	-54.57	0	-3.49	-71.97	-19.76	63.42	-47.77	46.46	-28.39	2.96	59.86	87.59	8.96	47.99	-24.47	3.31	0	-69.4	-2.33	82.73	43.44	46.46	33.95	-74.89	-2.37	0	2.01	47.52	8.65	-62.38	-15.13	-89.07	19.46	-58.68	25.86	-44.48
BRD-K54095730	CMPD-1	p38 MAPK inhibitor		GNRHR, MAPK14	p38 MAPK inhibitor	0	1.26	0	0	5.73	-58.29	50.33	1.14	33.98	2.47	-4.91	-24.58	-2.11	15.86	2.03	65.08	-7.81	1.55	21.56	69.57	63.33	67.89	-3.74	12.61	69.56	9.97	7.24	90.69	-23.06	6.5	12.44	-1.87	-36.88	5.8	17.69	-6.47	-1.63	25.93	38.43	0	-14.81	15.4	59.96	18.54
BRD-K51318897	fenbendazole	Tubulin inhibitor	Tubulin inhibitor	CYP2C19, CYP2D6, CYP2J2, CYP3A4, TUBB	Tubulin inhibitor	-11.78	-93.78	-3.39	11.79	12.27	-57.96	-24.41	-33.61	-70.38	-3.45	-30.24	-87.11	19.29	-5.04	-74.9	-93.04	-27.65	-44.5	-95.15	-93.78	-77.65	-66.65	-72.35	-38.91	-87.48	-95.77	-97.15	-46.99	-97.64	-90.56	-64.17	-92.57	-2.78	42.78	-34.64	-90.74	-93.68	-79.81	-73.19	-30.34	-93.94	-86.78	-39.33	-89.18
BRD-K83636919	entacapone	Catechol O methyltransferase inhibitor		COMT	Catechol O methyltransferase inhibitor	0	-25.56	0	0	-17.79	-57.46	-26.99	-57.87	-7.52	-36.51	-85.49	18.13	-71.86	-78.8	-46.98	-26.84	-15.56	-36.3	-39.99	-92.18	0	-60.84	0	-75.9	-82.57	-61.71	-61.45	-26.36	-21.25	-75.09	-67.15	-44.56	-9.86	22.69	-57.2	-78.38	-30.24	-23.35	-44.8	24.77	-83.95	-44.77	-31.13	-46.93
BRD-K01779529	fluoropyruvate	Pyruvate dehydrogenase kinase inhibitor			Pyruvate dehydrogenase kinase inhibitor	-1.8	-97.2	-2.18	2.26	-10.1	-57.38	-97.46	-62.08	-94.61	-63.15	-96.75	-41.92	-42.01	-50.79	-91.73	-96.78	-84.01	-53.26	-97.5	-99.58	-78.02	-52.86	-9.7	-92.76	-67.68	-99.65	-96.92	-96.92	-78.25	-98.6	-85.25	-84.75	-25.62	-37.72	-34.36	-79.03	-88.85	-99.15	-81.5	-79.67	-97.89	-98.1	-93.81	-98.43
BRD-K03981224	ethisterone	Progestogen hormone		TYR	Progestogen hormone	-4.6	-26.44	0	2.33	25.77	-56.95	9.57	-38.53	-19.81	-65.3	-15.08	-18.11	13.97	40.59	-51.17	-55.91	-41.52	-47.81	-68.54	-50.98	-34.97	-4.33	-36.53	-42.08	-28.02	-57.73	-48.32	32.44	-74.74	40.03	-66.61	-81.02	-65.28	48.56	-9.5	-48	-43.69	-43.21	-35.89	-46.32	31.47	-44.29	-4.62	-35.21
BRD-K65786282	CGP-7930	GABA receptor modulator		GABBR1	GABA receptor modulator, GABA receptor positive allosteric modulator	0	-70.02	0	-31.29	18.83	-56.4	-29.36	-66.62	-8.91	-33.85	-49.63	1.37	-23.71	-57.86	-66.49	-50.91	-45.55	-35.5	-22.03	-26.4	-59.76	-54.73	-7.4	-19.57	-56.94	-28.44	-54.8	-66.97	-59.14	-82.28	-40.55	-42.62	-68.73	-20.75	-24.68	-41.17	-11.94	-66.47	-74.43	-91.38	-66.48	-51.07	-36.39	-89.44
BRD-K64857848	XMD-885	Leucine rich repeat kinase inhibitor	Leucine rich repeat kinase inhibitor	LRRK2, MAPK7	Leucine rich repeat kinase inhibitor, MAP kinase inhibitor	0	-1.87	2.08	-42	-4.3	-56.29	-2	-86.28	57.81	-91.82	10.52	-82.29	-95.58	-16.79	-38.09	-6.28	7.53	-3.63	23.32	-44.53	-38.72	-3.56	-96.55	-70.58	-3.56	32.27	2.15	-33.23	-76.61	-2.15	-61.6	-3.31	-94.66	-79.4	-88.28	0	-24.74	-17.36	1.83	8.84	-15.54	-7.87	0	0
BRD-A92670106	tocainide	Sodium channel blocker		SCN5A	Sodium channel blocker	0	-23.71	-4.47	-1.37	14.63	-56.17	-71.3	-4.09	-88.12	-34.16	-48.9	-35.35	-23.49	17.16	-67.95	-2.8	2.61	-66.22	-56.57	-74.15	-63.19	-67.48	-16.18	18.44	-19.18	-90.21	-3.1	-69.9	1.91	-66.46	-39.19	-88.06	-26.77	13.43	-13.54	-18.02	39.4	1.23	-2.71	21.15	2.64	-68.63	-50.33	-66.84
BRD-K65814004	diphenyleneiodonium	Nitric oxide synthase inhibitor		ALDH1A2, ALDH2, ALDH5A1, ALDH7A1, NOX3, XDH	Nitric oxide synthase inhibitor	0	62.11	0	-77.35	1.69	-55.79	65.26	-5.71	32.94	-27.56	32.68	15.95	-1.2	-92.4	-50.08	45.55	28.47	13.24	72.87	34.75	84.48	10.64	-18.44	63.93	-19.01	17.09	-16.26	79.59	-52.26	69.35	-33.7	-1.52	-25.87	77.42	-32.94	-34.75	12.2	24.14	32.68	16.67	21.44	32.39	82.75	41.93
BRD-A22380646	pantoprazole	ATPase inhibitor		ATP4A, CYP2C19, CYP3A4	ATPase inhibitor	-0.97	-76.74	-0.78	-3.24	-2.15	-55.51	-78.62	-14.75	-83.04	-21.03	-82.67	-72.63	2.82	-22.91	-63.03	-78.96	-88.99	-45.19	-92.99	-89.85	-92.46	-76.16	-4.97	-25.19	-68.07	-98.06	-73.91	5.51	-30.22	-84.87	-31.52	-62.02	-29.98	-50.11	-20.89	-73.77	-28.7	-93.9	-48.08	-87.04	-77.31	-84.54	-84.16	-91.39
BRD-K91370081	anisomycin	DNA synthesis inhibitor		NHP2L1, RPL10L, RPL11, RPL13A, RPL15, RPL19, RPL23, RPL23A, RPL26L1, RPL3, RPL37, RPL8, RSL24D1	DNA synthesis inhibitor	57.03	48.53	10.46	-86.32	-20.3	-55.19	86.3	17.43	42.13	-94.47	0	41.27	-84.07	-79.73	75.54	35.44	50.7	-87.36	62.04	46.5	17.98	-42.3	-97.25	38.9	-65.81	78.24	28.04	91.4	-81.35	18.04	-47.04	64.16	-27.99	12.71	-26.49	-34.04	45.06	35.05	-30.02	72.39	-46.61	56.31	25.24	-59.21
BRD-K96670504	lonidamine	Glucokinase inhibitor		GCK	Glucokinase inhibitor	-13.64	-76.28	-1.64	54.55	-42.58	-54.7	-30.2	-28.4	-45.83	-53.77	-82.04	-37.94	-21.61	-53.48	-46.66	-71.21	-70.96	-31.56	-91.68	-91.08	-49.64	-34.88	-14.86	-74.22	-67.79	-49.29	-82.55	-73.63	-29.51	-33.53	-41.49	-45.46	1.59	-26.01	-55.21	-46.74	-63.23	-81.46	-58.89	-80.18	-57.97	-94.85	-37.51	-41.66
BRD-K97330509	SRC-kinase-inhibitor-II	SRC inhibitor			SRC inhibitor	-14.78	-56.69	-20.94	1.8	41.27	-53.94	-34.9	-77.64	-75.14	-65.77	-56.49	-18.05	-44.9	-18.14	-93.2	-40.03	-50.77	-47.73	-91.07	-95.12	-48.38	-31.29	-48.37	-54.82	-69.67	-92.87	-91	-64.39	-35.3	-82.31	-50.03	-39.6	-37.35	-2.08	-24.12	-75.82	-51.51	-84.76	-54.15	-70.2	-86.68	-72.16	-68.95	-85.59
BRD-K09859624	methantheline	Acetylcholine receptor antagonist		CHRM1, HRH2	Acetylcholine receptor antagonist	0	-92.8	-41.76	56.4	-1.06	-53.88	-76.28	-69.95	-95.32	-18.72	-74.25	-67.1	-37.3	-28.62	-70.54	-93.85	-93.93	-70.55	-84.87	-94.59	-49.24	-87.67	0	-93.88	-92.12	-90.57	-95.8	-65.12	-53.29	-81.88	-82.65	-57.49	-64.53	-37.64	-16.94	-87.96	-50.38	-85.21	-74.07	-96.46	-93.59	-99.12	-79.76	-90.86
BRD-K97764662	PD-173074	FGFR inhibitor	FGFR inhibitor, VEGFR inhibitor	FGFR1, FGFR3, FGFR2, FGFR4, FLT1, FLT4, KDR, PDGFRA, PDGFRB	FGFR inhibitor, VEGFR inhibitor	0.02	16.82	0.22	-29.74	29.91	-53.86	-10.03	-17.73	-64.13	-0.28	-76.98	-17.49	-0.28	-17.71	-66.31	-33.55	-50.52	-0.56	2.04	-42.79	-33.08	-17.25	-7.79	-80.84	-75.41	-18.01	-85.18	-49.5	-2.96	-41.34	-0.99	-7.17	-29.56	-48.95	-25.6	-7.35	-50.53	-53.89	-1.3	-7.56	-1.55	2.89	-46.92	-58.68
BRD-K28360340	TW-37	BCL inhibitor	BCL inhibitor	BCL2, BCL2L1, MCL1	BCL inhibitor	63.97	55.01	81.29	-63.9	-60.91	-53.02	77.68	59.79	33.6	7.97	16.07	27.2	0.81	-30.82	-22.33	72.5	32.22	58.21	56.61	83.57	47.11	24.69	0	51.3	4.27	45.2	2.82	89.5	0	81.3	-52.94	86.12	-6.21	24.89	-46.97	69.76	-20.64	45.27	45.82	20.09	54.56	65.29	74.29	53.91
BRD-K36737713	AG-957	Protein tyrosine kinase inhibitor		ABL1, EGFR	Protein tyrosine kinase inhibitor	-79.83	-25.33	-21.73	62.89	-37.41	-53	41	10.55	10.23	0.42	71.37	20.46	-38.45	1.59	2.43	79.2	-1.92	66.55	43.34	8.33	24.6	-62.8	0.53	68.43	-4.75	6.42	-29	0.7	-7.98	-6.24	-2.04	-43.28	-27.42	-47.1	34.06	-1.37	32.58	26.36	-11.39	6.34	-29.11	40.84	-21.2	-42.68
BRD-K34995470	SU-1498	VEGFR inhibitor		ERBB2, KDR	VEGFR inhibitor	0	-1.66	0.81	-3.31	0	-52.64	-18.45	-21.83	-18.14	-1.69	-29.09	-5.33	8.78	-27.4	-22.23	-9.38	-49.67	-1.43	-40.97	-27.03	-11.27	-22.16	-40.63	-54.36	-21.82	-65.04	-18.12	7.56	-23.83	-27.36	-7.32	1.16	-21.58	-47.24	-21.09	-12.88	-17.85	-22.42	-14.12	-76.3	-76.12	-61.29	-38.79	-40.78
BRD-K57926513	tyrphostin-AG-1295	PDGFR receptor inhibitor		FLT3, KDR, PDGFRA, PDGFRB	PDGFR receptor inhibitor	-14.62	-81.16	-5.63	54.17	-4.87	-52.58	-69.28	-70.73	-95.27	-3.03	-80.72	-88.16	-46.38	-52.6	-88.66	-84.56	-96.21	4.9	-96.87	-95.03	-88.74	-94.47	35.59	-75	-50.29	-99.3	-92.66	-65.28	-78.45	-96.06	-94.87	-78.78	-23.03	-40.99	-54.27	-89.62	-81.97	-80.82	-82.86	-92.25	-69.3	-96.15	-60.02	-95.88
BRD-K23566484	nilutamide	Androgen receptor antagonist		AR, CYP2C19	Androgen receptor antagonist	0.21	-32.84	0.28	-9.37	-0.42	-52.46	-2.04	0	-55.05	-0.67	-26.24	22.49	-15.5	34.79	-1.52	-1.3	-11.8	-28.59	1.94	-3.91	-13.63	-42.36	1.44	-14.82	-29.5	-26.96	-3.88	-8.1	28.16	-17.29	-30.79	29.31	-23.15	-8.03	24.95	-38.05	8.99	2.01	1.69	15.25	4.86	-71.68	8.47	-20.99
BRD-A34806832	proscillaridin	ATPase inhibitor	ATPase inhibitor	ATP1A1	ATPase inhibitor	0.32	52.42	0	-79.76	56.12	-52.26	48.51	-9.93	41.71	-79.32	-2.61	5.57	-39.13	-39.53	12.05	28.57	22.98	-86.69	60.15	-23.34	30.07	3.02	-93.61	53.18	-82.24	33.91	-16.67	52.44	-8.85	0.75	-63.88	68.66	-37.82	-4.33	-54.4	16.71	29.71	38.02	-0.92	0.35	5.18	22	-5.16	-11.07
BRD-K30189597	SYK-inhibitor	SYK inhibitor		SYK	SYK inhibitor	12.42	21.96	0	-13.5	15.23	-52.1	3.81	2.26	24.47	-28.44	-41.91	33.41	-1.65	55.98	-48.94	-83.46	23.15	-13.45	14.18	41.73	-16.89	-60.33	19.34	58.86	-30.29	38.11	-72.04	-22.58	-21.46	26.04	-59.58	-56.55	-21.96	-1.59	-42.03	29.12	68.85	11.04	-22.11	18.92	-15.17	2.43	23.07	-16.92
BRD-K66944906	fraxidin	Carbonic anhydrase inhibitor		CA1	Carbonic anhydrase inhibitor	-2.36	-47.57	-20.81	1.97	26.94	-52.06	-25.07	12.96	-22.53	-8.08	-75.84	0	-41.89	-58.85	-72.57	-45.67	-43.39	-49.1	-32.61	-60.38	-53.7	-41.58	-17	-61.95	-52.09	-51.35	-50.85	-35.47	-29.78	-54.43	-2.43	-27.83	-39.54	-61.14	0	-29.84	-41.58	-44.34	-11.47	-26.63	-23.95	-43.32	-1.48	-57.85
BRD-K12762134	XAV-939	Tankyrase inhibitor		TNKS, TNKS2	Tankyrase inhibitor	-14.05	-18.23	-19.69	0	-4.19	-51.84	-44.77	-35.76	9.46	-7.29	-19.95	7.38	-40.47	-31.22	-54.6	-14.92	-17.81	-31.86	-79.24	-31.68	-28.62	-94.21	52.18	-13.01	0.78	-47.56	-51.97	-35.91	24.33	-72.59	-47.35	-67.15	-48.66	-34.26	8.05	-14.51	-12.91	-18.75	-25.23	-40.4	-11.27	-46.4	-47.84	-18.91
BRD-A75935363	atracurium	Acetylcholine receptor antagonist		CHRNA2	Acetylcholine receptor antagonist	0	1.26	0	2.8	-13.6	-51.64	23.82	-16.2	35.47	5.04	9.12	63.59	24.18	12.19	-55.49	1.2	-25.92	7.96	-34.02	-56.96	-48.38	-43.66	87.25	-25.47	-7.58	36.19	-25.75	-39.8	22.81	-74.24	29.6	-56.07	-56.61	9.2	25.14	3.45	-13.28	36.08	-38.77	73.7	62.4	39.86	27.79	-43.21
BRD-K78280988	anandamide	Cannabinoid receptor agonist	Cannabinoid receptor agonist	CNR1, CNR2, TRPV1, CACNA1G, CACNA1H, CACNA1I, GLRA1, GPR119, GPR18, GPR55, KCNA2, KCND3, KCNK3, KCNK9, TRPM8	Cannabinoid receptor agonist	-1.34	-2.78	0	-51.93	-1.87	-51.46	-49.9	-51.69	12.39	-45.12	-35.24	53.65	-14.84	-20.25	-54.15	-50.38	-24.75	-37.8	-15.15	-47.88	-75.16	-77.75	-12.6	-24.82	-2.75	-50.18	-44.06	-4.85	-17.56	-21.35	61.42	-28.09	-8.15	-60.66	31.5	13.86	-13.46	-41.31	-43.22	-22.7	-2.82	-60.48	-14.82	-45.4
BRD-K70976396	cefoxitin	Bacterial cell wall synthesis inhibitor			Bacterial cell wall synthesis inhibitor	0	-83.48	0	0	3.31	-51.29	45.24	47.66	68.23	14.12	70.51	-34.41	8.19	38.08	85.66	-21.97	41.36	0	39.7	50.35	13.52	-14.99	29.4	78.43	-19.39	71.49	69.56	71.27	0	65.98	89.93	13.68	-27.91	25.52	43.31	65.8	0	53.34	50.68	-17.44	89.68	62.65	-40.85	76.7
BRD-K01253243	SB-590885	RAF inhibitor	RAF inhibitor	BRAF	RAF inhibitor	-1.09	4.28	0	-69.84	-3.14	-51.16	-39.87	-39.04	11.45	-18.73	-13.24	-23.79	2.08	3.21	-62.54	-25.96	1.48	4.64	1.06	-10.5	-5.81	-39.42	-1.09	-1.02	-49.41	27.21	-33.74	-24.27	0	17.71	-3.59	-60.81	-65.64	5.73	-1.8	8.28	2.18	-7.83	3.17	10.65	-6.39	-24.46	0	3
BRD-A28105619	cucurbitacin-i	JAK inhibitor		JAK2, STAT3	JAK inhibitor, Lipocortin synthesis stimulant, STAT inhibitor	0.67	20.9	0	-26.61	0	-50.72	88.14	0.88	79.07	0	48.07	58.08	32.51	0	0.63	79.49	42.43	24.1	75.55	85.35	64.84	0	-63.2	86.16	-43.11	76.36	-0.7	41.46	-21.77	79.6	-6.1	43.42	-37.41	43.17	0.88	-45.81	31.03	71.61	12.17	65.73	72.49	79.65	46.11	48.91
BRD-K29653726	topiramate	Carbonic anhydrase inhibitor		CA2, CA4, GRIK1, CA1, CA12, CA7, CYP2C19, CYP3A4, GABRA1, GABRA2, GABRA3, GABRA4, GABRA5, GABRA6, GABRB1, GABRB2, GABRB3, GABRD, GABRE, GABRG1, GABRG2, GABRG3, GABRP, GABRQ, GRIA1, SCN1A, SCN5A	Carbonic anhydrase inhibitor, Glutamate receptor antagonist, Kainate receptor antagonist	-3.75	-56.16	-17.54	8.3	4.71	-50.46	-41.67	13.62	-32.05	14.81	36.1	65.87	-37.48	82.13	-58.27	-71.06	-61.96	-26.89	-43.47	-45.47	-69.22	19.54	-2.48	-41.81	-68.1	-52.7	-72.26	-75.65	-42.32	8.74	47.31	-80.98	-29.18	-14.02	6.34	-12.55	-36.68	-47.84	-59.08	-40.97	-59.25	4.86	-17.55	-50.78
BRD-K72816382	cinalukast	Leukotriene receptor antagonist		CYSLTR1	Leukotriene receptor antagonist	0	-40.96	13.5	-25.49	-33.43	-50.42	-75.6	-42.11	-89.01	-27.06	-78.91	-20.45	-15.09	-32.25	-50.68	-54.81	-20.98	-10.46	-69.05	-60.85	-47.93	-60.54	-62.64	-53.75	-80.19	-55.5	-68.98	-47.12	-7.6	-73.38	-75.14	-15.89	-43.57	-24.78	-42.43	-36.22	-28.58	-41.53	-24.34	-20.39	-92.91	-75.85	-20.57	-55.94
BRD-K93618743	ipriflavone	Bone resorption inhibitor			Bone resorption inhibitor	72.53	2.22	28.35	-38.11	25.47	-50.36	-30.69	-37.44	-30.16	-31.58	-34.02	10.04	-31.08	-18.24	-12.47	-26.23	-15.79	16.79	-40.37	-19.75	9.58	24.6	8.07	-52.9	-14.48	15.79	-6.51	-8.92	-26.46	13.08	-5.94	-7.86	-18.45	-3.31	-1.17	-14.06	-6.05	-1.23	-11.27	-9.74	-10.71	-7.86	31.07	-13.71
BRD-K76907295	VU-0418947-2	HIF modulator	HIF activator		HIF modulator	0	72.67	11.35	-74.3	0	-50.15	83.51	75.22	49.56	8.29	56.77	70.36	47.18	-12.62	60.79	82.64	66.79	52.33	80.19	81.82	76.9	13.24	0	66.85	4.07	79.99	41.39	79.66	-23.86	85.93	0	87.44	-39.29	16.37	-58.03	80.38	16.99	69.03	32.12	38.19	38.02	79.89	57.08	71.78
BRD-K17349619	HLI-373	MDM inhibitor	MDM inhibitor	MDM2	MDM inhibitor	-7.24	-95.33	-1.59	-71.54	26.52	-49.7	-31.09	-43.02	-97.46	-53.74	-42.85	-68.31	9.58	-90.92	-95.26	-95.43	-72.72	-93.68	-79.6	-81.17	-1.62	-68.02	1.23	-63.83	-85.73	-78.78	-77.99	-88.99	-28.8	-91.16	-78.31	-70.79	-58.2	-82.24	-70.21	-78.3	-57.76	-83.42	-56.14	-45.27	-83.96	-89.75	-82.43	-90.4
BRD-K83322645	L-693403	Sigma receptor agonist		DRD2, SIGMAR1	Sigma receptor agonist, Sigma receptor antagonist	0	-7.08	0	-1.2	-17.25	-49.28	-33.02	-6.18	-37.94	-46.53	-54.99	10.3	-21.43	-39.11	-31.74	-57.22	-21.62	-0.74	-45.69	-76.32	-30.32	-41.28	-1.16	-45.79	-21.46	-66.72	-64.44	-35.29	-14.58	-32.23	-20.2	-35.47	-16.46	-10.24	-12.41	-24.85	-9.67	-20.3	-37.12	-35.32	-38.08	-78.03	-10.11	-24
BRD-K61177364	NBI-27914	CRF receptor antagonist		CRHR1	CRF receptor antagonist	0	-31.18	-0.88	16.89	-6.48	-49.24	10.58	4.65	-11.27	40.97	-58.69	0	-35.86	1.46	1.2	-17.19	0.85	0	-21.82	-29.18	-13.11	20.2	-1.87	-2.22	-29.54	-68.33	6.73	-1.59	6.26	-29.79	-70.5	-62.24	0.85	2.04	35.88	-23.45	13.72	-16.11	-2.01	46.34	-13.95	-12.21	-13.16	-15.75
BRD-A42553870	L-152804	Neuropeptide receptor antagonist		NPY5R	Neuropeptide receptor antagonist	0.92	-8.56	0.88	-0.92	12.57	-49.11	-31.32	0	-20.89	0.88	-7.78	-6.49	0.92	7.38	-10.29	-18.71	6.41	-1.23	-5.73	-8.14	-9.64	-1.05	-1.03	-8.97	-11.87	-19.12	10.48	-22.54	-0.88	-9.5	-10.17	-37.46	-1.41	7.83	-6.41	6.92	8.73	-28.34	-29.57	5.33	-8.04	5.56	21.42	-11.71
BRD-A87387433	cefpodoxime	Bacterial cell wall synthesis inhibitor			Bacterial cell wall synthesis inhibitor	4.02	35.66	11.96	-7.95	-0.81	-49.07	-13.97	22.57	14.45	4.23	-27.67	20.85	-28.41	11.32	-1.16	-23.93	-31.55	-1.94	2.54	15.15	27.97	16.8	-57.58	-7.49	7.19	2.43	13.49	9.18	5.35	22.85	9.44	-0.81	33.88	22.74	0.78	48.31	-20.63	1.16	12.76	1.97	18.27	-16.46	48.1	6.77
BRD-A52650764	ingenol	PKC activator	PKC activator	PRKCD, PRKCE	PKC activator	-43.35	-41.42	-2.15	-54.16	-3.14	-49	57.11	-17.53	-1.83	-70.72	-26.43	8.41	-57.42	-88.16	-34	82.09	-17.92	0	8.28	86.78	49.56	-19.34	-2.75	78.46	-31.63	-21.15	-49.69	67.25	-97.01	57.16	-48.51	2.51	-89.3	0	-73.15	-64.38	-48.05	23.29	45.52	-58.75	-53.82	-2.26	21.77	70.16
BRD-K94070024	depomedrol	Glucocorticoid receptor agonist	Glucocorticoid receptor agonist		Glucocorticoid receptor agonist	0	-40.53	0	-4.72	-95.21	-48.94	-90.49	-67.76	-21.87	-38.01	-91.47	-22.15	-40.11	-6.94	-49.12	-77.36	-61.14	5.39	-57.21	-21.59	-29.27	-77.61	4.02	-46.16	-38.13	-67.44	-41.9	-17.62	-94.5	-86.21	-69.99	-76.14	-28.07	0	-57.85	-76.42	7.08	-81.24	-9.37	-55.28	-13.88	-42.54	-7.44	-15.58
BRD-A97104540	fenoterol	Adrenergic receptor agonist	Beta-adrenergic receptor agonist	ADRB2, ADRB1, ADRB3	Adrenergic receptor agonist	0	-84.91	-0.56	14.78	-18.06	-48.81	-26.72	-39.78	-89.79	-24.48	-36.84	8.88	-59.73	-4.19	-73.31	-88.58	-63.52	-27.58	-83.34	-93.95	-56	-45.92	-11.1	-62.28	-75.62	-53.62	-66.24	-65.97	-66.25	-84.8	-27.26	-38.71	-7.76	-34.08	-0.67	-69.14	-23.79	-63.9	-59.16	-73.23	-73.14	-55.91	-8.54	-56.76
BRD-K07996107	harpagoside	Acetylcholinesterase inhibitor		ACHE	Acetylcholinesterase inhibitor	0	-54.69	0	0	-3.1	-48.73	-45.31	-77.25	-71.21	0	-41.22	-39.76	-15.37	-7.95	-81.45	-55.78	-87.25	12.78	-70.76	-34.87	-45.14	-39.59	-82.2	-48.46	-55.93	-98.24	-73.57	-32.12	-45.37	-60.99	-73.55	-73.88	-33.53	-21.27	-13.38	-79.18	5.69	-24.71	-68.99	-71.2	-43.59	-75.44	-26.16	-57.58
BRD-K92984783	melperone	Serotonin receptor antagonist		DRD2, HTR1A, HTR2A	Serotonin receptor antagonist, Dopamine receptor antagonist	-0.25	-67.59	-0.25	25.24	-2.08	-48.17	-42.3	-61.07	-80.68	-8.38	-55.24	-5.5	-28.96	-40.03	-61	-75.98	-66.01	-21.75	-68.74	-84.38	-32.38	-76.16	-3.66	-59.3	-53.44	-67.27	-72.65	-74.28	-15.99	-39.23	-48.55	-47.7	-36.06	-15.45	-37.88	-47.76	-25.37	-46.48	-80.31	-75.01	-61.12	-85.28	-52.33	-74.27
BRD-A79314293	cephalosporanic-acid	Bacterial cell wall synthesis inhibitor			Bacterial cell wall synthesis inhibitor	0	-23.66	0	-83.46	-10.51	-48.13	-31.21	14.88	-13.92	-8.9	9.52	7.27	-37.73	-13.97	6.06	-9.67	0	10.99	-18.65	-35.35	6.64	-14.82	8.88	-13.94	-34.41	-6.31	18.79	-16.23	-66.7	0	-77.16	-11.45	-43.68	10.59	7.33	30.28	-9.03	6.1	-23.14	-8.56	-18.36	-19.22	-34.84	-9.71
BRD-A54927599	KF-38789	P-selectin inhibitor		SELP	P-selectin inhibitor	-0.95	-4.69	0	1.37	68.85	-48.03	-26.23	-0.49	-6.39	-7.72	15.99	-61.38	1.97	-29.14	-50.37	19.35	-16.03	0.78	-8.48	28.97	-45.17	-1.48	-76.37	28.66	-5.23	-31.21	-41.11	58.8	-86.08	-14.08	-43.9	-73.88	-0.78	1.49	-2.01	-85.08	-59.19	-51.4	10.19	-15.4	-42.07	18.84	-0.63	-18.07
BRD-K14329163	BAY-K8644	Calcium channel activator		CACNA1C	Calcium channel activator, L-type calcium channel activator	-61.78	-89.96	-75.67	64.74	-1.97	-47.68	-92.05	-3.19	-7.65	-1.62	-72.81	-63.52	35.84	-0.95	-80.12	-34.49	-40.98	-30.43	-99.12	-58.66	-85.45	0	65.35	-58.35	-52.54	-97.39	-38.5	-34.98	9.27	-86.57	-67.25	-83.59	-26.3	-21.43	-1.34	-52.18	-43.51	-69.38	-37.34	-58.49	-26.59	-84.63	-60.35	-51.07
BRD-A82096673	KU-C103428N	CDC inhibitor		NFE2	CDC inhibitor, Rho associated kinase inhibitor	0	-6.33	1.06	-5.74	6.38	-47.63	25.08	5.88	-5.5	-3.2	14.93	-21.56	-35.18	-3.88	52.41	4.05	12.83	6.82	-4.26	21.97	51.71	-6.34	0	15.47	-20.73	1.76	-64.95	-39.1	3.03	15.84	0.67	39.52	-13.17	-18.46	1.44	0	43.09	1.44	3.85	16.14	-8.86	-11.14	16.95	-9.11
BRD-A08003242	rhodomyrtoxin-b	sodium fluorescein uptake inhibitor			sodium fluorescein uptake inhibitor	41.58	82.97	56.95	-84.44	46.46	-47.55	87.49	59.57	30.32	0	55.66	55.09	-13.25	-22.07	8.93	77.49	67.87	0	74.87	86.68	74.09	17.74	-83.22	70.98	38.03	83.69	71.44	62.34	26	77.63	61.57	51.94	-8.94	16.8	-54.9	70.65	64.77	78.29	69.56	17.29	68.03	84.83	49.08	61.15
BRD-A02180903	betamethasone	Glucocorticoid receptor agonist	Glucocorticoid receptor agonist	NR3C1	Glucocorticoid receptor agonist, Anti-inflammatory	-0.67	-47.68	-0.93	-10.6	-58.9	-47.33	-89.34	-84.06	-95.75	-66.22	-88.05	-55.48	-79.83	-56.06	-90.92	-91.97	-81.44	-53.22	-54.87	-96.05	-28.51	-76.18	-46.55	-85.43	-70.04	-95.14	-85.72	-67.05	-38.1	-93.55	-69.55	-37.37	-56.87	-78.22	-43.17	-80.56	-72.33	-89.94	-65.75	-30	-92.6	-92.39	-82.84	-91.37
BRD-K45542189	diethylcarbamazine	Lipoxygenase inhibitor		ALOX5, PTGS1	Lipoxygenase inhibitor	-0.56	-57	-13.74	8.13	1.06	-47.3	-64.2	-11.83	-45.96	-23.31	-64.58	-30.1	-44.32	-1.62	-53.03	-36.13	-42.16	-42.42	-64.5	-63.56	-53.61	-24.59	-4.58	-49.37	-83.94	-41.02	-55.18	-37.47	-7.3	-73.64	-55.73	-56.69	0	22.82	-10.01	-36.54	-40.97	-78.2	-37.82	-30.89	-62.04	-53.57	-20.86	-82.08
BRD-K01436366	XMD-1150	Leucine rich repeat kinase inhibitor	Leucine rich repeat kinase inhibitor	LRRK2	Leucine rich repeat kinase inhibitor	3.98	6.87	2.64	-51.67	-27.56	-47.01	26.76	-26.41	59.07	-3.95	75.32	-29.5	-94.36	25.25	-52.33	-1.04	15.75	-47.28	13.64	6.69	0	4.02	-97.99	2.56	2.68	46.65	42.53	-3.31	-46.46	12.88	-26.77	3.91	-88.91	-40.86	-2.57	1.87	-4.15	-12.05	6.7	4.93	0	-38.03	-18.33	8.18
BRD-K83063356	RS-102895	CCR antagonist		CCR2	CCR antagonist	0	23.21	0.32	-22.76	-65.36	-46.91	-4.99	-9.78	-14.69	-13.82	20.17	14.01	-3.03	-34.29	-49.04	7.37	-24.16	-14.85	-66.32	-50	2.79	-29.47	-5.57	8.24	-33.75	2.85	-17.31	-2.64	-26.01	-21.2	-46.35	-6.03	-22.56	43.3	-9.36	-54.92	-16.35	-15.95	5.57	-49.07	7.07	-29.06	-24.84	13.5
BRD-K91315211	betahistine	Histamine receptor agonist		HRH3, HRH1	Histamine receptor agonist, Histamine receptor antagonist	-10.38	-81.74	-26.69	13.79	-25.18	-46.9	-47.84	-18.73	-56.14	8.92	-45.94	-24.04	-35.98	-8.24	-46.36	-27.02	-43.83	-77.45	-25.7	-40.69	-56.78	-32.65	-15.64	-38.49	-83.78	-43.01	-63.78	-77.6	-11.1	-42.89	-54.43	-32.14	-19.71	-36.43	-13.29	-37.21	-31.87	-42.96	-60.15	-52.36	-42.67	-71.15	-22.39	-52.12
BRD-K16977723	PP-3	EGFR inhibitor			EGFR inhibitor	0.78	-20.71	0	-5.61	-2.43	-46.84	-17.92	-2.43	-76.02	-34.32	-36.35	18.06	-1.87	-51.76	-19.78	-30.41	-8.14	-41.78	-20.78	-55.01	-29.42	-16.74	10.92	-77.87	-15.83	-63.9	-40.93	-56.04	-14.88	-50.18	-69.25	-15.06	-48.83	13.31	-19.3	-65.83	-52.14	-18.74	-13.56	-1.97	-10.51	-13.35	-22.1	-17.36
BRD-A45333398	periplocymarin	Apoptosis stimulant			Apoptosis stimulant	5.23	50.77	16.04	-87.76	87.35	-46.84	50.7	-17.33	49.73	-74.49	-11.94	21.07	-50.24	-24.29	-34.05	-0.92	4.08	-5.56	16.77	-8.25	-4.16	-35.28	-94.96	19.63	-72.36	24.76	-6.18	0	-67.17	0	-58.1	-23.67	-74.99	0	-62.17	26.35	-6.65	23.23	-25.5	-1.87	34.37	3.91	-9.52	-23.97
BRD-K67445247	flurofamide	Urease inhibitor			Urease inhibitor	0	-30.55	-1.39	-10.39	-17.04	-46.81	-1.09	-6.27	-60.71	-14.92	-20.9	-65.28	-2.61	-70.38	-12.29	-62.16	-17.03	-40.66	-62.34	-64.77	-70.48	-73.39	-1.27	-13.65	-43.68	-45.24	-88.67	-34.2	26.72	-66.55	-17.49	-17.75	-57.47	-1.91	-30.38	-6.27	-1.87	-57.6	-68.62	2.22	-59.71	-50.87	4.47	-88.26
BRD-K28120222	parthenolide	NFkB pathway inhibitor		ADIPOR2, IKBKB, RELA	NFkB pathway inhibitor	-66.99	-74.29	-21.86	0	-5.88	-46.73	-40.37	-79.04	-28.29	0	0	-3.26	-43	-71.32	-5.85	6.27	-33.93	86.38	-62.82	-61.62	-73.18	-83.59	4.84	21.36	-38.68	-47.02	-76.31	-34.37	-92.56	-64.96	-82.69	-83.55	-81.81	-3.66	0	-92.14	-6.19	-71.14	-84.31	-71.86	-44.75	0	-13.02	-83.26
BRD-K47869605	podophyllotoxin	Microtubule inhibitor	Tubulin inhibitor	IGF1R, CASP3, TOP2A, TUBA4A, TUBB	Microtubule inhibitor, Tubulin inhibitor	-0.56	-25.64	-1.44	5.04	65.41	-46.62	23.92	-2.75	54.05	5.4	44.46	17.6	-23.49	4.33	-16.92	21.39	-17.46	-64.95	6.1	86.51	-38.79	44.73	-52.34	55.61	-14.27	-6.2	-8	79.22	-94.23	5.56	49.85	-89.65	1.68	84.54	-34.06	-11.67	-67.28	8.2	13.21	62.25	62.28	44.19	22.3	35.86
BRD-K13819402	desoxypeganine	Acetylcholinesterase inhibitor		ACHE, MAOA	Acetylcholinesterase inhibitor, Monoamine oxidase inhibitor	-37.16	-84.9	-14.65	41.53	-1.8	-46.48	-76.9	-38.85	-98.33	10.54	-90.94	-28.53	-20.95	-16.53	-66.65	-49.16	-82.16	-15.43	-53.46	-81.88	-40.5	-54.87	-60.58	-88.02	-81.26	-89.38	-93.79	-44.18	-8.51	-87.87	-57.96	-55.92	-16.39	-43.17	-21.99	-81.72	-82.15	-86.07	-38.48	-80.43	-97.11	-93.61	-49.31	-88.8
BRD-K50311478	tosyl-phenylalanyl-chloromethyl-ketone	Chymotrypsin inhibitor			Chymotrypsin inhibitor	-6.69	-9.86	-0.61	3.62	-38.57	-46.48	6.6	-11.43	-0.85	-7.15	-3.13	11.76	-10.44	-51.64	-9.05	18.84	2.88	84.38	-17.36	-3.52	-9.77	-53.56	8.68	2.08	1.13	-6.55	-5.17	-54.98	-33.67	-38.93	-52.45	-53.29	-11.64	-10.63	-3.03	-62.45	-32.19	37.43	-19.17	-46.78	-43.45	-9.37	3.79	4
BRD-K47278471	diphenhydramine	Histamine receptor antagonist		HRH1	Histamine receptor antagonist	0.03	1.44	2.11	-8.49	26.17	-46.47	60.81	-49.04	56.05	9.76	77.24	78.94	-10.04	29.49	35.83	-40.89	40.37	31.12	31.29	-52.33	4.74	49.85	2.78	72.21	-18.82	47.98	-38.33	67.11	31.3	-29.75	32.82	10.18	0.92	15.62	-6.31	15.05	-10.26	47.55	54.28	74.66	5.6	60.37	4.72	69.61
BRD-K19111024	clofibric-acid	PPAR receptor agonist		PPARA	PPAR receptor agonist	0	-6.71	-10.58	-3.38	1.09	-46.32	-67.31	-79.65	-54.91	-81.11	-62.24	-42.08	-7.38	-84.12	-68.8	-76.12	-47.45	-62.11	-80.1	-85.79	-89.31	-92.37	-39.69	-52.94	-36.84	-67.53	-53.9	-50.18	-67.6	-62.5	-72.74	-6.87	8.6	-59.88	-7.8	-8.81	-32.35	-40.49	-8.28	-61.49	-49.25	-47.77	-50.02	-82.87
BRD-K88742110	BRD-K88742110	HDAC inhibitor		HDAC8, IL1B	HDAC inhibitor	-0.18	-90.65	-0.49	0.1	3.68	-46.31	-28.64	-10.65	-95.85	1.8	-92.58	-68.8	-1.32	-24.57	-61.65	-54.75	-94.5	-35.57	-38.68	-32.98	-12.06	-77.44	-1.02	-66.14	-41.9	-85.77	-79.92	-13.54	-1.52	-52.62	-58.55	-1.56	-0.14	-63.59	-5.46	-69.42	3.03	-48.66	-49.41	-71.56	-78.08	-97.33	-37.56	-99.4
BRD-A29426959	carbinoxamine	Histamine receptor antagonist		HRH1	Histamine receptor antagonist, L-type calcium channel blocker	0.25	-25.52	-0.11	-1.87	-5.24	-45.77	-53.8	-69.3	-76.36	-79.2	-83.63	1.73	-2.15	-48.51	-82.14	-60.68	-87.63	-48.56	-66.18	-91.03	-30.57	-57.6	8.27	-72.37	-50.41	-93.4	-82.81	-58.64	-6.06	-84.35	-86.47	-34.21	-2.54	-41.86	-35.04	-42.63	-51.84	-63.39	-58.76	-80.37	-63.42	-61.34	-42.61	-89.59
BRD-K45252063	clofibrate	PPAR receptor agonist		PPARA, LPL	PPAR receptor agonist	0	-14.39	0	0.24	2.08	-45.41	-42.64	-74.41	-90.32	-54.84	-40.45	-49.45	-67.21	-40.87	-46.63	-69.07	-73.57	-73.83	-78.21	-84.2	-88.33	-39.16	-27.38	-94.12	-65.74	-80.63	-72.88	-41.92	-16.26	-67.62	-23.76	-8.56	-1.34	-52.87	-51.63	-40.14	-22.24	-38.97	-34.12	-85.86	-54.17	-68.97	-49.09	-88.74
BRD-A09062839	amylocaine	Local anesthetic			Local anesthetic	-5.63	61.18	-24.13	11.87	-47.99	-45.37	-52	4.51	-32.68	-2.01	-76.14	-16.37	14.97	24.31	-37.14	-44.61	-35.54	-34.32	-73.15	-39.01	-20.52	-62.99	3.14	-84.55	-46.81	-30.7	-47.2	27.49	-3.48	-54.16	-66.36	-65.64	8.36	3.91	-9.64	-64.04	-2.01	-21.47	-24.62	29.19	3.91	-10.85	-16.62	-25.39
BRD-A84389633	tropanyl-3,5-dimethylbenzoate	Serotonin receptor antagonist			Serotonin receptor antagonist	0	-8.4	0	1.73	-22.75	-45.32	-32.27	32.91	-51.51	-69.42	-41.9	-3.24	-36.52	-24.87	-13.18	-30.55	47.17	28.64	-38.11	-26.06	-11.18	-13.58	8.34	-72.88	-29.52	14.13	-43.7	-48.48	-15.61	-81.65	-34.13	-24.77	-59.69	-37.8	-78.92	-56.83	-57.67	-85.86	-61.48	-33.57	-69.07	-25.81	16.29	-42.04
BRD-A28318179	aminomethyltransferase	Nitric oxide synthase inhibitor		NOS2	Nitric oxide synthase inhibitor	-2.33	-46.71	-3.1	-2.57	-10.34	-45.3	-65.48	-44.86	-47.99	-67.04	-25.21	-68.66	-20.85	-40.8	-55.15	-41.82	-70.4	-12.66	-77.02	-54.58	-57.5	-84.28	-8.19	-57.04	-63.31	-67.9	-41.97	-75.19	-15.74	-71.18	-57.69	-30.72	-2.71	-64.39	-13.04	-32.26	-15.11	-13.66	-53.71	-56.44	-63.72	-47.9	-38.13	-49.06
BRD-K91696562	orantinib	FGFR inhibitor	FGFR inhibitor	PDGFRB, AURKA, AURKB, KDR, EGFR, FGFR1, FGFR2, PDGFRA, TBK1	FGFR inhibitor, VEGFR inhibitor, PDGFR receptor inhibitor	-9.3	-79.69	-70.19	-3.73	4.22	-45.17	-85.51	-7.1	-95.67	-11.16	-93.33	-95.22	-6.01	-95.14	-86.79	-62.74	-78.99	-69.57	-86.39	-95.55	-98.59	-90.85	-25.87	-75.72	-71.9	-82.32	-84.69	-85.79	-46.8	-98.02	-30.27	-7.34	-37.18	-91.37	-7.23	-89.12	-49.28	-93.14	-71.94	-95.14	-69.03	-89.85	-93.13	-95.7
BRD-K32744045	disulfiram	Aldehyde dehydrogenase inhibitor		ALDH2, ALDH1A2, ALDH5A1, ALDH7A1, CYP2E1, DBH, DNMT1, TRPA1	Aldehyde dehydrogenase inhibitor, TRPV agonist, DNA methyltransferase inhibitor	-3.17	18.13	-5.83	1.13	-0.11	-44.92	82.2	-59.25	65.95	-7.24	22.12	83.4	-1.94	3.56	72.13	58.64	-11.9	-5.8	71.73	-51.24	28.34	-5.59	-0.14	89.48	-25.79	66.2	-54.14	6.38	-44.44	62.83	14.19	-2.11	-2.43	-8.52	-27.49	-8.44	38.35	50.79	46.81	-23.43	-72.17	64.78	-10.38	78.2
BRD-A98702003	carbenoxolone	11-beta-HSD1 inhibitor		HSD11B1, GJA1, GJA10, GJA3, GJA4, GJA5, GJA8, GJA9, GJB1, GJB2, GJB3, GJB4, GJB5, GJB6, GJB7, GJC1, GJC2, GJC3, GJD2, GJD3, GJD4, GJE1, PANX1, PANX2, PANX3	11-beta-HSD1 inhibitor	11.45	7.72	-9.64	-2.36	-3.59	-44.73	-33.84	-33.09	-64.44	-20.08	-74.8	-39.55	36.72	-38.63	-16.24	-69.71	-53.43	-22.37	-30.65	-23	-53.25	-69.44	-1.52	-53.51	-86.15	-82.14	-62.83	-51.38	-19.29	-37.05	-26	27.25	54.63	-56.8	-54.94	-3.42	-13.85	-62.14	-19.4	-82.73	-43.4	-51.88	-16.25	-70.42
BRD-K20287671	SU-4312	PDGFR receptor inhibitor	VEGFR inhibitor	KDR, PDGFRB	PDGFR receptor inhibitor, Tyrosine kinase inhibitor, VEGFR inhibitor	11.47	16.62	1.3	-46.52	0.78	-44.72	33.87	-52.31	5.7	0	25.13	17.64	6.93	-38.76	-17.28	-25.74	5.97	-7.45	-55.9	-61.39	-71.55	-18.27	2.85	-15.85	14.24	-7.48	-24.64	32.93	-12.5	-36.66	-22.6	-8.21	-0.81	19.7	7.27	6.43	-22.68	12.76	-78.21	-13.65	-34.92	18.34	12.26	-63.88
BRD-M47937986	cefatrizine	Bacterial cell wall synthesis inhibitor			Bacterial cell wall synthesis inhibitor	-3.01	-86.05	1.84	-2.36	-14.67	-44.6	-77.81	-44.81	-65.24	-62.68	-2.71	-3.39	-9.7	-10.2	-47.18	-88.22	-48.53	-48.72	-91.22	-66.7	-80.63	-73.87	-10.4	-91.21	-49.03	-44.58	-56.09	-75.32	-87.31	-64.72	-48.59	-23.05	-74.54	-28.86	-5.63	-29.65	-17.3	-41.29	-39.52	-71.25	-33.21	-76.35	-13.24	-75.32
BRD-K87932577	CDK1-5-inhibitor	CDK inhibitor	CDK inhibitor, Glycogen synthase kinase inhibitor	CDK1, CDK5, GSK3B	CDK inhibitor, Glycogen synthase kinase inhibitor	-1.32	-0.87	-3.49	-6.7	0.88	-44.56	8.42	-6.37	-81.91	-80.76	-29.05	-65.57	-1.44	-18.16	-93.72	-4.48	-21.25	-27.95	-12.3	-29.41	-43.8	-3.45	-70.96	-13	-50.23	-29.43	-41.7	-11.03	-4.19	-37.2	-26.37	-15.76	-39.59	12.94	-46.45	-15.36	-35.69	-9.78	-47.6	-81.87	-17.8	-32.62	-14.83	-26.68
BRD-K46068882	eugenitol	Bacterial quorum sensing inhibitor		AR, MAOA	Bacterial quorum sensing inhibitor, Chromone, Monoamine oxidase inhibitor, Androgen receptor antagonist	-12.65	-81.29	-15.04	0	-3.07	-44.37	-20.93	-16.74	-98.8	-46.99	-97.49	-81.32	-2.33	-71.65	-77.83	-89.58	-81.78	-59.4	-79.24	-97.64	-3.53	-47.54	-47.71	-96.96	-78.73	-84.26	-96.35	-69.57	-71.19	-69.16	-78.01	-43.37	-58.27	-91.82	3.21	-58.06	-90.61	-74.2	-83.86	-46.52	-82.21	-90.2	-52.53	-81.9
BRD-K27351809	nomegestrol	Progesterone receptor agonist	Progesterone receptor agonist	PGR	Progesterone receptor agonist	-20.95	-78.7	-63.86	11.03	-18.04	-44.02	-59.49	-21.88	-85.44	-1.34	-68.36	-30.54	1.69	-19.13	-66.21	-67.3	-20.83	-15.28	-80.8	-69.47	-4.47	-21.99	-37.84	-32.31	-80.35	-51.18	-65.94	-40.88	-1.97	-60.75	-42.66	0	-31.86	-14.47	-51.9	-51.69	-47.03	-50.95	-47.64	-28.48	-53.55	-81.54	-17.41	-37.74
BRD-K50938287	sumatriptan	Serotonin receptor agonist		HTR1D, HTR1B, HTR1A, HTR1F, HTR1E, HTR5A, HTR6, HTR7	Serotonin receptor agonist	1.62	-45.96	25.2	-4.95	-23.59	-43.17	-36.67	-6.34	-83.93	-80.39	-82.88	-78.33	-0.3	-30.86	-47.43	-75.34	-75.64	-68.54	-74.88	-87.49	-17.97	-58.34	-10.75	-73.25	-84.44	-94.86	-85.66	-66.03	13.4	-69.54	-61.96	-86.27	-58.75	-68.56	-67.15	-62.64	-34.56	-80.93	-55.81	-86.91	-63.61	-59.72	-20.37	-98.15
BRD-K26521938	dinoprostone	Prostanoid receptor agonist		PTGER2, PTGER1, PTGER3, PTGER4, CATSPER1, CATSPER2, CATSPER3, CATSPER4, PTGDR, PTGDR2, PTGFR, TBXA2R	Prostanoid receptor agonist	5.25	-24.34	-1.62	1.62	-13.82	-43.12	-20.77	1.41	-20.71	-32.22	-14.27	-12.05	2.11	25.99	-23.98	-18.35	5.31	-13.8	-24.72	-13.77	-31.61	-12.32	-22.3	9.64	-27.54	5.25	-49.63	-33.45	-43.99	-13.65	-1.23	-14.53	-21.98	24.72	14.06	-39.23	11.31	-34	-16.69	-9.46	-34.39	10.96	13.92	-7.31
BRD-K94353609	fluocinolone	Glucocorticoid receptor agonist	Glucocorticoid receptor agonist	NR3C1, SERPINA6	Glucocorticoid receptor agonist, Corticosteroid agonist	0	-48.36	-6.94	-11.01	-68.19	-43.02	-38.25	-69.29	-54.78	-68.48	-86.75	-20.36	-46.55	-73.75	-82.13	-94.49	-78.35	62.82	-56.03	-52.21	-20.91	-81.01	-12.76	-74.3	-74.43	-84.32	-78.46	-45.58	-40.82	-88.63	-27.6	11	0	-24.25	-78.33	-28.58	-40.37	-65.03	-11.66	23.11	-39.37	-86.09	-67.65	-65.88
BRD-K98521173	desoxycortone	Mineralocorticoid receptor agonist		NR3C1, NR3C2	Mineralocorticoid receptor agonist	-0.92	-26.65	0	-5.95	-19.56	-42.99	-41.88	-80.19	-94.54	-56.13	-41.51	-38.8	-40.01	24.53	-75.6	-43.76	-88.27	-53.3	-65.87	-39.05	-56.7	-47.68	-1.73	-90.5	-41.08	-98.33	-82.38	-58.04	-33.63	-82.93	-81.69	-61.22	-26.98	-59.25	-11.75	-78.58	-25.89	-86.48	-30.24	-79.19	-84.99	-51.78	-26.11	-73.16
BRD-K14643723	4-(2-Amino-ethyl)-benzenesulfonamide	carbonic anhydrase inhibitor		CA2, CA1, CA9, CA12, CA14, CA4	carbonic anhydrase inhibitor	0	-79.11	-28.18	4.23	0	-42.99	-50.12	-33.99	-46.96	-24.56	-88.7	-85.78	-33.11	-35.7	-52.65	-86.55	-62.77	-58.04	-90.15	-76.64	-78.81	-90.98	32.4	-42.83	-71.65	-92.56	-95.14	-37.81	-68.5	-73.84	-62.34	-33.13	-59.99	-21.54	-17.92	-37.62	-71.27	-70.07	-5.37	-47.19	-65.41	-70.63	-38.86	-81.72
BRD-A63998256	helveticoside	ATPase inhibitor	ATPase inhibitor	ATP1A1	ATPase inhibitor	0.66	47.11	32.86	-85.17	90.27	-42.99	14.73	-1.27	55.49	-60.44	12.26	72.99	-59.37	1.3	-16.41	-42.94	-7.19	-91.33	8.05	2.4	-15.16	2.91	-72.65	18.8	-66.47	46.41	-26.97	-37.63	-65.33	20.07	-5.77	17.59	-54.13	44.31	-24.18	72.48	2.47	47.9	-14.24	-56.36	74.45	3.19	-38.14	-36.66
BRD-K55748775	SCH-28080	ATPase inhibitor		ATP4A	ATPase inhibitor	0	-33.56	6.57	-2.75	-4.59	-42.98	-34.29	-30.17	8.11	-15.79	-37.47	-47.34	-42.89	47.48	81.63	-9.24	17.91	20.92	-55.03	-39.04	81.44	-46.26	-20.58	36.54	-14.72	-10.11	-31.09	-36.42	-8.37	-35.25	-38.05	-15.22	-47.86	53.17	-14.22	-56.79	7.5	10.39	-37.95	-17.06	2.92	-59.31	-53.59	-37.86
BRD-A62890442	3-methyl-GABA	GABA aminotransferase activator			GABA aminotransferase activator	0	-60.84	55.43	0	-45.61	-42.47	-38.95	-34.84	-78.77	-63.27	-44.76	-44.09	-43.19	-36.47	-47.86	-86.61	-53.02	32.89	-81.99	-89.42	-50.38	-72.82	37.85	-70.98	-68	-68.51	-89.47	-41.03	-21.43	-63.59	-82.4	-29.81	-30.02	-35.35	-86.62	-49.44	-85.58	-37.05	-44.86	11.17	-72.51	-86.77	-45.53	-68.01
BRD-K88560311	rucaparib	PARP inhibitor	PARP inhibitor	PARP1, PARP2	PARP inhibitor	-0.99	-63.78	-23.61	13.81	-1.76	-42.38	-82.25	-64.67	-94.31	-37.74	-61.58	-86.63	30.04	23.2	-93.62	-62.06	-23.41	-81.37	-4.49	-61.4	-14.11	-25.3	-83.88	-17.81	-36.13	-84.1	-77.8	-46.86	-18.6	-46.01	-58.46	-58.72	-19.38	-82.36	-90.44	-89.08	-72.41	-90.04	-55.11	-90.76	-93.6	-97.35	-22.33	-82.48
BRD-A19500257	geldanamycin	HSP inhibitor	HSP inhibitor	HSP90AA1, HSP90AB1	HSP inhibitor	50.37	68.71	1.89	-94.26	0	-42.36	74.36	8.23	74.69	-34	26.01	14.01	-80.76	-62.44	1.34	-59.71	66.34	74.82	7.38	-18.48	76.34	-27.83	0.92	-10.23	-4.68	87.41	-12.84	-7.15	-30.43	68.28	-55.6	0.94	0.56	18.21	0	25.62	65.03	64.95	33.74	77.45	29.44	68.01	-1.48	56.18
BRD-K04833372	GSK-1904529A	IGF-1 inhibitor		IGF1R, INSR	IGF-1 inhibitor, IGF-1R inhibitor, Insulin receptor ligand	0	-22.04	3.59	-72.97	0	-42.35	-71.74	-38.35	-61.71	-43.27	-78.87	-77.5	-75.92	-86.81	-68	-22.14	-45.69	-26.37	-74.67	-69.25	-89.82	-64.86	-26.28	-79.16	-13.8	-50.91	-55.28	-47.54	-20.75	-89.86	-92.77	-1.76	-62.78	-57.52	-39.76	-79.94	-36.13	-2.82	-45.8	-51.41	-14.72	-49.61	-2.82	-40.63
BRD-A56020723	CA-074-Me	Cathepsin inhibitor		CTSB	Cathepsin inhibitor	-88.33	-25.33	-63.68	36.42	-27.39	-42.33	30.96	5.94	-10.78	-28.19	0	12.87	5.73	-9.25	33.33	33.42	-9.1	39.01	6.95	1.2	51.49	-21.87	23.03	52.55	-4.24	8.23	-86.69	-29.08	-71.82	3.71	2.02	-6.98	-29.11	-68.56	13.8	-2.22	10.01	5.74	-5.73	-38.08	-14.12	9.85	-27.44	-35.86
BRD-A23637604	oxymetholone	Androgen receptor agonist	Androgen receptor modulator	AR	Androgen receptor agonist	-5.5	-62.91	-7.15	-51.83	-28.63	-42.14	-64.7	-14.04	-80.71	-60.12	-12.37	-19.77	-75.74	-77.13	-93.57	-68.35	-87.97	-50.7	-59.79	-89.46	-62.3	-70.85	-39.29	-41.42	-41.96	-88.41	-90.71	-73.84	-86.72	-50.59	-59.07	-4.44	-86.35	-88.93	-90.76	-76.72	-98.41	-47.91	-94.37	-87.64	-94.79	-95.82	-89.58	-93.49
BRD-K52512893	SC-19220	Prostanoid receptor antagonist		PTGER1	Prostanoid receptor antagonist	-3.82	-5.6	-0.92	-20.17	-33.16	-42.02	-8.81	-17.89	-57.22	-72.82	-96.67	-18.27	10.26	-62.89	-81.73	-74.21	-34.44	-10.92	-92.71	-27.32	-56.63	-92.2	-54.85	-58.59	-18.68	-43.83	-89.43	-12.57	-14.1	-63.76	-89.9	-64.05	-6.14	-81.45	-67.6	-49.05	-12.26	-40.42	-61.71	-24.87	-37.2	-80.12	-15.91	-63.42
BRD-K68558722	deracoxib	Cyclooxygenase inhibitor		PTGS2	Cyclooxygenase inhibitor	18.44	-9.42	1.94	-2.01	-2.08	-41.98	-44.17	-20.35	16.89	-30.21	-39.79	34.76	-0.39	-20.09	-16.82	-36.04	-38.9	36.44	-13.92	-34.51	-38.06	2.26	-1.41	-52.86	-67.19	-54.77	3.14	-32.28	-18.9	-75.48	62.1	0.32	-3.1	35.44	-71.83	-19.82	30.44	-10.09	-8.81	-56.51	13.41	-5.01	-28.09	-44.33
BRD-K69556541	ryanodine	Calcium channel blocker		RYR1, RYR2, RYR3	Calcium channel blocker	0	-1.44	0	38.44	-2.01	-41.74	-25.33	-16.83	-30.88	-27.62	6.53	-1.94	-32.36	8.51	-1.81	-40.15	18.62	-19.29	-8.29	-38.11	44.11	-2.22	-23.62	1.9	-38.43	-49.28	-44.81	15.29	16.12	-14.92	8.86	-32.02	-23.64	12.89	-8.34	-47.6	-46.41	-6.34	-9.31	34.66	-77.67	-9.06	-24.01	-8.86
BRD-A43150328	penicillic-acid	other antibiotic			other antibiotic	-77.6	-22.93	-8.25	28.15	18.38	-41.45	-9.31	-31.49	-2.01	-10.6	-12.58	5.29	14.55	6.72	-4.77	65.87	-6.7	37.45	1.97	-2.6	1.27	-8.45	1.94	17.96	-26.41	4.57	-75.31	-37.6	-69.46	6.59	-12.84	-60.69	-42.64	0.7	-1.06	-1.3	0	-6.47	-1.09	-10.89	-8.04	2.86	-35.42	-20.95
BRD-K74430258	1,2-dichlorobenzene	Hepatotoxicant			Hepatotoxicant, Organic compound	-34.46	-64.11	-39.28	0	-3.21	-41.14	-48.1	-63.34	-56.06	-55.28	-64.63	-55.81	-43.67	8.03	-25.59	-31.84	-47.04	-38.2	-74.09	-57.12	-45.89	-51.75	-10.61	-42.91	-84.03	-75.21	-65.22	-58.12	-4.51	-87.02	-78.82	-18.7	-44.08	-42.46	-44.02	-68.62	-2.57	-40.95	-66.46	-52.23	-48.44	-73.24	-65.76	-83.27
BRD-A09472452	flecainide	Sodium channel blocker		SCN5A, KCNA5, KCNA7, SCN4A	Sodium channel blocker	-3.14	-64.38	-10.64	9.99	-10.05	-41.05	-44.31	-26.21	-84.57	-4.02	-82.24	-54.68	-1.34	-13.78	-27.97	-38.18	-31.02	-6.51	-31	-75.4	-26.07	-59.89	-7.04	-73.03	-70.98	-57.87	-81.66	-45.04	-17.91	-83.41	-22.07	-22.63	-6.13	-33.84	-35.58	-35.95	-3.33	-59	-20.43	-32.54	-70.34	-52.11	-9.91	-73.28
BRD-K40578143	GR-79236	Adenosine receptor agonist	Adenosine receptor agonist	ADORA1, ADORA2A	Adenosine receptor agonist	3.03	-24.85	11.09	-16.92	-1.06	-41.01	-23.75	-49.03	-2.01	-52.78	-9.12	-25.83	0	23.07	-34.63	-34.7	1.62	4.82	-29.49	-70.48	9.91	4.32	15.37	19.33	-27.71	-18.8	-65.02	-73.66	15.44	-22.57	1.6	-2.34	-13.6	10.9	-1.37	-48.47	21.8	-48.29	28.12	12.97	-25.63	-41.37	1.26	-26.29
BRD-K50938786	ropivacaine	Sodium channel blocker		SCN10A, SCN9A	Sodium channel blocker	0	-6.05	0.4	-0.53	-2.89	-40.94	4.83	-10.91	-10.21	0.46	-3.74	-18.13	-12.71	-0.53	-10.12	-3.38	7.49	-12.67	-1.02	-4.77	-15.5	-0.28	3.98	-12.43	-24.56	4.24	-0.35	-4.24	7.38	-5.48	16.85	0.25	0	-16.07	0	-0.6	-2.33	-7.54	-11.5	6.48	4.6	3.88	2.5	9.02
BRD-A87719232	naproxen	Cyclooxygenase inhibitor		PTGS2, PTGS1	Cyclooxygenase inhibitor	1.41	14.52	36.38	-24.95	-1.16	-40.5	36.53	4.98	-11.94	-2.31	-17.23	44.98	-19.95	78.58	26.73	-7.17	44.53	69.24	30.74	30.86	10.37	5.36	38.97	19.22	-30.68	5.73	33.64	2.84	-1.34	49.29	4.16	-25.07	-25.36	32.35	34.48	24.25	54.94	46	-16.91	34.74	44.77	46.34	79.6	39.85
BRD-K70557564	zosuquidar	P-glycoprotein inhibitor		ABCB1, ABCB4	P-glycoprotein inhibitor	0	2.58	1.2	-2.15	3.24	-40.48	15.3	-9.76	-16.23	0	-39.55	19.72	-10.1	-24.4	13.86	-18.12	-2.92	-13.46	-1.41	-22.91	8.18	-77.38	-13.55	-19.15	-38.34	4.9	-46.12	-22.94	31.07	-31.89	-18.65	-10.12	4.52	-62.36	2.82	3.1	13.41	-35.09	-24.61	-9.53	-1.16	-11.32	-28.68	-28.94
BRD-A90799790	isradipine	Calcium channel blocker		CACNA1C, CACNA1D, CACNA2D1, CACNA1F, CACNA1H, CACNA1S, CACNA2D2, CACNB2	Calcium channel blocker	4	-9.27	-6.02	0.03	-50.09	-40.3	-52.69	-2.71	-3.52	-2.7	-0.92	-2.2	2.75	35.61	-21.82	-21.16	23.92	-2.78	-40.02	-36.87	-1.82	-7.24	-0.04	11.35	-69.74	8.91	-52.34	-17.54	-27.02	-3.74	-5.04	-26.43	-61.62	2	-0.04	12.74	25.55	30.2	4.94	-13.94	-5.03	-27.18	11.59	3.4
BRD-K22096725	ALW-II-49-7	Ephrin inhibitor		DDR1, EPHA2, EPHA4, EPHA7, EPHB2, EPHB4, EPHB6	Ephrin inhibitor	0	-42.77	-46.87	-7.39	-35.38	-40.04	-55.17	-86.92	-71.4	-71.93	-89.01	-82.74	-40.34	-79.25	-76.38	-62.47	-83.3	-80.55	-84.89	-79.52	-45.27	-74.19	-74.19	-96.51	-82.87	-94.75	-55.92	-25.41	-31.9	-95.48	-79.55	-36.2	-76.1	-93.92	-54.04	-94.4	-57.87	-67.69	-51.96	-88.66	-77.93	-60.03	-54.95	-59.46
BRD-K35498378	alrestatin	Aldose reductase inhibitor		AKR1B1	Aldose reductase inhibitor	-3.7	-44.56	-35.69	0.75	0	-39.99	-47.97	-46.15	-34.93	-11.61	-81.4	-26.94	-27.27	7.7	-44.53	-46.68	-30.35	-71.57	-91.72	-77.87	-29.34	-22.35	-1.07	-59.72	-71.52	-76.82	-65.73	-40.43	-27.21	-88.44	-30.02	-35.45	-1.06	-39.92	-17.11	-71.19	-35.61	-63.32	-45.68	-20.82	-60.43	-66.36	-43.27	-63.03
BRD-K36395411	SB-206553	Serotonin receptor antagonist		HTR2B, HTR2C, HTR1A, HTR2A	Serotonin receptor antagonist	18.23	11.49	40.32	-3.64	-40.53	-39.91	4.58	-11.39	-3.71	-1.94	-13.95	-25.4	0	14.76	-18.41	-29.67	23.45	37.54	-52.16	4.22	-43.44	4.83	10.89	26.87	-25.46	3.98	-36.68	-16.09	7.4	3.63	-27.22	-55.61	-16.56	32.79	-13.58	46.22	37.16	-9.7	-7.4	23.38	2.07	-8.55	39.5	7.73
BRD-K15402119	huperzine-a	Acetylcholinesterase inhibitor		ACHE	Acetylcholinesterase inhibitor	0	-8.24	0	0	-79.58	-39.85	-78.06	-91.62	-81.69	-86.05	-80.81	-97.92	0	-81.82	-77.83	-92.75	-50.61	-36.99	-92.24	-84.03	-93.16	-90.09	43.77	-73.31	-24.25	-89.81	-72.51	-58.63	-77.63	-90.48	-80.69	-70.81	0	41.56	-64.14	-70.49	-91.84	-48.03	-55.6	-71.85	6.06	-82.16	35.49	-77
BRD-A04668240	CGP-52432	GABA receptor antagonist	GABA receptor antagonist	GABBR1, GABBR2	GABA receptor antagonist	0	-71.68	0	1.69	-11.53	-39.08	-75.94	-45.94	-81.37	-4.19	-34.05	-35.48	-61.25	-3.97	-36.83	-27.62	-52.86	-47.23	-32.61	-73.17	-32.28	-35.58	-34.81	-44.62	-67.81	-83.34	-69.69	-55	-15.98	-63.66	-46.49	-23.3	-24.3	-43.86	-10.45	-61.71	-20.01	-46.16	-41.29	-34.98	-65.28	-52.58	-54	-56.18
BRD-K33583600	isoliquiritigenin	Guanylate cyclase activator		AKR1B1, HRH2, SIRT1	Guanylate cyclase activator	-88.93	-6.91	-22.34	96.23	-6.47	-39.06	-14.81	-17.54	-40.96	18.55	0	3.21	-0.6	-5.07	-25.8	23.02	-21.99	57.27	-1.02	19.78	-16.17	-19.27	8.92	3.31	20.1	-18.76	-11.85	45.82	-30.67	3.24	-0.53	-50.01	-16.79	-15.7	-33.84	0.63	30.19	-41.13	-14.56	-19.84	-23.07	-3.52	51.76	-18.11
BRD-K61097567	SB-218795	Tachykinin antagonist		TACR3	Tachykinin antagonist	0	-58.02	0	-15.18	-38.35	-39.05	-55.37	-51.18	-66.06	-17.53	-50.9	0	-2.33	-17.46	-12.42	-61.79	-24.29	-26.05	-40.28	-52.05	-12.58	-15.42	-13.8	-42.26	-26.47	-63.68	-25.5	-41.16	-2.33	-77.19	-59.37	-13.79	-30.17	-18.13	-21.1	-37.51	-21.93	-42.02	-35.94	-13.66	-49.83	-45.43	49.26	-55.33
BRD-A35623999	CGP-37157	L-type calcium channel blocker		SLC8A1	L-type calcium channel blocker, Mitochondrial Na+/Ca2+ exchanger antagonist, Sodium/calcium exchange inhibitor	0	-50.27	-32.45	0	-15.54	-38.96	-24.57	-27.61	-72.98	-11.23	-44.77	-32.21	0	3.27	-51.75	-87.15	10.65	-23.53	-56.18	-33.39	31.89	-50.78	-17.97	-18.14	-51.41	-42.75	-80.2	-3.88	21.58	-28.72	-25.39	4.3	-66.97	2.36	-29.97	-40.21	26.52	-39.72	-46.43	-23.5	-38.86	-57.91	-73.72	-73.31
BRD-K16551401	PNU-22394	Serotonin receptor agonist		MAOA, MAOB	Serotonin receptor agonist	4.33	-28.38	0.99	-1.23	-17.17	-38.89	-34.44	-9.79	-44.67	-1.3	-35.13	5.78	-26.31	-20.36	-25.27	-25.32	-39.06	-1.9	-17.32	-39.08	-33.3	-27.83	13.32	-33.37	-18.33	-27.43	-32.55	-25.74	-37.52	-23.92	-18.59	-32.56	-23.84	-1.29	19.58	-31.54	-16.28	-43.74	-34.05	-14.52	-28.54	-51.54	-11.87	-60.69
BRD-K56596464	QX-314	Sodium channel blocker		MAPK14, TGFBR1	Sodium channel blocker	-15.96	-78.49	-15.09	-3.23	35.29	-38.56	-31.85	-74.02	-57.06	-3.81	-22.21	11.79	-30.61	-28.02	-70.22	-75.1	-57.78	-89.26	-46.39	-61.51	-23.31	-50.4	-29.8	-83.38	-65.18	-45.43	-79.35	-45.35	-38.46	-59.47	-33.56	-73.26	-49.89	-46.39	-52.81	-63.2	-24.66	-74.59	-68.75	9.99	-72.61	-77.19	-22.07	-48.03
BRD-A39268308	epibatidine	Acetylcholine receptor agonist		CHRFAM7A, CHRNA2, CHRNA3, CHRNA4, CHRNA7	Acetylcholine receptor agonist	-54.64	-48.1	-22.6	44.63	-7.37	-38.52	-51.56	-6.52	-47.98	-51.57	-56.55	-73.48	-14.87	-42.21	-29.64	-19.26	-50.85	-36.15	-78.05	-78.34	-61.22	-80.14	-10.54	-82.62	-41.14	-91.85	-86.07	-78.48	-24.93	-26.74	-66.21	33.54	0	5.07	-8.96	-34.97	8.32	-39.38	-81.91	-37.48	-68.81	-90.65	-64.46	-94.88
BRD-A68631409	evodiamine	ATPase inhibitor		TRPV1	ATPase inhibitor, TRPV agonist	-33.66	-72.18	-91.42	-2.04	60.19	-38.5	-84.52	-50.97	-89.17	-6.1	-94.73	-78.38	21.63	-16.32	-73.42	-92.48	-88.34	-77.56	-98.45	-97.12	-79.72	-43.32	-2.15	-88.96	-90.13	-83.69	-72.12	-81.13	-3.41	-98.72	-7.62	-73.05	10.34	-65.28	19.04	-73.03	-38.65	-86.09	-29.51	-57.65	-88.42	-79.09	-87.42	-91.79
BRD-K80527266	triacsin-c	Adrenergic receptor antagonist		ACSL1	Adrenergic receptor antagonist	-40.13	-88.48	-58.49	29.62	-7.28	-38.34	-90.04	-11.23	-87.43	-2.09	-90.03	-62.64	22.03	-69.99	-49.41	-65.11	-94.32	-52.72	-96.76	-91.25	-83.17	-81.83	25.33	-88.02	-73.64	-98.65	-92.74	-95.32	18.82	-96.6	-88.98	-90.45	-41.93	-61.42	-34.9	-69.17	-69.4	-93.7	-98.57	-65.83	-94.11	-81.11	-89.41	-97.74
BRD-K08109516	L-701324	Glutamate receptor antagonist		GRIN1, GRIN2A, GRIN2B, GRIN2C, GRIN2D	Glutamate receptor antagonist	0	-18.81	8.84	-0.92	-4.06	-38.29	-34.3	-77.11	-53.97	-39.05	-52.46	5.78	-7.96	-35.8	-68.07	-86.37	-32.39	-69.87	-40.89	-69.76	-43.35	-20.13	-19.18	-42.97	-9.28	-99.15	-55.78	-59.59	-44.7	-70.2	-45.1	-89.8	-38.1	13.14	-33.89	-70	-84.06	-88	-31.05	-82.61	-74.55	-43.56	0.85	-83.05
BRD-A58955223	sulforaphane	Antineoplastic		NFE2L2	Antineoplastic, Aryl hydrocarbon receptor antagonist	0	-32.88	-38.5	91.36	55.53	-38.28	-1.2	-1.3	-43.74	-57.1	-76.12	-33.22	0	-6.46	-23.82	-27.47	-85.91	-66.13	-27.49	-32.52	-9.11	-65.33	-2.82	-6.84	-9.08	-16.91	-48	-92.36	-41.21	-66.62	1.16	-52.9	-59.83	-68.89	-21.02	-73.79	0.85	-69.01	-87.23	-19.35	-27.46	-29.12	-89.5	-94.43
BRD-A77299732	salubrinal	Eukaryotic translation initiation factor inhibitor		EIF2S1, SLC6A9	Eukaryotic translation initiation factor inhibitor	0.39	7.76	3.46	-5.65	-32.82	-38.23	-47.27	-6.91	-2.15	-18.43	-19.71	10.52	-10.41	-12.13	-2.39	14.51	2.92	12.48	4.02	14.8	2.92	-1.16	-43.27	6.64	-14.55	3.23	-8.84	37.24	-22.03	2.79	-15.85	-28.43	-29.69	4.15	-11.2	-11.55	2.83	6.13	8.22	-34.01	-26.79	5.25	25.01	8.19
BRD-K34170797	fexaramine	FXR agonist		NR1H4	FXR agonist	0.37	6.08	1.58	-10.39	-4.18	-38.04	-35.93	-19.88	-21.71	-31.94	-50.88	-8.92	0.35	-34.06	-61.5	-69.83	-13.21	10.64	-14.26	-20.38	-8.54	-15.56	-37.93	24.72	-51.95	-20.1	-27.28	-49.2	-9.95	-19	-69.44	-26.98	-35.28	6.85	0.88	-29.64	-7.45	-30.54	-67.85	-20.19	-11.51	-30.54	13.54	-50.01
BRD-K18036262	L-168049	Glucagon receptor antagonist		GCGR	Glucagon receptor antagonist	0	42.93	-0.6	-15.4	5.99	-37.83	71.03	43.65	67.81	60.93	0	-24.88	1.99	30.19	20.58	70.76	69.49	29.82	8.42	61.29	14.08	63.94	-8.85	58.19	-34.71	78.19	-2.22	7.25	-49.82	54.2	35.01	-9.25	12.92	24.86	1.87	51.34	17.52	58.6	10.16	27.65	42.09	58.62	78.72	46.34
BRD-K16336526	capsaicin	TRPV agonist		TRPV1, CFTR, ENOX2	TRPV agonist	-1.47	16.81	-1.06	-0.18	15.88	-37.81	37.89	-26.51	45.19	41.81	-22.47	55.74	0.85	-14.78	7.69	-8.58	18	22.56	-33.99	47.42	18.06	46.69	36.31	42.85	-64.1	-64.94	-19.5	-8.48	21.29	-72.44	-49.7	-19.87	-5.3	-18.38	14.02	-41.06	18.41	-32.08	11.35	-72.25	-34.7	15.82	-33.16	-40.5
BRD-A82371568	clofarabine	Ribonucleoside reductase inhibitor	Ribonucleotide reductase inhibitor	RRM1, POLA1, RRM2, SLC22A8	Ribonucleoside reductase inhibitor	10.19	24.63	13.17	-12.12	1.47	-37.34	69.02	36.28	48.99	-1.76	35.23	16.11	20.5	-8.93	38.06	61.44	40.4	17.13	88.06	78.2	6.27	62.65	-27.59	78.62	-2	26.09	5.8	93.62	-42.02	38.18	-14.25	-4.52	9.02	1.94	-25.2	40.44	6.91	22.47	36.76	-46.64	49.63	1.73	54.49	7.14
BRD-K55930204	phenytoin	Hydantoin antiepileptic		ABCB1, CYP2B6, CYP2C19, CYP3A4, SCN1A, SCN2A, SCN5A	Hydantoin antiepileptic	-20.31	-55.28	-36.86	0	48.77	-37.32	-60.83	-79.21	-76.07	0	-80.98	-43.87	-18.92	-41.93	-56.16	-83.21	-64.31	-73.9	-71.56	-84.75	-27.69	-25.38	-48.55	-61.7	-86.98	-80.39	-75.97	-44.8	-56.98	-48.88	-12.24	-45.08	-57.58	-71.23	-52.76	-93.65	-84.43	-67.47	-59.17	-36.4	-90.2	-71.24	-77.44	-93.32
BRD-K11158509	tyrphostin-B44	EGFR inhibitor			EGFR inhibitor	0	-71.58	-21.23	10.21	-5.29	-37.25	-56.43	-36.49	-55.97	-2.54	-69.13	21	-8.98	-27.36	-58.64	-43.03	-55.88	-51.42	-72.22	-62.65	-71.64	-65.43	7.12	-32.13	-43.78	-79.29	-51.74	-21.64	-29.84	-73.62	-33.31	-27.82	8.25	1.81	13.37	-32.66	-49.28	-49.73	-36.97	-13.79	-19.81	-53.23	36.51	-47.06
BRD-K18250272	propoxycaine	Local anesthetic			Local anesthetic	-0.12	-56.2	-3.42	12.19	-21.3	-37.21	-47.35	-1.27	-44.41	-32.87	-27.9	5.92	-46.85	0.85	-3.38	-73.35	-78.09	-40.77	-21.37	-50.04	-26.52	-3.42	-27.87	-25.91	-40.35	-69.18	-60.83	-38.54	0	-29.75	-22.3	-63.03	-32.95	-21.55	-19.99	-7.08	-20.95	-19.96	-18.28	-15.1	-14.18	-37.84	-73.89	-20
BRD-K67847053	guanabenz	Adrenergic receptor agonist		ADRA2A, ADRA2B, ADRA2C	Adrenergic receptor agonist	0.18	17.18	-1.97	-9.85	-0.67	-37.2	8.77	42.61	-16.12	-10.3	-62.65	32.58	-53.75	-43.59	-31.19	-54.42	42.68	34.31	-80.53	37.55	-55.34	-22.77	50.78	15.26	40.94	41.39	45.26	-34.3	6.63	-56.26	-44.26	35.13	25.79	25.49	4.07	-28.7	-7.96	57.69	8.06	6.07	31.97	11.05	18.38	14.54
BRD-A34205397	suloctidil	Adrenergic receptor antagonist			Adrenergic receptor antagonist	0	69.82	0	-5.6	-49.23	-37.14	83.13	63.61	51.45	3.14	7.68	46.94	-22.41	-67.32	64.7	77.92	36.27	47.48	74.78	75.23	54.96	-34.09	0	54.53	16.51	85.23	37.66	62.19	-29.65	81.26	28.64	79.32	-11.31	7.9	-14.8	57.2	26.75	72.58	65.19	14.42	72.88	60.62	34.72	71.45
BRD-A43930669	L-368899	Oxytocin receptor antagonist		OXTR, AVPR1A, AVPR2, OXT	Oxytocin receptor antagonist	-3.21	-76.77	-6.43	-10.1	-11.64	-36.82	-67.7	-42.32	-65.28	-10.31	-81.17	-42.65	-8.67	-37.47	-64.03	-20.17	-40.91	-29.1	-33.32	-63.12	-9.92	-41.39	-13.28	-30.09	-33.26	-49.53	-59.54	-61.05	-11.06	-56.58	-83.15	-17.04	-34.1	-16.29	-41.03	-42.38	-65.17	-79.42	-2.14	-15.1	-10.32	-64.5	-11.46	-51.8
BRD-A01295252	trans-7-hydroxy-pipat	Dopamine receptor ligand			Dopamine receptor ligand	0	-6.84	0	0	-53.08	-36.63	-1.66	-9.03	-14.26	-11.62	-2.22	25.16	-78.84	22.17	33.39	-44.31	2.11	29.55	-75.54	-41.64	-2.43	-11.99	46.92	-24.33	-36.92	-43.72	-39.72	15.97	-1.82	-32.75	-28.37	-1.66	-13.29	45.82	-17.2	-1.48	-82.38	-16.53	-4.97	-4.21	-14.21	-42.09	25.41	30.03
BRD-K74763371	bosentan	Endothelin receptor antagonist		EDNRB, EDNRA, ABCB1, CYP2C19, CYP3A4	Endothelin receptor antagonist	-6.27	-83.6	0	-45.87	-8	-36.47	-20.55	-60.51	-47.11	-14.36	-58.87	-11.09	-17.95	-1.76	-62.63	-52.69	-31.71	-21.63	-39.93	-22.82	-8.88	6.2	-3.63	-49.51	-29.38	-79.99	-76.14	-29.5	-19.02	-56.66	-75.79	-49.81	-23.17	-16.48	-31.61	-51.05	-47.04	-54.28	0	-40.8	-27.71	-33.98	-14.52	-60.1
BRD-A75552914	isoxicam	Cyclooxygenase inhibitor		PTGS1, PTGS2	Cyclooxygenase inhibitor	0	-48.31	-24.09	-41.06	-5.46	-36.33	-66.74	-33.75	-84.35	-38.85	-89.9	-25.84	-59.09	-25.44	-43.64	-71.61	-65	-56.34	-49.25	-58.3	-62.26	-37.92	18.66	-74.98	-66.17	-76.16	-83.59	-56.24	-23.31	-88.68	-22.79	-5.61	-13.62	-43.52	-14.89	-53.02	-59.95	-43.39	-70.92	-60.04	-58.22	-68.5	-56.69	-56.98
BRD-A26002865	verrucarin-a	Protein synthesis inhibitor	Protein synthesis inhibitor		Protein synthesis inhibitor	39.71	10.43	0	-46.5	5.29	-35.94	49.1	21.74	24.72	-90.93	0	12.59	54.37	-5.18	5.88	54.49	4.05	-89.24	81.59	66.21	-47.6	28.01	-96.36	65.82	-51.69	53.31	4.02	87.71	0	10.35	0	90.13	0	-3.84	6.34	4.23	70.02	43.73	17.77	66.33	-19.93	47.07	0	-5.07
BRD-A59808129	guggulsterone	Cholesterol inhibitor	FXR antagonist	NR1H4, PGR, AR, ESR1, IKBKB, NR1I2, NR3C1, NR3C2	Cholesterol inhibitor, Estrogen receptor agonist, FXR antagonist, IKK inhibitor, Pregnane X receptor agonist, Progesterone receptor agonist	-1.76	-60.34	-18.46	2.26	-2.7	-35.91	-74.16	-44.67	-95.35	-40.61	-79.59	-4.72	-29.72	-33.78	-5.99	-14.84	-86.45	-21.11	-72.32	-83.76	-45.39	-86.01	25	-50.11	-93.28	-92.44	-87.56	-52.1	-29.94	-81.18	-5.09	-11.75	-14.88	-83.64	0	-82.66	-4.82	-94.82	-35.19	-58.07	-87.86	-68.52	-86.29	-92.36
BRD-K90733503	cefalexin	Bacterial cell wall synthesis inhibitor	Bacterial cell wall synthesis inhibitor		Bacterial cell wall synthesis inhibitor	-0.6	48.47	2.54	-9.3	65.26	-35.9	84.18	58.95	80.42	18.69	64.01	89.6	3.07	9.4	84.79	53.6	85.13	63.94	70.09	89.05	37.79	73.68	-2.78	44.68	68.4	90.32	63.92	18.47	11.72	45.93	36.52	2.4	56.39	95.31	-12.23	58.17	39.33	96.49	35.75	57.33	80.19	80.81	71.25	74.45
BRD-K83988098	alvespimycin	HSP inhibitor	HSP inhibitor	HSP90AA1	HSP inhibitor	1.13	-1.28	9.31	1.52	0	-35.77	6.91	48.22	50.63	13.54	27.85	14.74	2.36	-5.92	8.64	20.64	21.93	74.82	23.67	14.47	-5.22	2.4	17.9	50.53	-9.23	26.47	16.77	32.49	0	18.29	-11.15	15.78	0	16.24	1.09	68.44	67.72	10.91	18.28	6.45	5.32	18.83	14.6	9
BRD-K36377456	marmesin	Angiogenesis inhibitor			Angiogenesis inhibitor	0	-9.41	-2.47	0	-16.65	-35.66	-15.26	-4.5	17.34	13.74	18.33	49.68	-9.75	1.63	-21.96	-25.06	13.76	-6.24	40.41	-2.36	20.75	33.74	1.96	18.92	15.17	24.93	-2.18	-9.33	-32.01	13.58	35.85	-25.57	-13.13	8.1	8.21	51.57	-6.2	-7.08	-7.91	1.75	45.95	-35.45	43.47	25.8
BRD-A77722753	hydralazine	Vasodilator		AOC3, P4HA1	Vasodilator	0.85	-38.96	-0.95	-34.28	-12.34	-35.65	-37.48	-2.08	-75.81	-18.58	-1.23	-2.26	-17.62	-14.42	-48.93	-73.48	23.04	-19.33	-68.97	-28.57	15.3	-23.4	-17.67	-30.87	-19.32	-55.53	-35.86	-49.31	-2.57	-12	1.49	-62.71	-33.58	-6.18	-45.06	-30.37	-28.94	-51.8	-34.24	7.26	-18.56	-84.86	10.29	-38.91
BRD-K92428232	GSK-461364	PLK inhibitor		PLK1	PLK inhibitor	3.38	59.37	0	-80.73	-4.11	-35.6	65.88	-26.27	37.53	-3.31	-62.17	64.47	-25.94	-77.23	-5	0	32.57	-4.97	76.42	-45.28	0	-74.05	0	15.06	-44.82	43.8	63.59	0	4.19	34.42	-47.19	3.1	-3.6	0	-4.94	-68.35	-32.56	53.19	5.81	52.09	45.46	3.3	-43.48	-31.06
BRD-K47693913	evoxine	Furoquinoline alkaloid			Furoquinoline alkaloid	3.41	-83.96	3.05	-8.77	-44.16	-35.56	-65.75	-30.9	-62.54	-26.94	-47.55	15.99	-16.37	0	-60.33	-59.56	-45.61	-30.67	-66.43	-81.97	-41.82	-51.37	0.88	-26.26	-47.06	-73.44	-43.38	-51.09	-34.3	-73.36	-50.02	-53.17	-3.83	-26.49	-29.95	-80.22	-6.8	-76.74	-66.79	-12.44	-73.1	-52.58	-55.5	-25.13
BRD-K01624546	docosatrienoic-acid	LTB4 inhibitor			LTB4 inhibitor	0	-41.74	0	-2.12	-13.8	-35.53	-36.82	-47.61	-69.69	-30.69	-48.34	-40.36	-50.65	-36.83	-65.55	-59.02	-65.22	-49.49	-48.43	-95.86	-60.17	-79.71	-30.94	-69.82	-64.01	-79.48	-54.71	-44.53	11.36	-85.98	-71.26	-39.93	-74.93	-79.47	-17.09	-61.26	-30.83	-73.64	-55.29	-25.05	-79.83	-51.22	-47.55	-85.88
BRD-K39823328	VU-0366037-2	Glutamate receptor modulator		GRM4	Glutamate receptor modulator	0	-16.99	0	-24.95	-25.81	-35.42	26.39	15.09	22.14	-24.86	11.02	56.2	22.07	-7.12	12.64	6.24	20.01	39.6	-15.64	-26.58	16.43	-13.09	10.98	-50.27	-40.89	-41.93	-23.28	-9.3	4.93	11.36	58.27	-8.74	15.42	21.21	-2.71	4.23	-17.4	31.39	-18.19	13.59	13.99	-9.65	12.19	54.24
BRD-K37792168	denbufylline	Phosphodiesterase inhibitor		PDE4A, PDE4B, PDE4D	Phosphodiesterase inhibitor	0	-9.81	0	0	1.69	-35.2	-74.52	29.57	-35.94	18.67	-37.18	32.52	-44.14	-10.08	-34.89	-18.04	-60.22	24.78	-44.91	-34.77	3.31	-16.54	-4.4	-48.32	-8.46	-30.94	-36.72	44.06	-8.88	-52.61	8.16	0	4.83	44.23	10.75	-36.28	6.71	-36.66	21.77	5.58	-59.29	-51.89	-71.9	-40.22
BRD-K39120595	bithionol	Autotaxin inhibitor		ESR1, ESR2, MCL1	Autotaxin inhibitor	53.03	75.29	70.24	-83.09	9.96	-35.12	80.01	28.09	11.73	-12.72	8.32	50.78	-36.63	-2.65	5.01	47.38	26.02	0.53	21.09	51.1	49.06	26.73	-63.13	38.72	-9.57	49.74	-1.98	37.74	19.8	51.82	2.73	15.09	-5.33	-14.47	7.69	5.4	10.13	44.48	23.8	0.35	10.56	54.91	15.27	47.02
BRD-K62310379	fluticasone	Glucocorticoid receptor agonist	Glucocorticoid receptor agonist	NR3C1, CYP3A5, CYP3A7, NR3C2, PGR, PLA2G4A	Glucocorticoid receptor agonist	12.8	7.01	3.43	-8.81	-85.2	-34.85	-29.04	-3.85	-34.06	-85.19	-2.75	-3.84	-87.02	-7.74	-32.28	-63.25	-30.11	7.68	-4.55	9.23	5.25	-65.11	22.62	-38.94	-4.92	-4.83	-23.02	1.73	-51.13	-28.55	-20.09	-16.36	-4.2	-8.85	-1.09	-20.59	41.95	-22.53	0.95	-39.88	-1.87	-24.61	-2.01	-29.62
BRD-K84175871	pseudoephedrine	Adrenergic receptor agonist		ADRA1A, ADRA2A, ADRB1, ADRB2, ATF1, ATF2, ATF3, ATF4, ATF5, ATF6, ATF7, CXCL8, FOS, HRH1, IL2, JDP2, JUN, NFATC1, SLC6A2, SLC6A3, SLC6A4, TNF	Adrenergic receptor agonist	0	-12.97	-9.18	43.38	2.58	-34.72	-43.71	-57.78	-29.86	-46.99	-68.4	11.38	0	-24.47	-62.77	-80.17	-59.27	0	-71.99	-80.06	-43.78	-67.62	-1.52	-52.81	-43.63	-57.45	-85.29	-29.94	8.54	-48.14	-70.81	-2.64	-9.34	-43.26	-58.29	-52.4	-44.21	-35.61	-56.84	-30.63	-68.55	-41.22	-41.78	-65
BRD-K37846922	3,3'-diindolylmethane	CHK inhibitor		AHR, AR, CYP1A2, GUSB, IDO1	CHK inhibitor, Cytochrome P450 activator, Indoleamine 2,3-dioxygenase inhibitor	0	-49.88	1.16	-25.12	-3.77	-34.34	-80.05	-51.13	-14.55	-35.7	-22.51	-37.03	-48.79	-56.79	-78.12	-18.92	-31.83	49.74	-83.43	-45.17	-59.1	-94.43	9.71	-78.93	-70.09	-79.13	-78.6	-9.34	-35.06	-60.91	-54.96	-78.92	-21.7	34	-32.22	-41.94	-48.51	-62.62	-46.37	-79.61	32.95	-48.37	-18.75	-45.28
BRD-K64245000	GW-4064	FXR agonist		NR1H4	FXR agonist	-0.11	-34.76	0	-0.39	-33.02	-34.29	-6.5	-6.22	-57.95	-5.34	-10.77	-48.36	-25.49	-2.19	-32.49	-4.09	-31.76	-3.3	-45.01	10.25	-34.92	-37.16	-4.97	-33.28	-25.89	-76.13	-17.63	-6.46	-14.49	-7.12	-3.28	-73.68	-52.91	4.13	-59.65	-60.07	-23.09	-21.85	-48.94	13.91	-3.45	2.08	-6.17	-37.36
BRD-K93258693	GW-9662	PPAR receptor antagonist		PPARG, NCOA2, RXRA	PPAR receptor antagonist	-4.8	-83.26	-7.05	2.82	-15.03	-34.11	-50.13	-53.03	-76.26	-12.3	-63.08	-39.01	-63.95	-27.75	-55.24	-59.96	-70.29	-24.09	-28.91	-64.05	-9.8	-31.63	-4.38	-50.16	-27.67	-62.66	-63.01	-58.86	-10.49	-78.61	-88.08	-71.25	-61.04	-30.12	7.04	-59.07	-73.9	-65.7	-44.11	-35.8	-38.15	-58.07	-72.8	-14.24
BRD-K14200658	syrosingopine	Vesicular monoamine transporter inhibitor		SLC18A2, SLC18A1	Vesicular monoamine transporter inhibitor	0	-5.89	0.74	0	9.36	-34.06	-1.18	-3.07	-1.37	-0.74	10.12	27.09	-65.66	-0.78	7.36	4.81	-30.89	-3.52	33.1	-2.61	-12.32	3.38	-1.27	-1.55	1.76	3.38	7.55	-3.52	1.23	-1.23	-17.11	15.98	12.44	5.61	0	-3.24	9.12	-7.95	1.06	-1.9	18.91	35.9	7.62	5.67
BRD-A64228451	terreic-acid	BTK inhibitor		BTK	BTK inhibitor	-0.85	-58.47	-28.72	60.69	-61.99	-34.01	17.23	-7.15	-4.58	0.7	-31.88	-24.8	1.23	-45.33	-17.36	70.46	-10.65	36.39	-1.94	-7.96	-62.01	-1.9	1.79	33.2	-52.91	-4.25	-66.82	-39.98	-56.57	-16.4	-21.3	-9.13	-5.85	-12.31	-4.05	1.23	-29.47	18.82	-36.7	-9.05	3.35	0	5.56	-16.18
BRD-K26979635	NS-3694	Glutamate receptor antagonist		GRIK1	Glutamate receptor antagonist	0	-43.12	0	-2.73	-6.75	-34	-45.56	-67.17	-71.82	-32.86	-65.84	-40.17	-41.32	-26.84	-82.05	-67.81	-93.21	-28.5	-28.14	-83.17	-72.37	-59.67	-19.55	-74.22	-34.36	-65.98	-46.91	-87.29	-63.08	-79.58	-58.3	2.7	-74.78	-89.99	-54.78	-23.42	-56.44	-76.39	-47.59	-61.22	-80.08	-83.22	-83.03	-91.23
BRD-K59650319	YM-298198	Glutamate receptor antagonist		GRM1	Glutamate receptor antagonist	0	-45.74	-4.99	-2.64	-18.55	-33.95	-59.75	-60.26	-80.93	-16.84	-65.16	-43.71	-35.41	-37.34	-65.7	-30.22	-39.94	-53.54	-70.47	-86.37	-27.55	-21.2	0	-63.91	-80.96	-71.77	-91.44	-67.19	-2.04	-37.96	-62.39	-23.43	-63.65	-52.52	-51.24	-57.36	-29.23	-64.25	-65.16	-32.96	-64.97	-80.55	-45.29	-87.5
BRD-A98378129	talniflumate	Cyclooxygenase inhibitor		CLCA1	Cyclooxygenase inhibitor	0.6	-15.28	0	-5.96	-53.5	-33.93	6.53	2.18	-18.48	-35.04	-9.58	21.2	-16.49	-38.77	-39.25	8.01	-16.22	19.21	6.5	6.25	15.28	-21.37	-35.57	-52.19	-3.49	-27.57	-10.9	-15.24	10.28	-20.33	-6.37	20.25	-20	-24.34	-4.11	-40.81	-32.45	33.71	23.49	46.4	-54.57	-31.1	-40.36	19.73
BRD-K60511616	pravastatin	HMGCR inhibitor		HMGCR, SLCO1B1	HMGCR inhibitor	1.89	-35.13	1.27	-1.3	0.6	-33.86	-6.38	-6.83	-32.99	-37.46	-37.3	-14.82	-10.71	-48.57	-49.38	-48.84	-45.1	-6.54	-49.97	-44.68	-21.62	-32.11	-9.13	-26.63	-35.38	-44.04	-60.24	-51.06	7.59	-42.59	-53.53	-23.6	-3.03	-20.05	-20.96	-37.37	2.01	15.5	-34.92	16.88	-53.49	-2.79	-9.95	-15.82
BRD-K74913225	brinzolamide	Carbonic anhydrase inhibitor		CA2, CA1, CA7, CA12, CA14, CA4, CA5A, CYP2B6, CYP2C8	Carbonic anhydrase inhibitor	0	-3.35	0	-3.49	-17.78	-33.83	-32.85	-25.56	-39.06	-35.75	-32.08	-32.44	-50.05	-56	-18.44	-55.93	-60.64	-45.79	-48.19	-49.05	-5.26	-42.16	-21.96	-9.58	-35.57	-87.06	-21.17	-81.24	-11.8	-59.85	-66.78	-38.13	-25.91	-2.54	-3.42	-27.53	-48.63	-51.03	-44.42	-40.79	-8.84	-74.54	-48.28	-67.14
BRD-K39111395	BCL2-inhibitor	BCL inhibitor	BCL inhibitor	BCL2	BCL inhibitor	2.61	15.66	-1.02	15.52	0.56	-33.77	93.9	0.39	15.31	-13.17	21.75	17.58	15.9	18.87	35.06	61.95	32.87	9.12	1.3	16.81	17.46	-1.09	12.37	29.49	-9.69	13.88	-5.29	20.52	-26.57	42.23	17.23	-0.39	6.17	17.67	42.97	10.44	88.25	1.76	11.49	5.87	13.4	5.25	15.16	-6.56
BRD-K36638830	anabasine	Acetylcholine receptor agonist			Acetylcholine receptor agonist	0	-29.31	0	-1.3	7.46	-33.74	-16.61	-26.67	-81.66	-19.35	-52	-39.39	-17.53	-1.83	-58.39	-37.11	-41.97	-51.35	-51.39	-48.4	-27.89	-19.6	-11.52	-41.1	-17.13	-65.01	-37.78	-14.05	-29.1	-77.64	-21.48	-19.49	-51.69	5.92	-36.97	-68.57	-54.98	-27.45	-36.48	-16.67	-54.13	-44.39	-41.12	-23.86
BRD-K95655893	MAZ-51	VEGFR inhibitor		FLT4	VEGFR inhibitor	-27.88	-58.72	-37.49	-4.58	-16.74	-33.73	-29.08	-1.95	-91.04	-59.61	-66.14	-71.36	9.27	9.99	-61.36	35.94	-37.12	-4.06	-69.86	-48.2	45.8	6.97	-14.94	-10.77	-15.13	-46.65	-29.11	58.21	-72.33	-45.09	-45.78	-80.36	-32.08	19.94	74.21	15.36	-39.75	-13.34	-43.64	-32.15	-23.07	-28.1	-2.34	-28.68
BRD-K36198571	WAY-170523	Metalloproteinase inhibitor		MMP13	Metalloproteinase inhibitor	0	29.85	0	2.58	1.52	-33.68	83.86	34.15	77.55	44.94	71.47	62.1	56.82	-3.63	23.91	46.28	53.61	23.78	69.77	78.18	47.55	13.69	1.9	70.04	48.12	84.59	49.62	84.27	-1.48	85.01	11.76	73.64	0	24	-11.76	50.63	-6.18	53.44	58.33	26.21	42.32	75.99	15.79	78.54
BRD-K19525698	ozagrel	Thromboxane synthase inhibitor		TBXAS1	Thromboxane synthase inhibitor	-3.24	-84.04	-24.57	23.82	-6.42	-33.49	-49.99	-29.67	-68.72	-51.16	-42.42	-73.11	-6.09	-34.29	-64.61	-55.9	-33.13	-32.46	-79.7	-86.27	-23.44	-74.06	-3.35	-35.21	-77.82	-74.1	-83.5	-55.04	-10.75	-87.63	-59.71	-32.77	-4.55	-5.74	-3.95	-32.26	-43.73	-34.78	-38.85	-54.36	-64.68	-81.97	-4.62	-65.46
BRD-K26669427	WR-216174	PFMRK inhibitor			PFMRK inhibitor	0	19.41	1.2	0	15.03	-33.36	54.22	-5.49	5.04	-2.04	46.14	2.88	-42.09	-19.58	4.97	58.35	31.75	45.9	25.5	31.65	25.51	3.35	1.66	23.74	-32.83	6.59	-55.39	20.31	23.52	22.59	-8.1	0	-55.61	5.67	4.23	1.87	61.5	10.78	46.11	-5.74	4.43	-12.51	20.94	14.83
BRD-K78637815	LY-320135	Cannabinoid receptor antagonist		CNR1	Cannabinoid receptor antagonist	1.8	-19.16	-3.28	-3.7	50.94	-33.3	-41.66	-28.94	-66.73	-18.87	-31.59	-31.54	-3.1	-21.66	-58.55	-36.31	-7.72	-87.07	-53.08	-74.52	6.21	-35.8	-9.83	-42.1	-54.59	-6.59	-63.86	-92.28	-2.22	-70.17	-23.24	-32.91	-38.49	-70.9	-53.31	-39.49	-18.51	-41.08	-61.51	-35.53	-37.77	-48.17	-41.58	-46.94
BRD-A51829654	BRL-15572	Serotonin receptor antagonist		HTR1D, HTR1A, HTR1B, HTR1E, HTR1F, HTR2A, HTR2B, HTR2C, HTR6	Serotonin receptor antagonist	0	-8.96	-0.53	2.43	-17.03	-33.26	12.35	-44.76	-59.82	-0.53	-50.23	23.71	-0.74	-18.63	-26.69	-26.32	-17.03	18.25	-26.94	-38.99	32.53	4.86	8.12	-42.39	-29.59	-18.25	-55.74	-17.46	9.23	-31.92	-12.66	-0.74	-1.02	-2.83	1.2	23.29	9.75	14.95	22.12	22.61	-62.01	-81.04	17.03	-52.85
BRD-K53523901	arctigenin	MEK inhibitor		ADIPOR1, AHR, CHUK, MAP2K1	MEK inhibitor	0	-22.16	0.56	14.85	0	-33.15	2.35	-3.32	-49.84	-1.55	-46.95	-1.48	-30.69	-13.65	-65.8	-24.4	-49.29	-32.76	-30.16	-46.54	-22.26	-11.85	-45.72	-8.66	-55.18	-28.81	-23.52	-3.15	-19.58	-39.44	-1.9	1.34	-1.88	-37.11	-0.67	-41.56	-32.89	0	-50	-70.02	-68.92	-5.21	-65.23	8.9
BRD-K62206109	VUF-5681	Histamine receptor antagonist		HRH3	Histamine receptor antagonist	0	-61.95	0	0	-12.33	-32.73	-14.43	-33.68	-39.66	-29.55	-49.18	-69.28	-16.68	-32.35	-6.84	-45.64	-16.08	-28.41	-59.84	-81.07	-32.91	-76.32	25.49	-33.2	-35.33	-62.24	-77.13	-53.85	-30.98	-85.81	-65.23	-55.45	-2.08	36.83	-2.26	-25.15	-38.54	-13.21	-44.64	-40.97	-54.41	-56.56	-47.01	-59.44
BRD-K62965247	tipifarnib-P2	farnesyltransferase inhibitor		FNTA, FNTB	farnesyltransferase inhibitor	10.87	64.54	61.74	-80.99	-7.54	-32.69	4.8	-9.06	6.02	-0.11	5.18	-1.34	-25.65	-11.03	-15.23	-41.69	34.45	18.75	-44.93	2.68	-16.95	-43.15	8.66	-9.7	41.19	41.49	3.92	-20.89	40.09	-16.28	-34.65	-8.54	48.09	21.61	-31.61	14.12	-54.72	41.87	14.72	45.59	8.16	3.02	43.17	41.97
BRD-K66766661	17-beta-estradiol	Estrogen receptor agonist	Estrogen receptor agonist	ESR1	Estrogen receptor agonist	0	-70.02	-1.28	17.23	13.62	-32.43	-11.56	-55.39	-80.91	-30.13	-52.78	-40.88	36.82	-32.68	-65.77	-56.6	-17.98	-37.05	-58.76	-62.12	-36.71	-20.25	-15.55	-5.8	-64.59	-69.65	-80.29	-18.84	-24.88	-79.44	-71.79	-71.3	-43.51	10.78	-69.68	2.95	-12.58	-72.59	-30.3	-19.5	-70.59	-36.52	-14.45	-70.03
BRD-K78959463	FPL-64176	Calcium channel activator		CACNA1C, CACNA1S	Calcium channel activator	0	-74.72	-16.65	1.06	7.38	-32.37	-89.96	-46.84	-77.17	-34.39	-71.22	-33.66	-17.77	-7.56	-40.02	-37.78	-68.91	-74.88	-57.14	-76.63	-60.66	-61.33	-57.23	-44.67	-32.26	-87.3	-90.66	-17.74	-58.76	-38.4	-72.63	-48.43	-5.29	-20.69	-0.95	-26.2	-19.39	-62.15	-29.16	-90.21	-95.26	-36.95	-48.49	-63.85
BRD-K24675965	LY-288513	CCK receptor antagonist		CCKBR	CCK receptor antagonist	-1.02	-23.12	0	0	-48.94	-32.24	-58.02	-8.07	-27.54	2.78	-15.85	14.39	21.82	-1.23	-29.12	-14.67	-28.3	29.42	-38.19	11.38	25.36	20.21	24.27	-20.81	-7.75	-3.59	-53.43	-31.81	7.53	4.91	-25.35	-13.41	0	53.7	-12.49	8.45	4.75	-24.06	6.4	-41.06	9.6	-8.16	59.82	11.46
BRD-K11107424	tiotidine	Histamine receptor antagonist		HRH2	Histamine receptor antagonist	0	-2.85	2.61	-11.35	-45.38	-32.18	14.39	-43.41	-33.74	-38.1	-12.87	21.87	-63.71	-35.25	-20.22	-72.24	-55.71	28.11	-39.34	-18.39	-58.57	-55.83	68.12	-24.33	-11.65	-22.65	-43.05	-10.3	-16	-19.2	-19.92	-38.82	-40.81	42.91	-11.17	52.97	-3.43	-12.36	14.05	-16.21	13.06	11.65	63.09	-59.37
BRD-K49404994	levetiracetam	Calcium channel blocker		SV2A, CACNA1B, SCN1A	Calcium channel blocker	0.39	-13.81	1.3	-5.99	-44.47	-32.17	-26.9	-29.9	67.34	-2.1	12.42	-5.85	38.43	74.51	-16.89	9.65	-63.87	12.31	-20.57	12.13	34.01	-84.8	12.76	5.55	11.95	-35.28	58.8	0.71	2.41	17.22	24.92	-26.01	-44.71	1.3	1.34	23.08	26.55	9.65	1.2	2.61	26.59	-19.98	13.14	-5
BRD-K88741031	methyl-2,5-dihydroxycinnamate	EGFR inhibitor		EGFR	EGFR inhibitor, Tyrosine kinase inhibitor	0.11	-17.98	-8.31	30.3	0.28	-31.87	-31.51	-22	-77.14	-8.15	-36.02	5.36	-30.94	-28.51	-38.56	21.24	-68.37	-21.34	-77.15	-79.77	-12.86	-33.74	-14.83	-26.54	-20.89	-58.7	-52.2	-30.42	-29.9	-83.69	-10.83	-36.84	-0.46	-22.14	-0.28	-73.28	-24.59	-30.5	-45.62	-77.41	-50.6	-28.24	-43.08	-52.66
BRD-A26845397	isamoltan	Adrenergic receptor antagonist		ADRB1, ADRB2	Adrenergic receptor antagonist	0	-35.59	0	1.09	1.09	-31.71	-27.53	-16.91	-55.86	-8.86	-42.35	-33.65	-1.09	-1.06	-35.52	-47.05	-41.31	-12.21	-26.82	-53.07	-54.92	-4.16	-6.44	-27.84	-41.41	-20.35	-38.47	-11.51	-18.29	-66.79	-22.84	-3.22	-1.06	-21.16	-1.09	-27.85	-32.62	-38.95	-12.85	-1.06	-52.71	-37.79	-43.5	-28.42
BRD-K52075715	oxibendazole	Tubulin inhibitor	Tubulin inhibitor	TUBB, TUBB4B	Tubulin inhibitor	0	-67.69	-22.78	28.24	0	-31.52	-10.63	-34.02	-9.1	-2.32	-2.99	-59.4	-0.92	-13.33	-17.35	-8.79	-28.62	-7.28	-32.41	-8.4	-4.76	-4.54	-49.68	18.72	-55.77	-30.29	-63.64	40.86	-96.09	1.55	-1.23	-84.68	-7.65	28.87	-21.89	-92.88	-60.09	-11.82	-12.24	44.76	-36.94	-2.4	13.77	-30.6
BRD-K51751936	alfadolone	GABA receptor agonist			GABA receptor agonist	2.29	-21.55	-2.08	-23.09	30.56	-31.42	10.24	20.01	-66.72	7.12	-18.78	-25.44	-34.52	-37.88	-52.4	-6.17	-13.13	-51.33	-22.83	-44.53	10.67	10.24	-8.25	-55.41	-17.86	-65.55	-54.25	-37.92	-2.51	-32.03	-11.19	-7.65	-17.81	-69.27	-1.81	-23.28	-9.11	-20.25	-15.66	-19.34	-24.62	-62.32	-12.28	-35.21
BRD-K13725475	rhodomyrtoxin	Cytotoxic agent			Cytotoxic agent, DNA intercalator	0	-67.46	-0.7	-60.08	-43.32	-31.39	-23.21	-39.01	-59.3	-35.09	-42.87	-30.42	-19.92	-83.37	-42.12	-12.05	-81.44	-62.42	-33.65	-22.15	12.56	-23.53	-53.74	-77.66	-53.5	-44.04	-79.86	-8.84	-50.01	-27.76	-70.18	-39.17	-73.9	-23.13	-59.28	-53.71	-72.33	-77.62	-5.1	-36.49	-26.99	-26.56	-7.35	-35.11
BRD-K48168960	propylthiouracil	Thyroid peroxidase inhibitor		TPO, DIO1	Thyroid peroxidase inhibitor	0	2.89	0	5.64	-3.03	-31.36	-1.76	2.92	-13.24	-46.53	-57.64	-8.21	-7.79	-52.06	-13.24	-22.38	-8.45	0	-52.74	-14.09	22.27	-57.83	9.52	-7.12	-5.64	-12.72	-19.52	-22.15	0	-17.78	-56.6	0	-2.45	2.91	0	17.77	8.56	2.56	26.58	-54.48	3.39	0	-10.1	-14.21
BRD-A81866333	CGS-21680	Adenosine receptor agonist	Adenosine receptor agonist	ADORA2A, ADORA1, ADORA2B, ADORA3	Adenosine receptor agonist	-1.83	-41.99	-1.2	57.6	39.65	-31.29	22.65	27.26	21.54	1.83	38.13	50.62	20.16	25.24	31.11	7.92	23.27	14.96	0	25.87	2.29	18.87	12.94	20.62	14.3	45.56	17.04	-9.7	10.07	17.7	42.73	5.64	-20.1	44.35	29.41	23.91	-1.41	16.31	31.09	29.17	23.3	25.22	21.85	33.34
BRD-K82357231	desloratadine	Histamine receptor antagonist		HRH1	Histamine receptor antagonist	0	-3.66	0	-0.88	-18.1	-31.11	51.29	-8.32	72.87	-4.55	35.38	44.45	-2.11	-9.23	-61.87	-66.9	30.22	57.56	36.81	-36.12	-52.69	-76.5	-1.48	-55.04	11.04	77.7	-65.7	-0.88	-7.08	-33.49	-48.04	7.69	26.31	-48.98	-28.73	33.57	-48.26	57.68	26.27	42.55	77.4	-12.23	38.79	-17.52
BRD-K86191271	cytosporone-b	NUR77 receptor agonist		NR4A1	NUR77 receptor agonist	0	-25.64	0	16.87	-12.92	-30.96	-30.13	4.9	-28.6	21.32	-73.97	-9.62	1.39	-20.9	-24.88	-18.77	-24.55	-4.12	-76.34	-48.05	-7.72	-18.67	42.18	-45.66	-54.9	-62.24	-70.94	12.03	31.8	-43.9	13.2	-19.07	19.23	-12.12	19.17	-26.54	-29.17	-53.15	15.29	62.92	-9.97	-9.02	24.91	-68.36
BRD-A18202423	CPCCOEt	Glutamate receptor antagonist		GRM1	Glutamate receptor antagonist	-1.44	-27.55	-42.07	1.8	0	-30.94	-7.33	9.12	-47.62	16.93	-9.55	-2.29	17.71	2.45	2.24	-28.25	-38.42	-2.18	-20.77	-17.21	-21.55	-2.04	-9.04	-56.66	-17.32	-10.83	-37.18	-2.26	27.39	-38.03	17.34	9.56	-21.92	6.37	2.08	-10.7	34.69	-22.48	-24.75	-2.29	-17.05	-75.03	-17.25	-18.58
BRD-K02581333	protein-tyrosine-phosphatase-inhibitor-IV	Tyrosine phosphatase inhibitor		PTPN1, PTPN11	Tyrosine phosphatase inhibitor	13.54	1.13	0.42	0.48	0	-30.67	24.68	6.52	52.51	45.32	-7.86	-64.68	-54.7	12.61	44.14	-5.74	75.47	32.69	18.49	33.84	-56.26	-39.02	-5.92	16.22	15.62	17.85	33.54	-41.11	-48.86	-34.19	54.18	-61.94	73.39	33.16	-41.28	-21.93	58.57	6.51	36.75	-30.91	65.28	22.55	44.57	-42.06
BRD-A45140972	meclocycline	Bacterial 30S ribosomal subunit inhibitor	Bacterial 30S ribosomal subunit inhibitor		Bacterial 30S ribosomal subunit inhibitor, Bacterial 50S ribosomal subunit inhibitor	3.84	-7.6	1.52	-12.11	0.21	-30.65	15.03	30.04	22.8	8.32	-38.78	13.04	-9.77	8.14	42.12	-53.71	13.39	13.07	12.11	-29.18	-19.72	11.11	2.11	-11.98	-5.67	22.61	6.5	-18.72	11.73	-32.64	23.28	-1.66	-1.41	-5.66	22.03	13.25	53.29	14.3	-13.36	-27.95	67.29	-1.11	11.45	-13.27
BRD-K10870738	CDC	Lipoxygenase inhibitor		ALOX12, ALOX5	Lipoxygenase inhibitor	20.25	21.23	0.74	0	3.98	-30.35	63.16	-0.99	72.89	-0.78	19.16	24.11	6.88	7.21	-1.2	-9.28	11.63	47.6	13.94	13.57	8.63	14.47	27.5	23.34	3.56	32.78	24.57	6.59	7.48	46.49	10.51	5.19	4.44	12.01	3.81	23.55	0.95	40.72	36.55	60.37	37.21	-4.51	42.52	45.44
BRD-K06593056	LE-135	Retinoid receptor agonist		RARB	Retinoid receptor agonist	0.04	23.29	53.96	-13.23	3.08	-30.35	49.29	18.75	16.2	20.9	11.31	14.93	-0.56	4.66	-1.23	28.7	51.18	0.63	49.04	21.79	47.02	28.25	-0.39	20.51	-0.39	37.77	9.47	31.52	52.23	58.96	68.23	1.48	-72.21	-0.78	-1.2	33.04	17.61	35.6	9.89	8.62	9.71	1.26	4.23	45.46
BRD-K05901394	terguride	Dopamine receptor agonist		DRD2, HTR2A, HTR2B, ADRA1A, ADRA2A, ADRA2B, ADRA2C, DRD3, DRD4, HTR1A, HTR1B, HTR1D, HTR2C, PRL	Dopamine receptor agonist, Serotonin receptor antagonist	0	-18.06	-2.32	2.16	-13.23	-30.32	-34.69	-23.7	-32.05	5.63	-27.69	-2.47	-7.04	8.38	-24.22	-9.46	-24.21	-18.84	-91.6	-39.96	-53.2	-47.03	-11.87	-35.98	-15.7	-10.44	-17.28	-74.95	15.79	-74.9	-34.25	-16.9	-16.34	13.88	-21.74	6.59	1.55	-32.56	-34.58	-15.76	4.51	-17.45	-43.92	-65.66
BRD-K11742128	triprolidine	Histamine receptor antagonist		HRH1	Histamine receptor antagonist	-5.22	-21.44	0	13.37	-10.23	-30.31	-10.39	-22.56	-39.04	-83.23	-45.43	-16.69	3.45	-34.52	-64.93	-71.47	-58.11	-6.16	-24.02	-49.23	-4.94	-2.82	-7.77	-27.09	-22.59	-39.05	-48.39	-71.16	-55.59	-37.43	-29.92	-39.55	-10.89	-10.7	1.98	-15.72	-27.27	-35.39	-7.97	-77.44	-38.53	-54.94	-2.71	-59.83
BRD-K77987382	mebendazole	Tubulin inhibitor	Tubulin inhibitor	TUBA1A, TUBB, TUBB4B	Tubulin inhibitor	-0.01	-59.13	-16.36	5.5	83.86	-30.11	9.37	19.86	38.13	58.69	27.72	1.02	7.1	17.76	40.68	-54.88	27.66	-38.24	-16.13	37.05	31.7	64.77	-81.16	75.15	-31.36	-45.62	-7.69	92.36	-92.6	8.05	68.71	-69.16	2.11	22.13	0.02	-43.02	-72.38	0.81	31.44	38.34	-7.6	35.6	-0.99	25.72
BRD-A03359064	ICI-89406	Adrenergic receptor antagonist		ADRB1, ADRB2	Adrenergic receptor antagonist	-1.55	-5.29	-2.64	-3.99	4.54	-29.71	-20.16	-4.48	-48.35	-27.7	-77.19	-38.6	-37	-10.99	-36.85	-42.24	-37.39	-47.62	-69.54	-76.28	-22.08	-27.05	-24.6	-52.86	-2.15	-31.81	-14.24	-52.91	19	-52.83	-59.77	-40.14	-25.97	-51.53	-1.58	-45.67	-18.78	-8.35	-28.95	-39.48	-92.4	-23.82	-45.35	-49
BRD-K36927236	glibenclamide	Sulfonylurea		KCNJ11, ABCC8, CFTR, KCNJ5, KCNJ8, ABCA1, ABCB11, ABCC9, CPT1A, KCNJ1, SLCO2B1, TRPA1	Sulfonylurea	-0.53	-60.05	0.49	4.64	0.81	-29.6	-45.34	-16.47	-18.73	-5.94	-60.73	-12.21	-3.42	-7.05	16.62	11.14	-8.21	24.4	-10.86	-42.25	1.16	-8.21	0.88	-13.63	-16.76	-77.16	-57.41	-12.19	36.14	-42.24	2.5	-1.41	-1.2	13.69	10.92	-12.68	9.6	-30.16	-26.42	-10.68	-10.97	-41.19	37.14	-57.94
BRD-K32610195	androstenedione	Cytochrome P450 inhibitor		AKR1C3, HSD17B1, HSD3B1	Cytochrome P450 inhibitor	0	-45.08	1.2	-1.94	9.95	-29.56	-30.59	11.27	-51.53	22.85	-32.22	-3.28	-37.15	-64.41	-39.68	-44.75	-60.67	20.32	-43.11	-53.98	-29.04	31.42	49.85	-23.82	-21.47	-60.24	-63.07	-22.26	1.34	-81.84	-3.77	-34.54	1.62	-25.41	-32.15	-27.51	-2.18	-42.3	-14.79	-17.91	-38.97	-10.49	-2.32	-41.67
BRD-K59633790	VU-0420363-1	SARS coronavirus 3C-like protease inhibitor			SARS coronavirus 3C-like protease inhibitor	16.24	-70.88	-25.89	-24.69	0	-29.35	-71.14	-82.63	-90.71	0	-94.79	-71.5	-8.43	-95.02	-76.25	-86.07	-93.38	-86.15	-81.06	-90.68	-82.44	-90.64	-9.92	-92.28	-85.41	-93.59	-73.95	-80.6	27	-91.99	-86.96	-12.77	-48	-76.49	-18.34	-83.09	0	-88.89	-53.51	-56.77	-86.76	-74.96	-87.06	-95.49
BRD-K47150025	KI-8751	VEGFR inhibitor	PDGFR/KIT inhibitor	KDR	VEGFR inhibitor, KIT inhibitor, PDGFR receptor inhibitor	0	5.36	6.02	12.74	-47.35	-29.18	61.17	4.84	24.32	1.48	10.09	27.41	5.7	41.04	0	0.78	32.43	4.65	31.17	48.23	26.57	11.32	-8.74	3.95	2.22	34.7	-3.45	31.02	-12.71	71.36	17.77	26.03	-7.47	3.01	11.86	3.55	31.57	19.12	8.76	32.51	36.57	16.63	68.71	18.09
BRD-K40656405	L-165041	PPAR receptor agonist	PPAR receptor agonist	PPARD	PPAR receptor agonist	-1.02	-68.32	-8.42	1.52	-15.92	-29.17	-25.84	13.78	30.41	21.22	-31.24	71.4	55.97	-15.22	26.91	28.12	2.15	-62.62	6.65	40.89	-13.77	49.04	2.25	77.57	-33.79	-58.05	-93.57	-28.34	-1.41	22.05	43.16	-49.73	-17.11	32.22	90.36	76.5	66.05	-22.61	-7.85	11.61	2.11	-72.55	53.34	-11.13
BRD-K09907482	PRL-3-inhibitor-I	Tyrosine phosphatase inhibitor		PTP4A3	Tyrosine phosphatase inhibitor	0	-64.44	-8.05	3.18	-5.17	-29.07	-40.79	-56.92	-72.27	-18.96	-62.69	-29.34	-9.61	-28.38	-39.4	-56.23	-66.64	-24.05	-64.13	-68.93	-56.33	-28.74	-9.54	-82.76	-57.78	-97.04	-63.09	-24.93	-20.58	-68.36	-65.59	-17.25	0	-41.56	16.37	-42.92	26.65	-93.77	-51.47	-48.55	-69.86	-46.58	-22.87	-82.67
BRD-A55393291	testosterone	Androgen receptor agonist	Androgen receptor modulator	AR, CYP19A1, CYP2C19, CYP2C8, CYP3A5	Androgen receptor agonist	20.92	-39.77	21.03	-11.76	-48.48	-28.97	-27.01	-52.75	-56.83	-57.24	-85.3	-16.57	-9.23	-53.97	-82.03	-86.2	-76.76	-37.36	-81.98	-95.21	-78.72	-81.24	-20.1	-99.22	-15.13	-72.92	-32.72	-46.03	-32.85	-52.83	-45.04	-26.28	-33.26	-40.18	-5.91	-37.45	-31.63	-28.93	-18.97	-30.66	-61.24	-49.35	-55.96	-75.89
BRD-K38003476	clocortolone	Glucocorticoid receptor agonist	Glucocorticoid receptor agonist	NR3C1, PLA2G1B	Glucocorticoid receptor agonist, Steroid	-0.67	-51.36	0	-0.67	-75.94	-28.95	-64.77	-54.64	-33.07	-67.82	-56.37	-0.88	-56.37	-14.66	-90.87	-89.29	-79.64	28.28	-46.86	-5.88	-37.12	-89.49	-24.29	-66.47	-39.65	-33.37	-70.08	-35.78	-41.28	-13.25	-20.91	-54.57	-81.72	-21.21	-39.59	-49.82	16.93	-55.17	-78.16	-27.68	-69.02	-42.04	-21.94	-74.86
BRD-K14888893	minoxidil	KATP activator		KCNJ8, ABCC9, KCNJ1, KCNJ10, KCNJ11, PTGS1, REN	KATP activator, KIR6 channel (KATP) activator, Vasodilator	14.42	12.89	4.88	-7.72	28.58	-28.82	34	25.66	40.75	45.23	-37.77	42.77	15.44	11.4	44.08	-6.29	45.79	43.48	-55.94	42.23	-21.63	28.88	66.82	12.56	65.85	-69.77	28.9	-18.02	40.52	-54.88	60.42	4.26	33.05	14.55	57.66	-26.57	17.01	37.58	37.73	49.68	49.52	-40.51	-14.26	34.26
BRD-K20986251	lithocholic-acid	FXR antagonist	Bile acid, FXR antagonist, Vitamin D receptor agonist	NR1I2, VDR, GPBAR1, MDM2, MDM4, NR1H4, PTPN1	FXR antagonist, MDM inhibitor, PXR ligand, Tyrosine phosphatase inhibitor, Vitamin D receptor agonist, Vitamin D receptor ligand	-3.59	-49.18	0	2.5	-36.46	-28.54	-25.58	-65.68	-42.06	-73.97	-54.05	-43.04	-25.02	-91.58	-71.49	-49.05	-27.49	-71.53	10.19	-43.14	-32.35	-84.8	-49.69	-1.62	-67.23	-35.42	-87.59	-43.11	-53.96	-24.79	-69.41	-26.21	-3.95	-62.46	-43.72	-86.29	-36.53	-37.29	-71.93	-43.57	-70.18	-91.78	-48.14	-81.17
BRD-K64881305	ispinesib	Kinesin-like spindle protein inhibitor		KIF11	Kinesin-like spindle protein inhibitor	1.94	50.58	0	-62.33	-24.01	-28.5	-1.62	11.21	62.8	-6.41	4.33	69.28	-44.48	-48.36	-22.69	-12.63	14.9	0	9.73	15.34	51.96	-26.49	0	11.3	-22.28	78.41	-3.08	-25.74	19.88	16.02	23.1	15.01	-49.33	1.66	-8.2	-24.87	-2.83	54.99	59.71	68.6	33.88	39.94	-2.01	36.91
BRD-K31699485	DMEOB	glutamate receptor modulator			glutamate receptor modulator	-55.36	-96.35	-59.74	0	-3.03	-28.49	-50.98	-28.24	-60.2	-23.86	-94.57	-69.08	-25.55	-64.6	-72.37	-93.25	-84.53	-43.13	-95.89	-78.48	-66.16	-47.89	-37.58	-74.67	-95.4	-84.89	-96.5	-67.57	-35	-95	-75.32	-47.99	-40.46	-65.03	-24.9	-80.65	-44.99	-71.51	-71.19	-39	-97.56	-88.15	-84.71	-73.32
BRD-K26015241	ODQ	Guanylyl cyclase inhibitor		GUCY1A2, GUCY1A3, GUCY1B3	Guanylyl cyclase inhibitor	0	-11.35	0	-1.55	-32.35	-28.42	-12.64	-33.85	-7.45	-18.96	-34.03	-22.45	-8.45	-34.57	1.21	-0.81	-28.97	7.49	-17.72	-35.41	-18.91	-44.62	0	22.94	-33.79	-29.62	-51.59	-16.41	-1.55	-36.86	-55.67	-6.66	1.02	-16.68	-9.49	-54.03	-9.64	4.37	-15.96	-39.71	-15.68	-20.55	-9.78	-58.66
BRD-K28115081	apafant	Platelet activating factor receptor antagonist		PTAFR	Platelet activating factor receptor antagonist	0	5.22	0	1.09	-31.67	-28.41	8.44	-2.08	18.59	-21.24	12.98	1.87	-22.8	-21.78	-2.08	-59.2	12.74	1.8	8.41	-1.23	26.28	-1.94	25.38	-15.59	1.3	1.92	-38.59	-16.99	21.54	-21.69	-19.68	-17.67	0	20.1	17.55	14.58	4.1	14.73	17.25	11.06	-1.02	9.86	-28.07	20.21
BRD-K93176058	AC-55649	Retinoid receptor agonist	Retinoid receptor agonist	RARB, RARA	Retinoid receptor agonist	-34.5	-91.73	-39.94	-0.6	-6.13	-28.31	-98.92	-43.36	-91.7	-33.85	-80.9	-41.59	-17.72	-63.93	-68.01	-81.42	-79.06	-51.98	-69.35	-98.56	-88.38	-81.76	-6.89	-82.05	-49.87	-96.19	-91.1	-97.12	-48.41	-99.47	-80.1	-70	-43.42	-79.93	-45.68	-58.61	-67.13	-96.89	-81.76	-74.93	-88.98	-86.21	-85.02	-99.37
BRD-A68930007	ouabain	ATPase inhibitor	ATPase inhibitor	ATP1A1, ATP1A2, ATP1A3, ATP1A4, ATP1B1, ATP1B2, ATP1B3, ATP1B4, FXYD2	ATPase inhibitor	13.34	76.44	18.46	-88.66	73.81	-28.22	23.45	11.99	65.87	-74.19	-1.23	14.36	-20.38	7.38	28.85	12.87	39.55	-66.98	57.45	8.17	12.6	1.33	-93.29	52	-70.34	71.58	17.54	23.25	-2.54	5.64	-22.92	55.97	-31.27	1.01	0.67	33.64	14.73	12.2	-4.63	5.83	14.06	38.49	-14.55	-43.94
BRD-K04170657	psoromic-acid	Ras GTPase inhibitor			Ras GTPase inhibitor	-0.71	-67.51	-2.89	-6.83	-8.24	-28.11	-51.41	-45.91	-49.19	-14.79	-51.67	-0.68	-28.29	-65.22	-39.19	-29.48	-45.96	-47.09	-59.77	-63.86	-42.62	-54.3	-37.93	-75.75	-63.4	-55.02	-84.21	-41.81	-12.97	-81.25	-43.89	-23.77	-60.76	-44.76	-44.14	-59	-48.65	-15.34	-67.04	-50.55	-83.31	-69.72	-77.23	-51.52
BRD-A29437505	RWJ-21757	TLR agonist		TLR7	TLR agonist	0	-72.57	10.46	23.81	-2.4	-28.06	21.38	2.85	1.76	47.41	-21.76	-25.9	-14.13	-20.36	3.1	-9.45	-13.95	-28.92	-40.47	-30.27	-38.16	28.49	34.31	-56.14	-32.04	-2.78	-13.66	-48.5	1.87	-7.57	33.18	2.57	7.46	2.18	40	-5	-62.45	-41.44	20.88	35.58	-44.66	-3.59	-20.12	-12.9
BRD-K67680372	CI-966	GAT inhibitor		SLC6A1	GAT inhibitor	0.53	-4.7	0	0	-1.27	-27.89	8.18	1.55	-14.44	0	-23.33	-6.52	-3.42	25.32	-16.05	-26.41	15.25	-3.41	-48.57	-14.8	-21.24	-23.66	10.53	-1.23	-28.12	-10.72	-47.37	0	-36.43	-26.39	1.19	-10.29	0.63	-0.67	6.31	26.07	-15.58	-54.38	-66.94	-0.95	4.61	-27.51	-10.85	-12.22
BRD-A77349281	RK-682	Tyrosine phosphatase inhibitor		HPSE, PTPN1	Tyrosine phosphatase inhibitor	41.91	28.21	2.5	-7.78	-11.08	-27.78	33.88	21.41	63.46	-1.37	53.35	9.07	14.9	11.1	21.78	-26.64	52.04	71.09	-36.31	7.76	46.75	-52.64	55.67	49.86	24.69	16.7	22.91	-0.94	-52.02	33.47	-5.05	5.31	1.64	78.19	-66.95	71.44	26.14	29.61	-16.63	56.43	75.57	50.19	48.2	58.51
BRD-K55991774	BAS-09104376	HIV integrase inhibitor			HIV integrase inhibitor	0	-70.06	0	0	6.27	-27.76	-72.71	-90.65	-95.28	-80.82	-87.62	-78.27	-4.54	-91.71	-83.22	-78.72	-97.95	-64.15	-96.19	-95.84	-84.17	-91.93	-53.84	-96.76	-78.61	-95.94	-88.05	-47.33	-34.92	-96.01	-87.52	-26.05	-74.92	-89.33	-5.2	-90.89	-65.53	-94.27	-41.8	-95.81	-93.79	-85.88	-68.5	-94.31
BRD-K64451768	GANT-58	GLI antagonist		DHH, GLI1, IHH	GLI antagonist	0	-63.3	0	-0.42	6.25	-27.57	-64.62	-41.61	-54.19	-1.09	-31.27	-33.39	65.32	-74.07	10.54	-74.22	-8.77	-90.41	-99.54	-63.63	-96.26	-54.2	-6.94	-44.23	-84.31	-93.07	-95.23	-91.2	0.56	-83.99	-61.1	-29.45	-23.78	-0.95	-60.28	-59.63	-92.46	-43.37	-57.69	-45.42	-27.18	-46.47	-93.78	-94.07
BRD-K92731339	perindopril	ACE inhibitor		ACE	ACE inhibitor	-18.01	-55.26	-32.86	0.49	-30.63	-27.33	-46.88	9.31	-42.51	-53.14	-62.57	-27.19	-30.36	-35.33	-34.79	-40.23	-4.26	17.64	-95.8	-56.09	-78.81	-49.09	18.14	-67.97	-27.79	-53.11	-69.77	26.56	-45.1	-44.97	-60.86	-29.25	-26.55	24.44	-28.16	-59.46	-45.2	-45.2	-13.82	-0.88	-46.1	-79.37	5.21	-55.24
BRD-K85925969	zalcitabine	Nucleoside reverse transcriptase inhibitor	Nucleoside reverse transcriptase inhibitor		Nucleoside reverse transcriptase inhibitor	0.18	-4.9	11.18	-21.32	-22.38	-27.28	-25.84	4.26	-32.21	4.87	-81.65	-20.77	-54	11.65	-34.71	-39.93	-91.02	2.82	-45.26	-53.26	-83.76	-54.55	-20.96	-93.49	18.24	-83.36	-53.55	-28.51	2.76	-62.44	14.23	-37.88	1.59	57.01	78.69	-18.41	-87.64	2.57	-81.27	-31.55	-34	-39.16	2.96	-53.97
BRD-K84595254	strophanthidin	ATPase inhibitor	ATPase inhibitor	ATP1A1, ATP1A2, ATP1A3, ATP1A4, ATP1B1, ATP1B2, ATP1B3, ATP1B4, FXYD2	ATPase inhibitor	1.48	67.25	5.55	-70.24	24.29	-27.22	46.15	-18.79	79.09	-85.38	-21.21	42.46	-6.64	-60.88	43.22	23.46	30.24	-81.28	83.47	20.87	34.39	15.07	-46.2	77.32	-85.64	78.92	34.54	3.66	-29.42	41.62	-4.02	12.58	-26.6	24.67	-11.56	29.92	51.49	61.33	-53.34	49.65	12.81	33.77	30.06	-25.14
BRD-K18678457	ZD-7288	HCN channel blocker		HCN1, HCN2, HCN3, HCN4	HCN channel blocker	0	0	-3.78	-31.7	-2.43	-27.13	-44.8	-19.37	-73.16	-10.88	-49.39	-46.61	-20.31	-45.88	-32.27	-31.18	-60.62	-44.24	-62.88	-55.4	-64.06	-35.86	-16.53	-80.98	-48.09	-49.23	-47.74	-21.01	-38	-58.04	-59.42	-40.45	-18.19	-30.23	2.64	-68.9	-79.79	-37.85	-50.28	-24.69	-13.2	-61.18	-31.55	-63.34
BRD-K80778372	RO-19-4605	GABA benzodiazepine site receptor inverse agonist		GABRA1, GABRA2, GABRA3, GABRA5	GABA benzodiazepine site receptor inverse agonist	-1.09	0.81	1.13	-1.48	22.46	-27.09	-1.27	-1.27	-48.92	-19.46	-35.73	-16.7	-51.53	15.52	-48.34	-21.89	-28.48	1.27	-27.85	-76.16	-31.02	-13.77	-5.5	-42.59	-16.88	-60.67	-71.38	-15.51	3.84	-66.7	8.55	-1.27	-26.75	-9.44	-11.45	-21.72	-15.32	-8.56	-24.28	-52.49	-67.26	-14.32	-38.38	-41.44
BRD-K44849676	capsazepine	TRPV agonist		TRPV1, TRPV4	TRPV agonist	-6.55	-4.33	-4.51	-8.07	3.59	-26.98	76.17	-2.26	-15.87	0	-14.79	1.13	-63.25	-84.03	-35.67	61.86	-10.78	1.3	10.17	2.78	18.78	-41.08	2.61	2.01	-11.91	3.15	-47.09	57.97	-33.05	6.57	-9.43	56.54	-35.7	-31.16	-6.62	-9.1	-25.63	-1.06	-11	-15.13	-52.88	0.81	-25	-9.24
BRD-K53665955	MK-5108	Aurora kinase inhibitor	Aurora kinase inhibitor	AURKA, AURKB, AURKC	Aurora kinase inhibitor	0	-23.65	2.39	0	4.5	-26.9	52.77	16.85	2.2	1.02	-20.4	25.33	51.11	-3.03	-9.6	-35.66	21.33	3.28	-59.43	24.7	-20.08	92.3	-43.82	-62.81	81.44	11.23	16.43	52.63	-53.27	27.24	27.45	1.41	-3.47	20.4	34.23	-43.88	35.6	30.75	-9.42	88.7	44.21	-41.62	15.72	62
BRD-K15164005	apoptosis-activator-II	Carboxylesterase inhibitor		BCHE, CES1	Carboxylesterase inhibitor	-1.62	-45.55	-1.62	-37.65	12.55	-26.82	-6.28	-21.77	-20.21	1.23	-4.62	-45.84	18.76	-17.27	9.71	-64.43	-20.85	-14.84	-83.43	-52.97	-82.08	-15.39	0	-23.93	13.46	-24.89	-76.67	-15.52	-31.99	-27.16	-19.17	-20.73	-7.73	-18.13	0.6	-80.05	-1.23	-23.41	-53.38	7.96	-0.7	-0.42	-21.72	-26.85
BRD-A67373739	AICA-ribonucleotide	AMPK activator		ATIC, PRKAA1	AMPK activator	0	-41.8	-5.74	10.75	0.92	-26.81	-85.77	-4.97	-50.04	-19.58	-59.49	-30.26	-8.39	-8.97	-57.75	-67.9	-88.79	-10.51	-82.42	-81.4	-63.2	-33.1	7.72	-93.13	-23.55	-83.13	-66.11	-63.51	3.97	-81.55	-9.51	-61.29	-25.63	-39.36	0.6	-45.67	-51.66	-65.5	-38.93	-21.65	-59.21	-86.26	-48.7	-83.5
BRD-K08206212	entecavir	Reverse transcriptase inhibitor	Reverse transcriptase inhibitor		Reverse transcriptase inhibitor, DNA replication inhibitor	-5.6	-71.69	-5.85	34.7	0	-26.18	-36.47	-42.81	-24.58	0	-4.73	28.9	53.86	9.87	-20.73	0	-17.46	18.85	-26.44	16.6	24.02	12.26	5.1	-2.87	-40.44	-4.73	-51.09	31.56	-5.74	-3.91	-5.38	-28.11	-24.74	5.79	3.31	22.93	-14.72	-31.24	-4.24	0	-16.66	-55.23	17.51	-22.86
BRD-K36864847	BD-1047	Adrenergic receptor antagonist		SIGMAR1	Adrenergic receptor antagonist	3.49	-18.8	-0.7	-3.52	16.08	-26.13	-1.57	1.94	-6.34	-23.13	-30.48	1.8	-1.9	32.47	28.43	-60.54	-30.58	58.47	-20.6	1.55	1.2	16.64	36.67	-17.92	-48.42	-8.91	45.2	-13.35	24.19	-21.57	15.74	12.46	1.92	14.7	2.04	-16.74	39.43	-9.3	-8.9	6.53	-14.48	12.44	23.39	-25.04
BRD-K51223576	AG-99	Tyrosine kinase inhibitor		EGFR	Tyrosine kinase inhibitor	12.76	-19.21	3.36	-0.7	0	-26.13	31.23	0	-11.42	-26.18	-20.75	-14.48	-12.13	0	9.63	9.68	-9.68	-10.86	-18.44	-16.08	-25.48	30.26	-6.71	-9.52	-13.62	-12.96	-52.74	-33.66	-4.66	-5.51	9.99	-3.45	-66.03	-13.39	-4.69	3.35	-1.06	-59.66	12.53	-12.64	-4.4	-12.96	-13.93	-58.68
BRD-K30867024	SB-216641	Serotonin receptor antagonist	Serotonin receptor antagonist	HTR1B, HTR1D, HTR1A, HTR2A, HTR2B, HTR2C	Serotonin receptor antagonist	8.25	7.07	13.76	-25.28	-12.98	-26.02	-20.59	-18.79	-9.55	1.23	-38.2	-5.17	-5.55	-50.38	-4.05	-25.67	4.43	-20.74	-5.96	-7.58	3.95	-26.8	0.35	-14.18	-21.36	5.12	-30.9	-50.23	21.36	-16.38	-19.64	-21.83	0	-2.36	-18.51	-68.06	-22.34	2.5	4.99	33.85	-6.67	3.14	7.43	-0.39
BRD-A31204924	mitotane	Antineoplastic		CYP11B1, CYP11A1, CYP3A4, ESR1, FDX1	Antineoplastic	-1.3	-16.35	32.87	0.53	-13.66	-25.64	7.46	4.38	11.24	-0.39	-22.28	-4.08	-42.52	-6.63	-13.76	-14.48	-4.3	-3.35	6.41	-42.57	0.53	-7.15	-5.18	-36.24	-8.44	-8.79	-14.68	57.41	3.73	-9.61	-14.25	0.53	-1.84	-10	-23.54	-11.71	8.1	-25.33	6.98	-14.33	-39.92	-18.17	-12.36	3.46
BRD-K10670311	sulfasalazine	Antirheumatic		PTGS1, PTGS2, ACAT1, ALOX5, CHUK, IKBKB, PLA2G1B, PPARG, SLC46A1, SLC7A11, TBXAS1	Antirheumatic, NFkB pathway inhibitor	3.05	11.64	3.77	-6.61	3.59	-25.4	47.36	-17.91	-51.76	-14.32	8.25	7.82	11.35	-25.45	45.46	14.41	-61.97	-24.7	28.96	-18.4	-10.29	-16.7	-7.49	-78.04	-1.2	-76.17	16.49	-15.8	46.4	1.87	14.47	2.04	23.16	-11.97	-1.22	-42.84	35.12	57.92	-25.34	36.28	-21.39	-13.44	19.23	-11.49
BRD-K10573841	tunicamycin	GLCNAC phosphotransferase inhibitor		GNPTAB	GLCNAC phosphotransferase inhibitor	0	74.35	11.98	-7.68	-12.08	-25.4	87.12	46.46	24.29	55.51	37.5	25.87	5.7	-6.64	14.59	47.37	7.94	28.58	87.51	82.81	82.15	44.12	-29.78	63.86	-39.22	57.21	-9.26	81.22	15.33	53.71	9.1	70.7	-48.02	-11.52	3.97	83.37	38.56	30.82	31.47	35.37	18.09	71.44	53.23	32.48
BRD-K48722833	iloperidone	Dopamine receptor antagonist		DRD2, HTR2A, HTR1A, HTR6, HTR7, ADRA1A, ADRA2C, DRD1, DRD3, DRD4, HRH1	Dopamine receptor antagonist, Serotonin receptor antagonist	-3.15	-43.85	-7.72	0	-47.42	-25.24	-83.95	-90.55	-32.76	0	-68.48	-19.61	2.11	-40.91	-38.25	-92.72	-36.1	-2.71	-42.66	-81.66	-26.62	-73.9	-3.88	-40.98	-50.15	-22.19	-63.59	-86.97	-36.14	-52.22	-17.76	-7.3	-42.87	-3.45	-59.92	-85.29	-68.68	-59.06	-90.68	16.06	-54.31	-70.09	-61.39	-86.34
BRD-A90131694	alclometasone	Glucocorticoid receptor agonist	Glucocorticoid receptor agonist	NR3C1, SERPINA6	Glucocorticoid receptor agonist, Immunosuppressant	0.56	-8.03	0.42	-35.95	-29.78	-25.23	-10.5	4.47	-53.59	-48.46	-57.77	-17.62	-31.47	-10.59	-27	-71.36	-26.02	-6.86	-79.38	-53.95	-9.62	-23.22	15.24	-49.45	-20.67	-32.33	-49.82	-7.76	-16.35	-53.15	-15.98	45.72	-14.51	29.32	45.75	12.15	25.78	-28.36	14.96	-16.52	-44.08	-33.09	-13.82	-29.43
BRD-K93325701	damnacanthal	SRC inhibitor			SRC inhibitor	-30.36	-40.4	-0.25	0	34.76	-25.01	-60.15	1.53	13.83	-24.57	14.04	50.35	-37.45	13.29	-20.61	-14.97	-17.67	-19.88	-49.79	-16.59	-19.26	21.71	20.25	-16.97	-22.64	6.93	-23.84	-62.25	-29.68	7.36	19.73	-15.48	7.7	-35.13	2.68	-24.18	21.51	-26.82	-55.48	-53.36	11.64	-7.4	-13.62	-16.69
BRD-A94756469	digoxin	ATPase inhibitor	ATPase inhibitor	ATP1A1, ABCB1, RORC, SLCO1B3	ATPase inhibitor	19.23	55.61	30.96	-70.82	59.02	-24.97	29.33	10.63	25.5	-75.02	3.42	19.46	-36.96	-29.77	8.57	39.63	20.29	-78.8	44.58	-6.17	37.6	1.87	-94.32	24.38	-57.16	62.73	11.4	17.67	-45.25	1.06	-51.64	71.06	-30.22	5.16	-8.42	25.37	18.99	29.46	9.29	-9.44	-5.05	26.32	3.81	-6.79
BRD-K52620403	STO-609	Calmodulin antagonist		CAMKK1, CAMKK2	Calmodulin antagonist	0	-15.65	0	-9.82	10.59	-24.44	-51.59	-10.65	-44.22	-25	-23.25	-54.3	-31.8	-6.49	-70.34	-14.55	-41.31	-7.79	-26.52	-16.52	-24.85	-42.77	7.09	-19.87	-32.87	-77.11	-71.42	-72.86	8.5	-40.9	-65.1	-69.2	-72.55	-13.76	-69.93	-2.18	38.25	-20.79	28.61	-15.37	-42.5	-41.25	0	-35.45
BRD-K53972329	ruxolitinib	JAK inhibitor		JAK1, JAK2, TYK2, JAK3	JAK inhibitor	11.79	-78.13	12.1	-0.67	-0.56	-24.41	-1.09	-8.11	53.73	-17.41	45.06	13.18	1.69	54.94	-2.26	-24.97	4.97	-4.44	18.03	48.19	12.92	37.14	-0.95	10.95	-17.34	-62.39	-23.11	-70.45	12.72	21.44	-2.61	-98.49	-0.95	1.87	62.07	-39.6	-6.63	-40	20.69	15.94	-25.18	47.71	6.8	-30.96
BRD-K57886322	fluocinonide	Glucocorticoid receptor agonist	Glucocorticoid receptor agonist	NR3C1, SERPINA6, SMO	Glucocorticoid receptor agonist	-10.19	-59.24	-19.54	-19.85	-28.62	-24.39	-18.73	-75.78	-87.82	-23.95	-63.04	-25.39	-34.46	-53.8	-86.94	-62.12	-57.2	23.6	-61.37	-44.9	-41.09	-66.48	-40.43	-40.07	-78.87	-63.04	-56.55	-10.25	-52.23	-85.57	-89.81	-19.72	6.17	-21.55	-69.28	-88.29	-41.61	-76.25	0	-57	-78.64	-47.69	0	-41.13
BRD-K37691127	hinokitiol	Tyrosinase inhibitor		TYR	Tyrosinase inhibitor	-2.43	37.35	0	20.81	-6.84	-24.09	80.41	51.49	45.65	56.81	19.43	27.49	1.94	-58.55	-13.12	78.37	84.08	48.41	63.25	77.02	54.76	30.16	76	52.8	11.43	80.18	47.9	51.98	21.88	76.07	-5.79	58.43	16.2	56.2	1.48	72.31	30.92	58.16	39.18	27.74	62.14	40.09	84.64	84.69
BRD-K47659338	EMD-386088	Serotonin receptor agonist	Serotonin receptor agonist	HTR6	Serotonin receptor agonist	38.66	-15.11	0	-0.28	-0.78	-23.74	-21.81	-6.1	-38.3	-19.93	-12.69	-62.77	-40.32	-55.16	-7.23	-75.8	-28.01	-41.61	-25.67	-14.49	-5.63	-87.02	-11.04	-74.53	-4.75	-13.73	-21.75	-46.5	38.62	-53.14	-56.1	-18.58	-15.91	-52.61	-0.97	-43.04	-27.44	-18.64	-16.06	-47.93	-20.77	-8.38	-61.38	-4.74
BRD-K18757346	U-46619	Thromboxane receptor agonist		PTGDR, PTGDR2, PTGER1, PTGER2, PTGER3, PTGER4, PTGFR, PTGIR, TBXA2R	Thromboxane receptor agonist	1.94	-4.33	41.53	17.85	-14.31	-23.57	-37.7	-30.07	-33.96	-23.36	-46.58	-28.53	2.5	-35.37	23.12	-33.37	-81.21	31.13	-77.01	-61.77	-44.65	12.58	-11.77	-38.61	-77.24	-90.14	-51.57	-45.87	-47.09	-56.9	13.77	-48.43	-12.95	-33.12	-1.05	-71.86	-23.86	9.79	-27.2	-10.5	-15.42	-49.02	-48.59	-26.03
BRD-K32795028	1-benzylimidazole	Thromboxane synthase inhibitor		CYP11B1, QPCT	Thromboxane synthase inhibitor	-0.85	-38.05	0	-1.87	-50.87	-23.47	-48.54	-89.55	-86.97	-75.98	-2.92	-3.31	-5.84	-63.38	-88.43	-91.55	-75.93	-74.84	-42.63	-92.65	-49.14	-83.09	-41.05	-91.59	-46.21	-93.06	-72.22	-44.25	-31.74	-85.32	-76.87	-24.18	-33.06	-86.8	-1.09	-70.8	-15.32	-66.65	-18.3	-37.68	-48.51	-88.78	27.69	-84.97
BRD-K80348542	cephaeline	Protein synthesis inhibitor	Protein synthesis inhibitor	RPS2	Protein synthesis inhibitor	0	71.37	0	-91.5	35.02	-23.44	65.2	0	27.92	-86.69	0	58.63	32.8	-12.17	58.48	68.23	26.48	-90.71	66.6	55.23	-45.24	9.47	-96.44	72.92	-54.54	84.48	16.07	94.65	17.93	68.11	0	91.82	-12.03	-20.95	11.29	-14.39	78.19	79.2	50.06	72.15	18.54	75.73	0	13.07
BRD-A22769835	homochlorcyclizine	Antihistamine		HRH1	Antihistamine	-44.88	-10.77	-2.65	7.56	5.18	-23.42	-42.3	0	-43.16	9.04	-27.21	-0.99	-2.1	-8.82	-11.38	-5.82	-33.73	-34.87	-58.79	-35.98	-25.75	-6.38	-42.14	-58.51	-55.62	-44.65	-47.95	-25.82	-20.88	-39.74	-40.39	-19.23	-12.15	-0.35	-3.38	-38.19	-42.34	-15.46	-14.64	-29.86	-28.72	-13.85	-29.04	-12.58
BRD-K53545112	CNQX	Glutamate receptor antagonist		GRIA1, GRIA2, GRIA3, GRIA4	Glutamate receptor antagonist	5.26	-25.33	-4.92	-8.49	-59.8	-23.4	4.71	-43.42	-29.18	-49.33	-9.13	-7.86	-7.21	-37.12	-22.61	-54.01	-52.99	-42.13	-36.46	-24.55	-38.97	-15.13	26.34	-53.34	-33.84	-45.38	-60.66	-75.06	-9.82	-37.95	-18.6	-24.56	-31.63	48.89	5.65	-15.1	-3.42	-22.67	-16.72	-23.89	-22.53	-29.39	58.02	-47.3
BRD-K43887077	dopamine	Dopamine receptor agonist		DRD2, DRD1, DRD3, DRD4, DRD5, DBH, HTR1A, HTR7, SLC6A2, SLC6A3, SLC6A4	Dopamine receptor agonist	-1.44	-36.96	2.82	-1.46	0	-23.23	-21.73	-7.07	-63.54	-24.65	-70.16	29.19	3.65	3.21	-22.3	-7.13	-28.29	37.24	-77.32	-82.58	-43.68	-13.65	-22.52	-51.56	-23.21	-36.42	-92.35	-27.8	-21.01	-46.77	-15.64	-15.26	12.48	-66.21	-0.49	-35.21	17.1	-64.22	-28.31	-17.18	-40.95	-54.16	-48.13	-49.9
BRD-K92778217	mefenamic-acid	Cyclooxygenase inhibitor		PTGS2, PTGS1, KCNQ1, TRPM3	Cyclooxygenase inhibitor	-0.03	-63.66	-0.7	0.49	-2.12	-22.96	-5.72	-12.82	-12.87	-1.48	-62.6	9.46	-9.31	-29.71	-26.86	-16.36	-38.97	-4.47	-15.57	-32.84	-4.63	-10.12	-1.48	-21.58	-24.1	-46.44	-22.3	-16.28	-0.46	-52.53	-35.96	-22.25	-21.81	9.63	18.17	-14.11	2.4	-7.52	-68.24	4.52	-23.44	-54.52	-3.88	-66.3
BRD-A23359898	sibutramine	Serotonin reuptake inhibitor		SLC6A2, SLC6A4, SLC6A3, CYP2B6, CYP2C19, CYP3A5	Serotonin reuptake inhibitor	-1.02	-30.55	-0.7	0.56	-7.12	-22.9	-24.76	-21.41	-36.75	-24.4	-72.39	-80.57	-40.74	-9	-15.41	-37.42	-66.91	-50.28	-26.35	-60.59	-43.91	-13.57	1.37	-64.5	-17.32	-20.11	-22.9	-20.61	-34.29	-68.52	-46.37	-6.75	-6.64	-31.35	-43.6	-39	-30.53	12.16	1.8	-43.55	6.41	-54.4	-20.34	-31.64
BRD-K88701661	dimercaptosuccinic-acid	Chelating agent	HIF activator	DNMT1	Chelating agent	5.89	-15.94	8.49	-11.86	-9.67	-22.88	4.42	12.41	-25.26	10.53	-46.99	26.5	18.68	0	-19.89	27.03	-10.53	20.46	-26.55	44.25	0	13.35	16.64	6.28	-14.53	-6.04	-23.97	-18.74	0	-10.11	0	-3.96	-39.29	29.38	19.85	-3.96	13.46	-12.93	-10.93	-18.94	3.85	0	5.55	-15.73
BRD-K66206289	lobeline	Acetylcholine receptor antagonist		SLC18A2, CHRNA10, CHRNA4, CHRNA9, CHRNB2, OPRM1	Acetylcholine receptor antagonist	0	-59.14	-2.79	14.38	-17.46	-22.83	-31.31	-68.74	-85.9	-30.99	-75.25	9.3	62.71	-27.26	-62.32	-48	-79.96	-30.12	-53.81	-20.91	12.64	2.82	-25.4	-56.09	-78.36	-62.22	-95.96	7.67	1.15	-55.9	-1.8	-25.57	-38.52	24.17	-29.13	-24.33	-75.88	-59.85	-9.8	39.5	-87.25	-94.22	-40.42	-44.17
BRD-A97701745	pindolol	Adrenergic receptor antagonist		ADRB1, ADRB2, HTR1A, HTR1B, HTR2A, HTR2B	Adrenergic receptor antagonist, Serotonin receptor antagonist	0	-31.26	0	-0.74	-2.78	-22.77	-25.55	-43.39	-81.23	-47.7	-95.82	-70.99	-18.79	-9.36	-83.88	-59.04	-89.1	-54.9	-62.25	-96.34	-42.73	-32.84	-0.95	-81.27	-36.03	-77.15	-49.27	-49.23	-23.8	-90.13	-74.92	-42.77	-1.16	-91.16	6.01	-80	-17.89	-41.21	-49.19	-55	-77.3	-67.88	-49.25	-83.79
BRD-K37130656	rivaroxaban	Coagulation inhibitor		F10, CYP2J2, CYP3A5	Coagulation inhibitor	0	-65.38	0	0	-28.62	-22.76	-55.94	0	-47.61	-65.78	-66.09	-31.51	-42.89	4.05	-48.89	-62.09	-82.35	-7.89	-79.34	-77.9	-69.21	-55.51	-10.01	-77.83	-42.62	-89.97	-32.38	-19.71	-16.58	-69.75	-48.25	-30.45	-29.41	-5.37	-24.7	-54.73	-31.79	-80.99	-24.75	-55.82	-71.37	-72.45	-29.17	-86.26
BRD-K63195589	tipifarnib	Farnesyltransferase inhibitor		FNTA, FNTB	Farnesyltransferase inhibitor	0.54	-0.95	-0.95	-2.18	-0.74	-22.67	-25.19	-47.06	-31.51	-56.81	-58.26	-92.53	-63.22	15.67	-83.52	-90.8	-22.21	-29.81	-96.41	-92.35	-44.32	-72.89	-18.76	-94.06	-27.98	-48.3	-18.2	-30.26	-6.97	-95.54	-51.55	-0.7	-31.1	-17.93	-29.8	-61.29	-59.34	-57.24	-42.13	-80.17	-57.48	-44.11	-22.74	-36.67
BRD-K63784565	BRD-K63784565	Topoisomerase inhibitor		TOP1	Topoisomerase inhibitor	0	-9.09	17.32	-52.84	-44.68	-22.65	17.45	12.49	-30.46	7	-54.12	11.58	-32.12	8.61	-27.88	-11.18	-26.84	21.25	-79.92	-17.73	-5.67	10.07	0	-45.16	-42.3	-35.33	-14.95	-46	-22.2	-19.79	-70.3	-52.94	-5.43	-37.41	-15.79	-34.71	-32.35	-38.8	-6.35	15.61	-16.75	-84.5	14.92	-24.71
BRD-A43974499	reboxetine	Adrenergic receptor antagonist		SLC6A2	Adrenergic receptor antagonist	-67.52	-28.2	-21.14	-1.16	15.07	-22.47	10	-1.16	-29.31	-1.62	-42.57	-24.35	-1.94	-25.65	-79.67	-42.75	-23.91	-17.46	-40.22	-21.47	-43.04	-60.23	-11.7	-8.74	-36.62	-37.31	-43.8	-29.34	-1.76	-32.18	-33.21	-32.61	-5.23	4.72	-2.71	-47.47	-35.02	-19.6	-15.79	-9.32	-33.95	-41.04	-19.28	-76.62
BRD-K09635134	l-erythro-MAPP	negative control for D-erythro-MAPP			negative control for D-erythro-MAPP	5	-38.12	-1.62	-21.96	-36.15	-22.45	-29.55	-25.6	-28.75	-59.42	-34.74	-23	-20.75	-24.07	-41.81	-48.07	-47.78	-11.45	-32.51	-41.58	17.12	-24.85	6.68	-16.82	-26.54	-14.92	32.81	-35.23	-25.77	-43.44	-15.79	-44.03	-32.5	10.36	-34.66	13.38	17.72	18.8	31.92	16.41	16.99	14.05	15.6	-14.71
BRD-K28863208	PNU-282987	Cholinergic receptor agonist		CHRNA7	Cholinergic receptor agonist	-1.3	-63.14	-1.9	-6.55	1.78	-22.41	-8.91	1.13	-7.47	4.71	-44.34	-2.15	-1.33	-4.26	-48.32	-28.39	-70.12	-7.99	-30.78	-70.22	-30.1	-36.03	1.67	-45.73	-9.71	-23.9	-22.73	-6.72	26.79	-18.34	2.22	-13.03	-38.37	-83.1	23.49	-34.5	-7.3	-38.67	-36.24	23.65	-16.32	-40.62	-38.85	-51.77
BRD-K14441456	tyrphostin-AG-556	EGFR inhibitor		EGFR	EGFR inhibitor	20.22	11.63	70.99	0	-1.37	-22.39	64.96	2.89	28.46	22.22	28.73	33.73	-49.64	-20.91	13.36	71.05	7.57	27.04	69.28	21.68	59.55	10	0	-4.37	-3.66	20.94	-11.46	26.53	54.17	11.45	12.71	54.07	-37.45	-10.37	-3.14	9.85	15.71	44.57	18.51	19.1	-13.31	30.49	-4.99	15.87
BRD-K30697463	desoximetasone	Glucocorticoid receptor agonist	Glucocorticoid receptor agonist	NR3C1, PLA2G1B	Glucocorticoid receptor agonist	0	-1.69	0	-25.19	-34.92	-22.37	-1.23	1.02	13.06	-30.82	27.67	71.73	-29.86	2.92	8.53	-70.8	-27.53	78.1	-51.76	28.42	-9.06	-76.84	17.64	-48.52	16.98	42.76	-12.2	-45.38	-22.78	-37.07	18.64	-47.32	10	36.74	24.99	51.7	1.23	45.04	19.51	2.92	-1.74	-12.74	88.99	-49.78
BRD-K41260949	valproic-acid	HDAC inhibitor		ABAT, HDAC1, SCN1A, SCN3A, ACADSB, ALDH5A1, HDAC2, HDAC9, OGDH, SCN10A, SCN11A, SCN1B, SCN2A, SCN2B, SCN3B, SCN4A, SCN4B, SCN5A, SCN7A, SCN8A, SCN9A	HDAC inhibitor	-0.11	-97.84	-5.18	46.9	8.77	-22.27	-85.5	-75.34	-95.05	-48.41	-89.46	-95.05	-13.88	-24.89	-89.94	-88.42	-94.84	-61.62	-91.61	-95.55	-85.3	-68.57	0.35	-77.45	-65.61	-98.86	-86.59	-94.84	-41.49	-99.05	-59.93	-70.07	-84.25	-82.42	-10.48	-81.65	-64.04	-91.49	-84.13	-74.22	-89.63	-91.59	-95.38	-92.7
BRD-K53959060	indirubin	CDK inhibitor	Glycogen synthase kinase inhibitor	CDK1, CDK5, CCNE1, CDK2, CDK4, CDK5R1, CDK9, GSK3A, GSK3B, LCK, LRRK1, LRRK2	CDK inhibitor, Glycogen synthase kinase inhibitor, Leucine rich repeat kinase inhibitor, SRC inhibitor, Serum/glucocorticoid regulated kinase inhibitor	10.99	-41.66	23.68	37.23	6.23	-22.26	-21.7	-29.43	-18.37	-16.27	-54.44	-6.53	0	46.08	-24.06	21.57	-82.77	7.08	6.19	-4.65	-3.68	30.28	-83.24	-28.62	-35.2	-66.44	-70.52	11.82	-6.28	2.01	-33.06	-35.69	-70.65	-35.52	-70.81	14.5	39.85	-65.63	-9.23	-67.59	-15	-60.25	3.38	-20.99
BRD-K08502430	angiogenesis-inhibitor	Angiogenesis inhibitor		EGFR	Angiogenesis inhibitor	0	-2.96	21.37	12.52	13.05	-22.2	-7.15	52.27	40.79	40.47	43.02	30.26	53.48	16.59	53.45	79.83	48.32	91.59	92.94	80.76	38.55	51	25.29	88.41	-45.83	10.63	12.03	86.62	-1.83	80.51	-11.25	12.23	41.77	54.99	-38.15	60.47	47.34	-54.78	-15.19	-24.28	54.47	53.06	48.05	32.91
BRD-K59851896	calycanthine	GABA release inhibitor			GABA release inhibitor	-0.92	-10.32	-12.14	15.5	-0.85	-22.07	6.91	5.81	-10.92	-7.39	-30.15	-1.83	-14.6	-16.54	-30.67	-4.65	-0.49	-13.49	-18.53	-52.46	-8.4	-22.01	-20.4	-25.27	-35.27	-21.28	-20.16	-15.45	-1.09	2.98	-35.67	-17.08	-7.83	-36.91	-27.11	-16.84	-0.88	-27.94	-1.3	-18.33	-37.21	-23.54	-23.7	-41.73
BRD-K74141488	naftifine	Fungal squalene epoxidase inhibitor		SQLE	Fungal squalene epoxidase inhibitor	-14.57	-35.37	-66.1	-7.54	-2.71	-21.99	-25.53	-1.23	-6.98	-11.47	-53.68	43.79	10.62	1.13	-28.41	-64.9	-32.64	-37.45	-13.04	-57.79	-49.79	-42.98	24.56	-11.05	-24.27	-21.12	-24.7	-24.26	-16.19	-29.99	-10.3	-36.22	-1.59	-4.66	-32	-10.4	-9.06	-14.91	-44.27	-23.65	-27.66	-25.65	-18.47	-25.95
BRD-A41555725	chlortetracycline	Protein synthesis inhibitor			Protein synthesis inhibitor	-0.88	-35.38	-18.13	-70.25	-1.66	-21.96	-44.6	-13.58	-57.86	-26.09	-18.56	-25.99	19.76	-18.92	-17.36	-73.14	-25.91	3.81	-46.53	-40.52	-13.92	-8.48	2.57	-32.23	-75.85	-40.04	-68.85	-49.46	-16.22	-26.77	-56.85	-41.6	-40.35	-1.66	0	-25.15	4.82	-31.17	-38.06	-39	-44.07	-86.74	-40.44	-56.26
BRD-K34014345	naproxol	Anti-inflammatory		PTGS1, PTGS2	Anti-inflammatory	-13.21	-38.82	-28.17	-32.01	-13.73	-21.94	-56.58	-32.69	-35.49	-30.77	-61.36	7.25	-14.58	-20.44	-46.35	-77.55	-68.92	-4.27	-15.04	-76.97	-22.26	-57.82	-2.22	-84.15	-58.19	-41.58	-35.84	-30.8	-8.32	-64.19	-10.49	9.28	-1.2	-58.56	-14.09	-79.57	5.06	-5.92	-14.96	-24.72	-40	-31.74	-16.14	-45.16
BRD-A75478957	PD-166793	Metalloproteinase inhibitor		MMP13, MMP2, MMP3	Metalloproteinase inhibitor, Collagenase inhibitor	-1.87	-32.29	0	26.89	-17.64	-21.92	-21.61	21.56	-20.44	11.61	-15.17	10.19	-20.55	7.95	31.57	-23.21	-42.98	-1.9	-29.78	-27.01	-1.3	-60.02	11.05	-13.88	-8.25	-39.6	-11.85	-36.26	-12.04	-39.14	-40.68	-8.47	-15.26	4.36	-33.73	-15.98	14.8	-42.13	-16.82	31.36	17.09	-16.83	49.19	12.84
BRD-K00234327	RU-24969	Serotonin receptor agonist		HTR1A, HTR1B, HTR6, HTR1D, HTR2A, HTR2B, HTR2C, HTR5A	Serotonin receptor agonist	0.11	7.06	-0.18	-0.14	4.83	-21.92	19.87	19.82	12.6	9.19	-13.69	1.48	4.79	16.49	0.49	-11.65	68.69	30.26	-6.31	18.79	-1.43	1.44	46.01	-12.38	2.61	4.38	17.28	39.65	18.91	6.45	4.18	5.2	7.32	5.2	-6.42	23.96	5.18	13.75	4.66	89.68	54.96	5.03	48.18	49.81
BRD-K16195444	oxymetazoline	Adrenergic receptor agonist		ADRA1A, ADRA2A, ADRA1B, ADRA1D, ADRA2B, ADRA2C, CYP2C19, HTR1B, HTR1D, HTR2C	Adrenergic receptor agonist	12.43	-46.53	-10.08	-46.85	-59.63	-21.89	32.59	-45.89	65.47	2.56	-31.61	3.43	33.34	22.89	-7.21	-22.05	-27.97	2.75	-13.53	-31.2	13.16	-50.14	3.92	-34.66	3.56	-36.99	20.34	-34.64	23.59	-22.85	15.65	-16.46	-3.37	-13	24.24	-8.66	-14.62	11.42	-2.75	16.04	48.12	-10.74	-26.81	-31.6
BRD-K69763916	LY-341495	Glutamate receptor antagonist		GRM2, GRM3	Glutamate receptor antagonist	0	-66.5	0	-4.46	-19.64	-21.83	-34.35	-53.42	-32.32	-30.45	-34.64	-67.95	-14.08	-57.69	-55.62	-59.62	-73.6	-16.92	-77.46	-76.49	-37.52	-29.5	0.95	-35.62	-28.88	-50.57	-30.4	-88.82	-13.91	-51.4	-37.61	-23.02	-40.43	-19.59	-33.01	-24.35	-13.94	-33.93	-10.25	-18.89	6.08	-27.09	-31.75	-49.95
BRD-A78360835	cercosporin	Photoactivated toxin			Photoactivated toxin	48.1	80.01	74.54	-60.85	0	-21.83	49.83	5.3	42.34	0	18.71	50.29	-12.02	35.42	30.28	87.24	33.2	46.28	91.68	83.35	66.07	64.82	-86.12	87.84	-6.77	28.12	66.55	81.99	-53.51	71.69	11.98	52.76	-30.88	42.4	18.1	64.95	71.15	76.74	36.11	-54.32	34.17	75.5	55.46	14.2
BRD-K92991072	PAC-1	Caspase activator		CASP3	Caspase activator	-7.65	60.02	65.36	-81.83	-39.52	-21.81	81.66	60.37	19.2	22.1	45.32	35.05	35.62	-36.2	-10.21	63.89	52.85	65.3	50.28	74.92	-7.52	6.88	87.52	28.3	31.72	67.93	59.42	93.06	-1.87	75.24	-70.02	81.47	-6.1	75.57	-65.06	80.73	-36.99	74.38	58.01	52.17	69.03	57.75	91.94	74.93
BRD-K39569857	avrainvillamide-analog-3	nucleophosmin inhibitor	Nucleophosmin inhibitor	NPM1	nucleophosmin inhibitor	0	-13.16	-0.25	13.44	38.33	-21.56	-74.76	-0.81	-95.05	-4.26	-90.82	1.17	-7.49	-39.53	-85.08	-94.93	-40.18	-21.29	-14.88	-13.43	-73.78	-30.95	-50.46	-27.86	-7.38	-76.8	-75.62	-10.71	-8.04	-89.83	-34.43	-92.23	-91.26	-90.68	-40.33	-82.03	-6.77	-64.84	-76.8	-79.04	-69.17	-57.66	-43.35	-51.55
BRD-A97479839	piperidolate	Acetylcholine receptor antagonist		CHRM1	Acetylcholine receptor antagonist	0	-57.38	-1.46	9.33	0	-21.47	-11.85	-15.68	-26.38	-13.97	-58.88	-7.87	-1.41	-5.51	-53.72	-0.28	-41.26	-32	-79.9	-36.59	-7.59	-12.07	-7.3	-14.7	-12.52	-32.91	-47.58	-62.46	-6.58	-37.88	-45.02	-4.34	-41.71	-12.99	-8.31	-52.44	-23.22	-77.89	5.73	17.57	-79.6	-45.73	-14.94	-43.1
BRD-K99107520	felbamate	Glutamate receptor antagonist		GRIN2A, GRIN2B, GRIN3A	Glutamate receptor antagonist	1.2	-8.91	0.03	-1.97	15.2	-21.45	-36.83	-1.09	-68.2	-3.67	-7.89	1.48	17.45	13.33	-24.79	-54.23	-63.49	-32.88	-16.87	-41.78	-12.8	-1.48	-2.36	-16.31	-40.76	-85.44	-59.32	-38.94	3.28	-33.76	-7.55	-1.48	-11.87	-20.04	9.47	-51.03	-6.98	-26.3	-54.98	-86.53	-53.72	-40.09	-2.47	-58.47
BRD-A92826379	lupanine	Sodium channel blocker	Sodium channel blocker	INS	Sodium channel blocker	-0.63	-54.57	-0.95	0.53	-7.47	-21.39	-75.92	-72.56	-92.61	-52.3	-35.12	-37.75	0.63	-29.48	-44.57	-57.88	-41.86	-52.87	-56.01	-87.18	-28.03	1.27	-2.18	-73.58	-45.4	-87.88	-35.54	-55.17	-26.88	-66.3	-56.1	-47.06	-6.33	-65.83	-28.32	-32.61	-22.61	-61.11	-56.18	-35.2	-84.76	-39.75	-45.26	-73.87
BRD-K17896185	FIT	Opioid receptor agonist		OPRD1	Opioid receptor agonist	-1.38	-35.52	-11.42	-3.74	-62.6	-21.38	66.61	11.8	8.75	0.99	-27.93	27.66	-35.85	-61.68	-37.11	11.43	23.22	8.79	37.08	13.43	38.15	-12.59	0	22.39	16.06	23.81	51.38	-43.56	-24.85	58.73	33.53	1.52	-9.54	-3.77	0	-11.27	24.27	65.93	34.62	39.71	61.63	40.19	32.5	57.89
BRD-K83963101	MLN-8054	Aurora kinase inhibitor		AURKA	Aurora kinase inhibitor, Mitotic inhibitor, Protein kinase inhibitor	0	-91.37	-0.95	-7.22	-24.3	-21.34	-23.73	-25.34	-43.8	5.43	-4.26	-14.42	4.65	61.16	-11.9	-51.48	-84.76	-24.38	-45.89	-76.54	-16.95	-28.36	3.52	-80.88	-17.13	-91.46	-30.16	-85.98	26.64	-56.78	63.67	4.05	-33.16	10.54	68.73	-44.3	-35.67	-49.75	-21.31	26.16	-60.75	-81.86	-44.8	-69.7
BRD-K00675675	CL-82198	Metalloproteinase inhibitor		MMP13	Metalloproteinase inhibitor	0	-3.42	-2.75	2.11	0	-21.3	-20.18	-41.37	9.98	-45.9	-6.05	11.68	9.99	3.14	-21.14	-40.27	-15.14	2.85	-26.62	-21.78	-71.93	-65.41	-11.02	-33.36	-2.36	-19.57	-26.45	-40.27	-2.5	-15.45	17.52	-17.27	16.29	-15.51	36.39	-12.52	11.59	8.64	-18.74	-24.79	-53.38	-3.77	-37.39	-48.92
BRD-A54029483	IRL-2500	Endothelin receptor antagonist		EDNRB	Endothelin receptor antagonist	-2.57	-84.17	0	4.42	10.25	-21.21	-76.93	-39.06	-49.67	-72.54	-78.73	-15.43	-61.68	-13.42	-57.85	-59.72	-81.3	-75.57	-82.59	-84.77	-49.17	-31.12	-40.6	-73.5	-92.03	-86.69	-88.46	-94.71	-23.39	-92.83	-50.84	-47.91	-63.44	-45.93	-29.77	-71.72	-65.69	-84.48	-73.04	-65.87	-40.4	-70.21	-76.22	-70.06
BRD-K68507560	dicycloverine	Acetylcholine receptor antagonist		CHRM1, CHRM2, CHRM3	Acetylcholine receptor antagonist	0.28	0.1	1.97	-10.67	-1.48	-21.2	6.87	-57.34	-22.45	-8.59	-13.81	7.74	-0.78	-15.17	-21.57	-39.85	-21.59	-4.05	-10.03	-10.19	-13.5	8.12	-18.96	-28.06	-2.26	-5.83	3.02	-3.51	-15.15	-10.31	-20.78	-4.03	1.74	4.7	-9.84	-44.2	-6.9	-30.49	-8.91	-4.18	-5.29	-8.86	12.8	-5.17
BRD-K37516142	idebenone	Calcium channel modulator			Calcium channel modulator	0.35	7.05	2.33	32.33	-4.26	-21.18	-3.21	-1.58	-38.41	-2.73	-53.98	-1.76	-0.26	-0.35	-84.45	-45.35	-44.84	-8.58	-19.46	-39.22	-0.25	-0.49	-8.41	-67.03	-34.21	-63.27	28.43	12.62	50.65	11.23	-18.9	-15.86	-25.04	-18.97	-48.12	3.1	-1.38	-77.81	-62.34	-74.26	-83.69	-46.89	1.94	-18.72
BRD-K57569181	pentoxifylline	Phosphodiesterase inhibitor		TNF, ACHE, ADORA1, ADORA2A, ADRA2B, CHIA, NT5E, PDE4A, PDE4B, PDE5A	Phosphodiesterase inhibitor	0.28	-21.2	0.32	-1.59	1.97	-21.05	2.03	-9.19	-45.18	-0.6	-42.16	-38.27	-37	3.74	-30.31	-60.04	-62.2	-68.79	-35.35	-26.49	-30.78	-33.74	-10.91	-60.05	-21.87	-71.31	-43.34	-6.89	1.02	-40.28	9.78	6.99	-15	-66.28	-12.4	-34.83	-13.66	-45.56	-30.58	6.66	-66.74	-61.66	-79.03	-67.44
BRD-A16665823	butoconazole	Bacterial cell wall synthesis inhibitor			Bacterial cell wall synthesis inhibitor	0	13.8	0	-4.44	-6.73	-20.99	-23.59	-36.58	9.71	51.33	-33.68	-1.34	41.86	3.56	-55.78	-14.76	-23.65	28.81	20.26	-23.05	15.1	42.26	-15.01	9.59	-27.82	1.27	-4.21	12.03	16.93	-11.97	-19.64	25.32	-17.36	-21.6	-2.08	-1.9	-23.66	-3.88	16.86	-2.43	6.77	-12.06	-38.96	-6.96
BRD-K92678294	irilin-a	Isoflavone			Isoflavone	-5.81	-17.9	-1.92	73.21	-2.22	-20.85	-14.33	1.16	-30.92	9.82	-19.89	36.56	17.15	14.88	-27.44	-4.94	-17.48	13.03	-36.16	-19.42	-42.17	-48.31	11.21	13.14	-56.21	-30.26	-15.06	8.13	-1.13	-29.85	36.94	-1.8	1.67	-21.74	16.43	-10.1	-4.89	-23.04	14.5	-7.04	-35.14	-42.37	1.16	-9.02
BRD-K62363391	dapsone	Bacterial antifolate	Dihydrofolate reductase inhibitor	DHFR	Bacterial antifolate	0	-80.47	-9.48	-18.9	-2.89	-20.68	-34.49	-73.58	-70.46	-71.91	-70.96	-60.59	-17.57	-61.15	-42.98	-24.87	-41.8	-10.34	-51.56	-72	-84.14	-51.94	22.03	-72.11	-90.97	-63.59	-93.24	-23.71	-64.11	-71.82	-79.16	-61.99	-66.73	-24.63	-76.16	-71.29	-63.67	-66.24	-74.93	-4.72	-54.68	-86.5	-71.36	-75.15
BRD-K85603128	resorcinol	Phosphodiesterase inhibitor		CA12, CA14, CA2, PTGS1	Phosphodiesterase inhibitor	0	-37.86	0.39	2.19	-21.19	-20.54	-57.35	-38.15	-62.95	-39.77	-75.4	32.11	-23.41	-64.65	-27.46	-40.37	-65.85	-31.06	-26.9	-57.02	-28.94	-42.5	-28.83	-53.48	-51.04	-55.49	-21.46	-11.58	-22.98	-49.21	-81.01	-30.26	-15.79	-68.89	-32.59	-40.91	-37.51	-47.22	-52.82	-64	-31.28	-47.52	-42.66	-49.01
BRD-K63150726	JTE-907	Cannabinoid receptor inverse agonist	Cannabinoid receptor agonist	CNR2	Cannabinoid receptor inverse agonist	-0.49	-4.65	18.69	-3.14	-9.28	-20.5	0.74	-39.26	-5.97	-1.06	-17.51	9.29	-77.4	-12.08	-59.74	-0.88	-7.94	-0.7	-1.44	-22.74	25.75	-9.11	1.02	-61.34	-19.32	-3.49	-37.33	-8.3	14.16	-7.5	-21	-14.46	-38.16	-24.1	-0.88	-0.92	28.39	-35.43	-6.17	-0.67	-25.43	0.7	-47.95	-5.5
BRD-A98283014	calmidazolium	Calcium channel blocker		ATP2B1, PDE1A	Calcium channel blocker, Calmodulin antagonist	36.4	18.65	1.34	-46	-22.15	-20.39	78.45	81.11	57.55	0.85	9.81	81.65	78.09	-47.24	42.78	13	81.5	-20.63	56.94	62.06	18.11	35.74	-24	78.15	-57.89	84.38	23.78	33.4	19.42	73.92	82.31	82.24	-23.3	23.37	75.94	40.77	50.99	63.26	57.11	76.32	76.29	82.91	71.28	53.03
BRD-K92726801	hydrastinine	Haemostatic agent			Haemostatic agent	-2.01	-2.12	-28.82	0	1.83	-20.32	-29.62	-71.36	-26.85	-3.21	-58.45	-31.23	-62.31	6.34	-41.49	-69.44	-42.27	-36.58	-71.08	-84.73	-46.87	-51.81	-15.2	-28.67	-48.77	-44.9	-77.2	-65.75	-1.66	-40.42	-52.46	8.23	-28.78	-58.54	-43.32	-28.32	-41.53	-42.85	-12.37	-61.99	-69.56	-74.42	-78.61	-73.79
BRD-K48367671	febuxostat	Xanthine oxidase inhibitor		XDH	Xanthine oxidase inhibitor	0	0.42	-1.55	0	-4.9	-20.3	-47.3	0.48	-18.71	-7.68	7.64	-16.15	-18.44	-20.55	-9.7	-31.92	-21.81	-16.09	-33.4	-22.07	-15.16	-3.49	-6.5	-20.28	-15.76	-19.44	-22.47	-15.19	-33.46	-21.05	-27.35	-18.17	-4.21	5.51	-9.13	-49.12	-15.3	-15.72	-20.94	31.84	-20.74	-15.19	4.93	-16.56
BRD-K57011718	UK-356618	Metalloproteinase inhibitor		MMP3, MMP13, MMP14, MMP2, MMP9	Metalloproteinase inhibitor	-0.74	2.11	-1.48	-31.85	-71.97	-20.26	25.81	0	43.61	26.93	14.77	-9.85	66.43	16.86	-22.67	-17.5	69.34	52.28	3.91	-10.4	1.13	7.08	94.98	-8.87	5.89	0.81	24.37	70.47	-32.53	-3.35	-39.47	2.46	0.7	43.7	-73.58	34.11	-14.88	5.14	-14.32	-43.52	20.59	34.33	84.03	20.85
BRD-A88774919	doxycycline	Bacterial 30S ribosomal subunit inhibitor	Bacterial 30S ribosomal subunit inhibitor	MMP8, MMP1	Bacterial 30S ribosomal subunit inhibitor, Metalloproteinase inhibitor	10.55	48.46	96.93	0	37.37	-20.21	-30.43	-60.49	-69.05	-5.57	-75.19	-38.26	-17.17	37.3	-39.43	-45.81	-70.32	44.56	-32.42	-82.38	-68.07	-38.95	-12.53	-63.57	25.86	-44.05	-68.07	-11.28	58.13	-58.31	-23.98	-15.42	66	-30.25	-10.3	23.91	30.48	-35.17	37.31	7.5	32.04	-38.93	-13.91	-33.16
BRD-K51290057	SA-792709	Retinoid receptor agonist		RARA, RARB	Retinoid receptor agonist	0	25.97	0	78.25	-71.2	-20.21	79.4	29.02	43.97	75.56	69.94	58.52	47.15	19.35	55.77	85.69	30.04	89.98	46.1	11.77	64.04	26.07	75.45	58.1	42.89	68.17	2.4	7.13	-16.82	59.52	27.55	55.55	0	26.75	48.84	18.27	53.24	28.71	5.46	-41.97	39.44	51.28	4.33	23.39
BRD-K39339537	epirizole	Cyclooxygenase inhibitor		PTGS1, PTGS2	Cyclooxygenase inhibitor	0.67	-1.9	0.28	-3.08	-5.99	-20.17	-14.88	-10.9	-12.15	-1.44	-17.64	-0.78	-1.09	-2.15	-6.14	-18.35	-1.01	0.95	-6.33	-9.6	-19.36	-3.59	8.61	-15.12	-20.48	-5.6	-13.04	-14.42	2.22	-0.49	-23.02	-8.74	-1.51	3.84	-16.81	3.45	6.5	-8.84	1.35	-3.59	-4.09	-6.44	5.99	-21.11
BRD-K57930253	nitrazepam	Benzodiazepine receptor agonist	Benzodiazepine receptor agonist	GABRA1, GABRA2, GABRA3, GABRA4, GABRA5, GABRA6, GABRB1, GABRB2, GABRB3, GABRD, GABRE, GABRG1, GABRG2, GABRG3, GABRP, GABRQ, GABRR1, GABRR2, GABRR3, SCN1A	Benzodiazepine receptor agonist	3.28	-32.22	0.9	-20.56	4.68	-19.95	-69.79	-30.82	-40.98	-15.23	-79.55	-46.48	-44.18	-60.13	-43.63	-31.81	-73.23	-68.93	-72.35	-67.43	47.48	-42.76	-86.24	-88.15	-38.95	-93.87	-80.33	-10.11	32.61	-92.22	-30.96	-16.4	-44.14	-83.23	-19.51	-78.5	-54.35	-70.55	-68.85	-14.99	-68.09	-82.06	-10.1	-77.08
BRD-A73741725	exemestane	Aromatase inhibitor	Aromatase inhibitor	CYP19A1	Aromatase inhibitor	-4.39	-30.97	-7.15	9.12	11.77	-19.95	-5.91	-11.15	-2.71	0	-29.05	18.33	-57.94	-51.41	-10.26	64.85	-30.73	0	-21.34	-9.49	-49.18	-37.02	7.86	23.12	-42.65	-14.31	-21.22	-19.58	-73.71	-8.38	-2.38	5.64	-37.15	-38.6	-2.75	-12.55	3.86	-14.91	-19.12	-75.03	-7.56	-8.87	-17.63	-40.44
BRD-K55468218	spiperone	Dopamine receptor antagonist		ADRA1A, DRD2, DRD3, DRD4, HTR1A, HTR2A, HTR7, ADRA1B, ADRA1D, DRD1, DRD5, HTR1D, HTR2B, HTR2C, HTR6	Dopamine receptor antagonist	0	-15.02	-0.28	-0.25	7.28	-19.84	-57.34	-1.75	-64.73	18.78	-20.02	32.42	-13.96	-17.88	-16.66	5	-51.24	10.09	18.85	-25.01	33.94	-15.04	6.31	-25.02	-29	-32.77	-69.34	-4.85	12.12	23.4	-27.94	-2.45	-39.56	-10.98	-22.22	-32.19	-14.34	19.2	-19.3	-39.61	-38.73	-35.19	-37.05	-49.8
BRD-K72783841	tyrphostin-AG-555	EGFR inhibitor		CDK2, EGFR	EGFR inhibitor	0	-3.31	-2.92	27.51	1.48	-19.83	56.11	12.28	2.75	16.98	-1.76	31.33	1.02	-5.17	-1.99	20.25	19.81	7.98	22.14	31.25	52.23	-3.18	1.23	3.36	0.99	11.65	4.76	-0.95	21.74	4.83	3.83	20.55	-32.22	3.06	3.17	31.45	3.5	2.22	15.29	20.71	19.06	40.74	-7.99	3.21
BRD-K60770992	pergolide	Dopamine receptor agonist		DRD1, DRD2, ADRA2A, ADRA2B, ADRA2C, DRD3, DRD4, DRD5, HTR1A, HTR1B, HTR1D, HTR2A, HTR2B, HTR2C, ADRA1A, ADRA1B, ADRA1D, KCNA5	Dopamine receptor agonist	0	-26.68	0	-5.21	-14.61	-19.8	-23.04	-49.1	-53.11	-3.14	-49.76	-12.88	-20.71	4.26	-15.32	-29.3	-44.17	-16.99	-26.74	-39.04	-89	-72.76	2.5	-73.19	-47.67	-26.64	-85.96	-48.98	-20.79	-65.76	-14.62	-7.76	-7.73	-43.68	-23.21	-6.45	6.45	-34.37	-4.93	-11.23	-27.12	-23.12	-66.9	-57.38
BRD-K99749624	linifanib	PDGFR receptor inhibitor		CSF1R, KDR, PDGFRB, FLT1, FLT3, FLT4, CSF1, KIT, PDGFRA, RET, TEK	PDGFR receptor inhibitor, VEGFR inhibitor	1.23	3.38	-1.11	0	-79.24	-19.78	67.04	2.29	66.82	0	87.84	71.61	0	28.26	96.43	95.73	5.36	81.34	93.36	41.58	74.59	81.73	5.36	21.92	16.95	9.99	97.18	3.66	-58.93	4.88	-55.09	3.24	31.69	63.25	2.11	62.37	6.06	32.24	3.49	6.77	91.25	5.14	69.93	0
BRD-K26801045	pipamperone	Dopamine receptor antagonist	Dopamine receptor antagonist	DRD2, HTR2A, HRH1, HTR1A, HTR1B, HTR1D	Dopamine receptor antagonist	0.49	51.16	0.87	-6.56	-2.65	-19.71	51.9	20.04	38.33	57	55.12	68.09	33.4	24.51	55.9	-13.97	41.43	75.78	-58.56	62.52	-23.97	-13	73.93	20.62	41	70.48	33.92	16.47	30.03	22.15	-48.84	-75.55	29.01	82.62	57.56	83.76	-55.2	42.24	27.7	47.96	75.15	37.88	68.98	46.62
BRD-K49671696	ketanserin	Serotonin receptor antagonist		HTR2A, HTR2C, ADRA1A, ADRA1B, ADRA1D, DRD1, DRD5, HTR1A, HTR1B, HTR1D, HTR2B, HTR5A, HTR7, SLC18A1, SLC18A2	Serotonin receptor antagonist	0.63	2.75	6.5	-16.56	-8.99	-19.64	-24.5	-16.56	-14	-3	-22.61	25.5	2.26	24.65	-27	-48.67	-45.01	-37.5	-42.28	-42.12	-57.12	-4.69	40.39	-33.98	-43.91	-77.22	-35.04	-42.37	33.42	-27.93	20.08	-9.85	-16.41	25.99	2.15	36.43	-8.17	-36.83	-31.38	5.6	72.64	44.36	9.72	-78.26
BRD-A20239487	atenolol	Adrenergic receptor antagonist		ADRB1, ADRB2	Adrenergic receptor antagonist	-6.82	-42.04	-68.33	0	-22.86	-19.39	-6.96	-13.82	0	8.84	-15.95	-3.82	80.72	-9.51	20.29	20.87	0	25.61	-5.35	32.15	-22.99	17.34	-3.31	3.84	4.5	0	6.24	-9.27	0	-6.91	3	-4.37	0	4.4	25.23	40	0	-8.99	0	27.02	4.5	-51.63	-15.31	-29.31
BRD-K74195153	irsogladine	Phosphodiesterase inhibitor		PDE4A	Phosphodiesterase inhibitor	1.6	-23.3	4.39	5.23	-6.47	-19.35	-27.03	17.58	-17.16	1.73	-63.72	15.03	-1.28	-16.91	-59.37	-31.1	-42.09	43.15	-40.41	-66.23	-23.39	21.59	-21.24	-43.55	-49.75	-78.68	-25.36	13.36	26.15	-52.77	-41.42	-13.57	25.41	-53.8	3.45	-17.76	-4.69	-24.97	18.69	6.24	-24.67	-21.42	-52.89	-18.1
BRD-A52326238	isogedunin	HSP inhibitor			HSP inhibitor	-8.48	-16.11	-7.35	-9.31	0	-19.27	-31.95	-5.55	-44.37	-0.78	-28.25	-20.46	-14.75	13.21	-2.15	2.45	-43.71	-6.52	-70.7	-12.2	-15.42	-68.25	-8.48	-7.62	-53.72	-20.07	-52.08	-13.48	-17.45	-10.84	-17.73	-1.69	-14.99	-24.25	-1.44	-30.13	-23.6	-16.78	-19.84	-13.46	-47.57	-77.23	-39.12	-14.38
BRD-K82746043	navitoclax	BCL inhibitor		BCL2, BCL2L1, BCL2L2	BCL inhibitor	-28.25	-87.77	-39.85	1.34	5.74	-19.24	-90.32	-58.81	-71.61	-48.19	-62.42	-43.12	-1.17	-1.23	-51.46	-85.34	-35.38	-50.14	-74.94	-94.65	-24.53	-40.04	14.56	-30.45	-42.97	-72.73	-49.26	-74.76	-24.46	-78.05	-25.77	-52.58	-0.74	-20.64	8.57	-80.31	-30.86	-64.32	-60.94	-28.22	-70.34	-85.54	-57.6	-63.23
BRD-K95402279	geranylgeraniol	Farnesyltransferase inhibitor			Farnesyltransferase inhibitor	0	-68.52	0	11.11	0	-19.21	-87.77	-52.02	-83.94	-58.83	-68.42	-87.39	4.79	-49.5	-52.58	-74.56	-91.81	-33.96	-93.35	-94.23	-67.24	-67.54	6.17	-92.04	-81.05	-82.78	-63.26	-86.56	-25.53	-95.74	-28.36	-68.79	3.98	-61.88	42.34	-32.97	-39.97	-97.64	-66.63	-39.78	-78.93	-81.59	-45.34	-87.72
BRD-K81209512	AG-494	EGFR inhibitor		EGFR	EGFR inhibitor, Tyrosine kinase inhibitor	-1.13	2.98	-4.79	-9.62	0.84	-19.15	2.5	-3.95	-14.95	-3.38	-11.14	3.03	-17.61	-68.36	-50.23	10.45	-12.85	2.15	6.42	-12.56	5.55	-9.23	-4.07	-45.71	-0.53	-0.67	-29.32	1.98	-4.6	8.65	-33.14	44.69	-36.36	-3.18	-7.16	-11.76	-19.2	0.98	2.15	-28.4	-13.68	-8.93	-18.88	-36.55
BRD-K08973992	linoleic-acid	Oxidative stress inducer		FABP4, FFAR1, FFAR4, HNF4A, KCNB1, PPARG, TRPM8	Oxidative stress inducer	-0.7	-19.8	-30.3	-13.95	68.06	-19.14	-6.48	-3.74	-15.14	-1.26	-10.85	6.38	-16.06	-2.21	15.48	-24.87	1.93	-46.3	-3.96	-22.58	-14.14	19.44	9.51	-34.09	-27.46	-25.85	-16.3	-3.79	-15.19	-7.33	-27.68	-13.98	-21.11	8.95	0	7.02	-7.91	-5.15	-24.86	29.2	-7.8	7.94	3.9	-31.71
BRD-K67013324	luzindole	Melatonin receptor antagonist		MTNR1B, MTNR1A	Melatonin receptor antagonist	0	-44	-2.15	-22.19	-7.43	-19.06	-23.9	-12.17	-30.66	-3.31	-48.16	-44.17	1.48	-65	-56.08	-42.32	-37.5	-2.78	-43.54	-91.55	-76.55	-53.49	-34.55	-85.49	-51.76	-39.6	-73.04	-47.16	12.3	-70.9	-54.3	-28.94	-10.37	-20.9	-12.04	-46.91	-56.12	-31.08	-38.91	-55.79	-74.16	-67.23	-59.83	-57.83
BRD-A09094913	strychnine	Acetylcholine receptor antagonist		GLRA1, CHRM1, CHRM2, CHRM3, CHRM4, CHRM5, CHRNA10, CHRNA9, GLRA2, GLRA3, GLRB	Acetylcholine receptor antagonist	-0.32	-53.17	-5.71	29.13	-13.29	-18.91	-23.78	-17.25	-34.07	5.88	-36.19	20.95	0.56	9.13	-40.05	-57.97	14.34	-4	-7.19	-18.1	0.42	-17.97	3.14	15.04	-30.92	-16.49	-20.67	-80.02	3.91	-24.42	-40.86	-56.61	-2.81	51.63	-6.6	10.37	-4.9	2.54	-3.45	-3.1	-18.57	-45.09	7.25	-15.38
BRD-K63089472	farnesylthioacetic-acid	Inhibitor of methyl esterification of farnesylated proteins			Inhibitor of methyl esterification of farnesylated proteins	-1.52	-45.29	-9.12	1.66	2.75	-18.83	-61.91	-37.52	-92.85	-56.6	-69.1	-47.75	-36.21	-41.71	-59.9	-62.17	-66.15	-72.88	-28.61	-67.49	-32.91	-45.37	-74.02	-77.79	-2.75	-88.19	-53.81	-36.7	-77.6	-90.6	-65.87	-24.35	-10.28	-89.03	-38.66	-82.66	-66.78	-37.33	-62.98	-70.18	-70.58	-65.31	-76.89	-68.97
BRD-K81916719	triclabendazole	Microtubule inhibitor		DNMT1	Microtubule inhibitor	-3.95	-84.33	6.97	0.78	-13	-18.78	-34.29	-59.7	-47.84	-16.12	-3.95	10.43	2.61	-81.87	27.68	-35	-3.06	-54.12	21.23	-50.93	50.96	63.91	11.69	-38.62	0.55	-79.96	-8.53	-50.73	77.02	-68.9	-13.72	-58.89	-26.72	-1.54	-3.7	16.95	-17.94	2.36	-18.62	-48.08	-44.27	-66.59	-9.56	-34.36
BRD-K52721684	PCO-400	Potassium channel activator	Potassium channel activator	ABCC9, KCNJ8	Potassium channel activator	0	7.23	4.48	-16.47	-82.86	-18.63	-16.09	-25.26	-7.96	-25.39	-15.92	-4.23	0	13.86	-8.94	-41.73	18.94	62.01	-12.76	-1.76	0.91	5.17	15.77	-10.8	-15.61	-12.6	-15.76	-29.39	10.38	-16.6	-36.24	-16.85	-1.98	32.32	-5	7.54	11.11	4.15	-11.69	14.01	-6.9	-34.9	51.25	-6.87
BRD-A18620900	estriol	Estrogen receptor agonist	Estrogen receptor agonist	ESR1, ESR2	Estrogen receptor agonist	0	-26.33	0	13.83	1.55	-18.56	3.14	2.15	-30.48	-39.8	-44.21	-25.3	-52.6	38.69	-14.81	-75.19	-38.21	-20.89	-44.95	-57.24	2.54	-21.64	-5.96	-20.93	-53.52	-72.35	15.95	-7.23	6.1	-58.4	14.66	-34.71	-29.87	-24.88	50.07	-35.35	-53.94	-31.28	-71.87	-1.13	-74.4	-30.95	-71.62	-64.88
BRD-K76805682	SB-415286	Glycogen synthase kinase inhibitor	Glycogen synthase kinase inhibitor	GSK3B, GSK3A, RPS6KB1	Glycogen synthase kinase inhibitor	-1.04	-83.76	0	96.57	-59.16	-18.47	1.66	21.26	-11.49	18.52	32.77	-2.36	17.31	9.89	-26.73	56.07	-50.13	59.92	16.78	68.13	-18.87	1.48	-81.73	64.82	-12.95	-19.45	16.2	45.59	-25	75.52	34.46	9.93	34.19	43.12	-7.37	31.31	45.47	-13	1.06	-25.76	21.09	30.61	39.8	-41.95
BRD-K32536677	AGK-2	SIRT inhibitor		SIRT2	SIRT inhibitor	-23.14	-51.21	-1.58	51.76	68.63	-18.47	-77.62	-37.2	-72.84	47.03	-58.84	-11.09	6.8	48.81	-14.45	-64.13	7.36	12.62	-30.71	-35.72	-30.67	-0.74	60.63	-16.54	-15.43	-68.08	-0.93	-72.48	-0.78	-44.06	-11.91	-36.68	0.6	30.98	0.35	6.63	-26.22	-32.75	-57.15	16.78	-41.19	-72.74	-5.1	-26.24
BRD-K24656285	farnesol	FXR agonist		MAOB, MVK, NR1H4	FXR agonist, Monoamine oxidase inhibitor, NFkB pathway activator, PPAR receptor agonist	0	-78.49	0	-17.89	3.36	-18.44	-53.46	-32.2	-68.89	-29.54	-62	-25.29	-24.86	-29.48	-34.57	-23.97	-78.54	-53.64	-75.51	-74.95	-65.58	-32.84	-49.57	-72.34	-30.67	-85.88	-48.56	-55.8	-32.64	-84.85	-48.8	-9.55	38.76	-24.87	26.21	-47.22	-56.59	-95.02	-89.75	-54.74	-63.44	-55.02	-44.51	-86.87
BRD-A30815329	felodipine	Calcium channel blocker		CACNA1C, CACNA1D, CACNA1H, CACNA1S, CACNA2D1, CACNA2D2, CACNB2, CALM1, CFTR, NR3C2, PDE1A, PDE1B, TNNC1, TNNC2	Calcium channel blocker	-0.14	-36.42	-1.51	-0.74	19.04	-18.38	-47.12	-14.59	-36.56	-34.56	-46.47	-39.58	-4.05	-47.66	-18.58	-45.33	-45.13	-36.61	-25.75	-65.04	-27.21	-50.17	-20.43	-76.47	-67.63	-25.53	-62.27	-15.36	-2.85	-66.02	-1.98	-2.15	-10.38	-45.82	-42.3	-33.61	-20.51	-58.81	-36.58	-83.36	-24.01	-40.11	-85.95	-51.56
BRD-K04046242	equilin	Estrogen receptor agonist	Estrogen receptor agonist	HSD17B1	Estrogen receptor agonist	-6.62	-10.91	-11.79	43.8	-0.46	-18.37	-9.65	-0.46	-13.44	-9.78	-4.73	6.8	-0.42	-0.5	-59.37	-36.17	-43.79	-57.8	-25.56	-29.11	-2.04	-4.63	-0.39	-23.14	-10.89	-29.02	-14.46	-23.53	-13.29	-4.19	2.7	-0.06	-0.46	-4.78	-0.67	-14.97	-0.35	-27.43	-17.66	-30.75	-52.74	-16.14	-54.34	-9.49
BRD-K80725821	RS-16566	Serotonin receptor antagonist			Serotonin receptor antagonist	-0.88	-42.61	0	-9.95	-1.74	-18.35	-23.75	-73.47	-52.46	-50.07	-45.12	-48.99	-66.14	-56.4	-24.54	-44.7	-69.09	-72.23	-39.04	-32.74	-76.33	-57.4	-47.72	-34.78	-71.57	-54.15	-45.87	-40.35	-18.82	-69.62	-33.45	-55.66	-34.34	-25.33	-15.25	-52.3	-32.68	-25.69	-67.22	-7.63	-33.64	-69.03	-62.24	-69.13
BRD-A26095496	clobetasol	Glucocorticoid receptor agonist	Glucocorticoid receptor agonist	NR3C1, PLA2G1B	Glucocorticoid receptor agonist	-6.58	-11.64	-1.13	-24.61	-78.08	-18.13	-12.47	1.44	-6.29	-30.13	2.33	-15.56	-0.6	-31.07	-54.03	-54.7	-26.83	9.36	25.89	24.78	-8.91	-13.95	-11.58	-39.79	-12.37	13.74	-19.69	-9.39	-30.33	17.65	-24.25	-7.44	-59.13	33.74	-30.4	-9.87	23.91	5.43	34.79	-12.46	9.97	11.48	15.48	10.19
BRD-A28856712	tetryzoline	Adrenergic receptor agonist			Adrenergic receptor agonist	-4.65	-53.02	-8.53	0.88	2.45	-18.05	-45.56	-0.88	-56.23	22.8	-67.18	42.93	-23.84	-2.04	-0.85	-16.63	-2.96	9.02	-24.84	-31.02	3.63	15.8	3.47	-17.95	-55.41	-54.11	-42.14	-35.47	-9.42	-36.74	11.36	-0.35	5.5	-4.54	21.88	-72.97	-21.89	-30.85	4.55	-16.51	-19.19	-29.68	-0.85	-18.94
BRD-K16508793	diazepam	Benzodiazepine receptor agonist		GABRA1, GABRA2, GABRA3, GABRA5, ADRA1A, CYP2C19, GABRA4, GABRA6, GABRB1, GABRB2, GABRB3, GABRD, GABRE, GABRG1, GABRG2, GABRG3, GABRP, GABRQ, GABRR1, GABRR2, GABRR3, TSPO	Benzodiazepine receptor agonist	0.53	16.53	22.06	-2.15	-0.63	-18.04	6.56	-4.97	5.88	-30.49	-14.16	-22.31	-5.37	-13.63	0.28	-34.37	33.71	70.68	-33.25	-1.87	-73.88	-59.01	8.63	-9	0	-3.88	38.93	-29.73	24.02	-2.26	-17.58	-15.76	58.86	-6.24	8.64	-2.75	2.75	-14.26	-6.21	20.37	12.26	-5.39	24.44	7.42
BRD-U01690642	acetyl-geranyl-cysteine	Isoprenylated protein methylation inhibitor			Isoprenylated protein methylation inhibitor	0	-48.04	-2.5	-9.9	-15.82	-17.94	-12.75	-3.65	-28.67	-4.74	-49.87	-27.75	-7.68	-3.41	-70.56	-48.3	-45.97	-35.33	-35.69	-37.53	29.26	-29.85	-49.63	-52.71	-3.69	-62.81	-27.68	-22.23	15.61	-40.58	-34.64	25.96	-4.12	-43.22	-17.3	-30.62	5.74	-13.25	-15.13	45.77	-57.78	-65.71	-3.77	-48.18
BRD-K08703257	3-amino-benzamide	PARP inhibitor		PARP1	PARP inhibitor	-0.81	-92.58	-7.11	1.06	21.78	-17.86	-61.45	-55.18	-78.76	-66.03	-98.21	-41.98	-5.43	-28.63	-84.54	-67.02	-62.08	-81.67	-90.64	-91.64	-64.4	-54.39	-12.38	-96.57	-38.17	-98.56	-69.26	-69.67	-27.18	-98.7	-20.3	-64.06	-45.33	-89.09	-20.06	-58.2	-77.5	-77.98	-77.52	-49.09	-88.65	-97.38	-73.37	-94.78
BRD-K25504083	cytochalasin-d	Actin polymerization inhibitor		ACTB	Actin polymerization inhibitor	0	50.11	-2.67	-87.48	0	-17.65	3.82	-35.36	5.19	-5.17	37.65	-14.64	27.19	-55.41	-6.25	14.75	48.37	-74.65	17.11	48.23	13.35	0	-63.38	65.59	-8.17	82.57	26.87	20.5	-59.11	29.02	-85.84	28.99	-51.02	-20.85	-2.68	-67.16	-76.85	75.7	39.18	38	43.74	65.66	0	80.89
BRD-K43978949	PIT	Purinergic receptor antagonist		P2RY1	Purinergic receptor antagonist	-23.61	-63.18	-49.93	-17.19	-22.23	-17.64	-15.98	-22.11	-81.22	-68.9	-78.59	-24.88	-17.64	-23.44	-17.13	-48.43	-48.72	-11.35	-31.77	-57.09	-2.22	-42.62	-29.63	-62.78	-79.5	-38.74	-47.07	-61.47	-47.77	-28.13	-47.35	-3.51	-19.14	-44.01	-5.78	-34.83	-3.18	-61.46	-72.12	-33.91	-51.1	-43.06	-50	-56.56
BRD-A20126139	medrysone	Glucocorticoid receptor agonist	Glucocorticoid receptor agonist	NR3C1	Glucocorticoid receptor agonist	-1.83	42.89	2.92	-68.02	-27.98	-17.6	21.74	-12.09	-37.36	-36.89	-15.3	24.26	-39.2	7.67	17.32	34.29	46.33	47.05	-1.94	57.83	58.03	-39.97	-55.2	49.04	9.45	25.93	24.86	52.77	-35.95	61.08	-23.2	13.72	46.48	54.1	-25.72	28.17	45.44	9.97	17.57	-41.31	49.53	54.67	70.2	44.06
BRD-K53913732	SB-408124	Orexin receptor antagonist		HCRTR1, HCRTR2	Orexin receptor antagonist	2.54	4.97	1.37	1.37	-1.66	-17.52	-7.39	46.37	-15.02	14.24	-4.92	5.6	10.3	8.8	2.82	0	11.86	55.01	0	24.33	2.04	1.94	-38.31	9.63	-28.21	-10.23	-26.59	7.47	2.47	-7.59	16.24	2.29	11.73	4.59	-1.97	-33.05	-17.88	-20.46	15.66	-1.23	7.31	43.17	57.28	18.04
BRD-K43880410	pregnenolone	glutamate receptor modulator		CYP17A1, PGR, SULT2B1	glutamate receptor modulator	2.74	-64	55.56	2.78	-1.3	-17.51	13.91	1.39	-41.44	1.34	-68.58	-9.51	-11.95	-27.7	-39.45	-65.9	-20.34	42.15	-43.47	-2.75	-2.52	-45.88	53.44	-45.84	-49.48	-49.05	-89.9	-15.5	-27.21	-51.91	-57.3	-39.45	-44.7	30.49	-7.47	-33.52	-59.43	30.81	11.64	15.93	-55	-29.81	-7.26	-29.02
BRD-K76205745	losartan	Angiotensin receptor antagonist		AGTR1	Angiotensin receptor antagonist	0.03	-90.98	-0.07	49.76	-8.6	-17.46	-12.03	-23.91	-83.88	-34.63	-69.34	-76.95	0.95	-2.96	-32.15	-71	-58.1	-6.71	-85.08	-47	-27.96	-7.22	2.36	-39.23	-49.25	-86.22	-91.81	-68.39	-71.63	-50.14	-18.13	-43.15	-32.08	-42.71	1.02	-21.51	3.06	-96.72	-65.6	-58.01	-19.4	-47.85	-64.17	-94.52
BRD-A61858259	CAY-10415	Insulin sensitizer	PPAR receptor agonist	INS	Insulin sensitizer	0	-42.76	0	0	-26.35	-17.41	39.16	-52.47	-96.58	-53.48	-69.01	10.76	-9.15	0	-81.96	-63.45	-56.5	-9.24	-85.63	-58.27	-75.38	-47.84	-36.23	-68.77	-69.82	-95.99	-23.49	-26.22	10.07	-78.68	-7.89	-49.62	0	-64.84	0	-22.54	0	-87.25	-21.74	-86.58	-62.44	-76.11	-79.57	-92.11
BRD-A56359832	zileuton	Leukotriene inhibitor		ALOX5	Leukotriene inhibitor, Lipoxygenase inhibitor	-0.18	-64.03	-0.21	-0.53	-29.49	-17.4	-77.83	-20.23	-81.5	-24.5	-82.16	-7.63	-0.04	-65.44	-73.77	-93.2	-81.18	-26.79	-96.04	-81.71	-22.81	-70.72	-1.21	-95.61	-60.82	-88.32	-61.02	-61.78	-72.79	-59.02	-48.92	-61.47	-17.17	-7.13	-68.69	-89.36	1.34	-88.99	-87.06	-79.27	-48.65	-91.32	-21.79	-91.05
BRD-K94830329	ataluren	CFTR channel agonist		CFTR, DMD, F8, F9	CFTR channel agonist, Dystrophin stimulant	0	15.25	0	0	-43.2	-17.14	-53.65	-55.54	-45.16	-7.68	-37.63	48.67	42.79	-34.66	-61.34	-19.43	84.65	62.25	-12.33	90.98	25.5	46.65	62.24	47.72	8.85	91.72	-38.73	19.06	-55.54	63.47	-38.94	-23.33	9.04	-30.9	5.87	28.98	-21.68	10.68	25.47	52.52	46.56	53.44	40.35	29.02
BRD-K84987553	MDM2-inhibitor	MDM inhibitor	MDM inhibitor	MDM2	MDM inhibitor	1.44	3.99	-2.52	-0.95	3.5	-17.11	8.56	-21.12	-9.74	-38.59	-63.38	-0.99	-44.18	-70.57	-42.71	-33.16	-55.34	39.07	-54.17	-28.39	-54.53	-36.1	38.39	-32.42	-33.9	-15.96	-82.35	-18.63	-11.13	-38.73	-1.09	-28.08	-7.97	-40.53	0	-49.38	0.99	-15.84	-6.93	-16.11	-2.92	-3.7	-27.85	-28.82
BRD-A92537424	danazol	Estrogen receptor antagonist		ESR1, GNRHR, AR, CCL2, CYP2C8, GNRHR2, PGR, TNF	Estrogen receptor antagonist, Progesterone receptor agonist	-3.65	-88.71	-6.48	-10.22	-1.37	-17.1	-29.03	-73.79	-73.34	-8.03	-90.5	12.34	-31.91	-25.63	-46.18	-50.27	-38.93	-47.49	-77.93	-85.25	-26.16	-80.17	-9.14	-88.46	-94.43	-59.91	-87.83	-69.02	8.96	-81.22	-72.45	-19.55	-27.85	-55.63	-1.06	-17.86	-45.31	-78.59	-57.03	-33.99	-59.92	-71.01	-68.97	-68.4
BRD-K11399644	phenformin	AMPK activator		KCNJ8, PRKAA1	AMPK activator	2.99	-5.44	1.02	-12.76	-8.23	-16.91	5.18	64.42	10.63	16.57	14.24	10.48	-8.17	2.67	47.05	13.26	38.33	1.16	-15.47	19.96	2.5	7.21	1.8	30.19	16.44	4.31	10.77	-1.8	9.08	-31.41	39.07	-3.4	42.39	20.19	1.13	22.24	2.18	10.82	14.01	14.79	35.7	5.4	4.56	23.82
BRD-K52662033	lidocaine	Histamine receptor agonist		SCN5A, EGFR, SCN10A, SCN9A	Histamine receptor agonist	-1.06	-62.31	-1.3	-1.23	0.7	-16.88	-32.26	-77.91	-73.79	-36.41	-64.14	-33.74	-35.52	-66.38	-47.08	-73.78	-81.99	-34.01	-81.98	-88.96	-65.23	-39.89	-30.86	-51.91	-73.43	-69.6	-88.44	-87.92	-69.22	-81.18	-74.71	-12.93	-21.37	-40.14	-80.78	-64.96	-44.53	-73.61	-62.75	-51.99	-50.02	-91.6	-11.1	-98.53
BRD-K48923948	BMS-641988	Androgen receptor antagonist		AR	Androgen receptor antagonist	-11.95	-96.44	-17.74	1.55	0	-16.85	-83.92	-39.73	-77.39	-32.68	-80.32	-19.69	-14.7	-37.85	-66.48	-81.77	-66.68	-51.04	-91.16	-92.68	-74.56	-74.22	-4.59	-96.15	-57.75	-75.36	-83.16	-96.97	-0.81	-90.27	-34.34	-72.59	-56.59	-25.11	-16.1	-78.78	-27.68	-84.69	-70.07	-32.91	-94.03	-95.87	-74.21	-75.14
BRD-A83431637	resmethrin	Cytochrome P450 inhibitor			Cytochrome P450 inhibitor	-4.93	1.43	-10.3	-7.75	-19.59	-16.84	1.27	17.66	15.76	-13.72	10.86	-24.8	-0.6	15.79	-7.08	-16.43	3.75	-35.99	-15.81	-7.46	-3.24	-7.69	-28.59	-17.64	-38.7	37.7	7.45	9.15	51.58	-27.91	71.84	-29.8	-7.08	0	0	-30.39	15.25	-11.29	-24.62	-5.38	3.92	13.78	-33.78	10.54
BRD-K81376179	TCS-359	FLT3 inhibitor		FLT3	FLT3 inhibitor	-15.96	-35.58	-12.21	-71.79	-48.06	-16.76	-51.06	-81.62	-24.06	-5.41	-70.28	-56.88	-14.51	-15.86	-63.67	-92.67	-6.6	40.1	-93.2	-10.58	-52.22	-94.15	-39.43	-34.77	-55.45	-37.3	-65.81	-14.97	-27.12	-52.78	-50.14	-45.48	-1.52	26.47	-65.75	-29.13	11.6	-59.93	-48.76	27.81	-8.3	-13.8	36.38	-35.78
BRD-A03816571	CP-55940	Cannabinoid receptor agonist		CNR1, CNR2, CXCR4, GPR55	Cannabinoid receptor agonist	0.42	-18.05	-15.57	0	-6.92	-16.75	-33.31	0.49	-17.97	-20.89	-35.5	11.41	-8.14	-8.94	-17.63	10.29	-54.86	-38.01	-30.31	-19.99	-7.92	-16.72	-71.12	-21.51	-1.69	-25.87	-32.08	-9.22	-27.46	-9.56	-34.02	-6.8	-46.93	-73.8	4.62	-1.02	-6.7	-47.08	-1.06	-1.02	-10.46	0.6	-20.33	-9.84
BRD-A33833419	TER-14687	Inhibitor of translocation of PKCq in T cells		PRKCQ	Inhibitor of translocation of PKCq in T cells	2.96	-24.32	0	-2.01	3.03	-16.73	-33.38	-3	-67.3	-48.46	-12.69	-28.3	-2.26	-2.57	-29.21	-12.4	-42.02	32.13	-24.6	-5.35	-31.6	-55.44	-10.61	45.59	-29.4	-26.94	-70.4	-2.5	-23.31	-17.21	-30.55	-1.59	0	-11.12	-46.57	-25.36	-12.34	-36.2	-33.3	-62.28	-71.5	-3.17	-74.24	-46.83
BRD-K18194590	mephentermine	Adrenergic receptor agonist		ADRA1A, ADRA1B, ADRA1D, ADRA2A, ADRA2B, ADRA2C, ADRB1, ADRB2, ADRB3	Adrenergic receptor agonist	1.06	-8.6	-4.4	15.33	-1.02	-16.4	44.43	58.98	27.31	35.14	35.3	16.92	46.96	82.98	33.41	-14.03	24.16	22.54	36.19	36.55	32.2	40.37	1.01	5.99	49.95	18.52	74.47	-10.36	65.98	-8.46	23.97	-25.24	8.97	24.62	7.43	70.78	34.34	10.73	7.38	59.64	69.39	37.65	25.71	11.32
BRD-K38305202	domperidone	Dopamine receptor antagonist		DRD2, DRD3, ABCG2, CYP3A5	Dopamine receptor antagonist	1.27	-5.25	1.68	-0.88	0	-16.19	3.68	-30.89	-38.01	0.74	-43.3	-21.34	-0.88	40	-10.83	-12.26	-41.68	24.74	42.07	-8.13	13.66	-8.12	0.95	18.21	16.5	-17.43	48.61	-18.4	18.92	-32.11	-11.02	-4.8	-7.12	-30.49	23.01	-27.6	24.03	5.97	-24.74	47.41	-16.63	10.2	-22.91	8.79
BRD-K98763141	niflumic-acid	Cyclooxygenase inhibitor		CLCNKA, PTGS2, ANO1, CLCN1, CLCNKB, KCNQ1, PLA2G1B, PLA2G4A, PTGS1, UGT1A9	Cyclooxygenase inhibitor	6.34	-42.15	11	29.68	56.03	-16.18	22.79	-65.23	-23.33	4.58	-69.2	-14.01	5.46	-23.84	5.71	-62.68	-11.6	14.36	-67.17	-29.21	23.84	-48.49	5.78	-16.7	-13.1	-69.45	-53.99	9.04	28.91	-45.11	-75.14	-79.05	31.53	5.21	28.23	-50.07	-34.19	-16.78	7.04	44.48	-34.97	-80.52	20.93	-19.92
BRD-K28075147	biochanin-a	Estrogen receptor agonist			Estrogen receptor agonist	0	10.22	3.67	12.39	16.25	-16.18	16.84	-29.26	-38.25	-28.03	-6.58	19.93	-7.94	3.66	3.98	-14.61	7.17	21.35	-13.75	-27.05	15.87	34.78	-7.22	-27.76	-7.82	-31.39	-20.73	-7.22	4.51	-17.36	11.98	-23.1	14.99	-25.87	-19.51	29.18	33.46	-22.83	48.02	47.96	-16.39	-27.84	-32.23	-6.84
BRD-K68867920	quetiapine	Dopamine receptor antagonist		DRD2, HTR1A, HTR2A, DRD1, HRH1, HTR1D, HTR1E, ADRA1A, ADRA1B, ADRA1D, ADRA2A, ADRA2B, ADRA2C, CHRM1, CHRM2, CHRM3, CHRM4, CHRM5, DRD3, DRD4, DRD5, HTR1B, HTR1F, HTR2C, HTR3A, HTR6, HTR7, SLC6A2	Dopamine receptor antagonist, Serotonin receptor antagonist	0.6	38.56	0.53	-6.36	-6.8	-16.09	14.65	35.23	-10.02	-37	-59.41	8.71	-0.49	-32.83	13.18	-36.75	43.71	65.64	-9.37	45.04	-13.98	-27.85	7.75	11.65	14.81	41.38	63.89	8.76	15.3	26.87	20.64	-5.5	13.93	69.36	-25.68	16.25	17.2	43.96	54.25	12.07	31.67	66.95	69.2	33.04
BRD-K00959089	thenoyltrifluoroacetone	Chelating agent		CES1, PPARA, SDHA	Chelating agent	-1.3	-13.09	0.99	0.99	55.2	-16.04	-15.14	-2.26	6.34	0	-32.49	-13.05	-39.11	58.28	-8.09	8.57	-35.5	28.12	-57.86	-27.95	-19.12	-4.84	1.09	-56.07	-9.14	-54.49	-38.92	-0.99	15.32	-14.76	-7.73	6.8	6.24	11.08	-8.32	3.87	-27.15	-0.99	11.24	-20.89	5.91	-9.94	-40.18	-6.79
BRD-K17008822	BD-1008	Sigma receptor antagonist	Sigma receptor antagonist		Sigma receptor antagonist	-0.74	0.35	0.85	20.9	0.7	-16	-4.28	-3.98	2.85	50.04	-17.19	8.17	12.64	-3.28	34.5	0	28.42	24.81	-4.5	-6.26	2.42	9.7	34.51	16.83	22.64	20.97	-11.41	0	0.78	-7.16	-7.28	-0.35	30.09	84.72	-0.46	10.68	-18.66	7.22	9.04	25.46	7.27	6.25	42.34	18.08
BRD-K34098590	tienilic-acid	Sodium/potassium/chloride transporter inhibitor		CYP2C9, SLC12A1, SLC22A12	Sodium/potassium/chloride transporter inhibitor	40.57	-53.75	71.57	-21.55	-56.6	-15.96	-51.8	-24.18	-40.78	-15.34	60.87	43.07	-84.86	-7.39	-24.62	-93.99	-58.45	20.84	-7.48	-49.36	-78.24	18.03	32.59	-67.73	-78.34	-45.97	-34.21	-15.95	-21.72	-62.72	60.85	-73.9	12.09	10.7	33.58	33.24	-14.99	15.61	-21.39	38.8	40.74	-81	42.42	-74.63
BRD-K98684188	GSK-0660	PPAR receptor antagonist		PPARD	PPAR receptor antagonist	-26.84	-3.1	0	46.03	-3.88	-15.96	16.3	44.33	48.64	32.36	3.42	74.13	25.93	35.4	72.66	27.81	-16.72	13.12	-3.03	34.39	-19.36	-76.89	36.15	-3.28	25.38	-63.64	49.94	-3.24	63.11	-28.61	55.36	18.07	56.72	-7.36	34.42	2.14	17.59	27.23	-44.99	-20.68	41.02	39.85	-8.62	3.1
BRD-A84493640	atovaquone	Mitochondrial electron transport inhibitor		DHODH	Mitochondrial electron transport inhibitor	0	-16.59	1.69	-20.81	-18.99	-15.93	-35.5	-25.2	-15.99	-3.74	1.97	13.02	-18.03	-40.14	-15.88	-5.29	-42.3	-20.37	-5.87	-23.02	-3.7	27.46	-2.42	-10.57	-9.71	-28.84	-21.33	-53.59	-2.08	-4.91	-22.96	-26.32	8.44	-2.57	2.11	0	-17.16	-8.76	-40.28	-45.36	-3.49	-32.42	2.45	-38.96
BRD-K01902415	pirinixic-acid	PPAR receptor agonist	PPAR receptor agonist	PPARA	PPAR receptor agonist	-0.99	-22.73	-2.18	-1.3	0	-15.86	-44.09	-8.14	-28.92	-56.81	-53.34	-71.99	-15.81	-22	-41.41	-46.48	-34.18	-38.07	-25.25	-41.37	-34.4	-36.25	-7.36	-34.79	-44.04	-24.23	-11.37	-44.76	12.79	-47.8	6.24	-32.03	-26.28	-78.03	-23.28	-39.65	28.1	-13.86	-15.54	50.59	-38.22	-52.87	-35.86	-48.8
BRD-K24538644	KUC104502N	-666		OPRK1	-666	-4.23	-88.06	-3.71	-12.12	-5.57	-15.66	-87.55	-33.64	-84.93	-21.47	-60.15	-40.36	-25.49	-28.66	-20.12	-75.52	-38.71	0	-12.15	-37.5	-6.32	-6.07	-29.4	-64.36	-68.14	-61.32	-63.15	-27.98	-41.54	-59.95	-50.63	-59.84	0	11.41	-56.61	-50.84	-40.96	-40.36	-47.57	2.38	-30.89	-46.39	-12.62	-61.02
BRD-K88868628	iodoacetic-acid	Cysteine peptidase inhibitor			Cysteine peptidase inhibitor	0	11.25	0	0	0	-15.64	62.16	43.93	62.54	2.49	68.14	14.82	0	11.86	75.41	72.06	53.31	44.76	80.04	81.33	47.1	46.49	19.67	62.54	0	60.28	29.37	26.38	-41.1	36.29	47.85	34.4	18.47	13.34	30.15	2.68	37.32	46.16	12.56	28.38	85.51	54.27	3.31	58.05
BRD-K94080537	diethyltoluamide	DEET activator of fly antenna ionotropic receptor IR40a			DEET activator of fly antenna ionotropic receptor IR40a	-9.86	-53.19	-34.44	14.01	-5.28	-15.6	-10.72	-47.45	-1.55	-0.7	-63.05	-7.4	-35.51	-5.12	-19.49	10.02	-28.25	-3.7	-12.48	-30.5	-18.94	-28.86	-18.13	-23.74	-24.87	-56.28	-28.77	15.88	7.24	-21.45	-4.39	-27.15	7.25	1.13	-6.85	-6.77	40.81	-28.76	-16.4	12.73	-60.89	-27.65	-10.57	-33.43
BRD-A15297126	fluocinonide	Glucocorticoid receptor agonist	Glucocorticoid receptor agonist	NR3C1, SERPINA6, SMO	Glucocorticoid receptor agonist	2.86	9.64	28.13	-9.3	-74.94	-15.6	-21.5	0	-36.94	-51.39	-5.1	-7.96	-55.98	2.33	-81.21	-52.19	2.15	67.6	-13.9	32.36	-48.1	-74.93	-24.34	-73.5	-4.16	5.6	-3.07	-25.9	-5.6	-37.98	-47.79	-8.25	-1.73	45.31	0	-70.03	35.97	-33.53	3.32	8.61	-12.05	-10.85	90.21	-12.05
BRD-K70577657	H-9	PKA inhibitor	PKA inhibitor	PRKACA	PKA inhibitor	0	-12.53	0	-3.17	-1.83	-15.6	3.17	33.56	41.93	-85.94	24.19	-16.44	-29.68	75.92	45.35	20.26	55.84	0	22.28	11.76	13.78	-1.29	14.84	70.22	-14.98	57.64	5.93	5.77	1.76	47.1	-60.02	-1.44	-32.73	31.41	5.86	-6.48	4.55	-1.09	6.83	87.69	35.2	6.88	18.42	-26.74
BRD-K38323065	phenacetin	Cyclooxygenase inhibitor	Cyclooxygenase inhibitor	PTGS1	Cyclooxygenase inhibitor	0.25	-35.16	-0.6	-0.6	-16.71	-15.51	-60.99	-31.74	-68.39	-29.84	-28.55	-22.88	-12.35	-1.44	-33.43	-56.16	-56.77	-36.62	-61.87	-58.39	-27.66	-39.74	-6.17	-78.77	-25.5	-54.29	-23.8	-24.44	-9.86	-47.74	-15.82	-29.07	-0.6	-8.88	-1.2	-21.83	-4.67	-11.68	-32.02	-0.81	-27.73	-28.93	-16.22	-67.69
BRD-K83597974	pargyline	Monoamine oxidase inhibitor		MAOB, MAOA	Monoamine oxidase inhibitor	0	-46.98	-0.35	0.88	20.65	-15.27	-32.65	0.88	-28.31	-9.61	-8.07	5.11	-14.92	0.24	-23.52	-26.05	-14.9	-18.51	-20.49	-7.57	-1.73	1.9	-3.72	-17.35	-65.56	-55.37	-59.88	-47.73	-17.58	-9.61	-38.89	-39.75	-6.96	-12.95	-15.59	-1.2	19.31	-39.98	-3.47	-1.52	-28.91	-27.32	-7.22	-49.51
BRD-K96527333	dehydroisoandosterone	GABA receptor modulator			GABA receptor modulator	0	-52.44	0	-2.71	-35.66	-15.05	-27.65	-31.09	-22.31	-13.52	-46.2	-17.96	-26.68	25.79	-47.95	-59.98	-41.17	-2.15	-73.12	-62.11	-41.43	-47.5	-10.31	-37.77	-41.15	-21.67	-56.31	-60.46	-11.11	-58.58	1.02	-16.99	-35.31	-42.28	-1.27	-9.07	-31.19	-44.55	-1.3	-26.66	7	-38.8	-24.94	-66.87
BRD-K51816706	oxindole-I	VEGFR inhibitor		AKT1, KDR, PDPK1, RET	VEGFR inhibitor	9.37	67.6	1.06	-6.05	15.42	-15.04	77.56	85.64	71.08	1.18	47.56	18.6	1.06	45.29	50.06	66.24	49.18	21.35	39.8	88.71	21.44	62.72	-8.84	59.79	28.29	78.75	43.92	72.75	9.16	82.08	86.8	65.96	10.37	58.74	32.17	55.01	33.97	55.26	29.82	42.49	70.97	65.63	31.56	72.26
BRD-A59215453	lobelanidine	Acetylcholine receptor antagonist		SLC18A2, CHRNA10, CHRNA4, CHRNA9, CHRNB2, OPRM1	Acetylcholine receptor antagonist, Dopamine receptor modulator, Opioid receptor antagonist, Vesicular monoamine transporter ligand	1.62	-8.63	1.3	1.37	-32.54	-15.02	1.62	-67.99	37.8	-2.29	15.07	25.82	-50.47	13.23	-49.67	-20.91	52.73	2.26	-8.83	7.25	-15.13	-54.08	22.14	14.81	8.91	7.58	19.39	-12.8	-2.04	35.17	-53.66	-54.51	7.9	36.41	0	64.52	46.02	39.83	1.62	50.17	33.31	34.84	39.69	34.32
BRD-A64977602	mirtazapine	Adrenergic receptor antagonist		ADRA2A, HTR2A, HTR2C, ADRA2C, HTR3A, ADRA1A, ADRA1B, ADRA1D, ADRA2B, ADRB1, ADRB2, DRD1, DRD2, DRD3, DRD5, HRH1, HRH3, HTR2B, HTR7, OPRK1, SLC6A2, SLC6A3, SLC6A4	Adrenergic receptor antagonist, Serotonin receptor antagonist	0	-8.62	-0.85	-1.34	18.65	-14.93	-6.38	6.76	-14.24	20.84	-36.18	5.46	-5.77	-17.06	-4.37	-4.68	-4.77	-0.78	-17.98	-62.04	3.24	25.18	3.78	21.87	-14.91	-18.09	-54.87	-13.25	8.23	-49.46	-11.96	26.96	2.64	-24.2	1.55	-29.34	-5.46	-11.91	33.2	4.58	-49.04	17.11	-6.06	-82.49
BRD-A32164164	methyllycaconitine	Acetylcholine receptor antagonist		CHRNA7	Acetylcholine receptor antagonist	0	-40.05	-1.66	3.13	-12.24	-14.87	-39.85	-12.06	-64.11	-25.37	-37.89	-8.55	-9.43	18.51	-25.86	-30.43	-35.12	-36.5	-39.47	-33.21	-34.83	-52.11	-18	-34.76	-10.68	-31.6	-24.41	-19.14	-14.75	-46.96	-20.28	-5.54	-20.79	-40.81	16.61	-44.13	8.73	-36.44	-2.64	-46.36	-50.39	-22.68	-21.1	-22.99
BRD-A96897502	U-74389F	Lipid peroxidase inhibitor			Lipid peroxidase inhibitor	-32.21	-22.82	-2.43	-8.39	-6.3	-14.8	-3.15	-22.98	-27.61	-9.63	-43.86	-16.27	-18.93	-67.61	-1.34	-36.12	-27.53	-6.94	-18.63	-45.3	-19.33	-46.56	-5.84	-35.53	-17.73	-12.91	-16.81	-26.8	-6.66	-7.62	-24.46	-16.75	-2.87	-7.17	0.95	-22.38	-0.95	-18.31	-47.77	-6.34	0.92	-24.1	-31.92	-39.35
BRD-K32247306	primidone	GABA receptor antagonist		GABRA1, CHRNA4, CHRNA7, GABRA2, GABRA3, GABRA4, GABRA5, GABRA6, GABRB1, GABRB2, GABRB3, GABRD, GABRE, GABRG1, GABRG2, GABRG3, GABRP, GABRQ, GRIA2, GRIK2	GABA receptor antagonist	-0.28	-6.55	-5.14	5.36	-2.85	-14.76	-5.43	-1.76	-5.06	3.74	-2.11	14.03	-8.64	-6.17	-22.16	-22.93	-9.92	-0.56	-21.26	-13.71	2.18	-16.88	4.41	3.35	-23.98	-1.44	-17.89	6.98	14.59	-1.66	-27.18	-65.63	-4.04	3.63	5.43	9.67	3.19	-2.07	-2.96	5.83	-42.35	-55.62	3.11	-13.68
BRD-A97674275	ranolazine	Sodium channel blocker		SCN9A, SCN10A, SCN5A, SLC22A2	Sodium channel blocker	-0.85	-2.94	-0.32	-1.09	0.18	-14.64	5.62	-0.78	8.21	6.11	-16.78	28.62	1.69	1.02	19.31	2.18	-4.71	1.68	6.21	16.44	13.41	3.63	-1.09	4.12	4.3	-16.29	-11.96	-8.8	9.05	8.29	0.28	4.72	2.15	13.15	4.79	2.75	-22.9	9.51	11.05	16.9	-26.15	28.59	-1.3	6.35
BRD-A93206962	L-755507	Adrenergic receptor agonist		ADRB3, ADRB1, ADRB2	Adrenergic receptor agonist	-0.03	-4.21	0.78	0.03	-54.21	-14.57	-2.43	13.65	5.69	5.6	-90.11	11.7	4.36	-74.78	26.12	12.4	6.16	5.55	-7.06	-64.07	4.13	-34.68	15.18	34.37	-2.22	-17.01	-63.78	-8.61	-0.39	-53.29	-23.73	-6.23	-23.36	27.53	-2.45	-4.47	4.37	-36.22	6.06	16.12	66	51.67	-15.67	-37.42
BRD-A39747742	estradiol-valerate	Estrogen receptor agonist	Estrogen receptor agonist	ESR1	Estrogen receptor agonist	0	-9.34	-1.66	3.4	62.31	-14.51	73.8	13.09	35.57	40.11	49.29	24.8	-14.22	45.39	23.84	-44.61	67.49	-15.33	29.1	50.37	13.9	14.49	-1.94	57.78	1.8	56.84	40.84	31.11	-8.87	42.09	48.03	-1.66	10.78	47.65	18.67	38.14	0	31.12	72.77	64.5	53.88	33.82	21.83	37.52
BRD-K53878242	MMPX	Phosphodiesterase inhibitor			Phosphodiesterase inhibitor	1.09	-22.06	-11.7	-1.23	-1.34	-14.43	-8.84	24.32	-16.36	2.01	-4.97	-24.05	2.18	25.74	-4.44	4.87	-23.23	-25.38	-49.79	-39.28	-46.06	-42.4	-26.29	3.52	-11.62	14.42	-15.27	-5.68	9.54	-59.34	30.06	-17.02	1.69	-8.75	4.99	-11.11	-9.68	-8.11	-39.26	-21.18	24.51	-14.81	-13.58	-14.72
BRD-K51575138	TPCA-1	IKK inhibitor	IKK inhibitor	IKBKB	IKK inhibitor	93.16	92.29	96.6	-97.15	66.1	-14.34	72	0.88	37.9	0	76.18	43.03	-67.26	15.33	-26.03	-35.77	81.53	-35.38	65.71	9.55	80.81	14.29	-1.47	-17.05	-18.37	62.77	11.04	59.98	23.57	86.83	3.56	29.46	-10.14	-48.84	4.92	30.4	56.01	52.21	-55.59	57.46	58.92	41.62	0.95	52.98
BRD-A56892734	esomeprazole	ATPase inhibitor		ATP4A, CYP2C19, CYP3A4	ATPase inhibitor	-7.35	-5.85	-14.95	1.06	-45.24	-14.26	24.24	7.95	-68.77	-46.45	-50.36	-31.25	-59.49	-14.51	-28	-39.06	-54.78	-2.16	-29.03	-30.55	-40.1	-18.1	-40.75	13.25	-21.86	-54.3	-46.93	-47.06	-0.63	-19.47	-51.13	24.33	-16.46	0.63	-1.26	-21.23	-1.66	-41.22	-32.24	-34.13	-26.62	-38.45	9.05	-42.5
BRD-K63151507	MNITMT	Lymphocyte inhibitor			Lymphocyte inhibitor	0.49	-3.31	-2.22	24.74	-27.56	-14.22	-0.63	-14.24	4.79	0.63	-35.67	35.87	34.5	62.48	-32.69	1.34	-21.36	45.16	-18.55	13.52	-13.33	7.08	-1.37	-6.76	20.71	-4.5	-32.83	-9.94	-1.87	-20.68	-6.2	-8.5	-53.24	8.17	-9.17	23.86	-30.82	-12.16	14.99	1.13	-26.09	-12.57	-26.83	13.87
BRD-K01638814	rilmenidine	Adrenergic receptor agonist	Imidazoline ligand	NISCH	Adrenergic receptor agonist, Imidazoline receptor agonist	-2.64	-91.91	-36.65	0.81	0	-14.15	-80.61	-41.89	-92.9	-14.57	-79.61	-65.81	-38.42	-49.15	-49.23	-88.29	-93.79	-55.21	-77.08	-89.24	-37.27	-67.17	-12.65	-89.7	-53.58	-90.78	-94.77	-93.2	-1.87	-86.09	-45.37	-61.15	-88.59	-55.86	-1.76	-48.4	-69.45	-81.13	-92.49	-37.6	-88.65	-95.61	-83.5	-83.91
BRD-K04877770	FTase-inhibitor-B581	Farnesyltransferase inhibitor			Farnesyltransferase inhibitor	-0.67	-15.99	-47.04	1.34	19.54	-13.89	22.1	-20.66	-25.94	7.22	-12.53	40.52	3.84	11.95	18.73	-10.19	56.69	13.36	-15.56	-23.54	-23.25	26.88	8.03	24	-26.22	39.55	-31.27	-14.66	45.93	-17.28	11.71	-20.41	7.08	-12.86	49.84	-35.71	37.13	18.56	18.25	39.07	21.52	43.96	-16.89	29.51
BRD-K64517075	heliomycin	ATP synthase inhibitor			ATP synthase inhibitor	52.26	71.45	62.93	-62.95	58.35	-13.89	85.55	68.89	61.95	6.59	69.73	53.55	0	-47.75	10.71	78.5	66.49	0	78.29	78.99	73.96	13.79	-14.94	30.47	0	83.57	18.98	68.52	0	79.84	78.12	56.07	-40.42	-51.72	-5.78	44.47	0	58.99	54.17	12.93	75.47	57.63	0	73.87
BRD-K07325606	hispidin	PKC inhibitor		PREP, PRKCB, PTGS2, XDH	PKC inhibitor	0.95	-28.87	-2.33	25.49	1.48	-13.86	4.09	-17.87	-76.82	-45.27	-62.79	-6.17	37.52	-15.77	1.19	-38.28	-76.39	-8.2	-37.3	-31.3	4.81	-55.2	-13.11	-54.1	-35.42	-33.78	-44.04	-1.73	13.92	-55.08	-16.54	-49.15	0	-20.19	-9.91	-45.39	-18.31	-8.39	-28.84	-51.29	-7.02	-17.74	-16.65	-66.37
BRD-K95309561	dienestrol	Estrogen receptor agonist	Estrogen receptor agonist	ESR1	Estrogen receptor agonist	0	-13.99	-1.27	0	-27.38	-13.77	-58.97	-11.74	-65.41	-67.69	-61.75	-16.5	-53.68	-1.3	-36.14	-58.36	-64.95	3.17	-79.08	-26.54	-31.87	-62.52	1.16	-28.85	-5.81	-58.95	-58.25	-56.02	-10.19	-85.83	-18.69	-19.19	-32.78	-21.19	-31.84	-21.77	-7.39	-56.25	-59.72	-10.65	-32.81	-75.08	8.48	-61.73
BRD-A74667430	etodolac	Cyclooxygenase inhibitor	Cyclooxygenase inhibitor	PTGS2, PTGS1, RXRA, TRPV1	Cyclooxygenase inhibitor	-10.67	-51.94	-2.18	-10.19	-8.21	-13.75	-65.73	-42.73	-65.47	-23.29	-81.84	-11.76	-8.58	-67.36	-37.59	-48.11	-57.37	-22.39	-74.31	-64.58	-48.01	-29.21	-9.38	-76.85	-68.97	-79.37	-30	-16.1	-12.95	-67.64	-48.61	-30.11	-5.72	-20.99	-21.69	-51.32	-72.78	-39.98	-45.7	-27.3	-57.22	-51.32	-6.14	-41.65
BRD-A39390670	rabeprazole	ATPase inhibitor		ATP4A, CYP2C19	ATPase inhibitor, Gastrin inhibitor	0.88	-26.62	0.17	-1.34	-11.69	-13.71	14.64	-83.63	-4.12	-5.2	-50.86	-12.56	6.95	-5.14	22.99	-38.34	-8.86	-0.46	-21.01	-7.02	-12.84	-20.15	-1.52	-6.95	-37.09	-4.93	-4.72	-16.02	28.15	0.67	37.34	-12.97	-33.51	6.62	-3.66	-43.62	14.16	16.22	-68.68	-15.96	-18.62	-27.73	0.35	12.54
BRD-K33193182	methylnorlichexanthone	Aurora kinase inhibitor		AURKB, KDR, PIM1	Aurora kinase inhibitor, PIM inhibitor, VEGFR inhibitor	-1.39	-85.29	7.18	-28.44	-5.9	-13.67	-38.5	-54.37	-74.35	-21.7	-30.63	11.16	-9.55	-20.68	-40.84	-42.38	-48.54	-34.86	-57.21	-86.74	-21.71	-64.38	-33.31	-34.34	-45.15	-74.91	-64.97	-40	-36.87	-50.11	-45.63	-37.83	7.93	-21.42	30.47	-33.37	-31.19	-28.42	-19.97	-24.07	-45.49	-65.41	-29.5	-45.95
BRD-K60923938	veratridine	Sodium channel activator		SCN1A, SCN3A, SCN8A, SCN9A	Sodium channel activator	0.63	-42.79	0	13.22	-4.23	-13.67	-17.95	-3.76	-64.95	7.53	-67.34	-4.62	-1.41	2.04	-57.98	-42.68	-36.33	24.99	-19.6	-75.5	5.05	6.04	13.75	-12.18	-60.29	-66.14	-50.62	-49.32	8.15	-52.01	-20.62	-22.65	-1.3	18.71	1.73	-39.52	-25.82	-56.18	-46.24	17.42	-15.68	1.8	-18.85	-29.64
BRD-K85503079	perospirone	Dopamine receptor antagonist		DRD2, HTR2A, DRD3, DRD4, HTR2C	Dopamine receptor antagonist, Serotonin receptor antagonist	11.83	59.04	30.26	-34	-14.83	-13.6	-55.58	9.19	-27.12	13.21	-42.14	9.05	6.69	40	0.49	-29.73	6.16	69.36	-72.61	-20.4	-24.09	-71.2	1.21	-21.56	11.79	6.55	23.96	-1.16	-27.23	-13.48	-28.51	-11.06	-18.61	-20.96	0.13	-12.9	-0.35	-13.27	19.56	-26.43	28.26	15.83	49.38	28.56
BRD-A52193669	withaferin-a	IKK inhibitor	IKK inhibitor	ACHE, BCHE, IKBKB	IKK inhibitor	0	3.25	-29.47	91.58	-11.01	-13.6	60.79	4.08	8.72	-1.34	13.86	1.83	79.06	39.52	29.55	73.31	25.06	1.23	25.32	1.2	26.81	24.29	-91.09	50.98	-1.2	31.49	6.34	20.65	-1.87	-3.67	-0.6	46.54	-1.62	-37.61	1.76	1.28	53.1	42.25	9.91	53.11	-1.09	50.6	33.05	43.58
BRD-K90789829	nefazodone	Adrenergic inhibitor		HTR2A, SLC6A4, HTR2C, SLC6A2, ADRA1A, ADRA1B, ADRA2A, CYP3A4, CYP3A5, CYP3A7, HTR1A, SLC6A3	Adrenergic inhibitor, Norepinephrine reuptake inhibitor, Serotonin receptor antagonist, Serotonin reuptake inhibitor	0.02	71.22	0.95	-0.95	-3.17	-13.48	29.48	41.67	-10.37	0.67	38	22.3	44.8	-34.79	28.88	22.65	47.54	45.9	63.69	49.38	-10.53	-24.25	0.39	-17.44	-21.48	41.24	42.61	31.06	-18.78	16.24	-4.93	-20.48	-0.02	46.03	-11.86	23.1	6.39	32.38	27.17	38.92	85.49	46.51	85.48	82.81
BRD-A83237092	fulvestrant	Estrogen receptor antagonist	Estrogen receptor antagonist	ESR1, EPHX2, ESR2, GPER1	Estrogen receptor antagonist	-4	10.81	4.55	-46.93	2.11	-13.31	1.5	0	-19.26	-2.26	-63.32	-2.78	-4.65	2.29	-54.93	6.1	34.21	13.39	-14.39	29.43	-9.51	-64.01	-2.01	8.14	-19.98	17.89	8.67	4.9	-2.59	6.13	2.01	-4.03	27.1	39.59	10.61	11.51	61.65	-69.79	6.81	3.55	-10.56	-57.09	66.71	-0.88
BRD-A50737080	CGK-733	ATR kinase inhibitor		ATM, ATR	ATR kinase inhibitor	60.6	85.27	68.3	-84.11	-36.22	-13.31	87.72	27.55	59.48	-2.43	51.14	42.73	0	-28.95	-23.24	67.74	41.47	71.48	67.2	72.82	71.51	-32.86	-69.95	59.57	-38.66	71.68	-56.1	46.59	-48.03	76.64	-2.99	36.74	-2.68	-60.68	-38.34	17.33	31.13	53.33	20.2	27.76	53.47	70	65.59	76.97
BRD-K82731415	olomoucine	CDK inhibitor		CDK1, CDK2, CDK5, MAPK1	CDK inhibitor	0	4.5	20.28	-49.85	-1.8	-13.26	4.02	-86.43	-89.11	-20.4	-35.55	-86.43	-39.14	4.51	-73.26	-30.7	-84.62	10.21	-47.13	-45.15	-27.15	-24.76	-39.38	-39.13	-71.51	-65.36	-64.21	-30.9	3.63	-46.46	-39.78	9.65	-4.02	-28.54	-24.43	-3.84	-3.52	-46.45	-56.89	-24.81	-93.55	-77.67	-78.79	-61.6
BRD-K10065684	dantron	Laxative			Laxative	0.88	29.02	9.54	-1.02	-1.59	-13.11	23.14	27.33	-6.81	26.64	24.92	2.85	1.2	12.61	-17	-24.78	8.9	-23.26	6.6	40.78	15.7	35.33	46.52	13.97	-15.29	16.53	40.11	0.99	5.67	7.86	48.58	1.87	-0.88	0.99	60.22	8.78	37.88	6.51	41.41	-8.83	23.69	-6.04	69.9	-18.38
BRD-A85472596	L-670596	Prostanoid receptor antagonist			Prostanoid receptor antagonist	0	25.7	19.93	-1.52	-11.55	-13.1	15.79	0	-2.42	6.95	29.94	8.7	25.34	36.24	23.2	2.68	12.36	4.93	-50.64	6.29	16.72	49.36	7.31	11.07	2.33	5.08	-7.29	46.67	41.43	6.96	6.59	10.66	-8.73	13.01	50.35	4.27	37.74	-8.84	58.88	3.78	35	12.02	12.99	23.63
BRD-A62071884	siguazodan	Phosphodiesterase inhibitor		PDE3A	Phosphodiesterase inhibitor	1.9	17.85	1.27	-2.82	-1.8	-13.06	27.96	35.64	49.18	-12.16	28.11	-41.83	-32.9	-2.22	12.22	-22.91	-5.39	-9.35	-24.9	20.19	11.88	-20.36	24.44	44.34	22.52	7.12	37.85	-8.17	44.69	-32.29	-39.18	-8.24	1.83	-43.26	47.16	20.74	19.55	-35.21	17.55	42.41	17.07	47.31	-15.32	-9.54
BRD-K50325075	UCL-2077	Slow after hyperpolarization channel blocker			Slow after hyperpolarization channel blocker	-1.48	-1.48	0	26.27	18.23	-13	-4.62	3.25	-11.03	-11.71	-19.86	5.53	-22.56	5.14	-34.04	-0.74	-0.85	-46.19	-23.22	-12.51	-0.88	11.46	-8.81	-23.66	-24.6	-43.91	-84.53	-3.53	22.74	-6.47	2.82	-1.12	-7.6	-20.4	1.16	16.03	8.49	-40.32	-10.78	-59.25	-47.41	-0.49	-29.9	9.38
BRD-K48692744	NU-1025	PARP inhibitor		PARP1	PARP inhibitor, DNA dependent protein kinase inhibitor	0	-55.68	-0.53	-10.43	-13.46	-12.83	-49.33	-11.82	-51.53	5.7	-94.55	-23.37	-5.09	-58.2	-40.85	-74.4	-80.23	-34.58	-73.95	-47.59	-45.53	-35.65	-13.5	-70.41	5.22	-47.23	-65.27	-35.01	-6.39	-93.09	3.99	-7.4	-1.06	-58.8	-18.35	-24.28	-15.75	-65.57	-48.8	-36	-25.95	-82.12	-9.6	-32.64
BRD-A44090213	indoprofen	Cyclooxygenase inhibitor	Cyclooxygenase inhibitor	PTGS1, PTGS2, CXCR1, CXCR2	Cyclooxygenase inhibitor, Prostanoid receptor antagonist	-0.03	-44.62	-0.46	-7.98	-1.94	-12.76	-54.85	-23.97	-53.81	-52.77	-58.45	-26.42	-56.36	-0.42	-38.27	-21.7	-50.91	-86.78	-9.3	-32.87	-10.39	7.38	17.3	-70.02	-33.93	-61.32	-54.46	-70.11	17.06	-71.67	-19.15	6.31	-0.14	-13.93	-28.65	-43.22	-44.13	-28.43	-62.58	15.85	-51.62	-75.96	-11.63	-37.11
BRD-K19894101	MST-312	Telomerase inhibitor		TERT	Telomerase inhibitor	-66.49	-2.92	-7.64	-21.83	7.75	-12.49	52.46	34.4	6.41	-5.58	3.47	47.82	32.17	-31.68	-27.07	-0.84	-15.91	-1.76	21.09	61.46	63.59	30.18	1.59	8.53	-1.73	4.42	-29.69	59.22	-58.95	86.26	-15.1	75.41	-32.19	6.19	-1.55	96.69	4.18	18.25	1.17	-44.83	-19.03	2.91	5.12	8.62
BRD-K28168037	fenretinide	Apoptosis stimulant	Retinoid receptor agonist	CYP2C8, CYP3A5, RARA, RARG	Apoptosis stimulant, Retinoid receptor agonist	0	46.83	19.55	-6.03	-31.29	-12.43	43.37	26.23	-34.3	-1.9	42.29	24.12	2.5	12.19	53.48	42.83	-14.38	9.03	31.53	44.28	29.38	-13.53	-8.99	53.08	76.31	63.58	39.13	48.82	-28.32	41.16	56.74	-8.38	-11.54	52.25	24.45	37.8	20.74	55.26	35.44	40.69	42.53	83.98	75.83	48.77
BRD-K22385716	LY-303511	Casein kinase inhibitor	Bromodomain Inhibitor	CSNK2A1, CSNK2A2, CSNK2B, MTOR	Casein kinase inhibitor, MTOR inhibitor, PI3K inhibitor	0.53	8.34	0	-36.28	1.3	-12.41	3.66	-19.49	11.85	-35.4	0.7	-88.17	-24.28	-72.93	-52.98	-34.16	-62.2	-96.32	7.7	1.16	-46.57	-11.85	-99.19	-61.11	-83.4	8.31	1.3	11.36	-77.89	-10.91	9.11	-26.71	-26.62	-95.05	-8.44	1.16	0	-58.83	-1.02	-6.58	-52.23	-9.24	-12.41	-20.93
BRD-A39290993	cyproterone	Androgen receptor antagonist	Androgen receptor modulator, Progesterone receptor antagonist	AR, ADORA1, ESR1	Androgen receptor antagonist, Progesterone receptor agonist, Testosterone receptor antagonist	-1.48	7.01	-1.59	0.81	-0.67	-12.41	18.05	31.47	29.05	32.17	54.65	61.89	-1.34	0.63	8.68	0.7	17.94	16.02	51.06	68.23	34.08	11.73	3.69	10.41	14.38	9.73	17.55	26.41	7.08	64.74	38.09	7.19	-4.09	45.2	1.69	35.78	37.08	6.2	-26.82	34.84	7.83	-15.82	8.04	16.25
BRD-K99174507	cardiogenol-c	Cardiomyogenesis inducer			Cardiomyogenesis inducer	2.82	-1.27	1.55	-30.16	0	-12.31	7.4	7.41	35.57	-11.15	-4.94	1.66	-16.73	10.47	-13.27	-25.07	4.55	1.13	4.61	-44.07	29.04	-8.11	1.94	-32.02	-26.36	15.02	-27.67	-29.61	12.55	3.44	11.77	-1.66	-4.76	3.73	30.35	11.73	1.94	34.61	35.41	-1.27	1.2	-12.33	3.87	-55.88
BRD-K83508485	FK-888	Tachykinin antagonist	Tachykinin antagonist	TACR1, TACR2	Tachykinin antagonist	-1.13	8	0	-4.16	0.74	-12.3	55.49	80.29	51.41	7.81	12.18	34.64	-3.39	-2.4	53.96	8.75	24.08	33.48	72.2	59.61	21.28	12.77	8.97	27.51	3.78	75.51	7.84	13.05	42.14	44.9	67.13	20.5	-10.62	1.62	19.05	52.36	42.1	51.03	1.37	53.73	45.12	74.3	32.24	5.89
BRD-K49519144	LY-2140023	Glutamate receptor agonist		GRM3, GRM2	Glutamate receptor agonist	-22.52	-77.07	-39.5	-39.49	-16.83	-12.28	-19.51	0	-55.16	4.95	-28.88	-67.85	-7.44	-34.23	-35.96	-15.49	-6.79	6.88	25.97	-55.25	-5.92	48.52	22.52	-7.84	-17.35	-15.42	-76.44	14.47	-83.93	-25.43	-50.63	-43.32	-27.35	-8.2	-21.2	-27.22	-67.12	-61.65	-6.56	-12.41	-30.03	-58.46	0	-31.76
BRD-A93236127	digitoxin	ATPase inhibitor	ATPase inhibitor	ATP1A1	ATPase inhibitor	0.81	32.5	1.37	-77.42	15.14	-12.26	67.17	28.12	80.43	-73.39	-1.31	28.21	-21.69	-38.98	43.88	37.62	13.53	-60.36	48.16	7.53	2.89	7.87	-93.13	36.21	-77.42	50.21	9.33	21.85	-29.65	24.84	-13.6	48.17	-17.14	1.09	6.83	22.91	34.7	51.54	-14.08	47.54	47.29	9.3	6.37	-7.42
BRD-K77641333	naphazoline	Adrenergic receptor agonist		ADRA1A, ADRA2A	Adrenergic receptor agonist	1.06	-26.69	1.06	2.26	-9.08	-12.12	-58.37	0	-41.78	-1.02	-60.24	-2.78	-16.94	-18.81	-65.22	-87.68	-49.58	-46.21	-34.06	-54.72	-35.35	-30.76	-27.39	-84.11	-73.56	-36.32	-77.15	-9.85	-30.74	-42.26	-72.86	-26.06	-10.52	-13.11	-30.56	-63	-6.77	-39.86	-6.43	-11.58	-26.02	-10.52	-9.13	-49.76
BRD-K78838262	austricine	Hypolipidemic			Hypolipidemic	-0.73	-18.15	19.72	-25.4	-1.11	-12.11	7.76	34.71	-53.28	-35.37	30.66	-7.88	-23.83	1.22	-24.38	-26.86	-13.85	26.22	23.07	-27.22	1.79	-33.06	-19.76	-26.03	1.14	-34.56	-13.47	-14.17	-6.24	-70.94	-9.54	8.99	-11.41	8.7	5.43	-23.03	-41.29	-11.74	-20.55	-61.81	-21.47	-52.11	-22.83	-12.86
BRD-K28346421	rifapentine	RNA polymerase inhibitor		CYP2C8, CYP3A4	RNA polymerase inhibitor	0	0	0	0	4.96	-12.06	11.09	-1.41	4.32	-31.87	-3.24	7.24	-0.78	0.67	-47.2	-73.17	-20.79	-0.7	-6.57	-3.66	-9.98	-61.86	0.49	-85.72	-38.41	1.66	-31.79	-58.2	0.46	-17.64	3.74	0	-10.17	-32.13	39.84	-2.96	19.53	-0.67	-0.81	1.97	4.33	19.7	-67.11	-0.74
BRD-K19533706	tranilast	Angiogenesis inhibitor		HPGDS, HRH1, IDO1, IFNG, IL10, IL2, IL4, SLC22A12, TGFB1, TNF, TRPV2	Angiogenesis inhibitor	0.18	-8.35	0	-9.24	-47.9	-12.06	10.29	-49.6	-73.11	-63.17	-55.92	-26.48	-1.95	-53.9	23.42	-37.34	2.1	9.55	-73.1	-29.61	-23.23	-46.41	-1.83	-14.82	-24.81	-11.76	-30.27	-14.67	-0.67	10.9	-21.9	24.47	-31.54	17.87	19.58	-21.51	1.83	1.41	-1.83	-31.11	22.91	-2.68	-23.17	-60.18
BRD-A67862938	naftidrofuryl	Adrenergic receptor antagonist			Adrenergic receptor antagonist	0.11	0.14	2.14	-29.06	-10.98	-11.86	-52.69	-39.97	-57.69	-73.83	-27.08	-5.43	-67.34	-71.07	-68.82	-50.2	-42.52	-16.68	-16.81	-60.67	-38.36	-58.08	0.14	-59.14	-18.89	-14.63	-81.7	-32.36	-25.35	-13.92	-57.11	17	-30	-16.51	-27.8	-63.73	-8.65	-41.56	-25.63	-78.01	-60.94	-31.33	-28	-28.79
BRD-K57033106	tripelennamine	Histamine receptor antagonist		HRH1	Histamine receptor antagonist	-16.96	-84.53	-21.5	-1.87	0.78	-11.81	-27.94	-75.97	-34.52	-14.61	-53.13	1.73	-2.01	11.35	-9.31	-89.58	-12.54	-17.9	-38.07	-55.81	8.94	-24.4	6.11	-43.03	-26.55	-86.62	-52.24	-41.61	-37.63	-66.28	-18.98	-19.74	-1.9	6.28	-11.58	-3.7	-16.98	-30.31	-4.05	-32.18	11.69	-49.41	-15.45	-28.09
BRD-A35912562	pregnenolone	Glutamate receptor modulator		CYP17A1, PGR, SULT2B1	Glutamate receptor modulator, Acetylcholine release enhancer, Dopamine release enhancer, GABA receptor negative allosteric modulator	0.11	7.25	3.21	-29.76	-17.84	-11.8	19.65	47.82	47.23	3.66	43.47	5.57	7.86	26.27	48.49	23.38	63.98	66.22	9.67	44.79	-0.63	12.15	7.34	31.18	21.05	34.43	62.88	2.89	14.63	73.42	45.12	0.46	23.37	40.61	-9.89	31.06	19.78	38.79	24.58	21.81	50.78	12.58	66.2	25.06
BRD-K24132293	piperlongumine	Glutathione transferase inhibitor			Glutathione transferase inhibitor	-0.03	6.52	3.03	81.96	-60.97	-11.77	84.36	12.29	70.34	-1.9	90.56	87.37	0.15	2.36	68.41	75.5	64.71	5.18	88.05	59.48	75.76	77.23	-1.64	82.9	77.13	43.68	88.1	57.53	1.27	40.15	-7.12	1.56	0	-1.03	1.27	75.81	72.39	90.98	52.43	70.76	57.6	85.14	58.53	66.18
BRD-A25576662	streptozotocin	DNA alkylating agent		SLC2A2	DNA alkylating agent	0	0	0	0	-9.69	-11.7	-20.99	-27.82	-9.26	-20.4	-40.23	0	-34.64	-30.45	-25.24	-6.31	-16.85	-11.7	-7.85	18.71	-19.26	0	-5.74	-22.85	43.66	-51.35	-14.83	-7.05	-13.71	-34.69	-43.77	-39.51	-6.34	-34.44	-36.97	45.88	6.69	-22.43	13.31	-24.84	-44.82	-15.42	47.3	-29.18
BRD-K10136726	tosyllysyl-chloromethyl-ketone	Chymotrypsin inhibitor			Chymotrypsin inhibitor	0	-3.99	0	-21.24	-10.42	-11.7	-0.74	5	21.31	0.7	-3.88	21.94	-5.88	42.88	7.96	2.77	45.36	41.75	-14.09	34.5	7.76	-18.84	64.55	24.62	7.06	8.08	13	-6.16	-5.04	9.59	0.99	0	9.93	44.47	14.96	6.46	10.88	23.92	3.98	30.86	-40.88	21.8	36.04	10.79
BRD-A65615053	zacopride	Serotonin receptor antagonist		HTR3A, HTR4, HTR3B, HTR5A	Serotonin receptor antagonist	-4.84	-47.32	-4.97	-32.74	0.07	-11.52	-14.28	3.95	0.78	-31.53	-33.38	-19.63	-1.82	-2.5	62.36	-51.38	-41.82	-37.75	-51.4	-18.66	-15.09	-47.43	-3.45	-52.12	-23.38	-16.81	-17.65	-53.92	-53.42	-17.44	3.35	4.22	-20.93	-35.56	8.14	-85.63	-10.66	-67.94	8.21	-19.28	-7.1	-26.6	-12.84	-10.45
BRD-K55677650	CO-101244	Ionotropic glutamate receptor antagonist		GRIN2B	Ionotropic glutamate receptor antagonist	-52.3	-65.43	-3.17	-0.78	-22.44	-11.51	-13.66	-11.88	-48.71	-3.17	-29.29	-16.37	26.51	14.75	-24.07	22.07	-20.08	-29.46	19.34	-60.6	5.74	-19.05	-6.96	0.49	-5.18	-30.9	12.19	-17.83	-6.43	18.44	-11.41	-3.59	-41.81	-1.04	7.2	4.41	22.36	-13.25	0.53	-65.28	-9.73	-74.35	-17.24	-40.3
BRD-K06024458	n-arachidonyl-GABA	cannabinoid receptor agonist			cannabinoid receptor agonist	-3.28	-72.81	-32.33	20.06	0	-11.43	-46.82	-51.42	-89.8	-13.28	-73.7	-32.55	-9.77	-5.81	-61.08	-36.4	-33.07	11.91	-59.04	-58.12	-31.15	-57.88	17.77	-28.63	-40.28	-56.81	-61.15	-67.99	-20.61	-63.75	-58.48	-52.52	-60.59	-23.71	-36.8	-43.3	-23.83	-46.98	-59.56	-45.94	-55.9	-50.97	-46.99	-53.43
BRD-A42346008	metanephrine	Epinephrine metabolite			Epinephrine metabolite	0	-22.06	0	2.01	-29.5	-11.36	13.09	-1.92	-49.13	-18.65	-53.23	27.28	0	6.47	-19.07	-7.82	-46.88	-24.37	-8.57	-30.78	4.62	-53.38	-9.09	7.12	-33.04	-31.53	-20.07	-33.35	-5.85	-60.34	-9.55	5.6	-4.22	-27.21	-9.02	-15.76	-9.95	-27.11	-24.35	-55.9	17.04	-56.97	-27.75	-44.37
BRD-K05350981	oligomycin-c	ATPase inhibitor	ATPase inhibitor, ATP synthase inhibitor	ATP5A1	ATPase inhibitor, ATP synthase inhibitor	0.25	-3.91	1.87	-0.84	-11.09	-11.27	75.35	2.23	83.01	21.96	18.21	59.35	-22.52	41.09	17.74	45.71	18.95	25.38	89.25	60.98	85.53	35.2	-7.74	38.62	7.29	83.68	11.13	22.29	83.08	88.92	26.25	26.51	-13.31	1.76	-10.18	-2.78	44.58	70.32	52.94	33.48	56.22	86.93	36.41	57.95
BRD-K23369905	oxiconazole	Bacterial cell wall synthesis inhibitor			Bacterial cell wall synthesis inhibitor	6.55	51.53	20.67	-12.8	-28.82	-11.15	66.05	13.36	33.45	-3.45	33.86	49.65	-0.52	90.65	28.93	25.7	67.93	43.06	84.24	44.69	20.94	83.07	4.57	19.41	33.73	97.15	15.53	33.25	14.27	50.98	-56.63	-0.99	40.15	14.43	8.22	28.58	45.53	27.57	14.07	-63.73	38.31	12.57	5	43.34
BRD-K35960502	niclosamide	DNA replication inhibitor		STAT3	DNA replication inhibitor, STAT inhibitor	57.38	79.08	18.03	-86.3	61.15	-11.11	86.45	43.23	73.02	0	40.27	70.32	-0.63	-1.02	24.99	75.01	16.74	0.07	81.95	81.63	83.72	23.8	-71.77	49.41	-1.76	86.27	7.86	45.17	1.2	81.64	33.89	58.01	-1.74	0.7	-1.09	30.8	53.62	76.35	54.18	56.2	59.08	77.54	21.08	41.91
BRD-A29289453	PCA-4248	Platelet activating factor receptor antagonist		PTAFR	Platelet activating factor receptor antagonist	12.86	20.47	3.38	-12.38	-13.34	-11.06	3.36	-8.11	3.6	0	-2.71	9.08	7.82	0	-10.83	-15.26	8.66	13.34	0.92	-22.19	-26.1	9.55	-33.08	-11.2	0.79	6.27	-7.87	0.78	3.7	2.08	-5.31	13.17	-2.54	-56.98	27.9	-6.73	-27.87	-18.11	-9.86	21.58	-13.96	5.24	42.95	3.38
BRD-A22707317	SB-205384	GABA receptor modulator		GABRA3, GABRA5, GABRA6	GABA receptor modulator	-2.4	-10.07	-23.79	11.63	-2.01	-11.04	-12.56	-4.4	-47.03	-8.57	-16.1	-14.38	-14.11	-10.45	-16.83	-60.2	-40.84	-17.91	-38.81	-12.41	-2.85	-17.3	-1.56	-1.44	10.31	-11.75	-35.32	-55.12	-1.66	-28.64	-1.69	6.46	0	-16.33	-17.17	-10.55	19.05	-5.4	-33.48	-8.05	-17.18	-26.01	-7.22	-11.69
BRD-K77175907	calcifediol	Vitamin D receptor agonist	Vitamin D receptor agonist	VDR	Vitamin D receptor agonist	0	29.34	1.09	-11.79	45.01	-10.86	60.38	25.8	3.03	63.22	44.89	58.49	9.55	15.45	61.58	34.8	54.54	1.97	48.23	46.24	28.07	56.04	44.13	63.23	3.21	29.43	27.7	-8.23	21.92	3.45	0	64.08	-2.03	46.38	37.57	3	33.63	38.54	23.26	-23.03	50.53	35.68	40.83	40.89
BRD-K26241953	piceatannol	SYK inhibitor		ATP5A1, ATP5B, ATP5C1, IRF3, PTGS2, SIRT1, SYK, TYR	SYK inhibitor	0	5.21	7.14	-4.79	-12.15	-10.83	17.45	-16.48	3.77	-7.12	0.42	12.87	-13.94	-1.06	-8.84	44.15	15.31	30.82	31.71	11.83	13.35	8.27	-6.09	20.67	0	34.76	34.34	1.61	8.45	12.18	7.17	35.49	0	-7.88	-19.74	-10.84	-23.29	0.35	12.04	-4.28	-29.28	-0.35	0.78	24.48
BRD-K60476892	YC-1	Guanylyl cyclase activator		HIF1A, GUCY1A2, GUCY1A3, GUCY1B3	Guanylyl cyclase activator	0	10.32	-1.8	1.87	-58.9	-10.79	-9.41	1.97	-29.85	-5.59	-25.59	-26.24	-35.21	1.66	50.23	-27.35	-85.14	-2.85	-28.01	-11.54	46.74	13.12	-7.52	-30.32	-10.5	-18.8	-7.4	-6	-32.85	8.03	2.5	-2.54	-26.94	-13.46	-14.39	31.98	-1.34	-43.04	-43.03	-27.35	-13.28	-25.98	57.04	-38.7
BRD-A78391468	prednisolone	Glucocorticoid receptor agonist	Glucocorticoid receptor agonist	NR3C1, NR3C2, SERPINA6	Glucocorticoid receptor agonist	10.29	-10.93	77.32	-44.53	-81.62	-10.69	-37.7	4.18	-41.3	-77.46	-5.18	36.66	-53.44	30.19	-61.32	-37.65	-22.94	44.19	-28.23	-33.27	-44.84	-44.4	11.3	-83.66	-10.82	-21.5	-31.39	-29.61	-48.19	-4.71	-22.51	-17.65	6.67	-56.44	-27.29	-27.2	-18.64	-9.35	-34.35	-15.65	-25.84	-44.87	13.69	-10.88
BRD-K64614248	salicin	Anti-inflammatory			Anti-inflammatory	0.14	-4.58	-0.11	-1.23	-37.38	-10.69	-32.21	-23.54	-36.62	5.23	-44.66	71.79	1.12	18.47	-21.39	-2.33	-4.3	-22.44	-22.45	-12.41	-30.33	11.93	-14.57	-2.88	-9.72	-17.2	-9.74	-2	-8.76	-15.5	-18.69	-14.97	-40.42	-26.09	3.92	3.03	-14.09	3.05	-12.22	7.47	-8.1	-47.29	-17.66	-46.72
BRD-K29582677	flunarizine	Calcium channel blocker		CACNA1G, CACNA1H, CACNA1I, CALM1, CYP2J2, HRH1	Calcium channel blocker	-21.53	-32.15	-26.15	-5.26	-18.39	-10.64	-36.79	-62.51	-60.39	-21.99	-67.23	-36.15	15.11	-9.06	-32.67	-16.62	-54.26	0.49	-69.22	-66.24	-18.12	-44.64	-15.99	-21.91	-28.48	-49.99	-32.59	-24.06	-56.15	-50.67	-55.78	-14.83	-49.82	-20.84	0	-52.03	-54.02	-33.97	-11.16	-32.62	-56.89	-74.64	-44.78	-22.04
BRD-K21971034	OM-137	Aurora kinase inhibitor	Aurora kinase inhibitor		Aurora kinase inhibitor	31.12	31.89	27.47	-15.49	-3.7	-10.64	-74.22	-20.39	-48.42	-20.7	-29.02	33.22	-31.94	0	-5.39	-73.41	-31.34	-12.02	-15.03	-21.03	-52	0	-17.83	-46.46	-13.67	-29.68	14.33	15.16	22.18	6.11	-24.77	-10.5	-13.8	-11.96	0	0	16.81	-35.61	11.9	-31.02	-12.33	-53.12	6.82	-18.01
BRD-K08219523	5-nonyloxytryptamine	Serotonin receptor agonist		HTR1B, HTR1D	Serotonin receptor agonist	36.06	78.81	68.85	-52.95	-71.55	-10.54	50.62	61.63	41.53	0	-8.16	48.85	-6.13	-24.25	16.66	39.64	49.16	3.21	76.42	63.8	61.65	-5.87	9.91	48.82	-13.04	78.16	73.88	31.38	45.58	51.53	6.48	74.82	0	29.71	49.12	13.75	58.98	68.6	67.32	56.79	71.03	77.55	57.93	53.37
BRD-K40887525	ritanserin	Serotonin receptor antagonist		HTR2A, HTR2C, HTR2B, ADRA1A, ADRA1B, ADRA1D, HTR1A, HTR1B, HTR1D, HTR5A, HTR6, HTR7	Serotonin receptor antagonist	0.28	-45.7	1.16	-4.93	-49.64	-10.49	-35.36	-26.3	-22.19	-39.2	-11.64	-8.67	-32.79	10.57	-41.21	-42.7	18.32	12.66	-45.68	-21.4	-14.62	-4.86	16.27	-8.59	-25.59	-42.78	-16.26	-22.31	-32.09	-62.44	-16.61	-26.18	-0.53	12.91	-14.44	7.29	-20.06	-58.06	-12.62	20.23	-8.64	-17.08	11.98	8.57
BRD-K72029282	probucol	Atherogenesis inhibitor		ABCA1, ABCB11, CES1	Atherogenesis inhibitor	-28.11	-14.62	-1.34	-2.01	-10.93	-10.38	-19.42	-4.03	-4.62	-42.18	13.57	-8.04	-34.65	-27.52	-47.61	-5.6	-10.4	-9.52	-58.49	-12.52	29.98	-17.43	-6.43	-19.65	-57.39	-34.7	70.6	-36.89	-9.2	-18.64	-40.66	-45.14	-50.63	-13.31	-14.18	-8.67	-6.28	-40.52	-48.2	-4.9	-21.85	-32.42	-15.72	-33.28
BRD-A62434282	goserelin	Gonadotropin releasing factor hormone receptor agonist		GNRHR, GNRH1, LHCGR	Gonadotropin releasing factor hormone receptor agonist, Luteinizing hormone releasing hormone agonist	0	-19.66	17.47	-11.91	0	-10.33	-73.99	-58.71	-31.68	-22.89	-18.81	-30.58	-90.77	14.94	-4.3	-29.1	-29.99	-44.47	-14.83	-35.65	-28.97	-53.57	-13.84	-25.58	-79.83	-52.66	-46.01	-58.33	25.27	-52.38	-35.17	3.28	-3.95	-33.03	-15.23	-41.4	11.42	-34.05	-58.56	2.23	-19.49	-24.09	-38.31	-63.67
BRD-K69328504	L-690488	Inositol monophosphatase inhibitor		IMPA1	Inositol monophosphatase inhibitor	51.34	76.11	86.94	-84.71	-26	-10.33	68.36	46.46	31.97	0	25.08	47.07	-1.02	-43.73	-1.9	28.43	39.37	76.53	31.09	74.86	17.85	8.56	52.5	40.56	52.35	87.74	56.99	75.86	11.06	74.89	-2.16	50.62	20.82	23.95	-13.19	69.86	27.41	79.64	73.85	12.25	89.03	21.44	96.51	75.5
BRD-K65503129	HSP90-inhibitor	HSP inhibitor	HSP inhibitor	HSP90AA1, HSP90AB1	HSP inhibitor	1.73	65.62	5.07	-31.26	-2.4	-10.28	43.5	1.41	77.2	-77.05	87.78	20.6	34.48	14.55	29.08	23.91	58.92	83.19	45.28	40.02	68.2	43.93	82.84	24.86	55.02	77.45	34.87	38.96	-60.21	95.04	-57.62	44.39	81.53	38.35	-1.83	16.86	78.88	25.52	43.06	2.36	65.07	92.47	49.94	65.4
BRD-K67261995	adipiodone	Contrast agent		ALB	Contrast agent	0	-53.49	0.95	0	14.05	-10.25	22.49	-2.36	-18.07	-1.73	-51.19	-53.64	-2.96	-0.32	-12.26	-39.89	-2.04	-86.18	-61.12	-53.48	-36.86	-32.98	18.14	-30.76	-52.69	-25.79	-44.58	-48.55	-7.86	-52.92	-15.27	-16.28	-1.87	-3.59	-17.01	-24.64	-10.39	-1.62	-29.55	-31.16	-13.83	-35.96	-84.15	-62.82
BRD-K62012036	acitretin	Retinoid receptor agonist	Retinoid receptor agonist	RARA, RARB, RARG, RBP1, RXRA, RXRB, RXRG, STAT3	Retinoid receptor agonist	0	-73.19	-1.99	3.28	0	-10.21	-34.92	2.82	-81.94	50.9	-44.63	-74.46	34.32	-11.67	-40.66	-82.52	-38.14	38.88	-77.43	-58.15	-56.98	-50.91	-3.28	9.1	-79.75	-72.98	-58.86	-26.78	30.59	-96.62	7.46	-42.73	-2.81	7.98	0	-74.58	31.69	-53.84	-46.32	-3.39	-87.7	-39.19	-34.36	-62.41
BRD-K60690191	MPEP	Glutamate receptor antagonist		GRM5, GRM1, GRM4	Glutamate receptor antagonist	56.17	33.07	0	-54.86	-4.48	-10.18	58.9	-14.37	7.2	-58.58	-7.26	-39.95	-16.65	21.58	44.69	-6.51	47.07	-5.85	-44.85	32.93	-51.37	-21.62	0	13.81	-39.94	51.2	12.17	-48.87	15.85	45.95	-52.71	-34.19	-14.15	34.91	13.19	-5.6	43.93	-6.81	0	6.09	47.23	-20.8	57.34	-39.45
BRD-K67844266	MLN-4924	Nedd activating enzyme inhibitor		NAE1, UBA3	Nedd activating enzyme inhibitor	2.52	-18.58	-1.55	17.32	-0.49	-10.1	79.11	51.74	20.2	-1.2	34.18	9.26	56.46	-31.46	1.48	90.88	-11.44	27.64	86.37	31.75	58.28	-13.19	82.61	28.21	-8.36	-72.91	-18.85	47.05	-91.82	3.88	-4.46	18.32	-37.3	0	-53.38	-4.97	-20.77	-35.37	3.59	-8.27	-30.61	22.35	21.44	-15.78
BRD-K72034655	peucedanin	Apoptosis stimulant			Apoptosis stimulant	1.75	28.18	1.39	-1.57	70.4	-10.08	-45.04	20.44	-37.29	25.75	-30	-26.93	28.06	47.96	9.06	-45.52	-14.13	33.32	-84.95	-60.45	10.56	-23.78	42.73	-63.02	-31.61	-31.11	31.1	-69.66	1.43	-38	22.19	-25.86	-17.01	72.99	15.63	28.95	31.21	-13.3	-21.43	-59.88	-13.36	-37.13	-55.85	-8.26
BRD-A50157456	terbutaline	Adrenergic receptor agonist	Beta-adrenergic receptor agonist	ADRB2	Adrenergic receptor agonist	-12.93	-77.23	-62.09	14.39	7.19	-10.05	-31.69	-39.27	-19.19	0	-79.39	-65.19	13.72	-58.67	-48.68	-70.46	-31.91	0	-54.41	-22.15	-50.47	-27.86	-34.84	-40.51	-63.14	-33.35	-69.36	-51.15	0	-15.65	-54.59	0	-23.25	-28.97	5.93	-62.49	-34.3	-71.22	-32.6	-42.33	-88.6	-89.95	-55.94	-83.66
BRD-A73368467	fexofenadine	Histamine receptor antagonist		HRH1	Histamine receptor antagonist	3.4	5.56	1.06	6.08	14.38	-10.01	-3.84	-40.81	10.61	-0.85	16.18	27.79	-1.13	23.67	-21.23	2.96	7.35	48.42	12.56	-14.08	1.97	8.89	4.09	9.77	7.34	-24.8	-16.08	-1.08	1.09	6.11	-24.58	-40.39	8.8	5.29	15.14	-23.52	-6.27	4.86	21	-50.74	-14.01	-8.39	19.28	10.89
BRD-A80641450	FR-139317	Endothelin receptor antagonist		EDNRA	Endothelin receptor antagonist	0	-8.45	-1.16	0	16.9	-10	10.46	1.41	-9.34	-17.16	-5.56	10.18	-1.52	-15.56	11.36	-23.49	-10.82	1.16	-45.57	-5.96	1.37	-16.78	5.41	-10.14	21.53	-4.1	-41.65	-27.55	1.94	13.65	11.28	-1.45	1.83	25.61	9.42	-10.58	12.68	6.32	12.96	1.06	-39.55	-17.36	-17.63	4.16
BRD-A22713669	BVT-948	Tyrosine phosphatase inhibitor		PTPN1, PTPN11, PTPN2	Tyrosine phosphatase inhibitor	51.72	89.24	34	-59.48	7.12	-10	79.08	56.1	58.13	-12.11	44.29	76.85	6.92	71.56	82.35	71.11	52.71	23.92	90.39	69.92	42.24	80.67	-49.34	86.26	33.7	69.94	91.28	83.48	31.61	86.86	66.66	77.05	0	43.7	84.49	84.04	87.33	80.19	86.98	14.99	67.68	84.96	74.83	64.19
BRD-A94413429	NTNCB	Neuropeptide receptor antagonist		NPY5R	Neuropeptide receptor antagonist	-8.36	60.78	34.85	-26.87	-20.29	-10	-43.42	13.74	37.9	-5.69	36.27	14.72	-42.78	-59.26	14.72	62.2	55.46	81.19	70.93	71.55	86.19	-16.31	2.36	75.85	47.49	78.91	42.02	-66	10.16	79.28	-1.52	43.27	-48.66	22.85	1.76	20.9	-18.52	36.79	66.1	22.36	54.97	80.3	82.88	51.88
BRD-A34255068	rolipram	Phosphodiesterase inhibitor		PDE4A, PDE4B, PDE4D, PDE4C, PDE5A	Phosphodiesterase inhibitor, Interleukin receptor antagonist	-3.73	-93.92	-7.97	-0.49	0	-9.94	-30.33	0.21	-56.43	0.49	-78.2	-6.54	-6.99	-20.93	-29.15	-34.66	-9.28	-6.45	-46.72	-62	-6	-33.97	8.9	-50	-17.93	-26.04	-51.3	-61.53	1.86	-89.54	-17.5	-31.4	-1.3	-6.99	-1.1	-26.01	-14.57	-60.69	-3.92	21.92	-28.07	-92.87	-0.88	-25.69
BRD-K50866992	tropisetron	Serotonin receptor antagonist		HTR3A, GLRA1, GLRA2, GLRB, HTR4	Serotonin receptor antagonist	0	33.14	0	-2.54	-5.86	-9.88	-21.68	-25.13	-22.36	15.08	-28.93	-8.32	-11.84	-65.97	-33.6	-11.57	-24.45	26.37	-9.54	58.55	-52.84	-46.4	24.07	-50.18	15.79	51.82	26.76	18.79	-63.21	15.3	-72.84	26.23	1.87	-8.57	9.01	-15.41	43.18	-40.26	17.14	-80.35	-16.73	-16.55	39.57	82.73
BRD-A79672927	tropicamide	Acetylcholine receptor antagonist		CHRM3, CHRM4, CHRM1, CHRM2	Acetylcholine receptor antagonist	1.73	8.03	-7.03	4.76	-19.36	-9.87	10.31	2.26	-3.14	-1.8	-24.46	6.73	-0.74	18.65	-7.89	-18.59	5.11	-6.36	-30.91	9.46	-14.97	-49.67	-2.27	-48.98	3.33	5.7	-1.88	-27.28	6.36	-37.88	-26.13	-12.91	5.96	13.38	11.26	17.01	-5.11	8.29	1.45	5.69	-4.72	1.69	11.36	22.63
BRD-K91336023	mesulergine	Dopamine receptor agonist		HTR2A, HTR2C, HTR7, HTR2B, HTR3A, HTR3B, HTR6	Dopamine receptor agonist	-1.27	-38.97	-16.47	6.47	-5.3	-9.82	-5.23	0.46	6.96	-24.26	-34.04	-3.1	-23.31	-4.3	0	-3.59	-12.83	4.72	-31.43	-21.08	-38.62	-4.69	-3.34	-14.02	-24.24	-2.97	-13.29	-12.05	-4.36	-7.01	-5.06	-45.05	-17.45	2.01	8.51	-32.01	0.74	-7.45	-21.51	-8.19	-10.9	-6.24	5.66	1.87
BRD-K86873305	piperacillin	Bacterial cell wall synthesis inhibitor			Bacterial cell wall synthesis inhibitor	4.76	9.02	7.53	0	18.78	-9.58	26.51	0	27.85	6.55	24	-28.29	-13.18	34.36	-20.52	-14.06	-47.02	-25.44	-14.06	-59.53	-84.83	-14.88	21.16	-9.64	-6.88	0	-30.86	-17.76	6.31	-47.79	33.02	-10.82	-47.37	11.51	-17.26	6.92	-37.11	8.76	6.41	72.05	5.11	-74.81	-81.33	-17.79
BRD-K32710582	EI-247	IGF-1 inhibitor		INSR	IGF-1 inhibitor	0	-11.11	0	2.4	-9.4	-9.56	32.43	2.29	35.19	-6.2	23.59	11.13	1.73	5.71	20.94	-55.21	10.3	77.63	-10.08	13.92	18.57	23.9	54.17	-1.9	-14.92	54.28	14.1	45.51	73.37	-11.41	-6.62	-2.28	20.71	28.77	40.19	19.23	73.85	53.49	63.84	30.54	13.23	-14.89	60.21	8.43
BRD-K88871508	lisuride	Dopamine receptor agonist		DRD2, HTR2B, HTR2C, ADRA2A, ADRA2B, ADRA2C, DRD1, DRD3, DRD4, DRD5, HTR1A, HTR1B, HTR1D, HTR2A, ADRA1A, HRH1, HTR6	Dopamine receptor agonist	0	-1.48	1.79	-11	-11.45	-9.53	-5.36	-0.49	-5.06	-40.19	-7.55	18.64	-36.4	-7.19	-5.38	-21.42	-27.69	-17.84	-9.12	-23.91	-0.7	-6.35	0	-27.75	25.4	-23.22	-32.53	-25.47	-19.27	-7.35	-8.69	0	-62.9	-0.49	-18.21	17.91	0.53	-9.25	-9.09	8.88	-20.37	-27.49	7.72	-14.33
BRD-A32836748	leu-enkephalin	Opioid receptor agonist		OPRD1, OPRM1	Opioid receptor agonist	-2.4	-22.46	-7.91	-42.92	33.73	-9.49	-33.66	35.46	10.65	-30.76	-60.2	-80.05	62.08	-62.33	-80.14	-57.21	48.42	-40.37	-93.78	11.84	-82.16	-75.15	-27.5	-22.33	-48.39	-35.76	-19.86	-19.11	-19.6	-73.31	-32.72	-3	65.33	43.75	7.98	-39.58	-22.62	-58.47	-31.88	23.35	-50.94	20.29	-62.15	22.14
BRD-K44084986	Y-27632	Rho associated kinase inhibitor	Rho associated kinase inhibitor	ROCK1, ROCK2, LRRK2, PKIA, PKN2, PRKACA, PRKCE	Rho associated kinase inhibitor	0	-2.77	-3.14	-16.43	-28.33	-9.39	-7.36	-10.18	-23.39	-22.55	-50.65	-8.1	16.97	-3.6	-45.27	-44.33	11.41	44.07	-36.82	-9.3	-27.86	-19.66	10.31	-9.74	-33.73	6.14	-20.51	-50.64	5.14	-46.4	-60.66	-56.78	2.27	4.74	-2.15	-0.9	-14.03	-5.74	-41.09	-56.63	0.99	-4.59	29.47	-28.05
BRD-K79684402	RO-10-5824	Dopamine receptor agonist		DRD4	Dopamine receptor agonist	0	4.37	0	22.97	-15.17	-9.34	-20.28	11.22	-32.31	23.13	-14.76	-19.42	-16.66	26.46	20.78	-2.89	-39.52	26.48	5.28	-30.14	62.32	-7.47	24.44	32.15	-15.16	27.14	-25.97	-7.54	-13.7	-37.64	-2.4	1.13	-1.66	-14.66	28.88	19.06	17.54	-22.83	7.49	36.06	-32.74	-10.42	60.82	-64.57
BRD-A21723284	naltriben	Opioid receptor antagonist		OPRD1, OPRK1, OPRM1	Opioid receptor antagonist	-16.69	-40.47	-51.46	5.58	-1.34	-9.28	-27.87	-0.92	-47.3	0	-84.95	-28.13	-15.06	-20.94	-22.39	-7.35	-17.43	13.16	-35.77	-50.88	-9.28	-33.3	17.37	-12.28	-34.07	-31.41	-25.87	-68.55	-21.15	-53.34	-16.71	-41.48	-0.92	-5.95	0	-3.56	-15.08	-16.7	-43.37	-31.08	-9.91	-13.97	1.34	-63.3
BRD-K67080878	milrinone	Phosphodiesterase inhibitor		PDE3A, PDE2A, PDE3B, PDE5A	Phosphodiesterase inhibitor	-0.56	-10.69	-0.21	0.74	-2.68	-9.23	-31.98	-1.09	-32.34	-63.18	-16.91	-31.88	-15.84	22.22	-32.78	-20.94	-25.76	-21.68	-31.76	-86.09	20.27	-12.61	14.41	-53.71	-26.33	-61.87	-70.99	-27.43	26.99	-67.85	-27.98	-5.74	-56.45	3.24	-13.78	-54.35	33.47	-37.02	-19.05	-1.09	-63.77	-85.6	-27.28	-70.5
BRD-K41713976	E-4031	Potassium channel blocker		KCNH2, KCNH1	Potassium channel blocker	0.02	-2.57	0.02	-0.21	-6.31	-9.22	11.97	-6.44	9.76	1.87	-4.9	19.63	2.18	33.64	3.24	7.38	2.54	7.96	15.56	8.19	-0.78	2.84	29.6	19.18	9.3	20.28	5.57	10.82	-11.3	-49.65	-6.53	-10.16	3.38	15.71	-6.47	19.14	-3.31	-44.12	16.43	30.57	-47.35	6	15.17	13.98
BRD-K21672174	RO-28-1675	Glucokinase activator		GCK	Glucokinase activator	46.01	21.41	30.44	-1.39	-20.56	-9.2	91.75	34.71	32.07	-0.49	4.76	22.6	-12.73	0.46	-13.28	9.23	37.55	22.9	78.36	49.82	31.34	11.42	-78.37	8.31	-16.07	52.12	29.74	72.97	0.85	41.59	0	67.55	-16.65	10.3	0	4.01	66.5	8.12	0.85	-26.85	7.09	52.71	67.55	47.88
BRD-K40919711	BAPTA-AM	Potassium channel blocker		KCNA3, KCNA5, KCNH2	Potassium channel blocker	-5.12	20.69	0.78	-0.46	0	-9.16	50.55	2.78	2.02	-0.99	-1.94	2.75	-6.19	-77.78	-1.06	27.3	0.88	-6.66	19.6	23.72	2.26	-1.28	-3.25	14.04	-20.59	25.42	-1.97	45.43	-0.95	10.5	-6.45	26.13	-0.7	-18.09	0	-5.7	-5.25	15	-11.39	-0.63	-4.1	2.78	2.26	9.41
BRD-A95939040	sertaconazole	Sterol demethylase inhibitor			Sterol demethylase inhibitor	0.04	-4.83	69.35	-14.66	-13.38	-9.11	-15.99	-55.8	-23.06	-8.49	-63.43	-19.68	-1.29	-23.21	-32.34	-25.66	-0.61	-9.98	-13.65	-43.67	-16.07	-6.78	-0.66	-15.92	-55.11	-20.16	-33.55	-26.87	-20.33	-8.23	-35.63	-32.84	-26.24	-2.14	-1.08	-16.42	-4.52	-22.04	-12.3	-31.11	-32.44	-30.06	-17.87	-16.31
BRD-K54529596	captopril	ACE inhibitor		ACE, LTA4H, MMP2, MMP9	ACE inhibitor	1.37	-90.88	2.01	0	-9.51	-9.09	31.59	-58.28	-15.33	4.82	-47.34	-49.61	0	-32.7	-42.68	-61.86	-28.3	14.06	-73.02	-53.67	-19.55	-22.98	15.38	-74.15	-70.65	-79.81	-85.97	-10.93	-12.73	-77.49	-58.21	-19.9	0	-28.21	-11.17	-25.35	2.36	-35.39	-2.29	29.04	-47.86	-82.04	-44.61	-87.98
BRD-K34415467	trimethobenzamide	Histamine receptor antagonist		DRD2	Histamine receptor antagonist	-0.49	-22.31	-2.61	-6.63	-38.86	-9.08	19.31	-59.65	-7.86	-34.33	-10.79	-22.65	-3.77	2.43	-51.08	-75.11	-16.07	-42.52	5.38	-93.38	-54.8	-4.86	-16.27	-3.42	-32.59	3.84	-48.36	-57.78	-0.67	-48.34	-9.57	-1.2	-77.5	-45.3	-33.12	-11.85	-17.95	-58.89	-71.01	-3.59	-30.29	-25.05	-48.93	-69.22
BRD-K19295594	gossypol	BCL inhibitor	BCL inhibitor	BCL2, BCL2L1, MCL1, BCL2L2, CTGF, EGF	BCL inhibitor, MCL1 inhibitor	-0.39	9.53	0	-38.83	4.01	-9.06	72.59	30.05	11.03	1.23	-24.65	22.05	-13.97	2.11	14.97	57.14	29.13	-31.39	36.87	81.43	26.18	30.17	-1.3	57.17	-44.2	71.18	-2.33	73.33	3.7	77.42	-2.49	90.61	-0.78	-51.67	-11.64	19.69	9.39	16.03	-15.94	12.43	15.58	53.1	40.73	54.88
BRD-K49519092	immethridine	Histamine receptor agonist		HRH3	Histamine receptor agonist	-1.02	-33.13	-0.18	1.04	-9.42	-9.04	-57.35	-39.42	-75.46	-55.99	-54.24	-70.86	-0.6	-10.01	-19.04	-33.15	-68.42	-44.65	-52.02	-65.96	-40.43	-26.11	-26.05	-61.39	-56.62	-83.94	-74.09	-68.28	-16.87	-83.57	-68.16	0	-36.09	-66.61	9.29	-43.69	-11.51	-84.1	-69.69	-36.58	-77.45	-70.59	-53.09	-59.14
BRD-A96485169	EBPC	Aldose reductase inhibitor		AKR1B1	Aldose reductase inhibitor	1.02	-0.63	-5.74	1.27	31.45	-9.01	8.53	6.91	21.08	20.86	-43.01	10.82	-32.75	15.97	-1.02	-12.08	2.64	4.44	-21.1	4.58	31.11	-5.65	-1.02	18.29	-14.91	1.35	-6.58	-8.51	11.31	8.24	12.05	-21.29	-1.48	-0.99	3.66	-4.33	17.51	4.06	9.59	9.28	-11.61	-16.3	-20.81	22.33
BRD-A12560204	nitrendipine	Calcium channel blocker	Calcium channel blocker	CACNA1C, CACNA1D, CACNA2D1, CACNA1H, CACNA1S, CACNA2D2, CACNB2, CACNG1, KCNN4	Calcium channel blocker	0	6.81	0	0	1.16	-8.93	83.4	61.24	80.3	11.55	31.86	66.47	-0.4	71.54	-14.64	29.46	55.54	64.02	40.27	49.74	80.29	21.1	1.4	64.08	9.53	74.67	31.91	17.93	68.65	48.3	82.47	35.96	5.24	34.39	31.29	57.9	44.12	15.38	52.41	66.79	35.71	28.87	20.91	33.07
BRD-K40227168	vinburnine	Adrenergic receptor antagonist		CHRM1, CHRM2, CHRM3, CHRM4	Adrenergic receptor antagonist	-2.15	-69.12	-5.3	-25.16	36.96	-8.91	-77.37	0	-43.23	-27.69	-55.67	-17.45	-25.15	-18.59	-59.81	-87.54	-12.59	-21.74	-33.91	-47.09	-6.18	-67.78	-24.54	-17.95	-42.92	-29.83	-69.79	-35.89	-91.69	-35.11	-44.95	-50.28	0	24.98	32.91	-27.94	-32.16	-37.49	-14.9	-25.5	-78.75	-23.75	-20.08	-34.93
BRD-K46142322	RS-67333	Serotonin receptor partial agonist		HTR4	Serotonin receptor partial agonist	0	-0.53	0.6	-14.28	-0.74	-8.87	-3.98	-28.81	-13.29	-32.64	-56.5	-36.66	-29.55	-53.74	-68.49	-31.94	-19.62	-14.48	-48.55	-62.45	-5.03	-5.1	-26.72	-65.64	-56.41	-30.12	-28.15	-26.2	-24.13	-25.16	-29.8	-38.84	-59.03	-54.47	-29.73	-53.71	-18.61	-48.92	-9.44	-6.96	-23.59	-21.21	-17.02	-47.56
BRD-K05151076	ZK-164015	Estrogen receptor antagonist	Estrogen receptor antagonist	ESR1, ESR2	Estrogen receptor antagonist	0	71.18	0	-45.47	-23.21	-8.86	58.18	61.48	44.8	22.51	-24.7	35.59	1.41	1.44	8.37	72.66	55.07	30.48	40.2	62.54	56.79	32.56	-9.74	44.07	-6.16	63.67	14.05	23.35	11.1	60.98	-36.67	56.02	-8.07	1.97	31.38	13.74	63.49	48.58	34.84	-31.6	40.51	1.52	1.69	40.68
BRD-A38030642	cyclosporin-a	Calcineurin inhibitor		PPIA, ABCB11, CAMLG, CYP3A5, CYP3A7, FPR1, PPID, PPIF, PPP3CA, PPP3R2, SLC10A1, SLCO1B1, SLCO1B3	Calcineurin inhibitor	-0.03	40.07	2.54	-3.17	0.56	-8.84	89.44	6.36	35.55	-2.13	26.38	44.43	-3.56	0.67	20.48	0.63	32.81	6.4	59.77	21.73	85.82	-29.42	-74.22	19.22	-49.49	63.43	-25.46	-7.42	8.29	64.71	-2.57	8.23	-55.55	-48.9	-33.29	4.97	67.85	56.88	-4.49	12.65	-56.18	43.53	-23.79	39.96
BRD-A38747044	KU-14R	Imidazoline receptor ligand			Imidazoline receptor ligand, Putative I3 antagonist	-2.57	-50.68	-2.36	21.77	-4.72	-8.81	6.77	-3.96	-13.64	-8.46	41.39	2.57	27.57	-2.57	-13.38	-3.88	3.95	-1.34	-28.75	-37.24	-20.13	-16.84	21.97	4.8	-20.5	-27.16	10.85	-47.45	1.87	-10.08	-26.9	-10.64	-2.78	-4.51	-14.38	-34.39	-15.69	-13	-21.87	-7.5	9.66	-23.38	-15.26	2.11
BRD-K46137903	prednicarbate	Phospholipase activator	Glucocorticoid receptor agonist	NR3C1, PLA2G1B	Phospholipase activator	1.9	5.27	5.79	-4.92	-9.43	-8.8	33.79	5.09	32.08	-17.98	-2.3	40.13	-15.65	3.28	3.84	-13.71	13.37	26.19	-4.38	16.61	-8.48	4	7.15	6.01	0.25	14.89	30.4	3.91	0.81	46.7	-17.78	-23.34	7.57	13.27	20.96	2.43	37.49	40.94	30.94	4.3	32.13	11.38	42.22	28.61
BRD-A20968261	WAY-213613	Glutamate inhibitor		SLC1A2	Glutamate inhibitor	-2.68	-4.12	-16.4	1.19	-2.71	-8.71	-27.9	-19.73	25.64	26.79	-34.83	-17.99	21.59	-20.5	-16.13	-49.34	-6.49	-23.97	-45.21	-49.06	-63.27	-42.12	2.75	-29.05	-38.69	-53.53	-41.99	-39.23	-8.81	-27.17	73.17	-2.82	20.17	-23.45	-29.25	-16.75	-34.04	-24.27	-2.08	-18.19	39.32	-3.49	4.05	16.46
BRD-K52930707	rescinnamine	ACE inhibitor		ACE	ACE inhibitor	0	-7.15	0.39	-10.23	-7.62	-8.7	-55.56	-0.72	-42.05	0	-11.8	4.61	-0.35	-0.95	3.66	-2.27	-8.59	-21.79	-10.23	-30.71	-17.51	-10.6	-7.17	-15.74	-14.66	-10.18	-34.58	-28.21	-10.28	-17.9	-0.84	-23.82	-43.42	-39.67	-12.21	9.56	-6.31	-17.23	0.7	-37.78	2.5	-8.12	7.89	-10.18
BRD-K31054881	BMY-7378	Adrenergic receptor antagonist		HTR1A, ADRA1D, ADRA1A, ADRA1B	Adrenergic receptor antagonist, Serotonin receptor antagonist	-19.89	-35.12	-1.16	1.09	-1.3	-8.68	-22.55	-15.55	-15.37	36.18	21.16	13.62	-32.48	24.49	53.68	-15.03	-46.34	18.94	-18.71	49.02	1.88	31.28	-6.31	29.03	-18.78	-46.63	-39.43	-13.09	-9.53	-33.78	-53.34	45.57	24.04	31.98	-2.61	-17.75	-12.26	-38.25	-49.59	-50.64	49.37	-51.96	25.22	28.21
BRD-A72596465	GW-6471	PPAR receptor antagonist		PPARA	PPAR receptor antagonist	0	60.56	1.52	-11.73	0.85	-8.64	32.61	19.75	35.04	37.27	-0.95	41.82	-32.84	-11.34	-0.92	-4.77	19.42	34.23	28.69	-7.02	25.33	16.98	12.18	10.84	63.62	3.03	25.33	-9.61	18.45	-4.02	-5.11	9.48	-1.3	-0.95	-6.32	23.52	-23	-1.83	6.69	1.3	-34.43	2.18	28.53	5.09
BRD-K27871032	lysergol	Ergoline alkaloid		HTR1B, HTR1D, HTR1E	Ergoline alkaloid	0	-20.41	-1.55	-1.23	0.89	-8.55	5.85	-7.97	-2.64	4.3	-17.36	32.53	-42.69	-2.15	-2.01	-2.01	0	16.73	-17.4	-7.5	14.29	-5.42	16.99	7.8	-5.83	-9.29	-19.61	-30.61	15.1	-22.88	7.78	6.13	-10.12	-1.8	-0.74	-1.55	-47.94	2.98	-11.24	-3.38	-33.32	-24.17	-14.39	-19.2
BRD-K08806317	timolol	Adrenergic receptor antagonist		ADRB2, ADRB1	Adrenergic receptor antagonist	0.02	-31.5	-0.21	-0.74	5.8	-8.48	-35.49	-14.11	-82.9	-36.21	-40.37	-6.2	-26.03	-14.21	-90.74	-59.2	-92.45	-16.68	-74.76	-72.82	-37.33	-46.05	-21.89	-67.08	-63.43	-72	-68.96	-30.99	-9.16	-81	-87.02	-9.09	-12.34	-90.17	-27.72	-89.9	-31.69	-60.14	-14.57	-11.22	-96.72	-93.34	-92.56	-47.88
BRD-A41112154	oleanolic-acid	G protein-coupled receptor agonist			G protein-coupled receptor agonist	-19.82	24.47	-41.18	0	-0.71	-8.48	12.37	-1.75	18.41	19.88	-24.14	58.54	20.19	-42.06	49.88	40.4	76.92	73.44	0.55	4.98	29.73	10.46	66.31	18.53	5.79	-6.15	-32.46	-47.29	64.28	1.25	-29.18	19.88	50.22	64.94	61.11	34.02	58.99	44.12	31.88	68.25	17.07	26.23	19.87	53.98
BRD-A81795050	U-18666A	Oxidosqualene cyclase inhibitor			Oxidosqualene cyclase inhibitor	-3.21	20.11	0.99	-72.31	-35.48	-8.46	-11.7	0	-5.64	-3.43	3.61	5.54	-16.52	-64.76	-0.56	-6.38	28.13	41.2	3.21	-5.02	0.56	-36.01	0.99	6.99	-2.15	-13.78	11.68	-14.08	-20.69	-3.49	0.78	8.47	-9.7	-1.3	-0.74	-3.91	-16.79	15.48	8.68	9.34	40.68	-2.98	18.06	11.48
BRD-A97739905	ketoprofen	Cyclooxygenase inhibitor		PTGS2, PTGS1, CXCR1, SLC5A8	Cyclooxygenase inhibitor	1.55	19.56	1.62	1.27	-6.69	-8.44	-33.24	34.05	-21.07	-18.88	-7.66	-6.63	-0.6	37.49	35.81	-8.03	-33.51	19.18	-22.25	51.12	12.44	-66.05	-8.06	-44.5	16.3	18.94	82.25	3.59	-4.65	17.29	2.54	44.59	37.29	2.75	17.04	49.97	3.07	22.19	57.79	8.79	21.74	3.91	-2.61	40.25
BRD-K64310881	MW-STK33-3B	Potassium channel activator			Potassium channel activator	3.14	-12.93	0	-12.39	0	-8.43	-59.49	-20.57	-17.84	0	-3.28	-16.51	-21.62	-7.15	-6.69	21.61	-17.68	8.04	9.83	-12.04	-25.99	3.07	-5.71	-5.76	0	-27.67	-21.01	7.83	0	-45.03	27.05	-6.37	-28.86	-17.79	0	23.65	16.98	6.59	-6.85	-9.75	-23.79	-53.01	-8.91	-62.61
BRD-K62200014	anagrelide	Phosphodiesterase inhibitor		PDE3A	Phosphodiesterase inhibitor	0	6.62	0.02	-2.29	-18.54	-8.43	1.94	-3.98	-14.92	-3.07	-33.91	11.06	0.85	25.95	27.09	-15.01	1.97	35.77	-20.71	15.97	-53.36	-36.61	1.55	4.27	-25.95	13.41	-30.32	42.04	2.86	-22.96	22.28	-8.46	-7.09	66.92	-38.61	11.04	0.07	-21.6	1.94	-13.67	3.42	-8.02	34.73	3.03
BRD-K32645441	dipropyl-5ct	Serotonin receptor agonist		HTR1B, HTR1D, HTR1F, HTR7	Serotonin receptor agonist	-0.25	-30.1	-4.98	-0.35	37.9	-8.29	-14.21	10.18	8.27	-1.02	7.14	2.98	0.39	1.67	7.6	-24.19	-28.33	-11.81	-23.59	3.05	-62.62	-17.89	-0.25	-0.86	0.92	-18.82	-8.86	41.38	14.7	-10.37	0.46	25.37	-0.53	-8.54	-4.5	-37.53	-5.23	-13.04	-9.67	4.7	3.93	-19.71	-22.37	-4.28
BRD-A54490543	pirlindole	Monoamine oxidase inhibitor		MAOA, SLC6A2, SLC6A4	Monoamine oxidase inhibitor	-2.47	3.58	-10.89	-16.08	-22.23	-8.27	-23.77	-11.93	-35.53	-26.29	-58.88	1.47	1.82	-4.08	19.92	-89.02	-6.08	28	8.42	-29.32	16.76	7.19	15.73	-18.45	39.26	11.44	-3.66	-46.19	-37.68	11.8	-9.47	-11.74	-63.69	10.71	17.62	23.02	13.88	17.77	4.7	13.51	17.06	-11.31	-11	15.65
BRD-K46441700	GR-55562	Serotonin receptor antagonist	Serotonin receptor antagonist	HTR1B, HTR1D	Serotonin receptor antagonist	1.06	13.56	0.81	-1.55	-1.44	-8.22	-1.66	-3.56	14.76	-50.99	-50.94	-16.84	-7.18	-79.49	-25.03	-25.74	-5.58	-8.39	-14.97	-64.1	12.58	-54.64	-31.18	21.06	4.61	-3.71	-23.72	-27.31	-36.77	23.01	-25.13	15.07	-23.71	-22.29	-28.95	-0.85	-22.16	24.32	14.32	-14.49	14.18	38.87	-7.14	1.69
BRD-K18523449	mestanolone	Androgenic steroid	Androgen receptor modulator		Androgenic steroid	-1.6	-2.04	0.11	2.18	-17.64	-8.17	34.76	0.1	5.84	0.14	-2.83	3.03	-18.66	5.43	18.74	18.11	21.51	-19.62	12.35	-27.25	71.21	37.18	-7.4	51.98	-16.34	57.65	-6.41	18.29	59.07	8.63	-14.15	14.69	12.04	-20.96	5.69	-36.19	4.83	24.41	-5.75	80.73	6.03	23.03	22	-5.17
BRD-K18316707	O-1918	Cannabinoid receptor antagonist			Cannabinoid receptor antagonist	-3.1	-32.62	-9.73	0.95	-1.16	-8.08	-54.14	48.59	-26.02	32.73	53.41	-12.18	-6.62	47.83	54.1	-1.3	24.85	-14.41	-23.56	48.54	-17.49	72.92	-7.05	-1.66	-40.03	-8.65	-45.14	53.12	0.7	-8.03	-27.27	-25.89	39.79	53.77	6.76	39.82	6.92	-49.63	-30.15	13.27	41.73	-7.79	-47.36	49.73
BRD-K82865713	prostaglandin-b2	cAMP inhibitor			cAMP inhibitor	0	-5.43	0	21.27	11.42	-8.03	-20.81	-4.21	-6.43	-1.62	-13.97	-20.56	-48.34	-4.72	-4.84	3.03	-6.8	-4.42	-9.98	-8.9	5.1	3.95	-0.53	-11.69	-10.15	-6.07	-7.1	-1.66	8	-7.29	-2.47	9.69	0	-13.12	0.7	10.43	0.53	-3.67	-3.72	0.53	-29.53	-31.34	-20.74	-25.17
BRD-A29731977	17-hydroxyprogesterone-caproate	progesterone receptor agonist	Progesterone receptor agonist	CYP1A2, CYP2B6, CYP3A5, PGR	progesterone receptor agonist	0	-7.37	-60.33	0	0	-8.01	-47.44	-28.27	-60.41	-78.12	-55.09	-33.39	-6.19	-45.09	-7.72	-52.69	-95.52	-30.26	-36.57	-85.49	-19.33	-60.67	-5.04	-80.63	-79.92	-89.99	-60.7	-72.84	-21.2	-73.88	-93.75	16.86	-7.72	-76.04	-22.36	-70.08	62.93	-61.74	-76.45	-87.97	-27.9	-53.32	-82.73	-89.71
BRD-A25004090	erastin	Ion channel antagonist		VDAC2	Ion channel antagonist	-3.04	-5.25	-11.81	7.34	3.12	-7.91	-18.82	-0.7	-10.66	0.67	-14.98	5.54	-1.16	2.64	-22.97	-0.78	-13.05	16.84	-5.62	-25.23	-8.51	-18.16	18.94	-16.82	-15.4	2.29	-14.46	-92.22	4.18	-12.87	4.97	-0.78	-23.6	-23.21	1.86	-7.8	-10.18	-49.27	-47.78	-7.35	-16.81	-13.65	-1.34	-7.3
BRD-A18043272	phensuximide	Succinimide antiepileptic			Succinimide antiepileptic	-1.44	-72.77	-64.47	21.53	-12.3	-7.9	-77.96	-73.16	-69.04	-2.98	-49.3	-16.59	-5.21	-21.59	-89.75	-54.85	-89.21	-55.37	-82.17	-92.67	-82.68	-49.27	-47.2	-84.04	-53.51	-65.35	-72.85	-85.38	-24	-82.03	-78.32	-71.96	-5	-84.28	-56.4	-92.09	-48.53	-80.4	-74.91	-62.61	-61.36	-24.62	-55.71	-94.43
BRD-K40892394	AR-C133057XX	Nitric oxide synthase inhibitor		NOS2, NOS1	Nitric oxide synthase inhibitor	-4.64	-72.6	-13.67	1.27	22.03	-7.86	-66.3	-43.31	-68.85	-15	-95.04	-82.94	-6.07	-21.41	-58.74	-79.36	-67.49	-50.32	-78.06	-95.14	-76.36	-27.72	-2.96	-72.05	0.56	-92.67	-44.67	-90.05	-6.11	-94.61	-51.54	-73.84	-17.61	-30.55	-15.89	-53.49	-55.99	-90.8	-44.53	-15.46	-61.11	-84.44	-59.01	-84.99
BRD-A85025557	NCS-382	GABA receptor antagonist	GABA receptor antagonist	GABBR1, GABBR2, SLC52A2	GABA receptor antagonist	0.14	-29.7	0	3.49	-7.88	-7.86	-9.26	-22.61	-68	-1.42	-24.19	-11.19	-0.6	3.52	10.78	-52.35	-27.82	14.46	-14.08	-41.63	-21.83	-14.79	28.21	-17.96	-25.7	9	-29.64	5.27	26.41	-27.8	-8.84	-18.49	1.94	-47	-5.71	-17.2	10.75	-40.01	-42.81	16.14	-27.97	-45.94	-42.56	-19.31
BRD-K62353524	DY-131	Estrogen receptor agonist		ESR2, ESRRB, ESRRG	Estrogen receptor agonist	-4.55	-23.96	-27.61	7.49	-1.2	-7.86	17.41	1.02	-52.02	0.92	45.96	21.6	-1.34	10.11	16.75	-44.97	-19.06	-27.42	-43.08	-2.04	14.93	16.16	25.67	-9.3	3.91	-20.76	2.91	-1.13	-22.34	3.95	45	-5.99	-1.69	28.85	3.22	23.23	27.41	-2.82	-45.71	57.05	23.21	27.79	52.27	4.78
BRD-K50859149	sulfafurazole	Bacterial antifolate	Dihydrofolate reductase inhibitor		Bacterial antifolate	0	-32.83	1.2	0	-1.13	-7.85	-50.26	-38.9	-79.25	-54.03	-69.38	-10.74	-15.48	15.01	-32.92	-24.9	22.06	-18.03	-45.88	-75.83	7.6	-5.89	-10.97	-77.53	-7.8	-47.78	-21.88	-1.9	-1.66	-83.89	-74.99	-4.05	26.18	-30.8	-4.33	-12.13	27.88	-16.22	-27.24	70.93	-37.38	-63.14	-13.18	-41.85
BRD-K36324071	NF-449	Purinergic receptor antagonist		P2RX1	Purinergic receptor antagonist	-11.72	-97.5	-33.78	28.82	1.09	-7.83	-97.11	-1.13	-87.39	-7.21	-82.54	-69.5	-15.64	-18.92	-37.48	-86.13	-83.97	-27.91	-94.88	-81.96	-37.89	-74.36	-6.17	-83.46	-65.36	-97.46	-91.82	-95.2	-11.59	-90	-61.24	-58.92	-48.69	-45.22	-36.3	-80.28	-50.65	-97.89	-64.34	-71.9	-82.85	-92.22	-55.44	-94.55
BRD-A22143024	estropipate	Estrogen receptor agonist	Estrogen receptor agonist	ESR1, ESR2	Estrogen receptor agonist	-7.4	-68.5	-13.3	-3.56	-25.66	-7.74	-27.2	-64.57	-71.76	5.1	-88.82	-20.39	-9.3	-5.65	-16.61	-63.09	-35.65	-52.02	-37	-47.04	-17.65	-30.33	8.09	-31.16	-14.38	-28.94	-67.85	5.92	8.87	-66.56	-18.71	-50.21	11.13	33.72	-0.88	-40.02	-73.84	-88.41	-24.96	-31.07	-64.64	-49.32	-35.73	-44.49
BRD-A36707673	hydroxycholesterol	LXR agonist		ABCA1, NR1H2, NR1H3	LXR agonist	-97.82	-93.73	-60.01	92.37	67.42	-7.72	-86.94	0	-80.44	-58.23	-81.55	-74.38	17.56	-63.14	-87.57	-37.68	-85.42	-88.38	-78.88	-85.42	-58.02	-55.38	-85.77	-64.04	-38.21	-95.66	-95.65	-65.53	-76.19	-27	-5.67	-3.98	-68.62	-84.09	-35.17	-88.41	-10.81	-96.31	-92.72	-61.95	-76.29	-83.08	-96.3	-94.11
BRD-K21806131	tegaserod	Serotonin receptor partial agonist		HTR4, HTR2B, HTR2A, HTR2C	Serotonin receptor partial agonist	0	73.38	1.44	-70.04	-29.41	-7.66	61.72	56.27	82.07	56.62	66.22	59.3	-32.59	-25.48	57.11	76.83	77.07	25.41	77.7	87.48	83.94	76.18	-73.51	73.31	-6.41	77.75	29.58	63.66	45.15	84.96	68.03	74.88	2.43	65.9	6.57	65.1	50.75	63.67	73.02	69.78	53.05	78.13	59.53	76.38
BRD-A84189516	baccatin-III	Paclitaxel precursor			Paclitaxel precursor	0	-6.63	-0.56	0	-3.25	-7.6	42.6	1.34	47.21	-27.04	43.25	61.1	4.81	67.11	28.3	30.83	-3.94	9.94	12.09	24.92	20.17	22.76	8.59	31.18	0.7	35.59	-10.8	9.37	-18.1	19.17	9.3	-5.09	0.53	38.34	9.44	-6.92	28.93	27.32	2.11	50.06	4.3	15.99	23.77	11.88
BRD-A09533288	verapamil	Calcium channel blocker		CACNA1C, CACNA1D, CACNA1G, CACNA1S, CACNA1A, CACNA1B, CACNA1F, CACNA1I, CACNB1, CACNB2, CACNB3, CACNB4, CYP2C8, CYP2E1, CYP3A4, CYP3A5, CYP3A7, DRD2, KCNA10, KCNA7, KCNH2, KCNJ11, NALCN, SCN5A, SLC29A4, SLC6A4	Calcium channel blocker	-21.34	-84.69	-5.37	-2.79	-1.2	-7.56	-91.67	-33.04	-74.44	-2.61	-47.37	-29.52	-1.9	-2.22	-17.89	-89.58	-68.85	-21.24	-56.87	-89.37	-9.76	-51.69	3.42	-54.35	-19.97	-71.74	-66.45	-87.54	-3.23	-88	-41.81	-26.4	-47.53	-10.29	19.4	-24.22	-25.15	-81.55	-69.83	-36.53	-60	-77.92	-45.48	-95.71
BRD-K55454768	TAS-301	Calcium-calmodulin dependent protein kinase inhibitor		CAMK2A	Calcium-calmodulin dependent protein kinase inhibitor	0.85	-47.36	2.64	8.79	-50.34	-7.52	11.39	5.5	-11.6	12.66	-17.14	5.57	9.42	3.37	23.61	43.99	-17.81	16.36	14.32	-7.76	-5.79	51.24	-38.1	-10.32	9.54	-8.02	-25.43	-3.36	-0.46	-4.44	-2.89	10.05	8.34	20.53	10.95	5.53	-26.45	4.46	-5.5	-6.43	-15.42	7.38	-5.06	-10.4
BRD-K29582115	ziprasidone	Dopamine receptor antagonist		DRD2, HTR2A, HTR1A, HTR1D, HRH1, HTR1B, HTR1E, HTR2C, HTR7, ADRA1A, ADRA1B, ADRA2A, ADRA2B, ADRA2C, CHRM1, CHRM2, CHRM3, CHRM4, CHRM5, DRD1, DRD3, DRD4, DRD5, HTR3A, HTR6, SLC6A4	Dopamine receptor antagonist, Serotonin receptor antagonist	-9.27	-88.3	-5.06	-20.43	47.1	-7.43	6.27	8.74	18.87	0	-88.84	4.65	18.85	-6	8.79	-41.57	-8.57	4.43	-82.66	-11.15	-92.21	-66.29	6.02	-60.66	-70.46	15.17	-79.32	-27.31	-5.72	-35.6	9.8	-25.74	-25.5	-5.04	8.84	-66.49	-5.18	-72.43	0	7.12	68.02	-49.48	-21.45	-36.63
BRD-A60197193	amisulpride	Dopamine receptor antagonist		DRD2, DRD3, HTR2A, HTR7	Dopamine receptor antagonist	-0.32	-37.72	-0.7	-2	-3.66	-7.4	-7.4	-27.08	-64.93	-9.58	-6.52	28.97	-5.67	-12.36	16.32	-55.56	-45.5	5.64	-15.19	-52.86	10.57	31.93	19.75	-62.76	-44.26	-32.74	-69.08	-54.05	-8.77	-45.4	-32.66	-55.42	-52.41	-0.99	20.57	-52.95	-54.36	-48.13	-11.47	-94	-35.5	-62.79	16.01	-38.53
BRD-K00184207	GR-206	Aryl hydrocarbon receptor ligand			Aryl hydrocarbon receptor ligand	-1.66	-18.58	-58.68	-2.64	1.66	-7.35	7.57	-1.69	-60.49	-23.45	-59.23	-51.96	3.49	-1.87	-11.37	-14.06	-65.91	-29.96	-31.53	-58.6	-63.99	-59.98	36.66	-48.56	-7.33	-48.77	-45.7	-55.49	3.52	-74.2	-26.22	0	-43.87	-4.35	3.1	-11.12	-20.47	-57.11	-18.65	-29.95	-61.7	-65.98	-91.74	-71.4
BRD-M64432851	sunitinib	FLT3 inhibitor	FLT3 inhibitor, PDGFR/KIT inhibitor, RAF inhibitor, VEGFR inhibitor	FLT3, KDR, KIT, FLT4, FLT1, PDGFRA, PDGFRB, RET, CSF1R, FGFR1	FLT3 inhibitor, KIT inhibitor, PDGFR receptor inhibitor, RET tyrosine kinase inhibitor, VEGFR inhibitor	86.87	82.81	47.24	-95.84	-26.74	-7.34	75.56	-10.81	58.65	-2.96	11.19	51.58	0	-44.76	-71.68	-14.41	26.25	-14.69	75.2	21.56	21.83	-42.76	-2.83	-2.91	-14.72	74.88	37.76	37.43	-28.18	88.36	-2.6	-40.51	-33.12	11.07	-8.81	3.98	-2.01	76.76	51.89	2.55	43.21	19.07	67.5	67.75
BRD-K74133369	oligomycin-a	ATP synthase inhibitor	ATPase inhibitor, ATP synthase inhibitor	ATP5A1	ATP synthase inhibitor, ATPase inhibitor	25.77	23.45	22.9	-54.39	12.59	-7.33	37.54	19.81	19.94	1.67	19.92	63.76	45.38	33.46	-9.45	53.6	9.34	36.66	55.43	30.83	-69.52	-40.39	-31.41	15.26	-2.68	65.68	5.28	13.99	5.89	44.78	22.38	14.96	-1.2	16.39	9.74	3.39	42.39	13.15	7.19	-24.6	51.54	59.35	4.63	74.42
BRD-A56675431	altizide	Thiazide diuretic	Na-K-Cl transporter inhibitor		Thiazide diuretic	0	-60.27	-21.86	4.98	30.8	-7.31	-3.24	-12.11	-22.7	-11.6	-53.27	8.97	-30.77	-21.94	-31.86	-57.2	-32.56	-56.86	-39.2	-24.7	15.54	-19.27	16.76	-15.01	-69.26	-19.02	-56.23	-45.12	17.78	-23.36	-51.33	-8.74	-19.78	-24.19	-6.8	-42.93	-3.91	-29.09	-14.87	-13.21	-26.97	-48.72	-94.5	-24.1
BRD-A06390036	hydroquinidine	Antiarrhythmic			Antiarrhythmic	0	-42.11	-47.48	-27.16	-1.55	-7.3	-73.54	-19.46	-36.14	-13.25	-39.42	0	-46.68	-11.59	-2.32	31.93	-50.31	-1.71	-50.04	-40.69	-1.76	-73.94	0	-15.33	-17.87	-48.16	-53.92	-29.09	-24.85	-23.4	-21.41	-6.45	-51.96	-63.83	6.06	-12.22	-9.34	-16.68	-1.44	-57.19	-18.68	-13.35	-41.05	-9.97
BRD-K59037100	oxybenzone	Lipase inhibitor		LIPE	Lipase inhibitor	0	3.07	8.15	-25.93	-44.8	-7.3	-29.37	0.88	-22.99	-48.57	-57.05	-50.21	-22.71	-30.05	-21.29	-46.27	-19.26	-2.71	-31.58	-16.34	-16.71	3.7	3.28	-40.16	-15.06	-20.76	-66.54	-35.97	8.47	-34.82	-23.84	-12.97	-7.09	-42.84	-24.67	-27.69	3.07	-12.34	-13.5	-28.27	-20.27	-11.54	17.41	-42.25
BRD-K07212038	selinidin	Mast cell stabilizer			Mast cell stabilizer	-32.07	41.24	-0.29	-18.31	7.15	-7.28	50.08	35.78	90.5	12.44	27.37	8.48	32.89	48.01	50.51	13.44	54.58	74.95	-15.16	74.56	1.43	17.61	65.12	74.84	28.11	67.96	15.11	50.16	-54.05	39.31	37.68	-24.94	26.17	45.64	28.97	32.94	-12.92	75.41	71.18	62.71	54.9	26.42	66.74	48.78
BRD-K01663662	diphenidol	Acetylcholine receptor agonist		CHRM1, CHRM3, CHRM4, CHRM2	Acetylcholine receptor agonist	0.28	19.04	0.28	-17.02	3.95	-7.27	-15.39	-1.13	-25.66	-57.87	-58.71	-31.99	-47.43	-17.43	-17.71	-4.76	-2.14	21.71	-65.09	-39.16	-67.4	-43.05	30.4	-55.64	-15.13	-4.38	-27.35	-21.71	1.76	-59.82	-0.74	-20.46	-2.88	-45.65	18.73	12.78	2.01	1.52	9.11	-44.83	-8.39	-1.62	15.99	-42.6
BRD-K77625572	etomoxir	Carnitine palmitoyltransferase inhibitor		CPT1A, CPT1B	Carnitine palmitoyltransferase inhibitor	0	-76.98	-3.19	0	0	-7.2	-62.64	-73.76	-69.62	-46.6	-59.4	-25.81	-25.48	51.74	-73.33	-73.34	-27.61	5.35	-73.31	-79.57	4.3	7.41	37.45	-6.2	-76.08	-88.52	-85.73	-32.5	0	-26.1	-76.55	-58.45	-35.86	-4.09	-31.25	-8.14	-42.04	-89.23	-46.23	-39.21	-88.18	-86.94	0	-82.42
BRD-K68336408	tyrphostin-AG-1478	EGFR inhibitor	EGFR inhibitor	EGFR, MAPK14	EGFR inhibitor	83.61	81.85	87.76	-87.38	31.97	-7.18	84.34	6.94	28.66	-3.59	70.59	34.78	-1.48	0.02	-0.78	4.4	7.89	-1.76	79.8	41.03	83.95	19.47	-74.46	-24.15	-1.52	74.19	5.78	77.69	69.3	64.46	-0.02	68.95	-26.24	-49.49	-1.61	35.32	60.88	26.24	66.43	31.39	32.47	45.44	-7.08	44.24
BRD-K93433262	alfacalcidol	Vitamin D receptor agonist	Vitamin D receptor agonist	VDR, CYP27B1, CYP3A5	Vitamin D receptor agonist	0	11.2	22.62	4.65	-5.62	-7.12	60.65	0	-3.77	-2.6	-25.37	39.83	-11.37	-62.19	-1.94	-5.87	32.2	0	-12.27	-9.49	-2.92	4.77	0	32.55	-54.04	3.81	-24.74	-7.37	41.07	5.32	-36.65	3.07	-3.59	16.84	-12.81	38.85	-26.2	20.68	-13.3	-27.21	-41.08	12.3	-8.97	5.41
BRD-K54704028	BAY-36-7620	Glutamate receptor antagonist		GRM1	Glutamate receptor antagonist	-0.39	-5.09	-2.18	0.39	4.13	-7.07	-14.06	6.83	-4.47	-0.46	-2.68	2.75	29.03	-0.35	-5.14	0.39	-2.54	-2.54	5.24	-9.33	3.28	4.95	16.31	-1.69	-4.15	3.31	-6.73	-21.87	4.95	4.42	-14.5	-16.49	2.95	0	-8.55	3.28	9.62	4.42	0.85	0.7	-2.75	-4.52	-3.87	0.67
BRD-A14798026	mestranol	Estrogen receptor agonist	Estrogen receptor agonist	ESR1	Estrogen receptor agonist	16.28	35.67	8.41	-1.35	10.44	-7.01	31.6	5.92	16.27	16.8	38.36	9.91	-16.11	78.77	25.93	-8.18	1.06	65.95	5.24	9.47	-12.43	29.86	5.52	-5.73	6.52	6.87	21.8	21.17	28.94	6.55	27.06	16.38	1.62	60.76	14.75	58.29	-0.95	34.95	-7.43	9.65	7.36	1.69	41.58	15.22
BRD-K20152659	gamma-homolinolenic-acid	Cholesterol inhibitor		PTGS1, PTGS2	Cholesterol inhibitor, Platelet aggregation inhibitor, Prostanoid receptor agonist, Prostanoid receptor stimulant	-22.75	-24.95	-18.12	-9.13	-16.13	-7	7.07	-35.01	-2.15	-30.39	-38.89	-88.06	46.61	-61.49	-30.84	-64.76	11.46	-21.6	-90.05	-60.61	-87.4	-91.85	-8.08	-44.02	-31.65	-31.75	-78.07	-34.31	-34.43	-61.22	-63.67	-60.18	9.1	-50.14	-13.79	-69.11	-60.49	-34.7	-20.11	19.01	-4.62	-62.3	16.78	-75.54
BRD-K99922388	DPO-1	Potassium channel blocker	Potassium channel blocker	KCNA5	Potassium channel blocker	1.55	1.13	3.16	-20.57	2.42	-6.98	-0.53	1.24	1.13	-3	0	12.57	-5.51	0.35	-3.81	-2.82	1.59	19.02	1.5	0.42	7	6.94	9.71	2.01	-3.92	6.11	-2.9	-1.59	3.3	1.23	-1.01	-8.53	0	33.51	0.7	2.14	3.47	1.2	0.81	20.72	2.84	-0.32	4.36	9.28
BRD-K64670467	JNJ-16259685	Glutamate receptor antagonist		GRM1	Glutamate receptor antagonist	-1.44	-33.36	3.56	-4.69	-16.39	-6.97	7.75	2.22	36.52	0	21.1	20.91	-2.57	33.36	12.12	-28.53	-28.29	8.88	-34.04	-30.69	-8.65	-18.76	4.83	24	-19.97	-9.63	-1.6	-45.69	-8.7	6.16	1.6	1.02	-28.35	-16.38	-48.15	10.67	20.72	-16.94	-2.04	31.83	2.29	-48.94	-54.16	-31.09
BRD-K51805276	temefos	Cholinesterase inhibitor			Cholinesterase inhibitor	5.29	21.18	24.86	-37.74	-16.86	-6.82	14.41	-1.27	7.46	-9.63	24.23	29.28	-1.56	1.37	19.14	-1.94	-14.76	11.45	-1.3	6.27	-70.91	68.47	39.39	-22.82	1.27	10.86	-5.29	-13.2	21.32	-29.66	-4.6	-36.21	0	47.77	11.34	36.62	-17.61	23	-7.84	1.23	-2.78	-44.04	-2.34	20.25
BRD-K33860217	CP-94253	Serotonin receptor agonist		HTR1B	Serotonin receptor agonist	0	4.65	0	5.44	0	-6.8	3.49	-25.82	9.86	47.48	11.53	8.38	-0.74	16.1	-42.64	0.81	6.86	44.54	-28.84	18.19	22.13	-17.46	16.93	10.44	39.38	43.11	-23.59	-25.11	22.35	12.74	-13.09	-14.51	-10.35	11.33	18.68	26.71	11.51	13.96	-11.77	9.6	39.25	13.96	58.52	27.33
BRD-A10420615	cyclopiazonic-acid	ATPase inhibitor	ATPase inhibitor	ATP2A1	ATPase inhibitor	0.67	55.16	10.46	-10.24	13.02	-6.73	55.63	44.66	25.67	0.74	-1.34	2.56	-23.97	-18.17	-0.95	-10.44	11.1	5.21	32.07	21.5	8.71	-27.82	-10.02	-1.2	-2.64	18.57	6.73	5.39	8.98	27.37	0.74	18.21	-29.77	16.84	-16.1	27.58	1.3	44.62	31.65	-2.96	-8.65	54.79	16.57	-6.33
BRD-A93477898	PETCM	Caspase activator		CASP3	Caspase activator	0	2.6	-9.61	-15.24	-1.02	-6.68	8.99	6.54	3.32	-6.79	-1.94	5.75	20.71	20.87	-3.97	2.82	4.79	0.4	8.76	-5.39	1.59	40.92	20.6	10.38	1.44	32.71	-11.16	2.73	-17.77	42.48	25.92	-11.91	8.05	2.86	9.95	10.25	49.02	8.27	9.86	32.38	59.43	4.36	18.6	5.93
BRD-A98431941	ephedrine	Adrenergic receptor agonist		ACHE, ADRA1A, ADRB2, SLC18A2, SLC6A2	Adrenergic receptor agonist	25.55	-36.64	11.3	0	-13.18	-6.66	-22.12	-20.4	-11.26	-19.83	-5.64	12.05	11.62	3.32	-10.52	-39.21	-47.08	-9.45	-3.42	-9.31	2.01	1.23	-20.5	-22.78	-58.62	-5.06	-3.16	-20.18	10.84	-3.38	21.76	-3.76	4.98	-26.9	6.87	-10.35	20.87	-4.22	-9.05	-2.36	5.34	-30.3	-8.12	6.65
BRD-K63606607	bufalin	ATPase inhibitor	ATPase inhibitor	ATP1A1	ATPase inhibitor	45.43	84.63	41.19	-89.78	5.32	-6.63	59.47	10.79	50.86	-70.55	5.36	28.66	-54.92	-24.45	72.58	46.57	18.55	-85.73	81.86	26.6	-21.66	4.79	-94.86	38.78	-41.35	70.59	21.29	67.06	-42.43	4.13	0	70.84	0	21.81	0	67.01	20.73	68.73	-6.27	44.98	41.73	46.12	44.99	-16.52
BRD-K62982419	cilomilast	Phosphodiesterase inhibitor		PDE4A, PDE4B, PDE4D, IL12A, IL12B, IL1B, PDE4C, TNF	Phosphodiesterase inhibitor	0	-7.59	1.83	-2.57	-21.33	-6.6	-2.57	-71.34	-28.59	-76.61	-52.78	-10.04	-70.94	1.73	-21.87	-55.84	-33.2	0	-23.95	-40.16	-56.38	-50.81	9.34	-27.16	-24.15	-83.06	-29.41	-13.3	-14.38	-47.06	-2.63	-39.68	-31.78	-12.28	1.94	-23.53	15.43	-16.06	-21.32	-2.92	-10.4	-38.33	7.56	-31.78
BRD-K13926615	vardenafil	Phosphodiesterase inhibitor		PDE5A, CYP2C19, CYP2C8, CYP3A5, PDE6G, PDE6H	Phosphodiesterase inhibitor	NaN	0.83	NaN	0.99	-0.49	-6.59	-23.78	-0.42	15.44	-1.93	-11.35	3.57	-20.12	12.74	-7.08	-21.71	3.84	8.45	9.28	15.39	22.42	14	-1.02	-13.77	-4.89	-37.43	-8.26	-2.68	2.66	11	3.38	-0.42	-6.16	-8.24	0.53	3.21	4.3	-10.4	7.35	1.55	7.08	4.55	-7.94	15.41
BRD-A82656074	naltrindole	Opioid receptor antagonist		OPRD1, OPRK1, OPRM1	Opioid receptor antagonist	-13.18	7.08	-1.02	-5.78	-1.94	-6.59	48.8	81.47	42.89	51.86	-8.88	23.63	-12.54	-1.37	46.32	11.33	52.31	13.55	16.82	5.61	-1.59	-2.4	1.48	14.4	78.68	24.82	14.65	18.98	59.5	16.16	70.28	40.31	1.48	1.3	13.85	10.43	-8.88	44.63	52.27	27.29	51.22	23.85	31.22	36.95
BRD-K60640630	mometasone	Glucocorticoid receptor agonist	Glucocorticoid receptor agonist	NR3C1	Glucocorticoid receptor agonist, Immunosuppressant	3.45	3.63	-0.6	-51.35	-24.62	-6.57	-1.55	0	-6.65	-25.97	-9.14	32.62	-0.93	-3.88	-58.36	-9.1	-19.53	8.22	-16.61	5.14	-1.37	-65.36	-7.21	-16.65	-5.29	16.26	-15.53	-27.9	-16.64	-0.39	-4.8	7.56	-19.17	3.03	3.42	-0.67	0.95	29.57	1.06	-19.18	-11.14	-4.07	55.11	13.51
BRD-K09631521	thiotepa	Cytochrome P450 inhibitor		CYP2B6	Cytochrome P450 inhibitor	49.22	-12.96	16.74	-14.75	-17.19	-6.44	-1.83	-33.4	-53.52	-27.93	-29.26	6.2	-16.74	-33.51	-19.48	-13.16	-36.89	-20.49	-9.73	-15.23	-28.14	-14.85	-0.31	-74.48	-31.73	-60.95	-32.09	-20.27	-23.24	-30.29	-34.32	-23.02	1.06	-35.29	-4.86	-5.17	-14.49	-20.06	23.81	-55.63	-67.93	-62.7	-1.13	-25.38
BRD-K02265150	amoxapine	Norepinephrine reuptake inhibitor	Norepinephrine reuptake inhibitor	SLC6A2, SLC6A4, HTR2A, HTR6, ADRA1A, ADRA1B, ADRA1D, ADRA2A, ADRA2B, ADRA2C, CHRM1, CHRM2, CHRM3, CHRM4, CHRM5, DRD1, DRD2, DRD3, DRD4, GABRA1, GABRA2, GABRA3, GABRA4, GABRA5, GABRA6, GABRB1, GABRB2, GABRB3, GABRD, GABRE, GABRG1, GABRG2, GABRG3, GABRP, GABRQ, HRH1, HRH4, HTR1A, HTR1B, HTR2B, HTR2C, HTR3A, HTR7, SLC6A3	Norepinephrine reuptake inhibitor	-1.22	-6.25	-3.63	-23.55	-14.35	-6.42	-6.34	-6.98	0.46	37.27	-15.11	24.73	-8.39	-42.58	-11.39	-13.98	-13.98	-1.37	-15	-31.89	-25.15	-40.26	2.36	-38.15	-8.28	-3.91	-50.04	-91.25	14.16	-15.13	-22.11	-4.69	-37.25	-22.22	-8.8	-21.1	-8.44	14.92	2.48	17.8	7.81	-4.76	1.96	-61.64
BRD-A65671304	candesartan	Angiotensin receptor antagonist	Angiotensin receptor antagonist	AGTR1, AGTR2	Angiotensin receptor antagonist	0.42	-4.29	0.11	4.93	-64.23	-6.41	-12.5	4.21	-11.13	-0.6	1.69	12.31	22.44	5.42	5.49	6.26	-7.1	13.23	-1.76	7.95	6.5	6.4	5.14	-8.73	7.31	-1.2	-0.32	-6.46	-30.26	-7.32	-7.73	-0.21	-39.53	0.92	8.75	3.17	-17.9	3.07	0.11	-12.33	1.57	-6.3	25.35	-2.18
BRD-K85013741	auraptene	Nitric oxide production inhibitor		MAOB	Nitric oxide production inhibitor	0	-97.39	-13.21	-3	-1.09	-6.4	-50.64	-1.02	-53.61	-2.22	-37.48	-52.35	-1.94	-68.53	-73.97	-42.76	-62.41	-37.18	-85.98	-76.03	-29.47	-67.99	-1.52	-45.85	-31.02	-45.41	-83.89	-54.91	2.99	-90.86	-67.82	-26.3	-82.43	-69.6	-50.87	-45.57	-67.11	-50.88	-68.35	-59.49	-59.5	-72.38	-47.26	-76.29
BRD-K02275692	cefotiam	Bacterial cell wall synthesis inhibitor			Bacterial cell wall synthesis inhibitor	0	-27.91	-14.85	-1.09	17.21	-6.39	-35.91	-4.69	4.63	0.7	-54.33	8.73	-15.16	-11.84	-46.73	-34.28	-31.43	-27.28	2.82	-43.89	-28.35	-47.73	-1.37	-6.34	-1.37	-24.77	-23.08	-8.02	28.47	-31.46	6.26	-19.12	-23.79	-1.83	-10.96	-54.41	-19.66	16.74	-22.11	28.39	-59.48	-15.17	-25.46	-14.12
BRD-K17823458	danoprevir	HCV inhibitor			HCV inhibitor	-94.4	-91.71	-27.68	33.56	-13.08	-6.34	-70.99	-10	-75.24	-44.8	-92.24	-72.87	-26.96	-25.25	-58.89	-85.15	-53.79	-71.5	-77.75	-94.97	-7.33	-15.12	-17.97	-77.67	-91.69	-96.15	-98.91	-47.68	57.31	-65.98	-76.4	-23.87	-63.64	-7.19	-29.17	-87.66	-70.69	-94.53	-91.88	-74.79	-75.47	-42.81	-10.85	-82.12
BRD-A24122750	saclofen	GABA receptor antagonist	GABA receptor antagonist	GABBR1, GABBR2, KCTD12, KCTD16, KCTD8	GABA receptor antagonist	0	8.46	0	-1.13	-1.35	-6.26	-12.75	4.91	11.61	5.43	-35.66	9.67	-0.92	-10.46	8.53	-19.42	50.5	-8.02	-32.32	9.31	5.7	-16.33	20.28	6.62	-22.6	12.13	9.29	-16.04	16.04	12.13	3.17	-14.58	-1.52	33.73	12.14	-8.89	11.88	-1.66	6.97	12.33	14.23	5.99	18.31	36.85
BRD-K00656370	6-aminochrysene	Transferase inhibitor			Transferase inhibitor	1.16	9.15	-12.35	-1.59	12.91	-6.24	5.91	29.09	6.24	-12.68	58.94	-11.97	27.97	19.82	13.77	20.85	3.86	10.4	11.79	8.95	-18.67	16.42	3.14	7.46	42.73	-4.8	-4.89	-24.32	69	11	51.04	0	-4.99	-1.16	15.52	22.57	5.18	-17.09	61.56	-38.81	6.2	9.36	-8.81	6.42
BRD-A00100033	nifurtimox	DNA inhibitor			DNA inhibitor	0	-10.39	-0.88	23.7	-3.82	-6.22	-7.82	4.9	-1.23	1.59	-19.86	46.64	-2.11	23.62	-1.25	-6.81	-8.6	-0.92	-41.22	-13.99	13.92	-5.64	16.87	1.8	-10.33	-14.18	-8.66	23.75	14.69	-24.16	-18.38	-10.35	-1.3	1.27	-4.3	-4.02	-24.4	-12.42	-15.53	-7.26	-32.57	-15.26	-10.1	3.1
BRD-A08187463	racecadotril	Enkephalinase inhibitor		MME	Enkephalinase inhibitor	5.52	-8.11	0.99	0	2.1	-6.21	-68.29	18.29	-46.56	-2.18	-27.35	50.34	-8.34	9.8	-29.12	-1.23	-24.36	-12.13	-5.64	-21.01	-31.9	8.11	-6.64	-55.53	-9.87	-50.99	-60.97	-29.67	17.12	-49.87	-12.95	4.24	1.13	-1.69	5.45	-11.82	-22.92	-51.06	-1.83	-22.52	-44.48	-42.36	-3.07	-44.77
BRD-A94793051	gestrinone	Progesterone receptor antagonist	Androgen receptor modulator, Progesterone receptor antagonist	PGR, AR, ESR1	Progesterone receptor antagonist	5.36	4.47	0	-68.21	0	-6.2	5.59	0	-38.39	-88.3	-62.22	-57.38	-28	-57.05	-56.84	-4.47	0	-55.76	-13.05	-44.08	-84.21	-60.24	-66.67	-73.89	-34.4	19.74	-11.88	-13.16	0	-20.01	-94.58	11.68	-65.12	-82.42	0	-12.15	-7.18	-7.04	0	-11.15	-58.1	0	-58.22	-47.57
BRD-K97810537	beclometasone	Glucocorticoid receptor agonist	Glucocorticoid receptor agonist	NR3C1, CYP3A5, GPR97, SERPINA6	Glucocorticoid receptor agonist, Immunosuppressant	-0.11	7.89	-0.11	-9.02	-39.17	-6.13	-7.96	-18.55	-66.5	-18.68	65.7	19.52	-0.67	-2.29	-1.8	-50.81	-42.61	-1.9	7.53	9.5	-10.95	-31.09	-75.87	1.37	10.06	10.81	-16.63	-9.66	-21.04	-37.62	-8.6	1.94	-3.44	11.7	-43.15	-22.28	1.62	-4.97	-5	-18.35	-7.47	-2.68	55.63	-42.78
BRD-K20755323	SA-792728	Sphingosine kinase inhibitor		SPHK1, VCP	Sphingosine kinase inhibitor	0.03	86.74	0.11	-18.89	-0.04	-6.06	91.68	31.43	65.96	0.29	11.84	42.43	-0.02	-0.28	14.3	92.42	26.14	66.97	74.97	51.67	81.01	14.25	-19.05	49.09	25.2	90.66	1.59	71.12	58.41	76.04	1.3	80.77	-13.16	-1.9	31.48	4.56	5.93	74.97	65.6	2.08	-22.17	75.76	-13.91	81.02
BRD-K98769987	flumazenil	Benzodiazepine receptor antagonist		GABRA1, GABRA2, GABRA3, GABRA5, GABRA4, GABRA6, GABRB1, GABRB2, GABRB3, GABRD, GABRE, GABRG1, GABRG2, GABRG3, GABRP, GABRQ	Benzodiazepine receptor antagonist	-0.63	-48.55	-0.57	-0.53	0.7	-5.99	-66.02	-36.49	-61.41	-17.88	-69.1	-26.61	-40.06	-51.06	-55.07	-71.44	-59.02	-53.88	-56.08	-86.96	-24.46	-57	-14.73	-82.87	-72.25	-85.15	-83.84	-39.84	10.71	-80.39	-66.34	-5.59	-41.47	-52.71	-32.63	-32.53	-61.37	-55.19	-36.24	-32.48	-67.53	-72.28	-66.31	-59.2
BRD-K97564742	mepyramine	Histamine receptor antagonist		HRH1	Histamine receptor antagonist	0.18	-28.84	0	-4.77	0.14	-5.9	-26.05	-16.3	-31.93	3.38	-68.34	-51.31	-8.1	-9.27	-28.55	8.1	-8.11	-46.39	-74.99	-45.82	-25.81	-31.8	57.38	-60.28	37.38	-80.57	17.34	-62.7	-10	-68.15	-3.1	-30.08	-49.29	-57.16	79.3	-85.19	-30.43	-41.9	-25.12	-13.38	-54.79	-64.09	-73.19	-43.11
BRD-K56334280	amonafide	Topoisomerase inhibitor	Topoisomerase inhibitor	TOP2A, TOP2B	Topoisomerase inhibitor	-14.2	4.05	0	-5.97	5.74	-5.89	0	-35.66	-4.93	-63.14	59.76	-40.59	0	-45.63	4.16	8.49	10.61	-5.43	98.03	36.85	70.71	-75.02	0	86.14	-4.98	44.64	-25.07	66.09	-71.5	73.37	-5.53	0	-69.13	33.22	-91.38	-71.97	48.52	-26.33	0	-8.7	-21.55	-35.13	20.59	-37.82
BRD-K18895904	olanzapine	Dopamine receptor antagonist		DRD2, HTR2A, HTR2C, DRD1, DRD3, DRD4, HRH1, HTR1A, HTR1B, HTR1D, HTR1E, HTR6, HTR7, ADRA1A, ADRA1B, ADRA2A, ADRA2B, ADRA2C, ADRB1, ADRB2, ADRB3, CHRM1, CHRM2, CHRM3, CHRM4, CHRM5, CYP2C8, DRD5, GABRA1, GABRA2, GABRA3, GABRA4, GABRA5, GABRA6, GABRB1, GABRB2, GABRB3, GABRD, GABRE, GABRG1, GABRG2, GABRG3, GABRP, GABRQ, HRH2, HRH4, HTR1F, HTR2B, HTR3A, HTR5A	Dopamine receptor antagonist, Serotonin receptor antagonist	-0.28	-47.52	1.23	0.28	2.57	-5.88	9.32	5.85	-97.19	-43.57	-65.43	-62.5	-8.96	-4.21	49.75	-54.87	-81.81	24.29	14.69	-85.83	26.52	-95.39	-38.29	-95.71	-5.95	-94.6	-57.32	12.72	5.99	-93.09	-83.81	-4.11	-1.27	-56.88	-76.04	-22.22	-6.62	-83.36	-0.28	57.33	51.08	-93.64	31.24	-82.94
BRD-K80451230	zamifenacin	Acetylcholine receptor antagonist		CHRM3	Acetylcholine receptor antagonist	0	0.25	-0.14	-9.51	-16.69	-5.88	-7.82	13.65	-5.72	-0.7	-6.88	3.89	5.25	10.77	4.69	0.39	-11.47	31.36	3.45	-12.21	-4.4	-3.66	7.62	8.69	6.91	1.02	20.49	1.8	-9.46	1.87	-17.01	-2.18	-19.08	49.07	-1.87	49.05	27.1	1	12.38	-11.68	66.19	-16.86	25.25	-1.62
BRD-K02637541	celecoxib	Cyclooxygenase inhibitor		PTGS2, CA12, CASP3, CYP2C19, PDPK1	Cyclooxygenase inhibitor	-0.01	-9.67	-0.14	-0.21	-5.45	-5.82	-15.03	1.08	6.51	-3.66	-60.9	-61.95	-4.9	1.16	-48.45	15.16	-5.43	-1.66	-3.24	-40.86	-5.25	-8.11	-10.82	4.26	-31.99	-6.72	-63.98	-9.27	-13.81	-19.74	-3.24	-0.56	-1.09	-23.64	8.28	-4.51	0.11	-11.96	-1.66	-56.94	-1.26	-4.37	1.83	-42.22
BRD-A29644307	nomifensine	Dopamine uptake inhibitor		SLC6A2, SLC6A3, DRD2, MAOA, MAOB, MPO	Dopamine uptake inhibitor, Noradrenaline uptake inhibitor	-14.02	-39.6	-4.93	44.63	-17.14	-5.77	-29.97	-36.49	-28.17	-4.33	-67.73	28.27	-24.05	-7.65	-40.64	-59.03	-23.84	0	-44.29	-14.3	-2.18	-12.11	11.4	-29.92	-25.64	-46.48	-65.3	-52.3	26.26	-47.3	-9.37	30.49	-17.88	3.92	-20.33	-29.33	5.14	-35.91	-19.22	-9.67	-58.76	-67.55	12.31	0
BRD-K60460488	nelfinavir	HIV protease inhibitor	HIV protease inhibitor	CYP2C19, CYP3A5, CYP3A7	HIV protease inhibitor	-0.95	9.7	0.56	-0.74	-5.57	-5.76	49.17	7.53	22.15	1.52	13.51	26.67	-11.04	0	11.42	7.08	11.83	43.67	9.35	20.73	66.32	61.31	36.66	37.94	-18.62	39.2	-6.76	16.12	13.39	39.26	23.74	35.82	-0.63	1.55	-0.81	45.39	1.83	4.22	9.06	7.2	27.45	6.06	7.23	8.59
BRD-A06726973	dibutyrylcyclic-gmp	cGMP analog			cGMP analog	4.94	-10.53	-0.7	0	3.49	-5.72	20.89	9.97	30.75	-3.38	7.41	10.52	-8.49	17.61	18.79	-7.31	-1.37	-1.76	8.17	-13.42	7.22	18.73	8.24	12.69	0.74	24.86	-18.64	3.57	14.99	-11.71	10.52	14.23	3.91	12.76	0	8.33	27.46	41.24	15.82	27.27	10.41	3.17	-7	14.23
BRD-K46211610	tolazoline	Adrenergic receptor antagonist		ADRA2A, ADRA2B, ADRA2C, ADRA1A, HRH1, HRH2	Adrenergic receptor antagonist	-0.63	-6.48	-1.37	0.03	-16.04	-5.65	-3.64	0.28	-58.43	1.83	-43.29	3.52	2.67	-15.29	3.35	-2.47	-2.18	12.08	-35.97	-32.8	-9.47	-44.93	2.71	-21.34	-18.79	-5.01	-84.73	-11.45	5.14	8.26	-4.95	2.11	3.63	-7.68	-56.38	-6.99	-12.45	2.47	0.85	3.84	-11.78	-62.12	14.58	-36.17
BRD-K90027355	spironolactone	Mineralocorticoid receptor antagonist		NR3C2, AR, CACNA1A, CACNA1B, CACNA1C, CACNA1D, CACNA1F, CACNA1G, CACNA1H, CACNA1I, CACNA1S, CACNA2D1, CACNA2D2, CACNA2D3, CACNB1, CACNB2, CACNB3, CACNB4, CACNG1, CYP11B2, KCNA5, KCND3, NR3C1, PGR, SCNN1A, SHBG	Mineralocorticoid receptor antagonist	0.35	6.65	-0.58	-0.85	-24.54	-5.64	11.37	5.23	-3.14	19.45	11.53	1.8	-1.85	8.97	9.54	-1.76	26.03	-0.28	18.24	-3.28	5.43	-22.56	4.9	-2.18	-3.24	5.36	1.8	3.9	-10.36	34.08	-0.71	-2.42	2.39	22.75	32.35	2.15	5.78	46.96	16.5	45.01	23.3	7.47	15.34	24.88
BRD-K14536225	piceid	Glucosidase inhibitor		GAA, XDH	Glucosidase inhibitor	0	-1.66	0	5.49	3.66	-5.6	3.14	21.54	8.26	24.14	11.48	74.6	12.71	20.64	21.98	-1.73	-2.88	12.52	11.68	20.54	8.92	29.55	14.42	8.7	5.36	12.92	8.8	4.44	8.48	27.71	25.48	0	-2.57	20.63	5.6	-6.38	13.63	-6.22	8.74	59.23	7.68	6.27	14.61	31.93
BRD-K13356952	methazolamide	Carbonic anhydrase inhibitor		CA1, CA2, CA4, CA7, CA12, CA14, INS	Carbonic anhydrase inhibitor	0	-90.76	0	3.1	-13.8	-5.53	-88.08	-68.78	-87.86	-6.11	-97.12	-59.44	-75.09	-46.52	-82.41	-74.07	-82.04	-64.34	-65.74	-96.58	-85.35	-82.65	-66.81	-80.12	-80.85	-93.3	-95.48	-55.58	-55.05	-92.63	-52.2	-44.23	-48.96	-75.9	-69.61	-68.68	-80	-92.49	-39.28	-43.31	-90.08	-88.66	-79.9	-93.49
BRD-K55591206	epigallocatechin	Nitric oxide synthase inhibitor		FASN, APP, BACE1, CYP19A1, DYRK1A, ELANE, ENOX2, EP300, IDO1, KAT2B, KDR, MMP14, MMP2, PPARA, PREP, SLC5A1	Nitric oxide synthase inhibitor, Bacterial DNA gyrase inhibitor	3.03	-13.54	2.92	-25.06	14.38	-5.52	-58.74	-10.22	-76.35	-49.29	-51.15	-46.21	-19.27	-19.72	-24.51	-78.03	-42	-58.74	-40.37	-47.26	-29.42	-62.27	-19.91	-69.26	-19.87	-32.99	-49.26	-55.25	7.92	-17.98	-47.99	5.5	0.88	-71.12	-5.92	-29.97	0.92	-19.34	-3.03	-80.73	-4.84	-41.08	-10.24	-42.83
BRD-K82823076	RO-15-4513	GABA benzodiazepine site receptor inverse agonist		GABRA1, GABRA2, GABRA3, GABRA5, GABRA4, GABRA6, GABRB2, GABRG2	GABA benzodiazepine site receptor inverse agonist	-6.86	-8.18	-22.05	45.52	25	-5.52	-0.94	24.16	-7.78	-1.74	-9.51	-41.96	-9.48	14.37	-26.9	-19.71	7.68	0	-9.93	-19.63	10.93	0	-1.55	-30.72	-16.67	-6.64	-9.44	-16.53	2.5	-6.42	-3.09	-16.78	-13.02	-2.08	17.49	-40.45	-6.63	-6.45	-2.43	-11.44	-23.94	-18.85	-26.42	-22.03
BRD-K04923131	GSK-3-inhibitor-IX	Glycogen synthase kinase inhibitor	Glycogen synthase kinase inhibitor, PKC inhibitor	ALOX5, GSK3A, GSK3B	Glycogen synthase kinase inhibitor, Lipoxygenase inhibitor	0	48.18	54.2	98.77	0	-5.43	26.84	3.81	-9.03	88.25	-13.49	-16.69	92.13	59.88	-6.45	75.7	17.94	71.68	86.87	80.93	65.44	52.67	0	77.59	-45.45	24.59	-31.86	29.53	36.86	15.34	14.24	-34.35	-5.43	0	-18.45	82.3	80.86	-53.58	-14.16	13.46	21.88	61.19	29.47	21.01
BRD-A52172093	VU-0413807-2	Calcium channel blocker		CACNA1G, CACNA1H, CACNA1I	Calcium channel blocker	3.7	2.54	-6.87	-2.68	3.55	-5.38	-42	-36.15	15.34	0	-83.29	-11.97	0	27.84	-17	-26.28	6.63	-6.85	-33.2	-37.29	-16.87	-51.31	-6.68	-30.64	-46.32	16.4	-23.26	-47.83	10.45	-45.67	59.66	-4.86	-8.14	19.77	0	-20.07	-6.94	-11.32	8.12	13.6	-23.79	-40.97	3.46	-41.46
BRD-A35033682	eriodictyol	Cytochrome P450 inhibitor		CYP1B1, NFE2L2, XDH	Cytochrome P450 inhibitor	-30.9	-13.72	-10.84	48.74	0	-5.36	19.18	-0.49	45.41	1.11	7.99	4.3	-15.28	-10.84	-0.49	79.01	5.34	47.89	37.46	14.99	17.17	8.57	0.63	6.6	13.78	21.97	-32.01	39.05	-0.81	19.98	10	10.88	-36.21	10.42	35.12	15.87	3.03	29.36	0.53	20.2	-11.95	7.21	20.82	14.02
BRD-K93034159	cladribine	Adenosine deaminase inhibitor	Ribonucleotide reductase inhibitor	ADA, PNP, POLA1, POLE, POLE2, POLE3, POLE4, RRM1, RRM2, RRM2B	Adenosine deaminase inhibitor, Ribonucleoside reductase inhibitor	0.32	3.69	2.87	60.65	-30.87	-5.32	18.23	-30.71	29.52	14.87	2.39	0.42	0	-5.08	-21.76	76.92	19.32	-0.42	77.91	71.85	29.75	25.56	-51.88	56.13	-0.42	53.46	46.72	70.49	28.17	40.91	-82.43	-6.69	-0.56	-0.11	-1.97	60.44	60.52	5.5	9.85	-52.98	48.96	-32.85	48.87	21.8
BRD-K61217870	n-(3-acetamidophenyl)-3-chlorobenzamide	Glutamate receptor antagonist		GRM5	Glutamate receptor antagonist	0.39	-0.92	0.14	-4.93	-15.78	-5.24	-91.82	-92.44	-93.02	-67.2	-72.85	-39.81	-46.02	-48.35	-73.76	-81.92	-69.58	13.52	-61.1	-92.77	-43.16	-70.7	-41.72	-88.78	-34.54	-81.56	-41.62	-42.69	8.23	-71.26	-91.05	5.14	-46.79	-82.71	-12.33	-58.12	-25	-70.25	-14.88	-55.17	-74.33	-83.18	-31.51	-78.14
BRD-M45964048	verteporfin	Photosensitizing agent			Photosensitizing agent	1.26	-9.92	0	-6.25	-2.58	-5.19	33.25	6.91	33.86	1.76	-18.32	40.04	19.95	4.28	-8.38	4.22	52.45	10.3	-19.83	79.31	-0.27	2.57	-15.54	-14.09	-13.56	28.47	57.13	-17.31	4.4	9.59	3.68	-11.62	2.08	13.54	2.08	16.83	9.07	21.62	17.21	20.99	21.98	3.54	28.22	19.46
BRD-K24681473	YM-155	Survivin inhibitor		BIRC5	Survivin inhibitor	0	44.87	0	-6.08	5.18	-5.18	59.48	78.93	67.4	4.79	37.03	64.03	-33.17	42.58	75.6	84.28	54.09	5.79	84.38	75.52	32.49	33.33	0	89.09	-17.94	57.55	67.31	66.37	-87.71	76.15	5.91	84.4	-6.15	48.7	0	69.94	-5.5	81.27	35.76	-28.63	67.07	52.85	81.92	32.02
BRD-K96134740	kitasamycin	Protein synthesis inhibitor			Protein synthesis inhibitor	-8.62	-43.81	-3.56	6.93	-2.82	-5.16	-40.98	19.73	-63.11	-0.79	-38.83	13.09	-13.23	-33.33	-22.46	-34.96	-73.64	-53.17	-27.7	-33.34	-34.33	-56.37	-3.55	-52.26	-56.84	-65.13	-52.81	-12.65	14.59	-47.94	-28.64	18.16	-7.87	-38.61	-17.87	-25.96	-20.01	-52.05	-44.93	-25.26	-36.77	-5.62	-63.02	-62.91
BRD-K65331431	retinyl	vitamin analog			vitamin analog	-9.7	-59.88	-2.11	41.39	0	-5.1	-9.29	1.8	-15.65	0	-7.13	56.18	-10.23	-5.68	-26.07	50.63	-27.23	22.49	-9.33	-30.68	-12.02	-49.61	43.79	-43.04	9.99	-2.85	-35.27	-34.38	-2.64	-22.2	-11.41	-7.07	-10.13	1.77	-1.94	-23.25	0	-12.88	-10.08	10.44	-30.1	-6.89	-10.7	-12.43
BRD-K59419204	AM-281	Cannabinoid receptor antagonist		CNR1, CNR2, GPR55	Cannabinoid receptor antagonist	21.14	59.91	49.46	-21.59	-57.39	-5.05	37.69	0	73.09	65.39	5.77	16.38	-8.01	13.09	14.42	3.15	13.15	20.21	-3.39	7.13	-10.86	2.89	8.32	22.54	13.15	23.83	11.72	81.27	0	7.47	21.49	7.56	0	10.66	31.53	56.08	8.16	10.15	1.34	12.66	61.88	43.5	46.65	18.54
BRD-K92015269	GBR-12783	Dopamine uptake inhibitor			Dopamine uptake inhibitor	0.81	1.94	0.28	-5.07	-19.37	-5.04	-7.68	-4.7	-5.04	0	-0.56	6.9	23.02	-2.47	-2.87	0.25	5	29.57	-15.21	-8.18	2.64	-2.71	2.43	-0.42	-5.89	0.81	4.07	-0.42	-21.77	5.68	7.31	-0.53	-15.47	-2.68	8.17	4.79	1.83	-2.42	3.79	4.8	-2.79	4.35	-1.02	3.08
BRD-K21733600	rofecoxib	Cyclooxygenase inhibitor		PTGS2, CYP3A4, ELN	Cyclooxygenase inhibitor	-0.7	-11	-10.92	1.02	-1.74	-5	-10.95	-10.07	-37.74	1.55	-55.1	27.44	0.67	5.46	2.47	-5.43	-36.6	4.93	-26.26	-34.59	6.56	-20.05	8.6	-26.93	-10.5	7.68	-23.9	-21.83	5.63	-25.18	5.3	25.02	5.05	29.74	-3.42	-18.64	-9.2	-14.44	-8	-7.4	-54.39	-14.55	-35.83	-20.46
BRD-K01555864	dibenzoylmethane	Antineoplastic			Antineoplastic	0	-5.41	2.4	40.18	0	-4.94	-46.26	-6.06	-44.85	29.59	-48.18	2.1	0	28.9	-6.19	60.15	7.65	35.56	-14.89	-18.95	52.48	49.47	-12	37.25	20.46	4.93	-14.91	-1.66	-72.03	13.22	7.65	-22.29	41.33	2.4	25.59	-28.46	23.03	-8.83	32.75	-23.52	-30.02	-57.82	57.93	-23.35
BRD-A67981824	cefotaxime	Bacterial cell wall synthesis inhibitor	Bacterial cell wall synthesis inhibitor		Bacterial cell wall synthesis inhibitor	0	78.81	58.78	-49.87	-3.77	-4.91	60.99	73.93	78.49	15.82	21.9	20.87	4.02	44.9	88.75	-4.98	72.3	20.74	28.28	18.42	12.92	35.55	0	22.34	82.21	67.45	79.81	21.07	66.22	41.38	84.1	41.89	0	-10.13	63.89	53.47	86.83	70.1	59.81	34.53	66.89	28.97	48.63	54.16
BRD-K40213712	SAL-1	Adenosine receptor antagonist		ADORA2B, ADORA2A	Adenosine receptor antagonist	-81.53	-33.04	20.8	-48.64	-31.12	-4.79	-22.66	0	-45.49	-38.08	-29.53	-4.88	0	-17.28	-58.36	-9.15	-39.38	41.17	-40.78	5.38	-19.24	-72.51	4.23	-29.78	-34.87	3.2	-51.19	-27.1	-39.13	-14.21	-70.23	-78.93	-55.13	1.76	-35.04	31.45	-6.55	-12.13	1.44	-35.21	-31.01	-51.96	8.17	-63.59
BRD-K84639753	safinamide	Dopamine uptake inhibitor		MAOB, SLC6A3	Dopamine uptake inhibitor, Glutamate inhibitor, Monoamine oxidase inhibitor	0	-4.88	-57.82	4.05	0	-4.72	-14.69	-23.74	-63.51	-15.71	-75.2	-27.53	-4.14	-3.28	-38.63	-7.22	9.35	-3.13	-7.43	-54.64	-3.14	-40.64	39.45	-46.28	-4.32	-24.33	-54.85	-22.54	-4.9	-31.48	-59.25	-6.48	-5.43	-5.98	27.39	-43.02	5.46	-65.51	-62.04	21.92	-20.43	-81.04	16.01	0
BRD-K33551950	radicicol	HSP inhibitor	HSP inhibitor	ACLY, DLAT, HSP90AB1, HSP90B1, MAP3K7, OPRM1, PDK3	HSP inhibitor	0	-2.95	0	75.96	-29.42	-4.72	55.64	1.87	79.82	23.28	15.45	52.75	-4.83	2.15	27.02	61.18	14.36	80.6	67.6	7.61	72.81	25.87	2.86	42.34	9.6	58.53	-18.34	26.43	-44.38	14.64	-40.69	-36.22	-5.71	2.92	8.35	0	58.5	12.07	15.54	36.44	-58.69	52.79	57.82	-3.18
BRD-K49027941	PSB-1115	Adenosine receptor antagonist		ADORA2B, ADORA1, ADORA3	Adenosine receptor antagonist	0.49	16.19	-12.76	-9.1	4.75	-4.69	40.28	10.57	29.64	-8.99	11.16	-41.61	0	10.84	13.31	-12.81	-14.85	5.68	38.31	42.68	0	1.02	4.05	13.14	44.56	12.8	-6.1	-12.23	27.04	22.77	17.94	-3.75	14.38	48.38	6.1	72.97	35.46	26.18	21.22	13.88	14.72	-22.34	-13.12	8.3
BRD-K85119730	tolbutamide	ATP channel blocker		ABCC8, CYP2B6, CYP2C19, CYP2C8, KCNJ1, KCNJ11, KCNJ8	ATP channel blocker	0.02	-48.2	0.18	-0.03	-0.03	-4.69	2.64	4.31	-10.35	17.85	-26.78	-10.27	-29.32	-3.51	9.49	-7.82	-11.05	5.04	-35.52	-26.04	2.08	-12.8	-11.55	-54.32	-10.77	4.83	-29.35	-14.8	1.73	7.01	-6.22	-5.67	-6.15	43.66	-4.99	7.22	-5.69	8.9	-46.03	-18.28	-25.53	-6.71	-5.06	7.14
BRD-K67174588	toremifene	Estrogen receptor antagonist	Estrogen receptor antagonist	ESR1, CYP3A5	Estrogen receptor antagonist, Selective estrogen receptor modulator (SERM)	-4.26	-49.04	0	3.88	-1.76	-4.69	-19.78	-16.21	-17.25	-1.87	-42.93	-4.86	-24.81	-44.91	-73.92	-19.51	-9.83	-27.19	-11.74	-73.89	-10.04	-69.47	1.3	-18.62	-10.6	-48.93	-56.74	-64.81	7.36	-56.82	-18.23	6.24	-34	-19.22	-14.19	-43.38	-8.66	-33.24	-2.09	-28.56	-2.11	-24.14	-27.12	-1.11
BRD-K54472332	elvitegravir	HIV integrase inhibitor			HIV integrase inhibitor	0	84.8	-1.9	-22.37	11.34	-4.65	54.73	53.6	4.02	10.07	68.56	58	2.24	45.4	30.52	-2.82	40.01	19.35	5	44.26	9.27	-65.05	40.79	20.22	37.23	68.09	83.15	-22.71	86.8	7.12	60.77	-13.71	0	-3.56	24.81	52.31	49.17	-43.74	78.11	37.24	78.04	60.4	11.97	40.32
BRD-K28667793	pyrazinamide	Fatty acid synthase inhibitor		FASN	Fatty acid synthase inhibitor	0	-47.82	-1.52	1.99	-5.26	-4.63	22.31	18.91	-15.85	-43.63	-71.85	-35.62	-6.64	10	11.75	-11.75	-11.45	53.95	-52.44	-35.52	-5.77	-75.9	2.33	-8.58	-24.66	-6.94	-53.06	-11.47	7.97	-18.5	-73.46	-11.77	17.54	6.24	1.55	7.15	-23.73	22.72	-58.46	-7.3	8.49	-49.75	17	6.76
BRD-A20131130	2',5'-dideoxyadenosine	Adenylyl cyclase inhibitor			Adenylyl cyclase inhibitor	0.78	-43.65	-1.27	0.39	-1.2	-4.63	-1.2	-1.27	-3.55	17.6	-11.24	-7.28	1.1	1.14	0.95	-27.86	-7.58	-18.43	-68.39	-26.28	0.85	6.24	1.09	-7.93	-3.86	-11.35	-9.11	-50.77	13.82	-12.18	1.06	-25.09	-27.16	10.05	10.67	-4.85	8.81	-16.06	-10.92	13.36	8.67	-46.86	-13.99	-31.92
BRD-K74765201	tomelukast	Leukotriene receptor antagonist		CYSLTR1	Leukotriene receptor antagonist	-3.31	-14.43	-4.12	0.35	25.77	-4.62	-24.09	-19.13	-74.7	-38.46	-61.4	-54.95	-48.35	-58.62	-32.88	-13.95	-47.43	-37.66	-79.14	-72.36	-31.06	-48.43	-43.58	-60.25	-17.59	-90.39	-65.3	-8.91	-14.8	-49.97	-79	-39.27	-0.53	-39.32	1.76	-77.07	-14.47	-75.59	-31.88	-56.6	-63.83	-79.04	-65.07	-63.76
BRD-K57222227	indometacin	Cyclooxygenase inhibitor		PTGS1, PTGS2, PPARG, PTGDR2, GLO1, PLA2G2A, PPARA, PTGR2, SLC46A1	Cyclooxygenase inhibitor	-0.39	-1.73	-0.03	3.95	-0.39	-4.62	-14.62	-15.19	-50.84	-7.32	1.59	40.49	-1.8	1.8	-1.59	3.74	-1.66	8.83	0.42	-59.03	8.16	-14.43	0.42	-15.72	-5.55	1.02	-18.2	-20.87	-7.72	3.97	0.39	-12.94	-10.47	2.36	-6.26	10.95	-29.5	5.14	-0.74	-10.06	-15.81	0.28	-3.98	-9.35
BRD-K75295174	alisertib	Aurora kinase inhibitor	Aurora kinase inhibitor	AURKA	Aurora kinase inhibitor	-7.63	13.47	-1.66	-83.41	-47.92	-4.6	81.88	-21.91	19.3	-90.42	-25.53	-17.56	40.95	-80.02	-69.8	6.56	-30.75	-7.51	72.4	-93.09	27.13	-22.95	-66.14	-20.48	-21.94	34.41	-30.99	92.31	-75.26	58.45	-74.69	58.25	49.29	-12.6	-8.93	-60.64	-20.96	65.43	-31.79	-8.07	-66.61	-38.02	-35.27	65.96
BRD-A75368507	demeclocycline	Bacterial 30S ribosomal subunit inhibitor	Bacterial 30S ribosomal subunit inhibitor		Bacterial 30S ribosomal subunit inhibitor	9.33	13.16	73.4	-24.21	0	-4.49	10.97	8	11.81	47.95	33.04	38.54	-6.45	67.63	37.87	16.28	13.29	0	70.12	32.77	13.14	40.75	50.1	19.25	10.98	0	47.93	18.98	53.89	22.49	29.22	0	-18.74	27.91	8.49	36.25	21.21	-12.66	-26.77	11.63	24.72	36	5.32	35.01
BRD-K33204703	AG-370	PDGFR receptor inhibitor		PDGFRB	PDGFR receptor inhibitor	0	-58.67	-8.23	-2.26	-33.78	-4.47	-35.1	-77.67	-49.75	39.71	-81.4	-61.29	-40.51	32.92	-46.58	-47.71	-6.91	-28.49	-72.85	-93.27	-67.86	-71.53	24.52	-56.99	-47.08	-55.54	-80.03	-74.82	-7.19	-93.14	11.03	-3.17	-40.06	-52.51	-35.34	-20.5	-38.77	-39.63	13.73	-31.51	-70.05	-16.44	-66.21	-49.7
BRD-K70881766	solanine	Acetylcholinesterase inhibitor			Acetylcholinesterase inhibitor	-3.81	-33.7	-4.94	-49.5	-24.29	-4.46	-28.68	-22.62	-75.41	-2.57	-80.25	-25.07	36.3	37.44	-47.51	-62.16	-42.97	17.61	-46.97	-50.93	-23.78	-29.8	4.37	-32.18	55.62	-32.44	-4.86	-33.76	-12.96	-23.25	-46.39	-59.07	48.01	23.08	26.68	-14.59	-4.37	-43.42	-40.86	-72.68	-61.95	8.23	35.11	-29.89
BRD-K81839095	estrone	Estrogen receptor agonist	Estrogen receptor agonist	ESR1, ESR2	Estrogen receptor agonist, Estrogenic hormone	0	-3.17	-1.19	61.27	6.97	-4.41	1.59	-1.13	8.71	0.21	-4	19.47	3.05	8.37	-50.92	-11.58	-29.04	-10.07	-2.6	-6.09	-27.02	0.85	0.42	-11.79	8.32	-1.52	-1.79	-0.46	0.18	-2.18	5.3	5.29	0.4	5.42	-2.78	3.98	10.57	-13.18	9.95	-0.39	-9.95	-11.3	-6.35	-3.65
BRD-A73859745	glycodeoxycholic-acid	Apoptosis stimulant			Apoptosis stimulant	15.26	13.3	-2.71	6.56	34.7	-4.33	43.53	11.89	34.63	-18.86	-37.51	61.59	-19.7	31.59	1.06	4.36	3	-23.76	-56.78	-49.06	-13.49	8.23	-23	25.3	-9.11	-42.47	-12	-15.6	12.03	40.47	-15.84	9.93	-38.48	-47.41	-6.47	18.6	-27.2	-32.1	-17.55	24.35	17.79	32.14	31.81	53.16
BRD-K53979406	ALX-5407	Glycine transporter inhibitor		SLC6A9	Glycine transporter inhibitor	0	1.62	10.76	-20.41	0	-4.12	-0.74	-10.95	2.15	-3.31	-36.12	32.09	-1.52	10.09	-25.54	-17.16	-5.96	1.66	-16.66	-8.85	-5.37	-20.08	1.94	-4.15	12.48	-14.21	-28.88	-33.46	4.12	10.85	-8.26	5.36	-6.86	-10.42	-0.88	-22.19	-1.87	-9.53	-3.33	-17.45	9.05	-5.8	0.78	-18.47
BRD-K53123955	niridazole	Phosphofructokinase inhibitor			Phosphofructokinase inhibitor	-0.35	-17.36	-1.8	88.49	-2.25	-4.09	17.72	-15.53	19.17	1.76	-41.85	-14.78	-64.43	0.35	-14.67	-10.16	-60.91	-19.77	-50.54	-11.91	-11.28	-76.92	-13.44	-8.05	3.38	-19.62	-58.71	-6.17	3.29	-11.85	-60.74	-57.21	-22.93	-36.22	4.49	-11.19	-88.46	-46.01	-26.31	-62.62	-35.24	-14.89	-40.7	-66.77
BRD-K28029915	dolasetron	Serotonin receptor antagonist		HTR3A	Serotonin receptor antagonist	0.95	-4.23	0.25	-15.48	76.7	-4.08	19.47	12.87	34.23	-38.56	-16.97	20.1	-3.38	67.11	-17.53	-37.66	24.52	16.48	28.9	28.42	51.76	6.62	0.28	17.21	3.1	26.66	-21.65	-7.95	3.49	-9.79	40.62	-2.18	-19.19	24.56	2.33	34.11	23.82	4.23	23.89	24.73	48.64	-3.66	24.64	-27.66
BRD-K61323504	SB-225002	CC chemokine receptor antagonist		CXCR2	CC chemokine receptor antagonist	0.56	-0.78	-2.92	-0.21	85.97	-3.98	11.26	11.15	21.09	70.07	-60.79	-61.52	-36.1	3.35	-33.52	-16.16	12.9	-0.42	-95.33	31.66	17.88	24.96	0.14	69.39	12.89	-12.96	-72.12	79.29	-1.98	13.03	36.37	-85.27	26.99	79.36	9.71	-32.88	-3.46	56.67	24.87	87.66	41.63	17.5	3.95	26.27
BRD-A35989968	megestrol	Progesterone receptor agonist	Progesterone receptor agonist	PGR	Progesterone receptor agonist	-19.79	69.86	31.25	25.93	8.32	-3.97	59.08	8.25	-45.3	25.11	50.17	19.17	-18.57	9.36	34.48	33.97	24.39	43.46	14.03	69.76	46.34	28.79	7.25	50.78	-0.86	22.17	30.9	59.09	-19.09	78.78	-21.41	0.14	29.26	85.24	-19.81	6.4	11.23	42.15	27.7	-16.9	60.31	36.21	70.25	36.16
BRD-A80017228	bendroflumethiazide	Sodium/potassium/chloride transporter inhibitor		SLC12A3, CA1, CA2, CA4, KCNMA1, SLC12A1	Sodium/potassium/chloride transporter inhibitor	0	-6.31	0.04	2.3	-2.99	-3.93	-12.88	-5.85	-19.36	-0.46	-66.67	-47.24	-4.56	13.62	-21.44	-6.36	-4.46	0.18	-33.6	-39.16	-6.91	-47.03	-9.92	-8.8	-19.79	-74.96	-58.59	1.35	-4.88	-63.87	-64.08	-53.54	-0.28	-11.1	-4.67	-53.35	-4.05	-47.09	-9.03	-38.23	-26.28	-51.37	-16.63	-43.07
BRD-K54210043	NS-1619	Calcium channel activator		KCNMA1, KCNT1, KCNT2, KCNU1	Calcium channel activator	-21.1	-65.55	-21.5	1.83	-15.98	-3.92	-30.71	-0.25	-11.95	-67	-62.48	49	-4.66	-66.35	-11.95	-12.62	5.93	11.16	-81.87	-69.31	-46.73	-34.64	-1.2	17.21	-47.7	-54.7	-19.15	-41.39	-8.89	-51.02	-30.87	-33.15	-9.95	6.51	27.68	-15.32	7.01	-25.5	-19.8	-38.89	-34.23	-45.17	3.98	-37.2
BRD-K54314721	zolmitriptan	Serotonin receptor agonist		HTR1B, HTR1D, HTR1A, HTR1F, HTR1E	Serotonin receptor agonist	-10.67	-18.53	-0.28	-0.42	-1.83	-3.89	-3.52	-4.9	-82.19	-2.22	-24.02	14.78	5.51	-3.98	-9.5	-8.52	-8.12	-1.09	-39.08	-64.85	-49.92	-14.38	-2.21	-51.55	-5.57	-58.22	-21.05	-63.68	-3.89	-23.41	-1.27	-49.43	0.58	-20.8	23.44	-2.32	-12.06	-24.14	-18.05	19.06	-16.56	2.61	-3.35	-13.21
BRD-K75181824	acetyl-geranygeranyl-cysteine	Inhibitor of methyl esterification of geranylgeranylated proteins			Inhibitor of methyl esterification of geranylgeranylated proteins	-3.47	-92.18	-57.96	4.38	-46.43	-3.86	-59.46	-32.09	-66.63	-51.76	-77.6	-50.94	0	-39.84	-46.6	-57.46	-60.04	-7.29	-98.7	-20.12	-26.39	-52.93	0	-57.65	-70.68	-65.13	-48.99	-4.86	-3.82	-75.37	-52.25	-69.67	-48.96	-8.51	0	-62.69	-2.09	-86.48	0	-39.3	-68.86	-79.82	-39.21	-76.49
BRD-K34330170	rotenonic-acid	Retinoid receptor antagonist			Retinoid receptor antagonist	0	-15.66	0	-8.59	29.32	-3.84	46.17	-4.26	28.86	-7.33	45	7.61	-8.27	38.28	29.86	1.59	19.43	6.6	19.44	38.18	29.73	9.58	8.44	69.06	47.45	-15.57	-4.9	16.12	17.57	51.03	-7.75	26.54	6.65	-15.33	5.24	21.71	45.18	25.67	30.44	-57.52	-17.56	22.72	8.52	14.87
BRD-K53220666	trimetozine	Sedative			Sedative	-1.83	-9.42	-0.18	8.03	5.8	-3.76	-12	-1.87	-4.73	1.94	-5.42	4.48	3.24	9.98	13.71	14.07	1.2	3.54	-7.89	-9.77	6.28	70.56	35.21	8.19	-22.34	8.69	-5.55	-7.4	23.34	6.34	10.27	-3.96	-18.07	15.18	8.51	6.65	-2.4	-3.53	-25.72	11.72	-25.07	-9.53	-3.35	-7.16
BRD-K89930444	AG-592	Tyrosine kinase inhibitor			Tyrosine kinase inhibitor	0	17.1	0	-20.03	9.83	-3.7	91.88	67.43	33.87	1.94	16.95	33.25	3.88	-49.46	36.12	79.26	29.37	53.07	69.45	36.52	32.69	11.9	59.45	54.67	-21.58	63.55	-17.61	68.95	17.16	59.45	23.84	65.71	0	13.14	-6.9	30.4	19.79	40.83	11.57	1.8	1.69	61.83	63.33	47.71
BRD-A42628519	iopanoic-acid	Radiopaque medium			Radiopaque medium	0	-37.05	62.96	-27.43	-66.14	-3.66	-61.88	-16.49	-80.97	-60.78	-19.97	-40.31	-1.13	-17.03	-55.66	-50.08	-76.61	55.94	-35.43	0.63	-32.02	-26.93	54.45	-57.72	-22	-13.95	-6.06	-25.47	-1.66	-45.98	-25.7	-3.7	-39.61	-44.11	-1.13	19.32	22.07	-43.79	18.45	-73.87	-71.93	-43.66	8.98	-42.29
BRD-A47633927	NPC-15199	ICAM1 antagonist		ICAM1, PPARG	ICAM1 antagonist	1.02	-10.95	-1.06	-1.3	-12.78	-3.66	4.16	-5.38	-19.39	12.08	-58.36	20.61	-1.44	-10.15	-37.05	-14.6	7.85	2.69	-84.89	-36.82	-33.99	13.32	-0.78	-1.48	-47.89	-10.61	-5.12	-34.56	10.6	-43.99	-5.83	22.36	-15	5.11	10.56	-59.43	15.49	-6.39	5.82	7.2	-12.55	-6.68	25.35	-16.99
BRD-K82846253	repaglinide	Insulin secretagogue		ABCC8, CYP2C8, CYP3A5, INS, KCNJ11, PPARG	Insulin secretagogue	0.03	-15.59	0	-4	-2.54	-3.64	33.53	-25.23	-28.23	-10.09	-57.41	11.26	-1.55	-47.92	-28.77	-4.98	-75.98	-4.09	-81.01	-8.66	-36.4	-45.13	-8.26	-29.78	-66.3	-77.87	-14.87	-43.99	2.28	-25.78	-87.02	-2.11	-2.75	-4.89	-9.41	-48.5	23.53	-3.77	-63.95	-38.74	-34.1	-49.28	-15.86	-23.16
BRD-K73589401	corticosterone	mineralocorticoid receptor agonist		HSD11B1, NR3C2, NCOA1	mineralocorticoid receptor agonist	0	1.69	0	-2.33	0	-3.64	14.45	2.71	17.57	-1.97	22.3	-19.85	-1.48	-5.91	9.67	-60.51	69.77	-2.64	-40.97	-10.43	-72.56	-33.41	0	22.74	-1.76	37.22	-41.98	-2.26	-2.29	-28.8	-2.59	2.08	-2.22	-19.3	-10.85	20.04	2.57	16.34	40.07	8.56	39.04	-18.25	30.1	17.92
BRD-A09056319	alfuzosin	Adrenergic receptor antagonist		ADRA1A, ADRA1D, ADRA1B, KCNH2	Adrenergic receptor antagonist	0.74	-6.87	0.74	-0.56	-2.52	-3.59	-11.19	17.38	25.74	10.01	5.43	17.66	-14.12	14.09	21.5	-3.38	25.85	13.43	-14.1	15.05	9.94	7.62	16.75	-12.53	9.49	-11.74	6.84	2.5	5.28	24.8	15.72	-3.14	7.71	40.03	5.46	14.09	9.78	26.99	-27.22	20.78	-18.26	-11.06	9.92	15.98
BRD-K08252256	diclofenac	Cyclooxygenase inhibitor		PTGS1, PTGS2, AKR1C3, ALOX5, ASIC1, ASIC3, CYP2C8, KCNQ2, KCNQ3, PLA2G2A, PPARG, SCN4A	Cyclooxygenase inhibitor	1.87	1.06	0.25	-5.52	-3.91	-3.56	-30.48	7.4	-33.17	-8.91	-21.05	-28.03	-14.27	-16.84	6.65	-15.46	-25.55	3.14	-8.58	-46.13	-6.27	-13.07	10.17	-39.24	-0.7	-15.82	-16.95	-3.74	-41.48	25.67	-15.57	-37.89	-3.74	-17.98	-3.07	20.39	22.27	-27.31	6.71	-32.11	31.55	-27.34	8.86	-35.33
BRD-A34706053	CGP-12177	Adrenergic receptor agonist		ADRB1, ADRB2, ADRB3	Adrenergic receptor agonist	0	-9.72	-1.98	0	0	-3.56	-28.94	-1.23	-10.25	-2.18	-30.24	-21.56	0	13.16	-17.24	-13.63	4.39	-49.61	-19.38	-20.51	-1.23	5.39	-9.15	-53.85	-21.22	13.19	-24.47	-29.87	-16.89	-3.42	-1.4	-22.37	-8.95	-11.27	11.48	-29.8	7.27	-23.36	-32.79	13.08	-16.82	-12.4	-2.11	4.49
BRD-K65285700	BRD-K65285700	Cannabinoid receptor agonist	Cannabinoid receptor agonist	CNR2	Cannabinoid receptor agonist	-0.63	1.3	-4.42	-11.48	0	-3.52	8.81	10.61	7.43	-1.13	-7.09	1.06	-35.06	-10.11	0.88	3.93	-22.69	0.74	-3.56	-0.81	0.72	-6.97	-31.62	0	-7.24	21.79	1.8	-12.72	23.32	10.5	-0.88	10.78	35.1	-0.81	-0.95	-17.19	44.76	-0.6	6.73	-56.69	21.44	-2.5	0.7	-1.13
BRD-K41903098	diphenoxylate	Opioid receptor agonist		OPRM1, OPRD1	Opioid receptor agonist	0	0.14	9.99	-4.3	-23.68	-3.49	16.75	1.69	-42.23	-29.94	12.24	2.78	-27.45	9.55	-2.82	-7.18	7.45	-17.87	13.34	5.9	-19.63	1.66	-3.07	-42.27	-0.74	38.33	-0.93	-12.22	7.28	-5.42	0.32	12.35	12.83	-19.29	-0.67	-22.07	-8.21	7.31	-18.3	-64.48	-8.24	-35.53	-10.35	19.54
BRD-A49225603	alimemazine	Histamine receptor agonist		HRH1	Histamine receptor agonist	1.26	-1.16	1.26	-70.37	-9.31	-3.49	40.52	-3.63	23.76	5.21	3.52	12.33	4.28	-37.06	4.09	1.77	69.44	-10.99	2.5	-1.97	43.71	-65.28	-30	5.19	27.16	50	-8.74	-25.56	21.61	13.08	-6.59	28.16	3.21	-8.8	12.05	1.02	-31.61	33.79	3.77	38.44	-4.21	10.09	-27.21	14.91
BRD-K96471533	nitazoxanide	Pyruvate ferredoxin oxidoreductase inhibitor			Pyruvate ferredoxin oxidoreductase inhibitor	0.14	72.82	3.81	-5.48	1.76	-3.47	58.88	63.66	35.22	12.31	45.93	83.5	0	23.86	42.38	52.78	48.72	18.11	48.17	83.09	37.84	13.26	-17.57	48.07	42.63	91.13	11.09	76.74	51.73	69.98	24.02	47.43	47.16	12.99	-50.58	1.06	5.55	69.24	37	43.64	60.24	78.33	20.99	79.12
BRD-K11905747	spectinomycin	Bacterial 30S ribosomal subunit inhibitor	Bacterial 30S ribosomal subunit inhibitor		Bacterial 30S ribosomal subunit inhibitor	0	-27.59	0	-14.04	42.25	-3.45	-37.53	-25.64	-64.45	-78.42	-45.83	-62.2	-17.24	-43.14	-22.72	-83.74	-4.23	-8.33	-9.83	-52.25	-58.91	-33.39	-51.91	-65.49	-64.63	-87.32	-59.04	7.43	-34.96	-26.11	-42.39	0	0	-17.29	-3.96	-58.77	-40.7	-34.77	-21.25	-34.66	-83.15	-82.74	-35.39	-89.22
BRD-K50324045	avrainvillamide-analog-6	nucleophosmin inhibitor	Nucleophosmin inhibitor	NPM1	nucleophosmin inhibitor	0	-0.63	0	4.76	1.23	-3.45	5.87	2.7	17.09	-0.56	-13.78	6.81	-3.69	-0.57	27.37	4.95	33.52	17.95	14.87	-8.81	-0.99	-3.03	0	-33.77	0	5.95	-13.16	10.58	-4.98	-19.15	10.43	-0.92	-1.02	61.99	22.18	-18.16	29.52	-33.21	-7.07	13.5	2.85	2.33	28.59	-12.47
BRD-K41996876	tyrphostin-1	EGFR inhibitor		EGFR	EGFR inhibitor	-0.49	-37.22	-0.35	14.41	2.47	-3.42	24.46	2.08	17.01	2.78	-14.11	16.58	-0.32	-4.55	-7.68	-13.4	9.46	56.33	-45.44	-38.25	-5.46	-37.09	39.47	-23.16	0.34	-46.33	-83.22	-59.69	36.86	-22.66	53.16	-53.39	-8.86	26.34	1.66	12.61	2.96	-12.61	-9.68	75.11	-44.26	-41.37	27.04	19.61
BRD-K12079898	PD-160170	Neuropeptide receptor antagonist		NPY1R	Neuropeptide receptor antagonist	8.86	4.39	3	-5.05	2.43	-3.38	13.26	NaN	3.48	-8.45	-8.95	5.83	-52.73	0.25	39.88	61.2	-30.92	90.84	-12.49	9.98	-1.66	-8.42	8.78	53.12	1.06	15.85	-16.64	6.63	29.52	-16.23	-1.13	0.67	-19.67	20.08	81.22	-11.11	21.4	10.75	7.39	-41.95	6.94	10.82	12.63	-19.4
BRD-K73395020	SA-1478088	-666		MMP12, MMP14, MMP2, MMP8, MMP9	-666	0.14	82.43	9.7	34.2	-0.67	-3.38	86.3	46.68	79.66	0.56	38.03	54.77	-0.53	-61.58	30.04	83.23	66.35	62.47	47.39	65.44	72.34	11.28	0.07	50.26	24.28	79.77	28.85	77.5	-1.38	73.32	0.11	89.89	-0.7	-19.26	-10.5	70.55	0.14	80.06	78.52	4.93	67.1	67.7	4.55	61.18
BRD-A54880345	etomidate	GABA receptor modulator		GABRA1, ADRA2B, GABRA2, GABRA3, GABRA4, GABRA5, GABRA6, GABRB1, GABRB2, GABRB3, GABRD, GABRE, GABRG1, GABRG2, GABRG3, GABRP, GABRQ	GABA receptor modulator	-0.14	-25.88	-0.92	-1.59	-7.42	-3.35	4.26	9.75	-36.45	-23.66	-62.3	-11.63	4.17	5.01	-69.25	-8.99	-26.37	3.18	-47.63	-20.21	14.88	21.97	-0.49	-23.01	-15.84	-26.01	-13.57	-11.63	-27.77	-55.06	-12.26	-7.96	-3.75	-6.21	4.94	-14.67	2.71	-26.12	-3.1	11.26	-25.3	-62.17	-7.69	3.98
BRD-K36529613	PU-H71	HSP inhibitor	HSP inhibitor	HSP90AA1	HSP inhibitor	12.18	10.9	2.35	-57.84	0	-3.32	37.33	3.21	-13.37	-54.42	15.59	-3.42	-3.99	-10.9	14.66	-40.65	18.3	38.75	-13.54	-47.67	16.38	-57.94	19.44	-28.49	-27.71	46.12	-42.79	-41.55	-74.55	25.57	-40.57	-18.11	13.46	2.04	-3.14	11.98	16.03	19.42	-1.97	-46.67	-79.91	19.44	-39.8	7.49
BRD-A02990301	lofexidine	Adrenergic receptor agonist		ADRA2A	Adrenergic receptor agonist	0	-6.13	0	-7.93	-24.44	-3.31	-41.13	-2.4	9.31	-77.91	-0.53	-54.83	-3.23	-2.35	-33.99	-35.37	-4.16	55.63	9.49	-36.74	-3.35	9.86	3.61	19.44	0.32	13.9	2.61	-45.77	3.14	3.49	22.1	-9.34	2.68	58.1	-23.76	4.82	10.72	-3.77	-2.68	7.28	3.17	-10.54	2.4	-11.04
BRD-K32977963	eugenol	Androgen receptor antagonist		AR, MAOA	Androgen receptor antagonist	2.38	-19.17	-9.29	12.99	55.07	-3.28	3.6	-54.55	-17.16	1.73	15.59	-9.02	-83.56	-30.96	-7.64	-5.86	-40.9	-23.42	-39.54	-49.47	-15.57	-16.78	-50.06	-9.29	-10.23	-47.62	-34.84	-4.61	0	-76.97	-54.69	-49.81	-10.51	23.96	-49.21	3.81	-44.92	-5.88	-62.47	-7.95	3.1	-14.26	-8.35	-9.86
BRD-A93659613	GR-89696	Opioid receptor agonist		OPRK1	Opioid receptor agonist	0.63	-12.36	0.02	-4.69	-2.07	-3.26	-53.91	0.7	-35.5	-18.95	-36.54	26.49	-7.99	5.36	-25.91	6.72	14.32	2.21	-16.86	-41.68	26.6	23.49	9.55	-20.27	-3	6.13	-30.21	-2.29	6.23	-5.77	-1.23	-6.33	-2.84	19.52	5.78	-55.42	13.88	35.07	8.01	50.08	-0.67	17.44	8.83	15.59
BRD-K68095457	palmitoylethanolamide	Cannabinoid receptor agonist	Cannabinoid receptor agonist	CNR2, GPR119, GPR55	Cannabinoid receptor agonist	-11.98	-66.83	-3.29	2.33	-3.07	-3.24	-38.93	-1.77	-89.21	-49.42	-31.89	-33.05	-51.94	5.64	-71.39	-78.01	-95.3	-43.67	-69.8	-93.44	-69.08	-76.05	11.66	-86.41	-65.04	-82.19	-49.82	-31.75	-9.93	-79.01	-32.67	-23.16	-16.87	-52.48	0	-78.45	-2.3	-89.75	-83.4	-40.12	-42.06	-78.26	-32.42	-81.18
BRD-A19633847	perhexiline	Carnitine palmitoyltransferase inhibitor		CPT1A, CPT2	Carnitine palmitoyltransferase inhibitor	0	80.85	0.25	-35.88	-30.83	-3.24	92.14	73.79	87.2	1.44	68.13	78.4	-25.13	-6.35	71.68	72.84	55.99	-17.11	92.75	86.92	87.94	33.27	-1.83	42.77	31.81	92.94	72.24	49.82	10.73	90.24	50.08	89.51	-3.81	-6.3	0.39	45.97	74.35	91.01	85.04	77.27	76.54	91.68	38.13	87.18
BRD-K82484965	carmoxirole	Dopamine receptor agonist		DRD2	Dopamine receptor agonist	17.77	-52.01	-1.16	6.72	-23.71	-3.23	-30.86	-2.29	-36.52	-22.81	-18.26	-19.68	-24.95	0	-37.06	-23.54	-65.7	-31.79	-17.1	-56.99	-30.8	-19.24	-12.43	-22.01	-45.23	-38.75	-35.52	-36.02	1.44	-48.12	-19.42	-48.64	-57.21	-26.36	-11.5	-26.56	-7.57	-28.65	-27.98	-27.22	-23.98	-23.56	-37.78	-4.87
BRD-K06080977	eicosatetraynoic-acid	Cyclooxygenase inhibitor		ALOX12, PPARA, PPARG, PTGS1	Cyclooxygenase inhibitor, Lipoxygenase inhibitor	-4.09	-70.64	-22.07	83.57	-22.77	-3.21	-73.96	-3.3	-96.25	-13.46	-54.99	-43.08	4.16	-24.33	-65.93	-42.46	-94.22	-46.91	-22.47	-87.62	-22.41	-61.82	0	-87.09	-31.38	-95.49	-68.07	-69.39	-10.81	-73.05	-47.32	-8.35	-35.83	29.42	-21.22	-48.99	3.7	-91.25	-40.25	-70.66	-63.38	-39.81	-48.83	-81.48
BRD-K71103788	duloxetine	Serotonin reuptake inhibitor		SLC6A2, SLC6A4, SLC6A3, HTR2A, HTR2C, HTR6	Serotonin reuptake inhibitor, Norepinephrine reuptake inhibitor	NaN	-1.83	0.14	-9.73	-0.99	-3.14	-8.9	-16.67	-32.66	0.91	-30.02	-2.71	-2.84	-78.31	-21.18	27.57	-5.07	20.41	29.92	19.68	-22.65	-80.18	0.99	-82.9	0.35	-4.58	-13.38	-3.09	-9.6	-13.34	-3.77	13.05	-1.27	4.68	NaN	0.99	-2.96	36.42	-2.43	49.64	-13.91	-1.8	-2.52	2.57
BRD-K73319509	PF-04217903	c-Met inhibitor		MET	c-Met inhibitor	-2.13	-70.6	-9.55	0	15.64	-3.14	21.68	59.58	9.28	5.88	23.56	10.31	68.4	28.05	48.96	2.64	13.71	33.27	-24.99	15.42	-45.82	31.45	23.03	15.83	51.66	14.92	30.43	-6.94	23.99	22.63	62.54	-11.2	40.63	24.63	50.79	54.6	-2.08	-24.26	31.48	29.97	20.97	-15.78	47.09	24.68
BRD-A62035778	scopolamine	Acetylcholine receptor antagonist		CHRM2, CHRM1, CHRM3, CHRM4, CHRM5, SI	Acetylcholine receptor antagonist	0	-78.03	-3.07	-30.39	2.68	-3.1	52.34	-1.23	-80.94	-23	-56.24	-70.68	-24.25	1.4	-41.07	-74.54	-56.46	-84.92	-21.51	-86.56	-56.29	-50.58	-18.31	-69.53	-14.05	-68.24	-8.86	-82.68	1.23	-65.24	-3.07	-27.88	1.34	-82.83	31.51	-15.41	2.08	-51.15	13.11	39.1	-84.36	-59.06	-39.92	-77.42
BRD-K54987996	CAY-10578	Casein kinase inhibitor			Casein kinase inhibitor	1.97	-21.65	-4.58	0	0	-3.1	37.99	41.19	-27.61	58.14	26.05	21.33	-4.48	21.51	11.46	16.48	22.5	11.43	-36.59	6.26	18.06	26.31	-17.81	20.28	-22.79	12.86	-14.74	2.08	0	25.79	69.67	4.57	-18.47	-8.17	18.47	-13.61	18.55	-8.03	45.73	21.14	-16.16	-15.47	-8.19	14.93
BRD-A51393488	noscapine	Bradykinin receptor antagonist		BDKRB2, SIGMAR1	Bradykinin receptor antagonist, Tubulin inhibitor	0	1.69	0	-11.02	-2.33	-3.08	-40.29	-53.58	-63.64	-65.19	-62.23	-60.25	-27.24	-32.9	-60.09	-33.65	-57.71	43.35	-92.4	-71.51	-39.11	-76.84	1.97	-53.7	-30.06	-56.02	-62.95	-31.74	-35.39	-4.72	-83.58	-30.45	-31.82	-23.6	-22.25	-42.34	-76.17	-68.58	-60.44	3.14	-34.46	-38.64	-4.47	-56.07
BRD-K70301876	escitalopram	Selective serotonin reuptake inhibitor (SSRI)		SLC6A4, ADRA1A, CHRM1, CYP2C19, HRH1, SLC6A2, SLC6A3	Selective serotonin reuptake inhibitor (SSRI)	0	-3.41	-0.46	-4.58	-11.72	-3.06	-20.66	-4.2	-48.44	-17.62	-14.76	-6.3	-9.99	-6.03	-35.08	-50.92	-15.24	-14.27	-11.29	-61.64	24.85	-36.62	2.86	-76.02	-59.91	-28.93	-14.73	-59.89	4.95	-56.3	-23.72	-29.22	-6.8	-25.62	0.49	-12	20.01	-9.33	-8.63	-14.34	-12.05	-12.86	-25.83	-29.2
BRD-K12516989	zaprinast	Phosphodiesterase inhibitor		PDE5A, GPR35, PDE1A, PDE4D, PDE9A	Phosphodiesterase inhibitor	0	-1.94	0	-1.73	0	-2.94	-33.85	-18.26	-64.06	-2.61	-56.13	-2.92	14.08	-18.4	10.72	0	-82.54	8.13	-36.11	-71.48	-13.56	-51.48	-16.3	46.66	-42.02	-88.58	-88.78	-36.07	-24.12	-25.38	-30.23	-57.16	-28.72	12.81	2.13	-74.85	-2.92	-42.15	6.24	2.96	-59.93	-42.25	15.68	-50.92
BRD-U86922168	QL-XII-47	BTK inhibitor		BMX, BTK	BTK inhibitor, Cytoplasmic tyrosine protein kinase BMX inhibitor	12.19	34.72	6.7	-85.52	0	-2.92	82.35	4.58	5.67	-66.89	0	34.38	78.23	-4.33	83.57	79.55	14.82	-5.25	58.25	45.84	15.68	-5.74	-94.87	19.06	-36.6	50.39	26.68	82.34	0	27.66	-4.19	86.03	-22.97	-24.23	-4.79	31.68	25.44	51.51	30.44	74.18	4.37	34.72	0	-5.99
BRD-A07395371	esmolol	Adrenergic receptor antagonist		ADRB1	Adrenergic receptor antagonist	-0.76	-76.54	-2.52	5.79	-2.62	-2.89	-64.79	-4.33	-91.23	0.32	-62.5	-29.7	-31.07	13.21	11.65	-66.63	-35.56	-14.33	-76.06	-60.43	3.68	-58.13	19.58	-99.79	-55.15	-97.2	-37.69	-16.03	52.29	-62.09	49.06	-20.53	6.84	-19.35	-52.33	-46.13	5.81	-96.1	-16.33	-72.26	-55.66	-75.57	-3.64	-81.15
BRD-K34154330	tracazolate	GABA receptor modulator		GABRA1	GABA receptor modulator	-0.39	-9.72	0.39	-11.42	17.78	-2.88	10.74	21.54	-2.54	0.42	-17.06	4.9	-38.89	-1.8	-6.2	2.22	13.76	3.07	1.8	2.89	-10.49	12.53	-2.5	-6.42	6.87	5.75	-58.1	2.54	-11.49	2.36	2.85	22.44	0.42	11.86	-12.5	-5.79	54.45	37.28	24.36	8.62	12.07	-9.6	-69.72	-10.92
BRD-K66956375	oleoylethanolamide	Cannabinoid receptor agonist		CNR1, GPR119, GPR55, KCND3, PPARA	Cannabinoid receptor agonist, Glucose dependent insulinotropic receptor agonist, Potassium channel blocker, PPAR receptor agonist	-4.42	-52.56	-2.85	2.57	-5.85	-2.85	-14.98	1.15	-27.95	1.67	-31.02	-5.39	14.84	0	-19.68	11	-66.07	-38.19	-2.54	10.55	-0.88	1.52	-32.76	-33.4	-13.14	-72.34	-87.3	-18.3	-27.56	-53.8	-57.89	-21.97	-3.68	-41.53	-1.44	-31.17	-2.82	-40.53	-1.65	-30.05	-44.88	-36.51	2.92	-18.66
BRD-A09925278	etilefrine	Adrenergic receptor agonist		ADRA1A, ADRB1	Adrenergic receptor agonist	0.67	-14.34	-5.05	13.95	-38.98	-2.85	17.64	25.62	-4.72	-4.3	4.83	21.69	77.87	9.4	48.7	-37.1	40.05	4.7	-24.1	29.58	16.25	16.69	30.94	29.04	-7.03	20.2	33.37	-45.2	25.01	7.04	11.62	22.51	6.8	0.45	58.32	-3.1	42.9	-4.73	12.37	6.62	-18.2	-38.82	8.54	12.61
BRD-K82143716	flucytosine	Antifungal		DNMT1	Antifungal	0.53	1.36	95.35	-96.77	-56.03	-2.82	-23.42	-1.2	-87.37	-72.32	-85.54	1.2	-87.15	-86.59	-4.26	-85.6	-70.53	-3.95	-83.69	-58.53	-83.21	-91.25	-51.46	-79.21	-47.1	-10.31	-61.62	24.27	-36.62	-73.88	-28.49	2.42	-28.97	-37.35	-24.24	-47.44	-20.95	-29.08	-68.98	8.63	17.42	-71.53	1.02	-46.31
BRD-A50684349	fenoldopam	Dopamine receptor agonist		DRD1, ADRA1A, ADRA1B, ADRA1D, ADRA2A, ADRA2B, ADRA2C, DRD4, DRD5	Dopamine receptor agonist	-0.93	-13.72	-3.17	1.62	8.32	-2.82	-8.09	-1.27	-36.31	13.82	-12.13	-5.57	1.73	20.27	2.4	-18.12	-22.79	24.5	16.46	-16.24	1.55	5.43	-1.62	-11.61	2.71	-22.12	-14.11	-33.92	16.26	-17.1	1.73	-13.83	-1.37	38.01	-6.53	-7.83	25.9	-20.67	-64.36	-13.57	-29.27	-62.58	31.34	-20.72
BRD-A50675702	fipronil	GABA gated chloride channel blocker			GABA gated chloride channel blocker, Chloride channel blocker	5.73	13.97	4.79	-2.1	10.28	-2.68	33.83	72.61	63.04	61.94	2.65	57.96	36.46	9.88	40.21	45.62	84.72	26.68	-13.49	70.12	18.07	71.68	23.98	68.11	20.02	71.15	5.42	29.94	21.4	43.96	54.09	51.2	51.34	42.47	23.17	76.73	27.47	4.75	-9.05	32.57	71.73	61.11	42.53	67.13
BRD-K77998258	ganglioside	SRC activator			SRC activator	-2.13	-24.3	-41.93	-2.29	3.07	-2.63	-39.3	-59.23	-43.22	-2.4	-64.52	-29.99	-46.14	-2.29	-39.73	-51.17	-23.65	-33.99	-85.97	-40.53	1.59	-54.69	23.58	-63.61	-3.14	-58.75	-18.3	-60.65	-20.25	-43.28	-17.15	-2.65	-54.73	-53.56	-43.91	-34.22	19.37	-23.65	-12.49	-23.16	-56.63	-51.38	-16.94	-38.85
BRD-K21520694	sulfacetamide	PABA antagonist			PABA antagonist	7.4	-34.7	10.87	2.83	-5.32	-2.61	-23.04	-26.08	56.17	-63.95	21.67	-6.1	-6.31	3.28	13.82	-16.42	-43.98	-9.77	-57.31	-27.26	-26.28	17.71	20.79	-42.21	-19.76	17.97	-69.31	-14.96	28.7	-35.31	-9.87	-23.01	-12.2	4.83	-11.91	32.88	0	14.05	-17.1	42.17	11.43	-41.9	-21.86	-62.42
BRD-K37848908	ceforanide	Penicillin binding protein inhibitor			Penicillin binding protein inhibitor	0	-11.1	0	-1.8	15.11	-2.57	21.93	-13.01	-63.01	21.43	-59.1	24.03	0	-21	-3.17	-2.04	-43.16	-58.45	-11.1	-18.38	-25.39	-42.03	-2.75	-23.37	-64.21	-44.82	-7.5	-56.24	1.62	-55.44	39.45	34.2	21.01	-19.77	32.57	2.43	-22.63	-2.42	-11.02	1.81	-2.89	-44.73	-27.1	-29.18
BRD-K84709232	caffeic-acid	Lipoxygenase inhibitor		ALOX5, MIF, RELA, TNF	Lipoxygenase inhibitor, HIV integrase inhibitor, NFkB pathway inhibitor, Nitric oxide production inhibitor, PPAR receptor modulator, TNF production inhibitor, Tumor necrosis factor production inhibitor	-11.8	7.51	2.08	0	2.29	-2.56	79.92	56.37	21.17	61.07	60.16	74.21	27.11	-28.41	23.98	83.46	-7.28	64.96	63.24	44.03	52.7	14.32	2.93	45.83	16.27	52.35	-41.06	48.59	1.94	79.31	24.44	89.5	-34.59	40.31	-34.09	45.67	-27.08	39.73	74.34	18.68	-10.53	69.9	-31.43	63.06
BRD-A46186775	hydrocortisone	Glucocorticoid receptor agonist	Glucocorticoid receptor agonist	ANXA1, NOS2, NR3C1, NR3C2	Glucocorticoid receptor agonist	2.6	-3.19	-1.48	-61.61	-29.45	-2.55	-3.17	-58.57	-39.76	-80.23	-50.51	14.78	-51.6	-24.24	-37.15	-63.75	-11.98	16.95	11.18	-38.21	-8.03	-32.25	-4.47	-14.33	-18.4	-2.4	-33.38	-40.13	-11.87	-53.29	-40.7	-5.02	1.48	-25.75	-6.77	-51.44	-12.46	-15.5	-0.85	-35.56	-13.26	-2.36	60.07	-9.97
BRD-K10974103	diloxanide	Protein synthesis inhibitor			Protein synthesis inhibitor	0.18	0.21	0	-0.67	-1.52	-2.54	-14.88	-4.16	2.4	0.25	-24.41	3.77	0.39	-11.72	9.68	3.89	5.94	-6.52	-0.95	-7.71	48.55	0.39	6.23	-1.69	0.95	3.35	6.07	-0.74	-0.25	0.92	1.68	1.23	0.21	-2.89	0.25	3.35	8.13	-6.53	-3.66	-6.37	45.23	2.24	-17.04	-13.65
BRD-K68191783	ALW-II-38-3	Ephrin inhibitor		DDR1, EPHA2, EPHA4, EPHB2, EPHB4, EPHB6	Ephrin inhibitor	3.96	71.46	3.88	-99.05	-2.04	-2.54	38.85	2.39	15.27	-15.01	-5.39	-65.51	-0.95	3.84	15.05	-46.81	29.76	-69.72	35.1	-54.47	-34.37	-51.88	-28.21	-74.67	11.15	15.64	-47.48	-20.73	54.99	-18.76	-26.24	-0.99	-2.01	-70.24	59.87	-4.05	-4.52	40.84	6.29	29.69	45.86	-62.05	-63.92	-29.87
BRD-K48722258	dilazep	Adenosine reuptake inhibitor		SLC29A1, CACNA1C	Adenosine reuptake inhibitor	-9.53	37.14	2.68	-45.07	-4.78	-2.52	-20.83	-51.24	-2.18	-75.71	-3.54	-82.34	-25.62	-56.97	-44.82	-23.57	-18.42	-60.49	57.02	-9.55	-17.33	-21.05	-97.74	-40.33	-1.19	18.71	13.27	-50.27	1.06	1.71	-11.16	-3.84	-5.39	-80.78	-55.42	-2.32	1.23	3.81	7.06	-16.46	-5.99	1.06	-38	-41.62
BRD-A80502530	cinobufagin	ATPase inhibitor	ATPase inhibitor	ATP1A1, ATP1A2, ATP1A3, ATP1A4, ATP1B1, ATP1B2, ATP1B3, ATP1B4, FXYD2	ATPase inhibitor	1.65	28.16	1.73	-75.61	2.01	-2.51	54.8	-7.92	51.18	-82.67	0	63.36	0	-4.1	35.79	25.51	19.38	-3.74	72.87	-24.44	-18.16	-18.73	-93.83	26.66	-73.75	26.39	28.87	75.49	-8.98	2.43	-31.21	51.43	-24.04	2.92	2.22	19.31	38.18	56.33	7.29	-15.8	33.05	41.8	10.08	-29.38
BRD-A19053259	pseudopelletierine	Anthelmintic			Anthelmintic	1.52	-74.83	2.5	8.26	-1.66	-2.5	-27.68	13.08	-25.06	2.71	-45.65	-36.27	1.73	32.43	-43.09	-23.3	-29.96	-17.8	-84.9	-73.62	-59.07	-18.92	30.69	-15.27	-55.86	-68.47	-34.29	-16	-9.43	-55.27	-45.74	-25.52	-17.4	-13.09	2.57	9.94	-14.95	-45.97	-41.96	-20.35	-71.3	-27.6	-42.64	-71.36
BRD-K15616905	CCCP	Mitochondrial oxidative phosphorylation uncoupler			Mitochondrial oxidative phosphorylation uncoupler	62.41	81.28	64.59	-71.57	-1.2	-2.5	78.76	69.09	73.82	-8.12	67	56.59	0	-13.32	47.18	80.41	53.6	1.41	68.76	77.93	79.67	65.16	-45.64	46.55	-7.94	83.17	58.53	71.57	25.04	73.06	3.73	44.02	0	22.58	-2.75	51.26	53.36	57.25	33.5	46.8	41.23	79.34	65.08	72.32
BRD-K80738081	resveratrol	Cytochrome P450 inhibitor		PTGS1, PTGS2, SIRT1, APOA1, BACE1, CSNK2A1, MAOA, NQO2, SCN5A, TXNRD1, TXNRD2, XDH	Cytochrome P450 inhibitor, SIRT activator	-1.94	-71.54	-3.31	12.12	-0.73	-2.47	-67.67	-1.76	-89.71	1.94	-38.54	-32.36	-3.28	-2.47	-5.01	-11.93	-84.4	-57.78	-16.1	-24.7	-55.37	-34.52	-2.89	-82.43	-2.43	-67.73	-90.03	-8.43	-1.97	-10.48	-11.94	-5.85	-4.76	-40.8	-11.45	-8.11	-43.78	-95.66	-48.6	-42.53	-21	-70.78	-26.35	-84.49
BRD-K34441861	moexipril	ACE inhibitor		ACE, ACE2	ACE inhibitor	-7.9	-29.26	-29.14	0.85	-36.61	-2.43	-1.73	-40.83	-7.38	-35.86	-26.73	-48.46	-22.14	-50.73	-16.96	-15.6	-11	-35.88	-16.81	-52.55	-6.77	19.8	-13.91	-56.74	-64.26	-36.63	-67.3	-59.31	21.33	-36.81	-63.89	-6.06	-53.46	-83.15	-12.11	-33.94	9.86	-37.75	-14.15	-31.93	-47.42	-78.99	-32.09	-85.61
BRD-K40990712	hexamethyleneamiloride	Sodium/hydrogen antiport inhibitor		GNRHR, ADRA2A, GNRH1, PLAU, SLC9A1	Sodium/hydrogen antiport inhibitor	0	10.62	0	0	-2.22	-2.43	-8.13	59.65	-6.68	-12.52	24.19	2.53	-2.29	33.66	-20.19	-10.28	1.73	15.82	13.59	51.93	-9.42	2.68	1.66	-13.58	2.5	22.56	-6.66	-2.54	-2.57	40.78	-15.34	-2.57	-3.1	17.34	7.63	16.45	-2.44	8.8	-10.91	2.52	-17.73	-12.48	-18.68	34.23
BRD-K63792901	arecaidine	Acetylcholine receptor agonist		CHRM1, CHRM2, CHRM3, CHRM4	Acetylcholine receptor agonist	-34.92	-67.55	-32.44	22.76	0	-2.43	3	-69.92	2.61	-7.96	-26.4	-44.46	-1.46	-13.1	-11.95	-12.33	13.03	1.16	-37.18	-18.67	-6.51	-14.31	36.76	-10.76	-5.57	-2.43	-48.29	-92.37	0.95	-8.2	-78.05	-12.82	-19.47	7.83	-56.48	-11.12	-39.62	-5.57	-27.89	-12.38	-44.45	-67.58	-19.81	-38.6
BRD-K23204545	busulfan	DNA inhibitor			DNA inhibitor	0	2.47	-2.47	2.25	0	-2.43	23.81	43.32	76.83	52.44	20.99	30.26	3.49	35.42	44.68	29.57	60.51	47.07	5.78	72.9	27.65	-25.6	4.12	73.31	26.78	40.15	15.43	-21.96	43.81	22.96	58.19	18.38	4.86	14.64	12.9	47.03	29.87	78.69	0	72.66	58.1	15.54	29.88	53.33
BRD-K62221994	T-98475	Gonadotropin releasing factor hormone receptor antagonist		GNRH1, GNRHR	Gonadotropin releasing factor hormone receptor antagonist	13.48	82.4	17.87	-58.81	-6.76	-2.43	82.67	19.82	47.89	2.43	2.64	70.82	-23.46	-58.14	24.24	67.45	86.72	33.48	67.31	72.84	62.33	-18.85	-2.5	52.75	34.53	81.24	57.71	28.59	0	76.17	18.78	42.83	-34.99	15.49	0	37.58	41.18	81.11	77.2	51.49	56.95	68.08	59.96	76.3
BRD-A48809242	IB-MECA	Adenosine receptor agonist	Adenosine receptor agonist	ADORA3, ADORA1, ADORA2A, ADORA2B	Adenosine receptor agonist	0	-63.07	-22.31	29.93	-11.92	-2.36	-46.58	-50.1	-2.29	-45.18	-77.43	-49.19	-16.37	-35.34	-87.6	-76.69	-27.38	2.15	-17.47	-68.52	-49.54	-86.3	-6.25	-74.11	-31.46	-74.79	-50.7	-93.38	1.09	-36.4	-45.41	-66.77	-27.03	-26.66	-10.87	-61.48	-59.28	-56.9	-19.66	1.09	-19.58	-37.93	-8.12	-67.29
BRD-K96354014	nifedipine	Calcium channel blocker		CACNA1C, CACNA1D, CACNA1S, CACNA2D1, CACNA1F, CACNA1H, CACNB2, CALM1, CYP3A5, GLRA1, GLRA3, GLRB, KCNA1, KCNA5, NR1I2, TRPM3	Calcium channel blocker	-0.02	-5.81	0.02	2.47	8.12	-2.33	-29.17	-71.67	-81.35	-2.4	-20.41	-28.34	0.78	12.71	-40.94	-4.1	-65.47	-0.53	-74.08	-61.74	-34.75	2.08	-10.35	-50.15	-43.14	-76.85	-62.3	-1.2	-0.81	-76.59	-12.87	-1.48	-0.03	-69.49	-12.86	-8.88	-0.49	-88.13	-13.4	-81.19	-57.32	-72.36	-46.66	-46.78
BRD-K89152108	liothyronine	Thyroid hormone stimulant		THRA, THRB	Thyroid hormone stimulant	-1.69	-39.87	0	-8.25	-37.24	-2.27	-1.55	-40.47	-22.43	3	-14.89	4.92	40.84	-11.9	66.09	1.94	-39.89	-33.1	-18.35	-42.58	3.56	34.75	-55	-12.26	-23.48	-29.88	-49.53	-3.56	-7.16	-16.37	-17.29	1.3	-0.49	-77.76	18.32	-20.61	6.76	-55.63	14.87	-44.84	-54.01	-17.42	-0.46	-35.91
BRD-K62289640	lylamine	Cannabinoid receptor agonist		CNR1	Cannabinoid receptor agonist	68.22	67.2	67.46	-78.37	-59.41	-2.26	80.55	17.49	78.75	2.4	29.08	56.05	-46.81	-47.17	67.28	47.1	74.32	19.62	81.99	57.68	80.61	36.36	0	15.36	2.5	82.32	47.93	-26.15	13.03	67.77	6.09	73.4	-22.03	-7.56	0	39.39	29.05	84.78	79.19	67.2	24.41	81.93	52.51	69.59
BRD-K94920105	DR-2313	PARP inhibitor		PARP1, PARP3	PARP inhibitor	0	19.45	-0.18	-0.96	0	-2.24	4.12	-0.21	8.32	6.13	-5.68	-0.67	0	19.62	-5.02	-0.6	-7.54	10.83	-53.92	8.65	0.28	-2.09	-9.16	9.12	12.51	22.88	-8.76	-14.48	-0.35	-7.06	0.49	-3.28	-4.23	76.97	0.28	-7.61	-3.06	1.55	-3.31	50.1	-4.28	-14.32	26.7	19.86
BRD-K49448285	bisindolylmaleimide	CDK inhibitor	PKC inhibitor	CCND1, CDK4, LRRK2, PDPK1, PIM1, PRKCA, PRKCB, PRKCI, PRKCZ	CDK inhibitor	24.19	2.11	3.92	-0.32	-0.46	-2.22	-3.31	4.19	3.51	2.27	-22.65	4.35	0.63	25.7	4.34	21.17	-23.91	14.03	3.18	2.9	-49.84	-49.67	-23.03	8.45	28.51	12.7	33.23	29.65	-23.16	16.26	-20.56	0	-11.81	31.09	-89.78	-2.61	-11.79	16.68	40.6	-30.65	1.87	5.07	51.23	22.85
BRD-K05977823	tenovins	SIRT inhibitor		SIRT1, SIRT2	SIRT inhibitor, TP53 activator	-11.48	-2.32	-3.31	-47.44	-66.04	-2.18	-19.97	-16.86	-8.54	0	14.82	10.27	-2.01	-1.76	-33.82	-49.88	0.92	-16.15	-6.7	58.41	66.41	13.17	3.15	6.99	-9.27	13.76	-42.35	-24.46	-53.51	3.35	9.85	-1.94	-3.03	-2.96	-17.05	-2.08	-3.38	30.04	36.94	0	17.18	-28.63	13.16	-7.73
BRD-K82983861	GW-0742	PPAR receptor agonist	PPAR receptor agonist	INS, PPARD	PPAR receptor agonist, Insulin sensitizer	-21.72	-69.13	-12.28	0	-64.14	-2.15	-32.71	-27.22	-26.99	-15.19	-49.12	-21.2	-1.9	16.64	-39.25	-46.34	-73.07	-19.96	-35.51	-51.08	-36.27	-24.5	7.43	24.17	-73.35	-69.23	-74.37	-19.75	-16.63	-16.05	-47.47	-37.64	-10.57	14.62	13.07	37.61	-5.94	-69.86	-18.18	-38.35	-35.77	-43.87	-57.87	-30.99
BRD-K05396879	15-delta-prostaglandin-j2	PPAR receptor agonist	PPAR receptor agonist	PPARG, NR1H4	PPAR receptor agonist	-2.36	-26.89	0.99	55.71	-27.04	-2.15	-22.08	-0.99	-33.96	0.21	0.95	0.99	-27.23	-4.02	13.61	82.85	-13.34	71.25	-9.37	-1.29	6.85	-49.38	72.69	41.93	-47.95	-35.25	-37.91	-3.81	-12.07	-51.15	-7.24	-43.21	-25.5	1.92	-5.36	-8.68	-0.99	-55.98	-1.16	6.04	-25.56	0.32	12.68	-71.74
BRD-A75517195	thiazolopyrimidine	CDC inhibitor			CDC inhibitor	0	-53.35	-0.18	0.7	28.39	-2.13	52.58	0.74	-39.49	11.23	8.83	-22.06	-27	66.33	76.99	-32.16	-15.94	-0.53	-21.26	-57.48	5.21	12.36	-0.7	-8.89	0.7	-30.58	-4.65	-30.29	0.39	-8.49	9.43	0.67	-30.58	-6.75	2.11	-11.06	9	-12.35	-4.67	-8.46	-0.74	-8.36	-41.41	-54.04
BRD-K03842655	penitrem-a	Potassium channel blocker		KCNMA1	Potassium channel blocker	3.54	11.28	7.11	1.76	9.66	-2.08	55.37	17.83	17.66	6.28	11.21	55.75	-7.95	9.31	27.31	5.09	7.06	2.4	11.24	17.31	28.63	2.34	3.65	-0.93	3.1	44.56	10.78	29.74	66.71	19.28	56.68	9.48	0.14	1.62	-0.92	3.76	30.1	3.84	28.22	25.24	12.22	37.2	4.24	51.24
BRD-K03109492	NSC-663284	CDC inhibitor		CDC25A, CDC25B, CDC25C	CDC inhibitor	5.37	63.62	76.85	-43.03	0	-2.04	17.23	50.49	31.02	-19.66	59.23	47.41	-24.36	-22.63	40.63	92.71	1.2	50.33	84.61	78.25	11.12	25.95	-61.16	84.65	0	18.64	52.4	81.6	-24.06	38.69	40.14	82.53	-20.43	1.9	8.21	19.63	32.81	36.84	59.03	-72.22	8.04	38.17	73	-17.08
BRD-K18816859	L-694247	Serotonin receptor agonist		HTR1D, HTR1A, HTR1B	Serotonin receptor agonist	-0.35	-29.9	-0.35	-0.99	-1.52	-2.02	-1.06	-30.24	-19.34	-20.93	-7.81	1.66	-5.83	-22.92	-33.87	-27.19	3.81	-5.59	-26.55	-9.26	3.28	-16.51	0.49	-5.36	-29.03	-23.14	-89.19	-81.69	5.36	-13.72	-10.31	-2.71	-4.51	-4.35	-0.63	-7.28	-4.12	-31.78	-16.55	1.97	-80.73	-23.44	-16.79	-75.09
BRD-K68332390	ponalrestat	Aldose reductase inhibitor		AKR1B1	Aldose reductase inhibitor	-50.76	-64.49	-27.28	0	-14.5	-1.99	-26.56	-77.94	-64.25	-47.68	-7.85	-22.29	-41.14	-11.13	-27.2	-13.25	-36.23	-9.37	-1.83	-41.85	-1.27	-16.56	-35.92	-9.42	-72.19	-34.86	-49.7	-40.32	-56.8	-20.28	-74.9	-30.63	-42.98	-6.27	-2.15	-15.56	-24.33	-64.49	-39.87	-28.77	-70.06	-21.79	20.15	-87.59
BRD-A74500471	ethambutol	Bacterial cell wall synthesis inhibitor	Bacterial cell wall synthesis inhibitor		Bacterial cell wall synthesis inhibitor	1.44	14.83	1.37	-2.26	-9.85	-1.97	1.52	-31.34	2.08	-33.15	-61.26	-28.42	-8.71	-49.77	-52.78	-71.33	1.94	-10.55	-26.37	-66.88	-63.47	-59.98	1.37	-83.08	-3.17	24.61	13.53	-31.56	-3.14	-16.9	-16.28	-2.85	0	-18.03	27.05	33.8	-1.9	17.21	-28.39	3.35	-13.7	-23.2	-15.31	-51.9
BRD-K02526760	QS-11	ARFGAP inhibitor		ARFGAP1	ARFGAP inhibitor	-12.29	-0.81	-10.03	1.17	-0.67	-1.95	24.39	-4.87	4.37	-7.15	7.99	7.92	-0.46	-57.58	-3.71	-0.14	-11.18	-83.77	17.18	14.28	-8.43	-0.6	-4.76	-2.43	-23.76	-0.74	2.2	-12.15	-58.52	3.7	-6.72	1.74	-35.58	-18.5	6.47	1.93	3.72	0.78	18.9	-12.53	-0.46	-25.72	10.15	9.61
BRD-A87606379	nadolol	Adrenergic receptor antagonist		ADRB1, ADRB2, ADRB3	Adrenergic receptor antagonist	-0.21	-34.85	4.19	-7.15	-31.29	-1.94	6.18	-2.8	-38.6	-54.3	-27.95	15.61	-3.33	-1.83	-34.04	-75.67	-61.45	-46.91	-58.85	-56.56	-8.56	-46.81	1.62	-74.43	-66.16	-34.72	-35.25	-9.02	3.18	-18.92	-8.86	-4.82	-3.14	-9.66	1.66	-44.75	-8.44	-41.33	-3.88	33.32	-17.14	-21.63	-1.79	-35.83
BRD-A10355991	norketamine	Glutamate receptor antagonist		CYP2B6, CYP2C19, CYP3A5, GRIN1	Glutamate receptor antagonist	-6.09	-68.78	-1.17	0	1.76	-1.94	8.9	-51.21	-28.14	-0.95	-71.76	-6.97	33.87	-43.09	-34.67	-62.09	-43.92	-24.95	-56.26	-43.57	-48.02	2.71	20.42	-52.68	-87.7	-16.54	-14.38	-30.55	1.58	-62.43	-28.42	-16.57	-21.66	-1.94	-21.07	-22.43	-29.02	-25.52	-36.85	30.01	-27.49	-30.41	-22.44	-30.35
BRD-K31627533	rimexolone	Glucocorticoid receptor agonist	Glucocorticoid receptor agonist	NR3C1, SERPINA6	Glucocorticoid receptor agonist	0	-24.07	-0.88	-1.26	-1.41	-1.94	-6.99	-47.88	-46.92	-73.12	-1.94	20.72	-1.41	0.85	-58.78	-56.96	-27.34	-18.93	-62.14	-45.34	-15.61	-65.67	-34.61	-32.65	-5.58	-81.94	-36.64	-55.61	-22.88	-84.17	-11.75	-27.13	-34.45	-40.66	-2.85	-18.04	-42.23	-58.96	-2.18	-44.7	3.74	22.81	34.72	-91.8
BRD-A41995253	brucine	Glycine receptor antagonist		CHRM1, CHRM2, CHRM3, CHRM4, CHRM5	Glycine receptor antagonist	-3	-12.2	-1.71	-0.6	14.61	-1.94	-32.26	-19.65	-12.23	-14.94	-51.33	-23.7	-33.19	2.22	-12.27	-3.11	-10.72	-5.43	-18.15	-49.46	-27.73	-10.39	4.52	-2.82	-14.62	-43.98	-46.67	-5.57	-28.44	-17.57	-29.33	-29.67	-23.29	-5.38	-5.32	-21.1	-12.85	-23.34	-22.73	6.34	-42.67	-22.69	6.71	-56.56
BRD-K39965020	doconexent	PPAR receptor agonist	PPAR receptor agonist	FFAR1, PPARA, PTGS1, PTGS2	PPAR receptor agonist	-6.71	-8.95	-9.65	0	-4.48	-1.91	-2.22	-5.09	-5.66	12.21	-3.61	6.18	-8.37	-0.53	0.49	1.66	0.49	2.7	4.76	-2.71	0.53	3.46	15.29	28.73	0.28	-0.35	-11.19	0.53	-27.17	-3.57	8.73	-26.87	-0.35	-9.22	25.42	-20.39	1.52	-8.12	0.49	1.23	-12.09	-28.64	8.74	-14.99
BRD-K16444452	ibudilast	Leukotriene receptor antagonist		PDE4A, PDE4B, PDE4C, MIF, PDE10A, PDE3A, PDE4D, TLR4, CYSLTR1, IL1B, IL6, PDE11A, PDE5A	Leukotriene receptor antagonist, Phosphodiesterase inhibitor	0	-18.35	0.15	7.36	-11.24	-1.9	-50.04	-0.35	-53.12	-6.11	-68.51	-9.79	-6.38	-46.31	-46.87	-24.11	-14.12	-8.48	-43.52	-39.28	-73.3	-4.97	1.62	-31.18	-11.91	-23.89	-34.42	-43.1	12.88	-23.77	12.18	1.62	-2.82	-19.05	5.57	1.83	-23.97	21.89	-12.76	-67.14	-28.54	-20.97	-16.88	-76.81
BRD-K46212057	voriconazole	Cytochrome P450 inhibitor		CYP2C19, CYP51A1	Cytochrome P450 inhibitor	0	-60.21	0	-10.74	0	-1.87	-45.35	-23.42	-70.11	-38.02	-55.82	-58.72	20.05	-60.59	-62.91	-63.26	-61.42	14.13	-85.03	-48.97	-41.62	-46.7	0	-62.92	1.66	-76.14	-47.54	-6.55	3.81	-72.48	-65	-34.43	2.01	27.62	-46.65	-26.44	-59.69	26.73	-27.84	34.71	-80.03	-58.74	43.68	-53.4
BRD-K92817986	BJM-CSC-19	MEK inhibitor			MEK inhibitor	26.81	8	31.63	-12.03	0.21	-1.87	-9.94	0.21	9.14	-0.56	-13.09	10.58	-11.39	0.85	-16.5	2.19	1.69	1.27	3.64	-10.43	11.06	12.48	-0.21	-7.51	-56.06	2.26	-12.48	10.59	0.03	-11.37	-8.01	0.07	-1.59	-0.25	0.32	-4.39	67.41	-11.97	-3	1.52	-0.43	27.86	0.46	-10.66
BRD-A67799922	phenoxybenzamine	Adrenergic receptor antagonist		ADRA2B, ADRA1A, ADRA1B, ADRA1D, ADRA2A, ADRA2C, ADRB2, CALM1	Adrenergic receptor antagonist	0	4.49	0.02	-0.81	-26.5	-1.83	1.39	17.95	22.5	-1.59	0.21	3.19	-0.63	0.85	-1.97	6.44	26.59	11.34	-4.05	13.02	2.92	-2.96	8.18	12.78	0.18	1.37	-14.53	15.52	-9.2	16.15	4.72	-0.25	-0.53	5.01	15.12	-8.2	20.83	-4.58	1.91	0.71	0.88	3.91	-4.92	2.29
BRD-K82795137	loratadine	Histamine receptor antagonist	HRH1 antagonist	HRH1, CYP2C19, CYP3A5	Histamine receptor antagonist	-0.21	45.05	0.14	-0.67	-0.21	-1.83	70.13	41.32	79.29	60.3	87.11	52.57	-0.21	2.82	88.78	92.51	90.38	73.46	79.68	60.26	85.33	46.57	47.51	82.74	-36.02	73.64	-33.88	38.89	82.4	66.44	92.04	84.36	6.94	79.44	72.18	53.62	-27.16	79.58	19	86.03	85.97	86.67	53.61	59.31
BRD-K59597909	phenothiazine	Dopamine receptor antagonist			Dopamine receptor antagonist	0.39	-10.6	1.02	-2.22	28.59	-1.8	-32.32	-2.08	-26.65	-6.24	-31.16	-8.04	-1.59	-4.9	-9.26	-52.26	-58.18	-5.52	-87.63	-57.2	-41.89	-11.25	-0.95	-23.9	-9.02	-62.12	-16.2	-25.52	1.83	-28.35	-5.94	-5.95	-18.18	-4.28	-0.39	-10.77	-4.16	-23.74	-17.55	3.24	3.63	-20.9	-19.73	-39.67
BRD-K85402309	dovitinib	EGFR inhibitor	EGFR inhibitor, FGFR inhibitor, VEGFR inhibitor	EGFR, FGFR3, PDGFRB, CSF1R, FGFR1, FGFR2, FLT1, FLT3, FLT4, INSR, KDR, KIT, PDGFRA	EGFR inhibitor, FLT3 inhibitor, FGFR inhibitor, PDGFR receptor inhibitor, VEGFR inhibitor	1.76	12.41	16.94	-93.46	-1.55	-1.8	-4.58	-35.03	7.38	-47.85	-27.4	-74.51	0	-85.43	-14.82	-31.91	-5.9	1.55	-1.2	7.17	-3.53	-87.96	38.51	1.8	-36.9	30.06	-27.66	-20.9	0	-4.58	-41.11	-0.85	-78.29	8.87	-11.43	0.81	-10.82	10.5	1.81	-1.8	-1.16	-35.03	1.2	-9.09
BRD-K94689771	pinocembrin	CYP1B1 inhibitor		AR, CYP1B1, SRD5A1, SRD5A2	CYP1B1 inhibitor	0	0	0	23.35	-49.17	-1.8	18.39	8.9	-12.19	-7.39	8.92	14.83	20.22	57.22	-22.36	14.86	25.7	-44.23	-2.36	-24.76	1.83	35.18	31.09	-20.85	-14.15	8.26	19.2	0	27.11	-21.61	30.39	-1.44	9.4	30.11	-1.37	26.11	26.27	-12.77	11.94	-4.33	14.88	13.48	22.6	5.14
BRD-K17075857	chloroxine	Opioid receptor antagonist		OPRK1	Opioid receptor antagonist	0.18	42.12	0	-2.71	-2.68	-1.8	84.02	12.66	42.46	3.61	31.64	53.25	-44.15	15.54	32.4	91.49	44.75	22.35	70.04	81.73	26.06	25.59	24	62.93	-0.6	54.16	27.38	13.11	-19.71	77.84	28.43	69.83	-1.3	6.62	-0.35	62.98	9.01	58.9	31.62	0.28	25.96	68.22	61.92	41.25
BRD-K10705233	GW-405833	Cannabinoid receptor agonist	Cannabinoid receptor agonist	CNR2	Cannabinoid receptor agonist	3.28	14.84	1.28	-16.27	-25.59	-1.78	57.18	32.11	16.39	2.86	32.13	34.92	-1.23	-0.56	12.05	25.76	15.3	0.46	76.73	22.66	38.19	15.92	-35.8	41.95	0.99	50.72	21.41	73.76	57.53	54.94	11.76	10.94	33.17	-8.32	1.97	1.69	13.27	31.33	50.68	-9.87	18.07	61.46	55.36	46.11
BRD-K90333595	phentolamine	Adrenergic receptor antagonist		ADRA1A, ADRA2A, ADRA1B, ADRA1D, ADRA2B, ADRA2C	Adrenergic receptor antagonist	-1.73	-39.36	-18.82	-15.58	-1.87	-1.76	-72.53	-47.29	-29.62	-16.07	-35.79	-20	-45.05	-8.44	-29.78	-16.38	-27.6	-70.69	-40.61	-53.48	-2.75	-52.74	-18.39	-27.03	-53.98	-25.16	-39.7	-61.62	-31.84	-8.38	-23.72	2.78	-51.19	-2.14	50	-61.78	26.96	-11.13	-21.44	-23.12	-16.97	-64.85	-67.49	-36.68
BRD-K91243525	SR-142948	Neurotensin receptor antagonist		NTSR1	Neurotensin receptor antagonist	-9.17	-1.44	0	0	-0.78	-1.76	-12.12	-4.28	-20.24	-4.69	-11.13	-4.6	-30.45	-16.37	-32.06	-27.16	-18.5	1.8	-59.28	-4.47	-75.38	13.45	8.32	6.17	-32.94	1.29	-1.41	-9.25	45.98	-26.71	1.2	-29.7	-16.49	0	1.06	7.28	-25.93	-18.64	-15.94	52.35	3.7	-3.52	1.06	-4.58
BRD-K43330982	JTE-013	Lysophospholipid receptor antagonist		S1PR2, P2RY10	Lysophospholipid receptor antagonist	53.05	54.18	3.49	-18.04	6.03	-1.73	27.34	48.45	-8.13	0.49	-46.75	25.24	-4.09	-19.58	11.55	-3.13	-23.56	5.59	-17.27	-9.64	-37.23	-25.33	-0.53	-12.74	34.06	-13.21	34.62	-6.32	27.63	-19.13	-2.22	-1.09	4.67	11.7	-7.66	-21.84	-6.24	-52.48	-13.11	-44.91	39.7	36.98	-11.1	25.81
BRD-A10523515	GSK-429286A	Rho associated kinase inhibitor		ROCK1	Rho associated kinase inhibitor	-0.11	-11.56	-0.03	-48.97	-59.94	-1.73	-23.36	-57.89	-42.13	-21.49	-35.35	-14.37	-5.34	-85.68	-49.25	-90.8	-22.41	-19.27	-71.6	-49.65	-18.31	-50.34	0.56	-94.93	0.74	3.07	-15.55	-26.81	-32.42	-62.91	-42.29	-16.89	-1.83	-93.78	8.32	-2.04	-16.44	-13.18	-6.71	-16.11	-9.19	-1.02	1.09	-32
BRD-K68341547	W-9	Calmodulin antagonist	Calmodulin antagonist	CALM2	Calmodulin antagonist	-1.23	-38.94	9.58	-21.02	-6.41	-1.73	-27.9	-34.11	-50.99	-4.48	-1.76	-36.71	-52.88	0.74	-27.92	-22.24	1.3	-35.89	5.23	-32.76	-1.59	-62.03	-8.24	-55.1	-71.44	20.56	-21.57	-66.3	20.72	-12.7	-11.68	6.69	-1.83	-17.75	-9.02	-41.35	-18.68	-39.43	1.83	-48.2	1.23	-35.77	-63.61	-29.8
BRD-A39969961	eplerenone	Cytochrome P450 inhibitor		NR3C2, CYP3A5	Cytochrome P450 inhibitor	-1.16	1.51	-1.13	0	-13.28	-1.73	34.5	-17.54	23.41	-21.44	23.17	42.74	-42.32	38.43	45.49	-56.63	24.48	49.98	-25.48	-27.22	-41.48	40.45	62.09	22.44	53.05	33.25	-15.65	-46.69	10.55	-38.21	38.53	-40.56	-8.1	48.04	-21.37	37.86	8.1	-15.22	22.86	52.46	82.21	31.79	33.15	20.64
BRD-A50764878	MDL-73005EF	Serotonin receptor antagonist		HTR1A	Serotonin receptor antagonist	-2.38	-2.71	-1.79	-1.69	-15.21	-1.72	-14.38	10.07	8.01	-0.25	-31.95	-39.89	-10.66	-12.32	-10.82	-22.08	-66.12	-2.11	-15.42	-34.7	-16.39	-57.25	-2.64	-80.93	-61.57	-15.38	-58.11	-25.1	-13.74	-43.47	-43.12	-7.72	1.21	-15.46	13.36	-33.13	-15.47	7.13	-19.27	-31.21	-28.57	-17.22	-4.5	-41.99
BRD-A17428743	BW-723C86	Serotonin receptor agonist		HTR2B, HTR2A, HTR2C	Serotonin receptor agonist	0	-26.25	-0.99	0	-19.24	-1.69	-2.4	-21.87	33.33	0	-57.32	22.74	-25.12	-78.27	-12.35	-23.16	-36.09	-18.46	-16.58	-39.73	-43.97	-58.28	6.36	25.34	4.48	55.96	-28.63	-42.28	8.72	-57.69	-10.56	-19.73	-6.09	10.24	7.82	-26.31	-59.79	-67.51	7.22	28.63	-5.46	-35.3	-50.48	-52.96
BRD-K21548250	moracizine	Sodium channel blocker		SCN5A	Sodium channel blocker	-1.06	-11.33	-25.85	0	-1.41	-1.69	4.97	-11.48	-2.54	-5.25	-60.4	-62.98	2.18	1.02	-57.96	-31.87	-28.47	-1.16	-2.04	-51.32	5.57	-20.51	1.79	-20.51	-84.58	-2.22	-5.2	4.57	-3.21	2.26	-38.06	-30.88	-54.84	19.78	3.17	8.44	-2	-1.97	-6.27	8.18	13.43	-56.67	0	-41.25
BRD-A25143711	hydrocortisone	Glucocorticoid receptor agonist	Glucocorticoid receptor agonist	ANXA1, NOS2, NR3C1, NR3C2	Glucocorticoid receptor agonist	37.46	10.76	24.92	-59.31	-37.11	-1.66	-15.27	-57.26	-36.97	-6.78	-7.38	-4.16	-60.07	-13.68	-61.87	-43.36	-15.63	-24.87	20.2	-8.86	-12.97	-49.01	-1.06	-0.42	-10.08	17.28	-23.3	-29.25	-74.64	5.88	-3.01	-50.88	-13.91	1.73	7	3.17	-19.37	17.82	22.25	-47.43	-36.75	-36.43	1.27	6.13
BRD-A49906757	scopolamine	Acetylcholine receptor antagonist		CHRM2, CHRM1, CHRM3, CHRM4, CHRM5, SI	Acetylcholine receptor antagonist	0	-25.09	-34.64	-3.23	19.79	-1.66	-30.18	2.15	-36.44	-38.28	19.11	45.65	-2.5	44.38	2.91	-27.52	3.81	-2.58	30.37	-43.57	-3.03	39.62	55.5	-46.59	-46.14	-55.74	-28.45	-34.4	2.89	2.5	-80.4	-20.7	-16.53	32.53	-21.97	-38.36	25.59	6.45	-11.15	-4.16	-21.79	-22.79	11.56	-15.73
BRD-A73581086	ergometrine	Adrenergic receptor agonist		ADRA1A, HTR1E, HTR2A	Adrenergic receptor agonist, Serotonin receptor agonist	0	-10.55	0	-45.46	0	-1.62	-1.69	-1.06	-16.44	-28.41	-34.27	7.9	-11.33	14.48	-9.09	-20.63	-13.33	7.31	-4.55	-46	22.93	-10.59	-31.35	-1.76	-19.67	-22.75	-16.91	-25.57	-6.01	-22.82	-23.75	-14.38	-22.48	-7.52	-26.75	-12.12	-26.1	-2.57	-11.54	0	-27.37	-10.85	-51.25	-19.86
BRD-A09828896	SKF-81297	Dopamine receptor agonist		DRD1, DRD5	Dopamine receptor agonist	0	35.21	2.18	0	19.51	-1.62	43.28	56	27.88	4.25	41.61	55.4	0.6	70.75	17.72	22.84	14.42	4.09	17.81	53.49	14.15	33.82	15.5	51	48.98	56.36	34.99	16.94	20.77	17.77	20.43	18.05	26.51	36.64	20.07	33.09	11.64	19.93	15.57	3.64	67.54	52.88	44.91	44.32
BRD-K08287586	butylparaben	DNA synthesis inhibitor			DNA synthesis inhibitor	-0.56	-20.93	0	-28.3	-69.99	-1.62	11.37	-31.84	7.36	-12.48	-6.83	-1.65	2.61	-10.01	10.42	-19.25	16.25	3.95	-14.87	-11.7	-6.18	-0.92	1.76	-18.83	-6.82	18.56	-23.88	-1.8	0.53	-10.82	16.88	-5.82	0.32	-29.68	2.57	8.19	11.69	11.71	7.63	3.19	28.47	14.94	-5.94	6.36
BRD-K34608650	BRD-K34608650	Cannabinoid receptor agonist		CNR2	Cannabinoid receptor agonist	1.09	13.13	24.4	0	-32.31	-1.6	2.15	-2.18	-7.73	-35.38	-9.48	-39.63	0	-22.2	-13.38	-10.23	-9.03	43.85	-10.76	-15.32	-15.17	-13.62	27.29	-30.53	-30.31	-26.8	-55.06	-8.01	-6.36	-47.27	-57.61	-6.19	-35.88	47.17	5.29	8.59	19.32	-28.57	15.94	36.96	-29.22	-26.38	51.46	-22.85
BRD-A99177642	deltaline	Acetylcholine receptor antagonist		CHRNA7	Acetylcholine receptor antagonist	-1.66	-52.68	-80.17	2.08	15.7	-1.59	-11.53	-28.57	-65.01	1.87	-30.87	17.85	1.66	15.32	-38.28	-22.46	-72.99	-61.69	-24.63	-24.85	-37.3	-5.43	-2.18	-42.73	-33.74	-40.49	-58.61	-22.91	-13.08	-49.92	17.36	-9.97	1.2	-16.8	1.73	-69.39	-14.61	-47.46	-43.37	6.06	-37.99	-37.81	-25.73	-36.36
BRD-K19309090	SR-95639A	Acetylcholine receptor agonist		CHRM1	Acetylcholine receptor agonist	0	-30.24	0	2.01	-51.17	-1.59	-79.49	-78.21	-91.96	-57.24	-35.99	33.45	-49.82	-11.81	-26.9	-24.72	-56.91	36.6	-90.11	-70.64	36.99	33.34	42.13	-93.42	-42.61	-23.13	-45.62	-86.69	-23.72	-92.55	-76.82	-56.73	-16.21	44.38	-1.55	6.56	-51.89	14.63	-43.97	-48.2	23.48	-51.1	-24.45	-32.15
BRD-K20313525	rosmarinic-acid	GABA transaminase inhibitor		MCL1, TYR	GABA transaminase inhibitor	-1.34	-11.08	-5.48	-1.99	-3.52	-1.59	-16.74	-23.37	-20.86	-22.35	-24.94	-29.91	-16.2	-38.12	-50	-44.07	-28.13	-20.97	-56.63	-57.02	-20.83	-63.99	0	-26.81	-45.83	-15.56	-69.28	-52.35	-2.61	-34.93	-45.71	-23.32	-43.75	-7.09	-21.32	-28.49	-20.25	-18.07	-21.72	2.57	-42.3	-28.16	-61.79	-16.83
BRD-K79425933	benperidol	Dopamine receptor antagonist		DRD2	Dopamine receptor antagonist	0	-1.37	0	1.09	2.33	-1.59	6.5	-2.04	-8.47	37.52	9.71	-6.95	21.41	11.78	1.44	-5.52	15.85	1.41	3.07	23.06	0.35	1.44	2.32	18	-10.42	-4.18	-13.45	-18.23	-13.44	5.35	27.07	-1.59	-2.96	21.14	-1.13	-1.3	9.87	-12.33	-1.76	30.09	-20.18	-25.82	13.29	12.2
BRD-K94379058	BML-190	Cannabinoid receptor inverse agonist		CNR2	Cannabinoid receptor inverse agonist	0	-1.27	0.56	-7.43	-0.78	-1.59	-3.88	-6.22	3.26	-1.37	8.9	-16.25	0.87	3.45	-9.18	3.07	33.32	28.12	4.57	-28.22	-1.25	6.44	-1.8	25.66	2.4	-8.51	-3.03	-18.54	-7.45	-1.23	-38.28	-7.36	-17.66	15.84	8.4	4.48	-21.33	3.03	5	-6.32	-17.55	-4.71	12.84	6.94
BRD-K11630072	carmofur	Thymidylate synthase inhibitor	Thymidylate synthase inhibitor	TYMS	Thymidylate synthase inhibitor	0	-15.37	0	-18.4	-22.54	-1.55	-49.66	37.71	-61.35	30.13	3.01	60.54	61.23	48.48	-59.6	59.55	3.64	10.06	24.8	75.87	4.19	36.02	-2.37	78.47	14.9	8.55	1.45	51.88	-1.69	15.61	-66.04	0.99	-1.91	-20.47	3.95	18.69	45.49	7.01	26.09	15.74	-46.03	-49.34	21.03	-38.25
BRD-K35629949	SR-27897	CCK receptor antagonist	CCK receptor antagonist	CCKAR	CCK receptor antagonist	0	-13.05	-1.76	1.62	0	-1.52	-40.33	-10.66	-17.65	16.21	-38.97	60.88	-36.99	34.31	23.96	-4.71	-18.63	-15.03	-26.14	-22.97	4.26	18.29	-26.52	-1.59	9.42	-75.06	-32.96	6.24	-2.54	-38.17	57.84	-1.8	-35.12	21.7	20.11	-41.19	25.66	-63.58	-4.6	-2.64	-28.45	-43.15	-42.35	-62.94
BRD-A03623303	metoprolol	Adrenergic receptor antagonist		ADRB1, ADRB2	Adrenergic receptor antagonist	-1.23	-9.01	-3.89	-2.22	17.72	-1.52	-24.68	-10.11	19.39	-2.15	5	-5.47	-2.26	1.47	13.67	-21.67	-3.98	-8.24	-12.36	-4.79	-13.1	17.79	-9.81	5.21	7.8	11.21	-27.16	-1.55	-15.46	14.22	1.2	-1.3	6.37	-7.46	13.99	-10.65	10.55	11.3	-2.15	-5.09	24.66	-16.77	-23.4	1.13
BRD-K71430621	clobenpropit	Histamine receptor antagonist		HRH3, HRH4, HRH1, HRH2	Histamine receptor antagonist	-2.4	-18.79	-2.03	-1.27	-6.15	-1.48	-40.11	-38.32	-36.48	-0.67	-59.86	-21.49	-2.71	-31.26	-53.68	-42.64	-5.52	-3.63	-17.44	-19.26	-9.51	-60.79	-2.22	-37.64	-8.23	2.5	-82.41	-45.82	-1.27	-13.54	-36.99	-14.99	-23.52	20.37	-11.29	-24.49	-25.97	14.9	4.21	2.5	2.5	-15.43	-10.09	-25.51
BRD-K43245338	MDL-28170	Calpain inhibitor		CAPN1, CTSB, CTSL	Calpain inhibitor	1.48	-67.34	11.4	-18.67	-10.57	-1.48	27.07	36.87	7.22	-1.18	-63.43	-12.8	31.22	-30.05	39.01	-5.35	23.9	35.83	-58.72	18.43	-37.12	-77.69	30.75	-46.47	-10.78	42.81	-68.51	-56.58	-12.28	-28.22	36.32	-51.2	1.37	-34.76	-20.66	10.08	27.17	10.2	6.2	11.66	-46.01	-18.26	40.47	-44.26
BRD-K43797669	genistein	Tyrosine kinase inhibitor		CFTR, ESR2, EGFR, ESR1, ESRRA, ESRRB, ESRRG, NCOA1, NCOA2, PPARG, PTK2B, TOP2A, TRPC5	Tyrosine kinase inhibitor	0	-71.09	0	44.17	0.07	-1.44	-51.25	-14.36	-50.53	-4.26	-72.64	-43.15	-7.74	-42.32	-43.8	-24.59	-76.74	-19.38	-20.66	-12.77	-52.35	-35.38	-5.55	-29.44	-22.86	-55.58	-67.49	-52.2	-7.48	-68.9	0.78	-69.75	-29.25	-6.59	-7.75	-63.95	-0.95	-40.29	-52.21	-14.57	-12.29	-91.35	-30.71	-66.01
BRD-K64746805	MBCQ	Phosphodiesterase inhibitor		PDE5A	Phosphodiesterase inhibitor	7.67	6.74	17.3	-24.11	61.97	-1.44	0.81	22.29	25.87	51.47	12.82	40.79	-7.94	83.93	52.35	21.04	3.33	22.16	3.54	8.1	4.26	22.6	0	5.11	-11.74	6.21	17.02	15.21	14.82	10.18	50.49	0.7	-1.41	59.55	12.69	69.09	39.18	16.38	9.71	-24.34	50.29	3.89	19.58	34.33
BRD-A13133631	fluorometholone	Glucocorticoid receptor agonist	Glucocorticoid receptor agonist	NR3C1	Glucocorticoid receptor agonist	0.76	27.72	6.16	-57.33	-70.63	-1.43	48.29	-15.33	4.62	-0.65	19.14	5.1	21.93	1.09	-6.43	-34.65	6.08	75.71	-14.92	59.26	52.53	-51.98	8.55	71.85	22.27	27.58	-12.07	11.87	-57.04	7.24	-58.71	-42.88	28.05	84.49	-21.45	-15.92	65.67	6.93	1.16	29.19	13.76	41.27	82.59	14.1
BRD-K34092021	arvanil	TRPV agonist		CNR1, TRPV1	TRPV agonist	0	2.47	0	69.32	2.4	-1.41	56.23	2.11	43.18	12.57	22.96	8.82	29.3	13.54	30.24	16.69	-24.67	-19.64	-23.8	7.66	23.02	4.55	48.23	27.14	18.49	6.29	-29.36	22.07	-2.15	-56.03	20.93	2.11	-1.83	17.56	61.55	17.97	-18.41	9.05	-3.14	-9.26	-16.7	32.84	12.11	19.13
BRD-K15409150	penfluridol	T-type calcium channel blocker	T-type calcium channel blocker	CACNA1G, DRD1, DRD2	T-type calcium channel blocker	3.49	72.08	30.21	-30.54	-36.44	-1.41	88.91	74.19	79.54	1.94	57.37	78.69	1.94	20.65	67.6	86.4	62.74	46.75	86.89	82.07	79.01	44.33	-18.3	75.61	35.57	79.59	36.49	58.56	34.58	85.12	71.38	85.42	-20.75	5.96	22.78	65.97	64.16	75.57	80.66	47.57	38.14	84.73	61.41	58.25
BRD-K15935639	z-leu3-VS	Proteasome inhibitor	Proteasome inhibitor		Proteasome inhibitor	40.28	64.81	53.9	3.61	-28.86	-1.39	62.8	34.47	79.16	37.86	81.23	64.33	1.89	0.54	68.26	93.42	37.08	87.79	90.31	65.16	76.41	59.52	18.77	82.46	-1.31	45.36	12.96	70.6	-35.45	68.86	22.47	15.72	0	81.13	12.5	1.84	45.2	18.72	42.92	62.85	21.25	91.68	73.5	26.22
BRD-K63979671	etifenin	Compound used in hepatobiliary scans of the liver			Compound used in hepatobiliary scans of the liver	1.85	9.32	0.35	0.03	22.4	-1.37	-5.14	-1.73	-43.68	-56.49	-9.1	5.11	0.69	-13.47	7.94	-31.33	-34.52	17	-13.28	-26.04	-0.21	-14.38	21.52	-8.98	15.93	-32.61	-10.02	-12.28	-9.91	-46.1	-44.52	-19.73	-14.22	24.98	1.83	7.19	7.98	-10.03	9.51	19.05	39.05	-31.15	60.65	-55.65
BRD-K97181089	amiloride	Sodium channel blocker		SCNN1A, ASIC1, ASIC2, SCNN1B, SCNN1G, AOC1, ASIC3, PKD2, PKD2L1, PLAU, SCNN1D, SLC9A1, TRPC7, TRPV2	Sodium channel blocker	-0.14	-23.67	-0.18	-13.5	0.32	-1.37	-32.38	-13.11	-36.83	10.14	-12.61	-28.07	-11.29	2.15	-71.96	-13.87	-29.84	3.03	-66.29	-60.34	-32.1	-38.05	24.77	-41.89	-20.65	-29.3	-80.64	-79.41	-17.43	-73.67	-14.91	-28.03	-2.26	-27.55	-2.22	-76.46	-7.66	-60.59	-44.94	-48.44	-55.13	-59.54	-57.77	-77.3
BRD-K59962020	CHEMBL-374350	NFkB pathway inhibitor			NFkB pathway inhibitor	11.45	67.23	72.03	-82.81	-33.78	-1.34	-9.73	0.42	6.36	-0.46	5.26	10.85	-0.42	-3.21	3.49	48.88	71.15	55.65	50.24	2.55	59.66	-6.87	0.46	15.12	50.39	55.93	41.36	0.46	43.44	26.02	-0.28	25.61	-2.54	27.07	-16.5	1.13	5.78	86.44	38.57	40.67	48.63	61.33	59.74	64.63
BRD-K88789588	letrozole	Aromatase inhibitor		CYP19A1	Aromatase inhibitor	0.02	-15.28	-0.02	-0.14	0.46	-1.32	8.75	6.93	3.21	19.23	10.62	2.08	0	0.74	12.55	17.95	0.74	2.22	3.52	9.6	7.77	33.43	-1.11	7.75	-1.09	2.61	9.36	8.62	6.31	-10.03	33.56	20.36	13.39	14.87	4.73	7.44	23.17	-18.33	13.81	-8.45	-10.87	-1.11	12.02	27.79
BRD-A62809825	thapsigargin	ATPase inhibitor	ATPase inhibitor	ATP2A1	ATPase inhibitor	3.45	27.2	18.68	12.48	36.75	-1.32	93.16	20.36	45.57	9.45	6.38	28.15	-60.74	13.7	9.34	34.01	30.95	78.84	78.94	43.29	24.08	22.53	-14.75	35.98	17.32	57.48	14.12	67.74	-4.47	64.2	71.81	11.12	0.46	49.87	-1.2	32.02	48.49	34.37	55.85	5.84	-0.81	85.9	39.81	-6.51
BRD-A55594068	vinblastine	Microtubule inhibitor	Tubulin inhibitor	TUBB, JUN, TUBA1A, TUBD1, TUBE1, TUBG1	Microtubule inhibitor, Tubulin inhibitor	-0.53	-3.45	7.12	26.58	1.27	-1.3	26.26	5.2	52.37	-7.45	12.78	-1.23	-74.69	17.37	1.06	-11.1	-1.91	7.43	3.14	4.91	21.42	11.92	-22.68	21.41	0	2.5	-15.37	75.57	-70.56	12.86	16.13	-42.16	-1.27	57.55	-57.42	-28.61	-48.9	9	24.54	41.26	9.17	28.85	11.67	18.72
BRD-K83637872	SANT-1	Smoothened receptor antagonist		DHH, IHH, PTCH1, SMO	Smoothened receptor antagonist	-1.09	0	-1.16	0	15.43	-1.3	-13.56	-20.55	33.54	-0.67	16.21	25.25	1.16	-58.81	-16.43	-23.16	-1.27	6.66	17.89	5.78	6.86	-16.99	1.3	-13.45	1.09	-11.43	-9.41	-8.77	12.59	15.56	3.66	4.44	11.05	6.87	17.53	21.92	55.85	7.87	48.1	-24.67	33.45	1.52	2.61	6.69
BRD-A53576514	orphenadrine	Acetylcholine receptor antagonist		CYP2B6, GRIN1, GRIN2D, GRIN3A, GRIN3B, HRH1, SCN10A, SLC6A2	Acetylcholine receptor antagonist	0	-38.1	0.88	-34.14	-29.38	-1.3	9.07	40.84	-11.09	-20.96	14.4	2.64	22.78	-7.59	-41.28	-51.82	6.84	34.29	-11.6	-19.34	-39.08	-20.35	-20.4	40.6	-3.24	18.07	-27.59	-29.65	28.44	-12.4	-38.97	-28.36	13.29	42.91	8.76	8.25	-3.24	0.81	23.21	56.92	14.58	-26	19.97	9.49
BRD-K52397688	amperozide	Dopamine receptor antagonist		HTR2A, DRD2, FAAH	Dopamine receptor antagonist	-0.46	5.57	0.99	6.25	0.25	-1.3	14.24	55.49	49.57	63.8	37.58	65.62	-6.82	51.98	66.95	56.89	50.7	40.88	45.22	45.21	78.88	22.01	26.05	72.17	20.54	26.06	17.7	16.95	19.48	32.57	66.34	2.21	-0.21	85.2	14.95	12.95	5.15	28.15	50.41	16.67	53.26	89.46	54.21	28.62
BRD-K26548821	quinpirole	Dopamine receptor agonist		DRD2, DRD3, DRD4, DRD1, HTR1A, HTR2A, HTR2B, HTR2C	Dopamine receptor agonist	-1.27	-14.7	0	-1.52	-6.57	-1.28	-32.08	-2.14	-10.73	-6.55	3.88	41.47	10.04	22.39	4.58	-13.95	45.26	12.36	-14.67	-4.26	-6.74	-22.12	8.97	20.24	-23.17	-10.19	-5.95	-30.9	-2.64	-42.85	-30.43	-38.3	18.42	16.46	13.9	-8.2	0	-14.35	-5.76	-13.84	-12.1	-18.01	14.72	18.08
BRD-K64402243	ivachtin	Caspase inhibitor		CASP3	Caspase inhibitor	0	-19.12	0	-6.94	-1.09	-1.27	-10.32	-1.55	-68	-51.75	-30.78	-58.36	-40.79	14.64	-32.99	-16.97	-37.6	-33.46	14.62	-46.25	7.9	-50.61	10.74	-16.75	34.15	-80.91	-67.34	-27.99	-47.96	-29.35	-75.04	-35.72	-19.94	-58.33	-20.59	-58.58	-27.17	-29.59	-16.84	-38.76	-58.69	-68.69	-36.29	-69.8
BRD-K39746403	erythromycin	NFkB pathway inhibitor		CYP3A4, MLNR	NFkB pathway inhibitor	-0.07	-8.34	3.38	0.52	3.14	-1.2	14.74	-18.88	-43.66	0.28	-3.38	33.89	-5.53	-4.09	-2.75	-1.94	-16.46	-8.08	26.77	-18.4	-25.74	-35.42	0.11	-13.55	3.68	9.48	-9.88	-16.46	-18.09	-23.51	-9.95	-10.77	-6.45	3.64	-6.02	-37.35	-15.16	11.61	-1.83	-46.79	-16.22	-6.15	21.47	-27.87
BRD-A36066264	estradiol-benzoate	Estrogen receptor agonist	Estrogen receptor agonist	ESR1	Estrogen receptor agonist	4.53	5.24	3.77	-0.21	27.62	-1.2	10.83	-3.77	9.2	-0.42	3.42	42.89	-1.06	0.18	-2.36	2.68	-8.18	-9.03	3.16	-3.16	5.74	11.33	4.43	21.27	18.01	27.88	-3.15	29.71	-47.42	9.76	-5.41	-3.47	3.49	-8.14	-10.26	-2.64	1.23	6.64	0.81	0.28	13.6	-2.96	9.06	-9.44
BRD-K78633253	EXO-1	ARF inhibitor			ARF inhibitor	0.53	2.36	1.34	-16.2	-5.81	-1.2	-1.06	-32.31	9.92	-77.45	-28.88	47.23	8.45	25.63	-62.07	-36.62	-5.1	-9.94	-2.89	-24.12	-4.44	-4.25	-6.85	-5.85	-5.28	-40.88	-18.6	-30.97	-1.76	26.38	-81.25	0.35	-2.89	-16.97	-0.53	-10.78	-6.2	-3.56	30.72	-26.88	-18.78	-42.77	-47.32	6.87
BRD-A12016240	LY-278584	Serotonin receptor antagonist		HTR3A	Serotonin receptor antagonist	-3.07	-10.24	-2.5	1.87	65.65	-1.13	-42.81	-43.96	-18.93	2.36	-17.6	-12.82	36.11	-13.57	-3.17	-32.51	-17.32	-10.08	-2.47	-6.48	20.94	-14.87	-4.4	14.76	-4.65	-7.26	-8.57	-46.02	14.4	-10.65	-29.43	-15.78	-25.84	-4.98	-10.12	24.24	-9.65	-23.84	-9.02	-30.27	-23.11	-11.32	-18.43	-38.33
BRD-K87158025	benzamil	Sodium channel blocker		PKD2L1, SCNN1A, SCNN1B, SCNN1G, ASIC1, SCNN1D, SLC8A1	Sodium channel blocker	0.04	2.11	0.39	-14.85	0.25	-1.13	8.88	0.92	0.67	-1.83	-6.4	1.46	-1.02	-4.17	-2.5	0.78	0.7	-8.37	-33.13	17.25	14.89	2.11	1.02	-24.57	-1.97	5.35	8.55	-8.69	1.08	-19.83	-17.41	0.05	-11.24	-1.2	1.02	11.73	9.89	3.73	17.89	2.36	6.21	-15.28	-20.26	14.88
BRD-K51918615	iodophenpropit	Histamine receptor antagonist		HRH3, HRH4, GRIN2B	Histamine receptor antagonist	6.43	13.86	6.42	-81.15	-10.78	-1.13	-27.85	-36.39	55.89	0.7	-11.5	31.82	-26.6	-21.82	-6.06	-15.78	29.76	-54.83	36.04	15	35.41	-9.13	0.7	-37.97	-27.52	71.87	-5.84	-40.92	6.45	23.66	-21.04	0.92	-8.69	-32.6	0.7	-15.36	1.37	34.88	7.33	68.04	43.31	-32.69	-38.34	-6.84
BRD-K01648091	LE-300	Dopamine receptor antagonist		DRD5, DRD1, HTR2A	Dopamine receptor antagonist	-16.34	-35	-7.16	1.27	1.34	-1.12	-24.44	-5.95	-9.45	2.5	11.69	48.46	-1.61	-4.91	5.81	-1.9	-27.82	5.36	-24.25	-21.85	-16.57	-7.79	24.1	-35.1	-43.34	-13.88	-27.27	-27.56	4.55	-31.18	12.69	-9.02	-1.41	-2.66	-13.22	-26.2	-1.9	-1.55	-2.32	21.09	-27.77	-5.81	-7.33	-8.42
BRD-K89839824	raltitrexed	Thymidylate synthase inhibitor	Thymidylate synthase inhibitor	TYMS, FPGS	Thymidylate synthase inhibitor	-0.39	-0.54	-0.03	-0.46	2.69	-1.09	-14.18	-21.64	-40.72	-5.28	-2.61	-1.02	-0.03	-42.32	-30.29	35.54	-61.15	-29.67	62.31	49.87	-57.96	5.67	-35.29	80.75	-22.98	-18.6	-30.83	38.94	-48.42	-19.37	-43.83	-16.91	-28.17	-7.52	-59.66	3.83	-9.65	-55.52	-11.77	-57.11	-2.57	-80.39	-4.05	-58.12
BRD-K81528515	nilotinib	ABL inhibitor	FLT3 inhibitor	ABL1, KIT, BCR, CYP2B6, CYP2C8, DDR1, DDR2, PDGFRA	ABL inhibitor, BCR-ABL kinase inhibitor	-0.07	4.63	-0.7	1.59	0.7	-1.02	32.08	0.81	-37.81	1.06	-25.12	4.25	0.11	-3.14	1.3	27.18	-37.55	-27.18	53.21	24.82	-9.18	20.74	0.67	-13.24	-1.02	-17.91	-20.05	28.29	26.55	18.64	51.32	90.54	-0.46	-80.52	5.73	-86.83	-7.73	-21.63	-0.53	12.98	18.53	20.07	-79.91	13.15
BRD-K75478907	GS-39783	GABA receptor modulator		GABBR1	GABA receptor modulator	-7.51	-52.89	-0.56	-19.26	4.9	-0.99	1.34	-57.39	-33.99	-19.04	-8.82	-1.69	-13.15	-58.08	-47.46	-0.67	-22.28	-25.1	-22.36	-14.9	-25.7	-33.46	-13.2	-46.22	-37.51	-23.95	-62.48	-17.99	-24.48	-6.62	-21.88	-40.01	-1.62	-14.9	0	-10.78	-72.36	-9.55	-1.9	-71.64	-8.75	-32.81	-1.18	-19.45
BRD-K69690935	curcumin	Cyclooxygenase inhibitor		PTGS1, PTGS2, APP, CA1, CA12, CA14, CA2, CA4, CA6, CA9, CCND1, CYP3A4, DNMT1, DNMT3B, EP300, G6PC, MAPT, MMP13, MMP9, NOS2, XDH	Cyclooxygenase inhibitor, Histone acetyltransferase inhibitor, Lipoxygenase inhibitor, NFkB pathway inhibitor	-29.65	-53.81	-12.84	28.75	0.92	-0.99	-55.47	0	-22.54	2.07	-43.47	-29.24	-0.42	4.33	5.46	-18.25	-5.47	0.39	-10.29	-14.83	-24.15	-1.96	0.42	9.99	0	-27.44	-13.37	-41.46	-0.53	-17.24	-38.48	-6.27	0.52	21.82	-0.39	-0.85	9.38	-48.07	-14.59	53.7	2.26	-11.2	-26.42	-17.68
BRD-A26384407	chlortalidone	Carbonic anhydrase inhibitor		CA7, CA1, CA12, CA14, CA4, SLC12A1	Carbonic anhydrase inhibitor	-0.35	-6.2	-0.21	-2.05	1.69	-0.95	-11.69	-25.38	-59.98	-13.05	-13.95	-5.07	-35.96	-2.29	-23.3	-7.66	-28.28	-3.59	-14.46	-47.91	3.14	-24.66	-25.44	-14.65	-14.28	-27.78	-17.51	-52.56	-6.4	-25.88	-40.66	-9.1	-5.94	-23.01	-8.12	-41.66	-2.47	-52.65	-22.81	-49.58	-16.99	-22.92	-5.73	-51.5
BRD-K52735702	cefdinir	Bacterial cell wall synthesis inhibitor	Bacterial cell wall synthesis inhibitor	MPO	Bacterial cell wall synthesis inhibitor	1.38	10.36	25.14	-16.68	0	-0.95	14.36	49.45	81.31	0	53.73	44.5	-16.01	12.08	56.91	1.52	8.43	51.17	19.89	82.16	1.62	16.82	2.04	47.66	0	61.81	13	30.11	23.32	63.71	8.8	1.9	14.82	23.82	17.93	51.9	1.52	63.48	18.02	14.83	49.04	19.24	23.82	54.45
BRD-K77925998	quipazine	Serotonin receptor agonist		HTR2A, HTR3A, HTR3B, HTR1A, HTR1D, HTR2B, HTR2C, HTR6, SLC6A4	Serotonin receptor agonist	-0.7	-11.58	-1.52	-0.1	-7.89	-0.92	-27.6	-51.69	-51.66	-47.51	-35.74	-12.02	-31.88	-6.57	-50.94	-39.58	-37.36	-4.93	-20.44	-31.07	-10.27	-12.41	-11.2	-33.41	-33.65	-54.91	-57.17	-25.26	-13.32	-46.06	-93.79	-21.28	-10.88	-8.5	36.12	-27.09	-28.78	-43.17	-20.49	-46.88	11.14	-22.32	-9.73	-45.64
BRD-K96799727	pifithrin-mu	HSP inhibitor		HSPA1A, TP53	HSP inhibitor	-0.18	-0.53	-31.35	65.27	-30.24	-0.88	15.61	-0.56	23.09	-64.89	13.39	23.28	-0.56	4.67	-3.64	15.66	3.48	57.16	2.01	0.56	-2.88	-0.39	79.83	7.63	1.8	5.35	-54.34	-23.98	-24.48	2.71	10.18	-74.53	0.05	52.7	-1.23	4.5	65.95	-4.79	6.95	12.91	2.18	-3.04	8.22	0.65
BRD-K27665173	D-64406	PDGFR receptor inhibitor	PDGFR/KIT inhibitor	FLT3, PDGFRA, PDGFRB	PDGFR receptor inhibitor	31.6	66.01	5.77	-1.27	0.85	-0.88	39.01	33.59	5.78	0.63	10.24	5.64	15.8	0.46	-5.64	11.12	58.24	73.28	25.35	5.64	-20.8	-21.41	-27.41	4.7	-16.94	40.35	15.62	49.75	16.13	23.76	-2.18	1.34	13.27	-0.49	2.02	59.46	40.02	-32.3	3.02	-5.62	35.95	72.74	35.73	28.28
BRD-K19605405	ZM-241385	Adenosine receptor antagonist		ADORA2A, ADORA2B, ADORA1, ADORA3	Adenosine receptor antagonist	35.57	12.75	0.78	-4.4	0.95	-0.85	6.98	-8.49	-19	-32.54	-7.27	6.77	-6.01	-30.01	-48.69	12.46	-39.11	-18.63	-14.86	-18.57	-45.79	-11.83	-37.07	-69.7	-4.65	-15.37	20.05	-1.55	7.07	-14.13	-40.53	30.6	-1.16	-45.02	30.45	-0.85	9.03	-7.97	-28.97	-26.54	-47.12	35.62	4.43	-17.87
BRD-K30480208	torasemide	Electrolyte reabsorption inhibitor		SLC12A1, CYP2C8, SLC12A2	Electrolyte reabsorption inhibitor, Thromboxane receptor antagonist	-4.75	-5.21	-0.04	-0.62	1.06	-0.85	-7.99	-0.88	-2.43	-0.32	-22.27	-20.91	17.66	2.4	5.21	-10.92	-15.45	-5.36	-6.17	-0.46	0.97	-2.47	-0.53	-3.35	-23.46	3.1	-7.19	-18.97	1.59	1.59	-5	-33.67	0.39	1.2	-16.45	10.51	1.34	5.52	-0.28	0.18	-13.03	-7.65	-2.93	-7.13
BRD-K97158071	droperidol	Dopamine receptor antagonist	Dopamine receptor antagonist	DRD2, ADRA1A	Dopamine receptor antagonist	5.17	12.95	10.08	-5.77	-1.52	-0.85	17.45	4.44	27	-1.97	-15.41	4.4	10.52	14.27	-57.41	-25.97	-7.8	2.15	-35.26	32.61	-10.67	-26.19	5.59	9.01	13.46	-10.86	-53.2	-69.83	-3.18	10.43	12.35	-3.69	-14.81	10.09	-0.07	-13.03	-16.51	-12.4	-12.32	23.78	5.64	-38.35	2.96	-49.42
BRD-K47717570	NBQX	Glutamate receptor antagonist		GRIA1, GRIA2, GRIA3, GRIA4, GRIK1, GRIN1, GRIN2A, GRIN2B	Glutamate receptor antagonist	11.88	-10.28	-7.79	0.6	-0.21	-0.85	5.1	25.45	6.82	-9.59	-11.4	6.18	-12.29	3.79	6.82	11.01	4.48	-8.53	-1.55	-34.86	-26.3	0.21	4.22	8.34	3.35	3.28	26.7	3.96	7.13	-2.33	10.62	-0.35	-1.06	40.81	2.26	18.5	-14.32	-10.28	-10.8	3.09	3.35	9.13	-23.8	11.32
BRD-K63533170	AM-630	Cannabinoid receptor antagonist		CNR2, CNR1	Cannabinoid receptor antagonist	-1.09	0.88	0	1.09	1.13	-0.81	-9.11	-3.8	-19.8	-1.13	1.48	27.57	-10.14	-5.6	14.45	-8.84	2.89	21.74	-4.75	-51.05	41.79	-8.74	4.44	-32.96	-20.28	-1.55	14	10.44	-3.33	22.62	-28.23	-13.23	-1.55	11.23	-24.16	-19.6	-6.62	3.84	14.59	-1.58	-6.27	8.6	25.68	4.12
BRD-K14993104	bemegride	Chemoreceptor agonist		GABRA1	Chemoreceptor agonist	0	17.43	0.18	1.2	-1.38	-0.81	73.11	-8.15	23.86	-6.1	12.17	20.38	26.11	46.64	32.11	9.53	32.46	50.18	20.31	27.44	18.5	47.12	23.52	20.33	-5.76	19.61	27.67	33.74	38.27	12.23	11.97	18.34	33.2	37.76	26.4	-2.82	-19.41	15.75	29.25	35.31	33.73	27.28	37.59	55.98
BRD-K13169950	NSC-3852	HDAC inhibitor	HDAC inhibitor	HDAC1	HDAC inhibitor	0	68.76	25.44	0	-35.73	-0.81	90.57	63.46	66.7	-0.81	60.44	75.52	0	31.96	71.68	91.21	72.04	81.95	90.9	85.22	80.29	63.79	29.33	85.59	22.34	83.42	82.58	80.62	-34.62	81.44	41.58	48.04	22.82	43.73	24.22	51.85	71.76	80.05	84.8	28.01	78.41	77.06	73.16	48.2
BRD-K02404261	caffeine	Adenosine receptor antagonist		ADORA1, ADORA2A, ADORA2B, ATM, ITPR1, RYR1, ADORA3, ATR, ITPR2, ITPR3, PDE10A, PDE11A, PDE1A, PDE1B, PDE1C, PDE2A, PDE3A, PDE3B, PDE4A, PDE4B, PDE4C, PDE4D, PDE5A, PDE6A, PDE6B, PDE6C, PDE7A, PDE7B, PDE8A, PDE8B, PDE9A, PIK3CA, PIK3CB, PIK3CD, PRKDC, RYR2, RYR3	Adenosine receptor antagonist, Diuretic, Phosphodiesterase inhibitor	9.62	-23.97	0	-33.5	-4.79	-0.78	-14.67	-34.53	13.26	-57.82	22.15	-21.93	-14.84	-8.56	-16.17	-36.92	-35.84	14.18	-25.66	-14.11	-88.05	9.48	59.77	-29.95	13.31	-9.3	39.17	-16.93	-21.5	-42.16	-38.27	-12.09	0.04	13.45	0.07	9.3	-6.13	6.66	-0.67	-46.95	6.31	-43.82	21.27	-13.87
[truncated: 1,535 more rows]
[truncated: 11 more columns]
